# Supplementary material for: Integrated Transcriptome Analysis Reveals Plant Hormones Jasmonic Acid and Salicylic Acid Coordinate Growth and Defense Responses upon Fungal Infection in Poplar
Source: MDPI journal article supplement (doi:10.3390/biom9010012), 2019-01-02
Supplement: s1 [file s1]

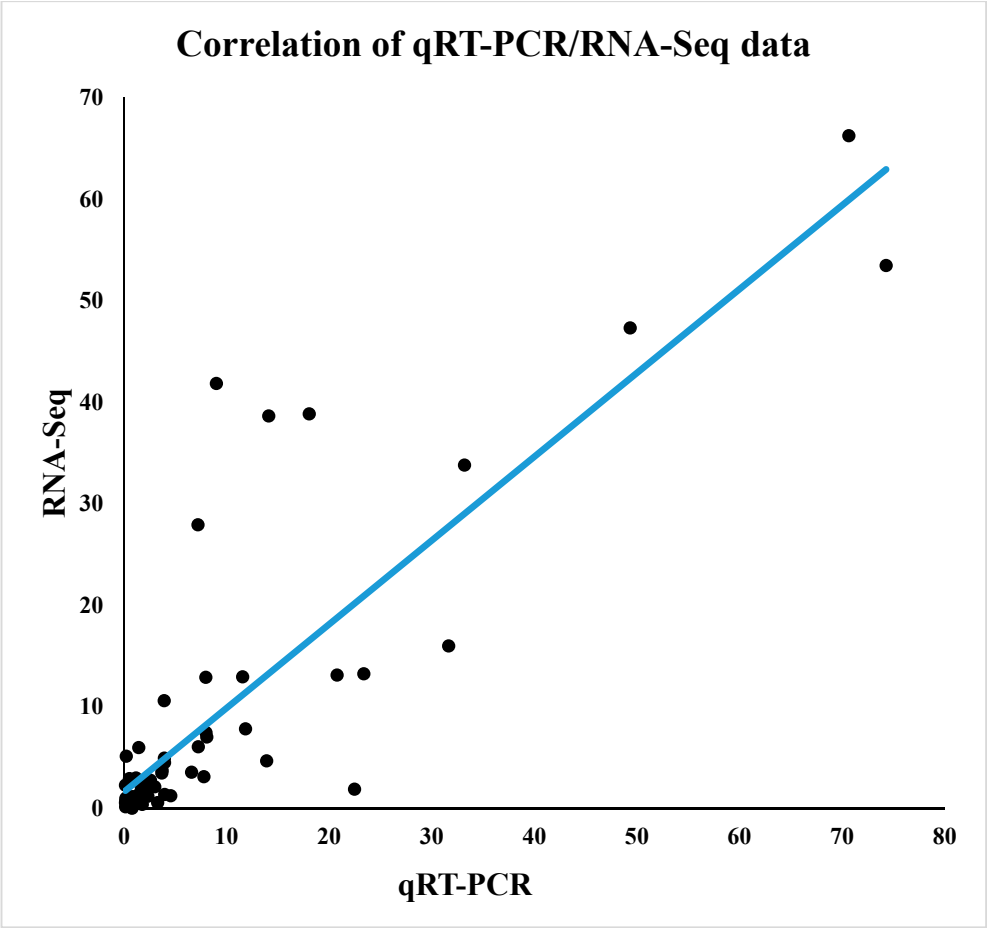

Figure S1. Correlation of qRT-PCR/RNA-Seq data for 9 tested genes.

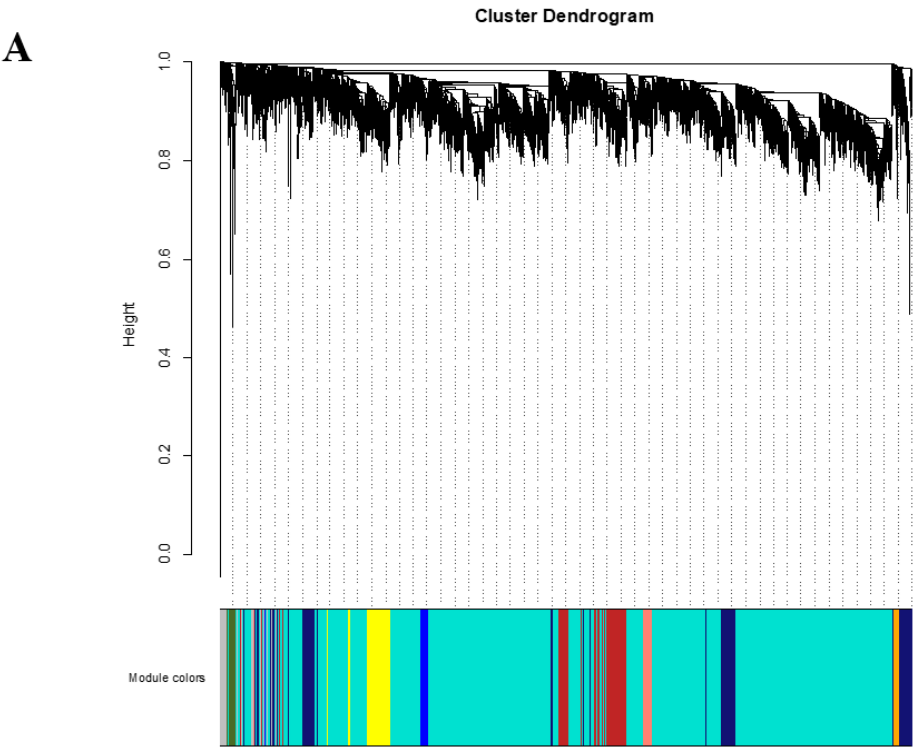

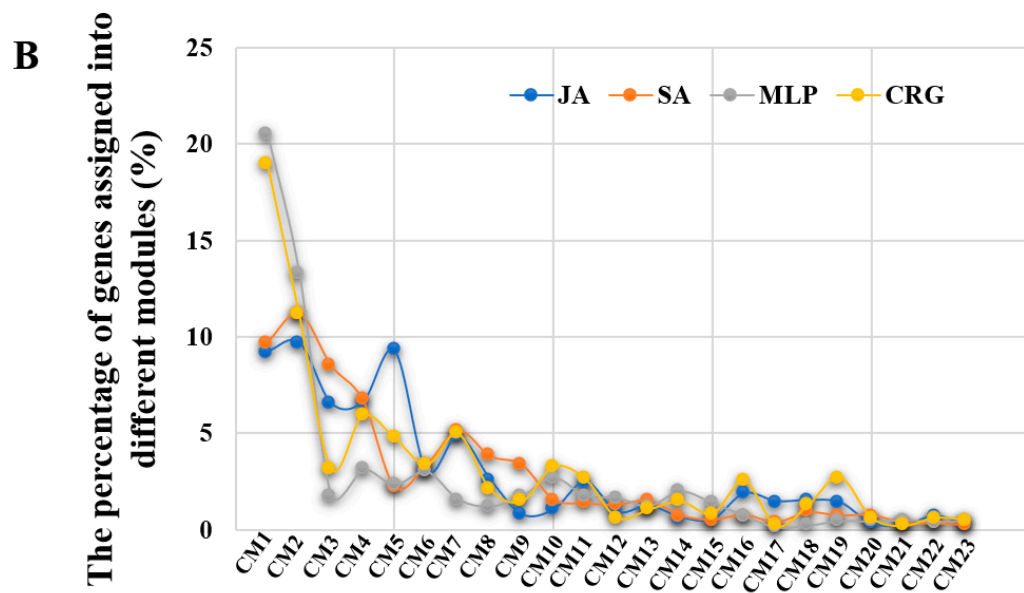

**Figure S2** Cluster dendrogram of 18 CMs for JA/SA/MLP-responsive genes during poplar fungal defense. Hierarchical clustering dendrogram of the average network adjacency for the identification of co-expression modules (CMs). Genes in the same CM show the same color. The percentage of genes assigned into different CMs for JA/SA/MLP-responsive genes and common responsive genes (CRG, B).
