# Supplementary material for: Integrated Transcriptome Analysis Reveals Plant Hormones Jasmonic Acid and Salicylic Acid Coordinate Growth and Defense Responses upon Fungal Infection in Poplar
Source: Biomolecules. 2019 Jan 2;9(1):12. doi: 10.3390/biom9010012 (PMC6358764; doi:10.3390/biom9010012)
Supplement: Supplementary file 1 [file biomolecules-09-00012-s001.zip › Supplemental_tables_r.xlsx]

## Sheet: Table S1
Table S1. Primers used for qRT-PCR assay
Gene ID	Primer name	Forward primer	Reverse Primer
Potri.001G288600	PtrPR1	ACTAAGGGACGGTTGCAGAA	CCACCCACATTTTCACAGCA
Potri.T175200	PtrPR3	GAGATCGCTGCTTTCTTGGG	GAAAGCTGGACAGGACCTCT
Potri.001G015600	PtrLOX2-4	GTCATCATGCCGCAGTGAAT	AGCCATCACTGTTGTAGCCT
Potri.006G109100	PtrWRKY89	AGGAGGACAATGACATGCCA	AACAGATTCCGCCATGATGC
Potri.002G196200	PtrbZIP53	GCAGGGTATCAATGTTGGCC	GGGCATTACTGAACAGGGGA
Potri.007G123700	PtrP3(YH3)	CCTTGCCCTTCCCAGAAAAC	AACCAAGCAGATGTCGAGGA
Potri.011G070100	PtrYH9	GTCATCATCTTTGCCGGCAT	GGTGATTCTGGACCGCTTTC
Potri.008G038900	PtrGATA9 (YZ3)	CCTCTGACCTATCTGCCGAG	TTGCTGGACGAGGAGTGAAT
Potri.004G158200	PtrbZIP44	CTTTCAGGCACCGTTCCTTC	GCCCAGCACAGAAGAATTGT
Potri.019G010400	Actin	TCATCGGAATGGAAGCTGCTGGTA	TAGTGGAACCACCACTGAGCACAA
Potri.005G198700	UBQL	TGAGGCTTAGGGGAGGAACT	TGTAGTCGCGAGCTGTCTTG

## Sheet: Table S2
Table S2 Identification of JA- and SA-responsive genes upon JA and SA treatments.
JA responsive genes								SA responsive genes
Gene model	logFC-JA2	logFC-JA6	logFC-JA12	logFC-JA24	p-value	q-value		Gene model	logFC-SA2	logFC-SA6	logFC-SA12	logFC-SA24	p-value	q-value
Potri.005G096200	-9.77844	-12.1264	-8.43721	-7.8622	6.62213e-50	1.53755e-46		Potri.002G180800	-4.4393	-4.91369	2.83034	2.68182	4.04936e-92	1.12556e-87
Potri.008G131400	-2.31541	-0.451814	-7.53334	-2.14887	3.39491e-45	4.07082e-42		Potri.001G031800	-5.50746	-6.25614	1.94423	1.57146	4.83879e-81	6.72495e-77
Potri.009G041100	-2.1268	0.872534	-5.52112	-1.95596	3.50656e-45	4.07082e-42		Potri.014G106800	-3.97808	-4.14859	3.53412	2.97197	4.75189e-78	4.40279e-74
Potri.001G079000	-3.669	-3.95047	0.853698	-0.0369621	1.58854e-36	9.41702e-34		Potri.008G131400	-3.03059	-2.09535	-7.59783	-7.62622	1.30757e-67	9.0863e-64
Potri.017G079000	-2.66697	-0.262248	-6.29031	-1.74279	2.27217e-34	1.11065e-31		Potri.005G096200	-11.8885	-9.24577	-11.7491	-8.95308	6.61208e-63	3.06316e-59
Potri.015G017100	-2.7475	-4.04886	-4.73667	-3.93922	2.91208e-31	1.06758e-28		Potri.003G193800	-4.45122	-5.07864	2.35976	1.80327	2.35902e-56	9.36732e-53
Potri.006G040800	-2.84614	-3.01874	0.822614	0.252474	1.17866e-30	3.9566e-28		Potri.001G243600	5.94668	5.9018	-5.11385	-1.27832	2.53297e-55	8.80081e-52
Potri.001G281700	-0.96171	0.359373	-4.99165	-2.09334	2.61692e-30	8.68006e-28		Potri.015G022100	-3.56755	-2.85383	2.66952	2.69644	4.46207e-55	1.37808e-51
Potri.004G020500	-2.16487	0.87039	-5.56361	-1.67304	4.79684e-30	1.55407e-27		Potri.010G002500	-3.97959	-3.99084	1.50794	1.6577	2.52378e-54	7.01509e-51
Potri.019G034000	-2.21827	0.140932	-4.82981	-1.46362	7.32468e-30	2.34575e-27		Potri.009G094100	-6.15301	-2.24658	1.82937	2.15888	5.97648e-51	1.38435e-47
Potri.019G031900	-3.42299	-2.38128	0.312278	-0.235124	2.14303e-24	4.55794e-22		Potri.015G140800	3.63174	1.32016	-8.82098	-6.38285	1.06533e-49	2.02282e-46
Potri.005G020300	-0.0360814	0.31955	-4.32407	-0.691502	3.22609e-24	6.80948e-22		Potri.005G054600	-5.46564	-3.07948	1.70639	1.19355	1.09161e-49	2.02282e-46
Potri.008G179500	-6.68326	-4.88648	-5.73647	-6.18413	6.25068e-24	1.28056e-21		Potri.019G056400	-4.8844	-1.89486	2.41478	2.89683	1.26282e-49	2.19383e-46
Potri.006G209700	0.658105	-4.97203	-0.608744	0.414703	4.35191e-23	8.19277e-21		Potri.004G142900	-7.70495	-6.03413	1.27704	2.26142	1.28658e-48	2.10363e-45
Potri.015G128100	-11.9606	-2.80566	-6.00002	-7.27163	6.77171e-23	1.25188e-20		Potri.014G029000	2.31867	3.35239	-4.03206	-5.5508	1.03031e-46	1.59102e-43
Potri.007G015500	-2.26389	-5.2381	-0.0526763	0.654443	1.76365e-22	3.11006e-20		Potri.015G017100	-3.36422	-4.49128	-5.36512	-5.56658	7.9912e-46	1.11062e-42
Potri.012G123600	-2.21688	-0.0946906	-4.0049	-1.86311	1.27033e-21	2.03414e-19		Potri.019G034700	9.86992	11.4792	7.78331	5.62658	2.35552e-45	3.04495e-42
Potri.010G135100	-1.10154	0.299962	-5.02654	-1.4107	1.33276e-20	1.91409e-18		Potri.006G277500	-5.7926	-2.66042	1.98101	2.77759	2.41002e-45	3.04495e-42
Potri.007G023800	-4.35212	-1.98294	-2.3716	-0.161457	1.51468e-20	2.15316e-18		Potri.010G112200	-3.26124	-2.96577	1.76197	1.36439	2.48347e-43	2.55669e-40
Potri.001G347600	-2.37203	0.308499	-3.3546	-1.75687	1.81284e-20	2.56393e-18		Potri.001G160400	-7.02511	-3.0614	1.20916	1.72644	5.79624e-43	5.55559e-40
Potri.001G025100	-0.958388	-3.67785	0.476572	0.126234	2.66076e-20	3.7067e-18		Potri.010G251800	-3.7166	-5.27606	2.07295	2.55272	1.3525e-42	1.21271e-39
Potri.010G066900	-1.39238	-4.07783	-0.313084	-0.208654	3.35162e-20	4.57759e-18		Potri.006G145600	4.1438	1.92252	-3.53149	-2.3869	1.51911e-42	1.31953e-39
Potri.019G079000	-0.543006	-0.025502	-4.29136	-0.727253	5.31974e-20	7.12589e-18		Potri.014G116800	-3.89638	-1.694	3.14858	3.4262	4.97665e-42	4.06856e-39
Potri.002G187300	-5.45011	-4.90516	-5.5767	-6.00153	7.42853e-20	9.71708e-18		Potri.011G044300	-3.10082	-3.53002	1.4729	1.21399	2.19278e-41	1.69307e-38
Potri.011G158600	-3.30249	-5.41207	0.390902	-0.359098	2.55626e-19	3.15144e-17		Potri.007G015200	-4.77855	-3.58979	1.22428	1.12972	3.08204e-41	2.31536e-38
Potri.010G237300	-3.86247	-2.55433	-3.52013	-3.31724	2.63602e-19	3.23545e-17		Potri.009G041800	1.47749	1.17476	-4.05588	-4.30884	1.04174e-38	7.06247e-36
Potri.019G005200	-4.18938	-2.08136	-4.6248	-0.74152	5.74413e-19	6.86879e-17		Potri.010G211500	-7.04521	-6.85251	-3.67587	-2.83279	5.635e-37	3.55978e-34
Potri.008G029700	-6.0817	-5.97723	-2.20488	-1.52677	8.96915e-19	1.03692e-16		Potri.003G165500	9.93788	6.10858	4.57345	3.29394	6.67482e-37	4.03333e-34
Potri.009G043900	-1.0406	0.949097	-2.91358	-1.47119	9.46123e-19	1.08929e-16		Potri.002G185700	-5.21539	-1.8043	1.338	1.79978	1.84469e-36	1.09096e-33
Potri.009G108200	-2.71992	0.609915	-3.46962	-1.27183	1.71226e-18	1.94722e-16		Potri.004G149100	1.8381	-1.38732	-3.11727	-2.67273	2.98818e-36	1.69509e-33
Potri.010G044100	-0.358584	0.68051	-3.97852	-1.99333	2.86289e-18	3.14038e-16		Potri.001G012700	9.81256	6.22954	2.49112	3.83046	1.53581e-34	7.48935e-32
Potri.001G468100	-5.02608	-1.58116	0.191305	-0.375161	3.19275e-18	3.46134e-16		Potri.014G157500	-1.91574	-1.51776	2.21632	2.45115	2.05835e-34	9.86448e-32
Potri.007G104800	-1.70956	-4.54599	0.703813	-1.59545	3.76404e-18	4.03361e-16		Potri.010G129200	6.63144	3.69581	4.87942	3.64095	4.47083e-34	2.10629e-31
Potri.011G010300	-2.01085	0.655609	-2.90975	-1.37863	4.28512e-18	4.5744e-16		Potri.008G135200	2.04022	1.34736	-6.03142	-5.3262	4.85559e-34	2.24943e-31
Potri.T170400	-2.31745	-3.34992	-5.03467	-4.66381	5.59221e-18	5.9019e-16		Potri.003G167500	1.47082	3.65144	4.10299	8.24285	1.0324e-33	4.55502e-31
Potri.001G145200	-3.40664	-3.14075	-3.00444	-0.313643	8.42828e-18	8.60179e-16		Potri.013G106200	4.55866	2.75844	-1.12671	-1.39217	1.63186e-33	7.08738e-31
Potri.015G134600	-5.32199	-3.2508	-1.44252	-1.16335	3.29849e-17	3.09436e-15		Potri.012G035200	-6.07891	-6.2577	-2.31966	-2.63745	2.00621e-33	8.44917e-31
Potri.005G130100	-1.82898	-1.08496	-4.72703	-0.891053	3.60075e-17	3.34413e-15		Potri.002G125900	3.70911	3.12877	-3.83175	-2.96674	4.57294e-33	1.81585e-30
Potri.012G055100	-3.16843	-3.05483	-2.44065	-2.45832	4.57169e-17	4.12221e-15		Potri.014G016300	2.75551	1.50507	-2.27578	-2.43981	2.71065e-32	1.01818e-29
Potri.003G163800	-4.1223	-1.7095	-0.779376	-1.01022	1.20769e-16	1.02371e-14		Potri.010G191900	-4.79712	-2.21647	2.15675	2.58659	1.20108e-31	4.33575e-29
Potri.007G052500	-3.28252	-3.29618	-0.402395	-1.38518	1.3007e-16	1.09487e-14		Potri.009G053700	-2.57203	-2.15188	1.40574	1.94001	1.27781e-31	4.5536e-29
Potri.010G232200	-1.07043	0.7439	-3.0364	-1.6569	2.89368e-16	2.33692e-14		Potri.004G209300	9.56452	4.95553	7.01549	4.21914	9.33997e-31	3.01876e-28
Potri.017G129100	-2.01217	-2.6794	0.519204	-0.30062	3.68481e-16	2.95018e-14		Potri.008G207700	-3.95771	-1.96144	2.44057	2.21604	1.22798e-30	3.92333e-28
Potri.008G049000	-4.34955	-1.74395	-0.359441	-2.37431	5.87508e-16	4.62405e-14		Potri.014G141500	-2.60211	-3.01818	-3.77078	-4.53018	7.64141e-30	2.25958e-27
Potri.019G034100	-2.31896	-0.46138	-3.22079	-1.41461	1.04227e-15	7.96064e-14		Potri.009G101400	3.11449	2.38105	-4.76097	-3.95245	8.18179e-30	2.36897e-27
Potri.010G092900	-0.776142	0.429382	-3.41848	-1.34573	1.28268e-15	9.5724e-14		Potri.015G073600	-2.30653	-1.82555	1.34905	2.24121	1.51944e-29	4.22343e-27
Potri.002G167500	-1.05333	-3.21248	0.918553	-0.617674	1.61753e-15	1.18599e-13		Potri.001G145200	-2.91403	-3.54412	-4.61127	-4.6748	2.03042e-29	5.47937e-27
Potri.015G016500	-1.68104	-2.51537	-4.00401	-3.01525	1.76593e-15	1.28466e-13		Potri.009G148000	3.58461	4.11899	2.7292	8.71495	3.09829e-29	8.12454e-27
Potri.005G206900	-13.4521	-7.36657	-5.94511	-6.87872	1.78253e-15	1.29335e-13		Potri.014G143400	-3.47451	-3.43794	-2.57787	-3.78181	5.14708e-29	1.33709e-26
Potri.015G002300	-1.34453	-0.534069	-3.91895	-1.16258	2.22062e-15	1.59051e-13		Potri.004G050000	6.25431	5.12213	1.3082	1.01707	7.82878e-29	1.99641e-26
Potri.001G077400	-4.5538	-1.4991	-1.00729	-0.101618	2.63516e-15	1.87777e-13		Potri.008G022100	-4.74205	-2.49832	-4.32909	-4.25703	1.0276e-27	2.34123e-25
Potri.003G110700	-3.32477	-1.20487	0.832198	-0.355732	2.70954e-15	1.92584e-13		Potri.001G353500	2.66491	1.31589	-1.11466	-1.28192	1.419e-27	3.18086e-25
Potri.014G037200	-2.11174	0.131826	-2.46073	-1.87414	3.63024e-15	2.52864e-13		Potri.011G032300	-5.99602	-2.9862	-5.0663	-3.4955	3.22472e-27	7.05782e-25
Potri.014G143400	-2.13864	-2.71494	-2.80958	-2.13263	6.26998e-15	4.26083e-13		Potri.012G008700	-1.82696	-1.2735	-7.78798	-6.45066	3.74082e-27	8.06045e-25
Potri.009G151600	-1.86359	-2.9077	0.837874	-0.32837	1.19079e-14	7.75183e-13		Potri.005G078700	-2.89189	1.2563	2.07673	2.81777	5.46212e-27	1.15897e-24
Potri.008G194100	-1.01105	-4.11148	-1.55387	-0.253031	1.38974e-14	8.94251e-13		Potri.003G115300	-3.10771	-2.22483	1.35799	1.25217	8.9924e-27	1.86532e-24
Potri.001G213200	-1.99199	-1.80523	0.498982	0.669306	1.74557e-14	1.09786e-12		Potri.016G083900	-4.52684	-1.43335	2.21249	1.46285	1.37009e-26	2.75963e-24
Potri.013G150500	-0.0249323	-3.62689	0.969267	0.615771	2.6136e-14	1.61699e-12		Potri.003G081200	8.92044	5.9597	3.73171	3.27415	1.52157e-26	3.02096e-24
Potri.T178700	-1.56527	-2.96153	0.696564	0.852531	2.61742e-14	1.61699e-12		Potri.004G121800	-3.55726	-2.49654	1.21787	1.04738	1.8424e-26	3.61572e-24
Potri.005G117100	-0.983043	-3.04952	0.449696	0.205626	2.80824e-14	1.72342e-12		Potri.013G090300	6.07585	6.27687	1.88759	1.95129	1.86015e-26	3.61572e-24
Potri.004G203000	-3.49573	-3.44834	-0.914997	-0.780274	3.08575e-14	1.86497e-12		Potri.004G202900	-4.20205	-1.00756	1.67756	1.42643	3.89172e-26	7.35878e-24
Potri.014G034600	0.714207	0.199724	-3.09946	-0.00105233	3.24005e-14	1.95399e-12		Potri.005G130100	-1.05059	-1.72993	-4.30762	-4.83855	4.31691e-26	8.10763e-24
Potri.008G176000	-2.16665	-2.61687	0.640137	0.598586	3.46777e-14	2.0868e-12		Potri.002G187300	-5.76928	-6.71834	-8.22437	-4.1654	5.75565e-26	1.07372e-23
Potri.008G013500	-0.256977	0.904446	-3.91876	-0.472626	3.9041e-14	2.32925e-12		Potri.003G113100	4.1332	3.37805	5.12206	6.94757	8.33686e-26	1.54488e-23
Potri.006G006000	-2.97571	-2.4905	-0.636697	-1.15144	5.70769e-14	3.33391e-12		Potri.008G059800	-1.93922	-1.54857	2.62756	4.08614	9.27215e-26	1.70681e-23
Potri.010G003200	-2.80933	-2.15895	-1.27918	-2.16804	6.22329e-14	3.61236e-12		Potri.019G003500	8.49054	5.62618	4.09519	4.34483	1.35984e-25	2.48672e-23
Potri.001G120500	-2.11026	-1.54188	-3.33084	-2.9368	6.51003e-14	3.76312e-12		Potri.001G120500	-7.74617	-6.64819	-2.09414	-1.64671	1.46584e-25	2.64574e-23
Potri.004G030800	-2.31797	0.472669	-4.4402	-8.3952	1.01765e-13	5.78646e-12		Potri.008G096500	-2.52253	1.31053	2.06731	3.21384	3.53539e-25	6.14186e-23
Potri.007G080600	-1.77317	-2.95437	0.0453772	-0.763153	1.31092e-13	7.34101e-12		Potri.008G153300	-6.68181	-3.59158	-3.64903	-2.92895	5.10534e-25	8.71538e-23
Potri.009G151400	-0.867344	-2.80719	0.652116	0.199568	2.04705e-13	1.10615e-11		Potri.003G167800	-1.29145	-1.34764	2.22808	2.0469	5.11083e-25	8.71538e-23
Potri.014G106000	-0.608993	-2.9188	0.112729	0.0888743	2.23534e-13	1.19676e-11		Potri.004G051900	2.92569	2.26003	9.28214	11.6045	6.65432e-25	1.11424e-22
Potri.006G065300	-3.29871	-2.33165	0.0854626	-0.519803	2.35834e-13	1.25878e-11		Potri.002G177900	-1.90297	-1.81921	1.4647	1.58496	9.97019e-25	1.63018e-22
Potri.008G189400	-3.10437	-3.67971	-0.114385	0.149991	2.47007e-13	1.31088e-11		Potri.005G176100	7.666	4.18902	4.24375	3.57176	1.16606e-24	1.86567e-22
Potri.016G039100	-3.41053	-5.3903	0.366425	0.060167	2.70413e-13	1.42424e-11		Potri.008G102600	-4.13464	-2.64671	-2.33237	3.86042	1.16789e-24	1.86567e-22
Potri.018G081700	-1.28741	-3.23862	0.527303	-0.442151	2.9246e-13	1.53456e-11		Potri.005G209100	-1.15343	-1.00065	5.05143	5.45352	1.20312e-24	1.91097e-22
Potri.015G083200	-2.62874	-2.01386	0.393515	0.420316	3.36942e-13	1.75474e-11		Potri.004G095200	6.66593	6.10508	3.99127	3.38234	4.57651e-24	6.95129e-22
Potri.T006000	-1.47009	-3.23997	-2.95873	0.760206	3.63341e-13	1.8887e-11		Potri.010G133300	5.54475	5.39941	11.2688	8.56911	4.69914e-24	7.09877e-22
Potri.018G042100	-2.05678	-0.301161	-2.83391	-2.08355	3.85393e-13	1.99588e-11		Potri.010G245300	-7.76335	-2.81913	1.28983	2.6204	7.36586e-24	1.08329e-21
Potri.012G005900	-3.14893	-0.0360883	-5.33129	-2.8422	4.23913e-13	2.18319e-11		Potri.001G154100	6.74292	3.77038	4.51942	5.17059	7.92803e-24	1.15983e-21
Potri.008G027600	-5.12781	-4.15036	-1.96815	-1.14747	4.3237e-13	2.22264e-11		Potri.017G154200	4.14561	2.06608	1.59182	1.83224	1.02899e-23	1.49747e-21
Potri.016G038600	-2.43397	-0.890567	-3.1993	-2.45879	4.86202e-13	2.472e-11		Potri.014G147900	1.7687	1.47153	-2.03303	-1.76391	1.61427e-23	2.30103e-21
Potri.007G121500	-2.87953	-1.88036	0.352086	-0.38374	6.52315e-13	3.23749e-11		Potri.007G146400	3.0786	1.09945	4.8063	3.53665	1.67149e-23	2.37045e-21
Potri.003G141800	-2.46589	-3.17752	0.0887521	-0.425516	6.53029e-13	3.23749e-11		Potri.005G145800	-2.51763	-5.18338	1.62853	1.62933	1.85367e-23	2.58917e-21
Potri.006G007500	-2.53314	-3.24706	-2.29044	-0.755404	6.68412e-13	3.302e-11		Potri.T170400	-2.97866	-4.95006	-5.28354	-4.69264	2.05862e-23	2.84684e-21
Potri.001G368000	-2.11494	-1.57582	0.908188	0.675319	7.49893e-13	3.64634e-11		Potri.T162900	5.25148	2.72391	1.85518	1.39526	2.1228e-23	2.92106e-21
Potri.012G094000	-3.5829	-0.0699929	-0.485715	-4.90571	7.6546e-13	3.71555e-11		Potri.014G159800	-4.80367	-5.74504	-4.0713	-4.97016	3.09192e-23	4.19234e-21
Potri.005G210700	-0.744803	0.379909	-3.13642	-0.14128	1.02714e-12	4.92566e-11		Potri.013G100700	-4.86659	-6.35009	2.75365	1.3934	4.65421e-23	6.21964e-21
Potri.004G102800	-4.89492	-0.89161	-3.06276	-1.5289	1.14297e-12	5.43438e-11		Potri.018G141700	-2.74071	-2.6459	2.53448	3.41745	5.1282e-23	6.78778e-21
Potri.006G127200	-1.01072	0.911575	-2.35514	-0.344708	1.27547e-12	6.00289e-11		Potri.001G105900	5.2389	3.73241	3.27912	3.64509	6.49876e-23	8.4411e-21
Potri.014G165500	-1.81416	-2.61006	0.0596208	-0.0111812	1.41048e-12	6.59378e-11		Potri.009G053300	-3.23334	-1.57907	1.44965	1.34052	1.13042e-22	1.42823e-20
Potri.015G073200	-0.0420291	0.954729	-2.64282	-0.108307	1.56617e-12	7.27275e-11		Potri.002G079500	6.35734	6.40347	3.60997	3.44188	1.53814e-22	1.91722e-20
Potri.008G153300	-3.77198	-1.96232	-3.67166	-1.53475	1.5833e-12	7.34008e-11		Potri.016G037600	-2.87368	-2.16991	1.07103	1.36312	1.68572e-22	2.0918e-20
Potri.009G131800	-4.09045	0.924259	-0.0383073	-1.7944	1.66493e-12	7.69291e-11		Potri.015G015800	7.46426	6.45942	4.98905	4.26342	2.21393e-22	2.69905e-20
Potri.019G093800	-2.1139	0.337732	-3.03433	-9.30159	2.00141e-12	9.15655e-11		Potri.015G126900	-3.24861	-3.68057	1.24409	2.57814	2.67129e-22	3.17313e-20
Potri.003G200600	-0.495236	-2.58691	0.305781	-0.0124214	2.24428e-12	1.02007e-10		Potri.001G403000	-1.03307	-2.81197	1.93952	1.28737	2.89389e-22	3.42291e-20
Potri.011G063800	-2.84155	-1.24163	0.0282787	0.601302	2.64214e-12	1.19119e-10		Potri.008G165400	-2.69021	-2.12802	2.05887	1.20399	2.98314e-22	3.51353e-20
Potri.008G088500	-1.6665	0.453599	-2.71262	-1.79951	2.71717e-12	1.22303e-10		Potri.006G065500	-3.74096	-4.98269	2.82417	3.97566	3.40171e-22	3.95623e-20
Potri.006G245300	-2.02695	-0.28581	-3.21647	-2.59868	2.79568e-12	1.25432e-10		Potri.001G148700	3.67468	1.36171	-1.10818	-1.50103	4.85465e-22	5.55308e-20
Potri.005G064300	-1.06886	-3.38273	0.457173	-1.01218	2.84315e-12	1.27152e-10		Potri.002G167300	-2.33404	-2.11315	1.83191	2.08123	5.20279e-22	5.92692e-20
Potri.010G086000	-2.59565	-2.0628	-1.68114	-4.7027	3.07363e-12	1.3702e-10		Potri.004G165300	-5.83374	-5.59559	-5.74163	-2.81663	5.70947e-22	6.47757e-20
Potri.010G211500	-0.910184	-1.82453	-2.93548	-4.46275	3.09351e-12	1.37686e-10		Potri.008G046200	-1.44298	-3.20959	-3.68231	-3.73617	5.75343e-22	6.50091e-20
Potri.005G170400	-0.150035	-0.134888	-3.28826	-0.699016	3.11021e-12	1.38209e-10		Potri.001G292100	-2.37924	-2.37924	6.28148	7.08945	8.10621e-22	8.83609e-20
Potri.009G118100	-1.86811	-2.52172	-0.524221	0.33106	3.12687e-12	1.38728e-10		Potri.002G192600	3.18364	3.15562	4.62896	5.88898	8.84674e-22	9.57088e-20
Potri.006G040900	-2.18986	-1.77226	0.516184	-0.436159	3.20351e-12	1.41677e-10		Potri.007G103500	6.48591	3.44742	3.25034	2.92323	9.61192e-22	1.02759e-19
Potri.006G134600	0.158052	0.983411	-1.76093	-2.76717	3.9511e-12	1.72819e-10		Potri.017G047800	3.87719	4.36575	4.56602	5.9751	1.02608e-21	1.09275e-19
Potri.002G083200	-1.1066	-2.82421	0.0723526	-0.132924	4.14684e-12	1.80812e-10		Potri.003G057400	-3.14166	-5.25423	3.94354	5.87471	1.04066e-21	1.10405e-19
Potri.003G121500	-3.24499	-1.81986	-0.877122	-2.44465	4.27229e-12	1.85991e-10		Potri.017G084000	-4.54375	-4.64772	-2.54152	-2.42653	1.22775e-21	1.29267e-19
Potri.004G155400	-5.50704	-4.65635	-3.23621	-0.798238	4.57716e-12	1.98026e-10		Potri.012G055100	-3.4593	-3.4984	-2.76508	-2.67921	1.56443e-21	1.62864e-19
Potri.004G096900	-7.96597	-3.45986	-3.04978	-1.0119	5.39139e-12	2.31813e-10		Potri.008G039600	-3.97724	-1.15237	1.40568	2.17821	1.85888e-21	1.90662e-19
Potri.008G159400	-0.825509	-2.701	0.332795	-0.171225	5.98744e-12	2.5614e-10		Potri.012G041800	-1.94754	-2.14664	1.82104	2.65168	2.29144e-21	2.3161e-19
Potri.016G017000	-2.2917	-4.11882	-0.207377	-0.135756	6.13201e-12	2.61238e-10		Potri.008G121700	-1.95518	2.11954	2.67308	3.77222	3.37975e-21	3.37927e-19
Potri.012G008700	-3.05231	-2.08452	-3.57869	-2.44861	6.26557e-12	2.66115e-10		Potri.001G414700	-1.72053	-2.33335	2.01483	1.63693	3.76251e-21	3.7351e-19
Potri.001G205800	-0.226548	-2.2777	0.832465	0.00839757	6.48529e-12	2.7461e-10		Potri.002G026100	4.19384	1.90229	8.43888	6.89875	4.43356e-21	4.32404e-19
Potri.001G149600	-0.623761	-0.304376	-3.53973	-0.814927	7.00885e-12	2.9588e-10		Potri.016G130700	7.23829	3.9989	5.18201	1.44392	4.88772e-21	4.75032e-19
Potri.011G006700	-1.45385	-3.15672	0.0961448	-0.288413	7.53797e-12	3.17735e-10		Potri.002G025400	4.63722	2.03398	8.92282	7.00499	4.99608e-21	4.83871e-19
Potri.017G039200	-1.70444	-2.20511	0.696446	0.314204	9.59943e-12	3.97414e-10		Potri.002G079700	9.37459	8.96446	4.61177	6.15335	6.78749e-21	6.5282e-19
Potri.001G289700	-0.989206	-1.94815	0.838704	-0.00821935	9.93387e-12	4.07026e-10		Potri.006G103900	4.42846	3.85867	4.64768	2.26808	7.60756e-21	7.24177e-19
Potri.017G084000	-3.72231	-5.14598	-1.28346	-2.79779	1.12989e-11	4.58908e-10		Potri.002G213100	5.54951	4.15193	7.82447	6.5552	7.68189e-21	7.28757e-19
Potri.001G249200	-0.648949	0.349133	-2.89619	-1.32362	1.22469e-11	4.94525e-10		Potri.003G150700	6.28467	4.2819	3.84076	2.39142	7.71509e-21	7.29417e-19
Potri.001G050800	-3.91296	-4.5606	0.19297	-2.07155	1.57968e-11	6.26965e-10		Potri.004G111100	9.77422	6.91211	7.6957	5.34206	1.1897e-20	1.11719e-18
Potri.009G087700	0.797649	0.380764	-2.01511	-2.37027	1.58948e-11	6.2996e-10		Potri.006G010000	-2.32791	-2.28189	-3.32217	-3.62655	1.33511e-20	1.24952e-18
Potri.001G459500	-1.8863	0.129891	-3.7012	-0.97829	1.81717e-11	7.12097e-10		Potri.007G030300	8.5038	9.15017	4.81438	6.24466	1.99761e-20	1.8386e-18
Potri.005G121900	-2.54742	-1.01257	-2.36189	-1.89422	1.91473e-11	7.49274e-10		Potri.008G006500	-2.47191	1.65621	-1.65211	-3.23295	2.23453e-20	2.04987e-18
Potri.004G096600	-8.27896	-2.16858	-1.03639	-0.129102	2.17579e-11	8.42957e-10		Potri.001G250100	-1.77297	-1.72177	-3.84946	-5.72185	2.76364e-20	2.51863e-18
Potri.002G185100	-1.56125	-2.92583	0.497008	-0.467234	2.17834e-11	8.42957e-10		Potri.012G126100	-2.02288	-1.76044	1.35504	1.46152	3.09897e-20	2.77867e-18
Potri.007G003600	-3.40678	-0.281776	0.867068	0.299479	2.96883e-11	1.12683e-09		Potri.008G094700	-1.84783	2.21136	-1.60988	-4.29635	3.40737e-20	3.03561e-18
Potri.007G131300	-1.73739	-2.19442	0.175774	-0.154742	3.23949e-11	1.22302e-09		Potri.005G036800	4.76088	4.57132	3.37303	4.31194	3.97774e-20	3.52118e-18
Potri.006G173300	-0.935487	-3.43894	0.382643	0.72138	4.08588e-11	1.52194e-09		Potri.010G237300	-2.5241	-2.67754	-4.64132	-3.92138	3.99879e-20	3.52859e-18
Potri.010G130800	-2.12897	-2.15055	0.291253	-0.501676	4.10532e-11	1.5251e-09		Potri.012G090500	4.69242	4.64672	2.37851	1.49767	4.35147e-20	3.81557e-18
Potri.009G010000	-3.75956	0.719843	-4.07378	-4.31375	4.11186e-11	1.52549e-09		Potri.011G165000	-4.10097	-1.46835	-2.65617	-2.21302	5.10012e-20	4.43009e-18
Potri.012G122800	-1.59027	0.589059	-3.14558	-1.18643	4.36672e-11	1.60933e-09		Potri.001G395100	6.54092	6.6185	2.2171	2.59191	7.67009e-20	6.53981e-18
Potri.007G044300	-0.489799	-2.53708	0.581856	0.0642813	4.6985e-11	1.72023e-09		Potri.004G165200	-7.26391	-7.13444	-9.37455	-2.45408	8.84226e-20	7.49327e-18
Potri.012G105000	-0.724871	-0.322994	-3.37217	-0.93758	6.28856e-11	2.26372e-09		Potri.007G011500	-2.45504	-2.57991	-2.67679	-3.13501	9.4091e-20	7.92531e-18
Potri.003G217000	-2.52663	-2.14435	-1.30707	-1.47	6.39002e-11	2.29727e-09		Potri.001G100000	-4.43657	-2.52681	1.15167	2.0757	1.06166e-19	8.88852e-18
Potri.017G039400	-2.27039	-3.95985	0.534129	0.559635	6.58366e-11	2.34871e-09		Potri.005G015300	8.16967	4.30162	2.4904	3.83314	1.08647e-19	9.06889e-18
Potri.005G232000	-1.3652	-0.478261	-3.44809	-0.895581	7.56991e-11	2.66978e-09		Potri.004G162600	-2.47311	-2.75872	2.85201	2.19767	1.32739e-19	1.10138e-17
Potri.004G085600	-1.95393	-1.54362	0.738395	-0.271242	8.29117e-11	2.89484e-09		Potri.016G125400	5.58256	2.62635	4.11616	3.88748	1.42376e-19	1.17432e-17
Potri.004G102100	-2.08872	-1.94451	0.060805	-0.628242	8.35586e-11	2.91378e-09		Potri.002G060100	-5.7719	-5.7719	2.85279	5.18832	1.48963e-19	1.22502e-17
Potri.010G172300	-3.26033	-2.46893	-1.12324	-1.49705	8.40608e-11	2.92763e-09		Potri.018G126900	-3.89186	-4.91408	-2.8709	-1.46966	1.56098e-19	1.27991e-17
Potri.013G065100	-6.79016	-4.91508	-6.79016	-3.35281	8.6699e-11	3.00823e-09		Potri.006G112500	4.38783	5.15151	4.2714	4.15848	2.9755e-19	2.38349e-17
Potri.007G072600	-1.767	0.0466214	-2.93149	-1.75689	9.33146e-11	3.21376e-09		Potri.001G082700	-2.92738	-1.41733	2.13711	3.21186	3.2533e-19	2.59852e-17
Potri.011G106300	-0.397555	-0.330706	-3.52118	-1.60746	9.90694e-11	3.39517e-09		Potri.013G148300	5.20507	-3.23421	1.06527	1.29221	4.0984e-19	3.22936e-17
Potri.017G148600	-1.34454	0.0358738	-2.46834	-1.35881	1.03035e-10	3.52673e-09		Potri.005G077200	-2.78321	-3.13874	-5.12371	-3.73639	4.60784e-19	3.60788e-17
Potri.010G153900	-0.480629	0.471932	-2.57203	-1.35989	1.05324e-10	3.59625e-09		Potri.019G005200	-2.89819	-1.17742	-4.90055	-4.81168	4.97714e-19	3.8752e-17
Potri.013G095500	-3.15998	-3.11836	-0.396308	-1.24546	1.05585e-10	3.60074e-09		Potri.005G206900	-10.5596	-7.49633	-7.74436	-4.97404	5.13162e-19	3.97321e-17
Potri.007G121100	-1.36014	-3.42749	0.79088	0.155339	1.10111e-10	3.74594e-09		Potri.016G131600	8.62618	5.41588	6.12298	3.29388	7.25084e-19	5.53693e-17
Potri.001G250100	0.713789	0.492446	-3.11239	-1.0723	1.1348e-10	3.85583e-09		Potri.010G151900	-8.48692	-5.40889	-4.18509	-4.26231	8.47782e-19	6.42097e-17
Potri.001G103300	-2.70168	-0.33966	-3.49077	-1.14865	1.1651e-10	3.93957e-09		Potri.017G108300	-7.5654	-3.02965	1.08779	1.18265	9.13228e-19	6.87916e-17
Potri.002G122900	0.194094	-1.13076	-2.66314	0.886319	1.19453e-10	4.0293e-09		Potri.008G022200	-4.73137	-1.57968	-3.19363	-2.55778	1.22613e-18	9.04017e-17
Potri.001G394400	-1.45054	-1.7708	0.649547	0.0280477	1.28518e-10	4.2935e-09		Potri.005G109200	5.60178	4.25963	3.83298	3.02359	1.48794e-18	1.08839e-16
Potri.009G074600	-2.61012	-3.00373	0.710948	0.954767	1.31522e-10	4.38858e-09		Potri.009G154500	6.45532	6.31259	3.71891	2.78925	1.80407e-18	1.29728e-16
Potri.002G010100	-2.87963	-2.55609	-3.35479	-1.04352	1.3184e-10	4.39393e-09		Potri.012G136800	-5.05244	-5.25139	-8.87219	-2.38023	1.99518e-18	1.42565e-16
Potri.009G077900	-2.28128	-2.07173	0.0569224	-0.599359	1.36296e-10	4.53159e-09		Potri.002G169800	1.04834	1.59418	-1.63093	-1.28475	2.4612e-18	1.74519e-16
Potri.006G237200	-3.18996	-1.76323	0.920454	0.0336476	1.37747e-10	4.57438e-09		Potri.008G179500	-8.1058	-5.73066	-4.3937	-2.65673	2.86486e-18	2.00584e-16
Potri.015G103700	-2.08715	0.0422861	-2.64131	-1.24456	1.38687e-10	4.60013e-09		Potri.008G149600	-3.91545	-1.73332	2.89698	3.38722	3.06199e-18	2.13311e-16
Potri.019G093400	-3.44477	-1.87101	-0.173571	-0.335354	1.47362e-10	4.87625e-09		Potri.014G171300	5.49197	6.42898	4.85052	5.37782	3.10498e-18	2.15765e-16
Potri.001G287500	-3.63916	-0.462662	-2.13537	-1.06729	1.57504e-10	5.15672e-09		Potri.018G088600	-4.92602	-2.88635	-4.39431	-3.97566	3.41219e-18	2.35348e-16
Potri.001G393700	-2.65327	-0.204734	-0.731649	-1.6676	1.68245e-10	5.48905e-09		Potri.016G098600	2.93748	2.25675	6.61599	9.09337	4.73013e-18	3.21464e-16
Potri.002G083300	-1.97612	-3.02848	0.0393701	-0.881917	1.74882e-10	5.67897e-09		Potri.008G115900	-2.33071	-5.23782	3.54982	6.3175	6.58541e-18	4.4002e-16
Potri.011G114300	-0.691555	-1.97683	0.703525	0.545647	1.75354e-10	5.68766e-09		Potri.002G233400	6.4953	8.77215	5.90601	3.83051	7.17004e-18	4.71155e-16
Potri.002G175600	-2.59047	-3.1467	0.327443	-0.729011	1.99085e-10	6.42748e-09		Potri.013G144300	-3.49766	-2.97403	-2.37465	-2.04108	7.29603e-18	4.78303e-16
Potri.012G031100	-0.557467	-2.78961	0.798259	0.246883	2.05878e-10	6.60108e-09		Potri.002G150400	-3.93304	-4.43966	1.81668	2.26522	7.78607e-18	5.09228e-16
Potri.002G022600	-2.06332	-2.42526	-1.49746	-5.22665	2.08036e-10	6.64713e-09		Potri.003G103900	5.55291	4.19544	2.54968	3.17144	8.7956e-18	5.72558e-16
Potri.019G010600	-4.10271	-2.06702	-3.22825	-1.46253	2.18525e-10	6.9504e-09		Potri.018G126400	-1.16679	-4.04269	-5.26905	-4.38944	1.01661e-17	6.54115e-16
Potri.011G105400	-0.252842	0.296105	-2.74824	-0.404286	2.20895e-10	7.01777e-09		Potri.012G055700	-2.76084	-3.23858	2.30162	1.13623	1.063e-17	6.8238e-16
Potri.004G050700	-1.49784	-0.0432925	-2.77243	-3.39491	2.43121e-10	7.71509e-09		Potri.T160800	5.67887	3.24708	4.16275	3.38307	1.16954e-17	7.47322e-16
Potri.001G011700	-1.9459	-1.65467	-2.55735	-1.65534	2.55116e-10	8.05555e-09		Potri.013G159000	-1.77954	-1.60659	1.27859	1.07727	1.17779e-17	7.50866e-16
Potri.010G027800	-2.1259	-1.56669	0.870067	0.128084	2.98106e-10	9.31146e-09		Potri.010G097700	3.81162	1.40305	1.93106	1.24157	1.43949e-17	9.03205e-16
Potri.017G141600	0.130794	0.348146	-5.77148	0.81312	3.08916e-10	9.62752e-09		Potri.008G060200	-4.79643	-6.36801	-4.14953	-3.29885	1.80289e-17	1.1211e-15
Potri.008G130000	-1.84513	-3.53746	0.846937	0.0839291	3.79968e-10	1.16593e-08		Potri.018G078800	4.48027	4.98619	3.41915	3.67574	1.95314e-17	1.21182e-15
Potri.011G165000	-4.5668	-2.08175	-0.387351	-0.87453	3.90957e-10	1.19702e-08		Potri.011G061700	5.46095	4.74478	2.95282	2.88912	1.9701e-17	1.21962e-15
Potri.005G178300	-0.734657	-2.49582	0.0704099	0.0982352	3.96213e-10	1.21045e-08		Potri.002G190800	9.35879	9.5839	7.31926	5.20736	2.00601e-17	1.23909e-15
Potri.012G078500	-2.56051	-0.514368	-3.1846	-2.61139	4.10831e-10	1.25068e-08		Potri.009G101900	1.5656	2.19688	4.01811	5.15922	2.28293e-17	1.39464e-15
Potri.014G159800	-4.795	-2.3169	-4.51402	-2.01308	4.11176e-10	1.25068e-08		Potri.014G126900	-2.60897	-2.71655	4.16447	6.50667	3.76508e-17	2.22196e-15
Potri.019G130100	-2.48438	-0.366901	-5.00138	-1.7008	4.55215e-10	1.36968e-08		Potri.019G131600	-1.99465	-1.60926	1.28488	1.3128	3.83712e-17	2.2549e-15
Potri.017G090300	-0.285553	-2.19709	0.517629	0.384803	4.57874e-10	1.37619e-08		Potri.006G055600	10.7087	7.17084	7.34029	5.98681	4.27165e-17	2.49443e-15
Potri.005G171200	-4.87209	-1.78935	-2.50529	-1.92109	4.58698e-10	1.37718e-08		Potri.001G389400	-2.803	-2.61784	2.83962	1.90869	4.37201e-17	2.54768e-15
Potri.009G160500	-0.608201	0.137733	-2.57574	-1.17925	5.13907e-10	1.53139e-08		Potri.015G002300	-1.23023	-2.68963	-3.63086	-4.36651	4.43187e-17	2.57716e-15
Potri.015G030400	-1.01747	-2.67133	0.81858	0.294713	5.26932e-10	1.56852e-08		Potri.002G078600	-2.12869	3.20723	-2.10929	-3.74111	4.51922e-17	2.62247e-15
Potri.007G099800	-0.283476	0.156166	-2.05981	-3.21919	5.72604e-10	1.69362e-08		Potri.004G061300	8.59274	7.20364	6.01641	4.21906	4.71121e-17	2.72818e-15
Potri.002G158400	-1.28651	0.63903	-2.97872	-3.92839	5.79043e-10	1.70904e-08		Potri.010G054100	6.73905	8.61471	5.24941	4.21885	4.77145e-17	2.75732e-15
Potri.008G145500	-0.177335	-3.02952	-0.436168	0.113296	6.42027e-10	1.87808e-08		Potri.008G209800	5.8295	4.4176	1.27316	1.46166	4.8585e-17	2.796e-15
Potri.008G017700	-3.46131	-1.66658	-2.79132	-3.04678	6.42987e-10	1.87808e-08		Potri.T137400	1.30043	1.87584	-1.55106	-1.51668	5.94648e-17	3.40099e-15
Potri.007G021400	-2.60666	-1.7742	0.3588	0.491654	6.43058e-10	1.87808e-08		Potri.001G142500	4.06046	1.09657	1.68344	1.74955	6.87646e-17	3.92481e-15
Potri.009G075400	0.0800308	-0.235398	0.0105583	-3.47023	6.83747e-10	1.98858e-08		Potri.002G105000	9.75224	6.43459	5.86426	7.67746	1.04591e-16	5.84953e-15
Potri.001G059500	-1.03881	-1.7783	0.897901	0.237229	7.0744e-10	2.0532e-08		Potri.007G107200	-1.12216	1.29897	-2.66761	-2.58765	1.08273e-16	6.0433e-15
Potri.002G093900	-0.53276	0.527974	-3.67297	-2.02873	7.12416e-10	2.06549e-08		Potri.006G177700	-2.42419	-4.34346	2.42149	3.01823	1.12375e-16	6.23468e-15
Potri.001G140700	-2.61749	-1.13354	-2.15035	-0.924123	7.38025e-10	2.13529e-08		Potri.013G104300	-1.12715	-2.85608	-2.25556	-3.14581	1.22248e-16	6.75546e-15
Potri.008G022100	-1.67597	-2.21547	-3.12361	-2.88139	7.84024e-10	2.25433e-08		Potri.015G039000	-6.68855	-9.59637	-2.23636	1.97526	1.33222e-16	7.31824e-15
Potri.008G074300	-2.01235	-2.50289	0.596087	0.42373	8.16567e-10	2.33825e-08		Potri.009G118100	-3.02748	-3.63915	-2.36271	-1.73323	1.42384e-16	7.79077e-15
Potri.007G003500	-2.6511	-1.62337	-1.16372	-0.670601	8.30561e-10	2.37345e-08		Potri.011G016600	3.93631	3.78892	-3.76601	-1.32814	1.56521e-16	8.51398e-15
Potri.011G081000	-5.18576	-0.419247	0.881609	0.472809	8.37993e-10	2.39223e-08		Potri.010G135200	-4.71505	-4.71505	3.48001	3.0356	1.87428e-16	1.0038e-14
Potri.017G115000	-3.15703	-3.43122	-3.55249	-1.24506	8.53778e-10	2.42982e-08		Potri.014G083900	-2.83524	-2.67633	1.19818	3.57335	2.0977e-16	1.11274e-14
Potri.008G162500	-1.5173	-2.08776	0.510379	0.251788	8.97978e-10	2.5504e-08		Potri.008G073400	9.50934	7.39642	6.25017	6.32141	2.24654e-16	1.18597e-14
Potri.010G245300	-1.1418	-3.65356	0.938852	-0.51646	9.99001e-10	2.8258e-08		Potri.003G059700	3.143	2.03977	-1.49965	-1.92527	2.46238e-16	1.29384e-14
Potri.001G253300	-2.39401	-1.21738	0.475013	-0.244686	1.00714e-09	2.84593e-08		Potri.005G121900	-3.88626	-2.47705	-1.47554	-1.44572	2.62988e-16	1.37665e-14
Potri.005G121800	-3.18578	-0.598615	-1.96755	-2.46824	1.00927e-09	2.84907e-08		Potri.011G006700	-3.61976	-2.96871	-2.02835	-1.67576	2.74759e-16	1.43556e-14
Potri.008G171000	0.625622	-2.80307	0.0279285	-0.109984	1.07519e-09	3.0168e-08		Potri.017G115000	-4.63609	-6.51359	-8.76948	-3.02803	2.79069e-16	1.45018e-14
Potri.001G331900	-1.15691	-0.518972	-2.83863	-0.683857	1.10874e-09	3.10469e-08		Potri.011G110000	9.13785	5.73208	4.30392	7.20892	2.81906e-16	1.46192e-14
Potri.019G131000	-1.04901	-0.452519	-3.26934	-1.41267	1.19938e-09	3.34505e-08		Potri.006G008500	4.63542	2.96979	2.07079	1.00716	2.88522e-16	1.49344e-14
Potri.001G458200	0.476305	0.51256	-2.60866	0.245283	1.21133e-09	3.37501e-08		Potri.005G006300	6.05128	7.16477	3.71815	2.79464	3.02114e-16	1.55223e-14
Potri.006G058000	-2.43228	-2.99062	0.588807	0.370734	1.22199e-09	3.39792e-08		Potri.014G138100	1.168	1.72596	-2.32475	-1.84997	4.85894e-16	2.43789e-14
Potri.016G079600	-0.847171	-2.67404	0.427752	0.31525	1.42071e-09	3.93088e-08		Potri.008G130800	-2.37722	-2.37722	4.94654	6.69004	5.08761e-16	2.54802e-14
Potri.015G142700	-3.1151	-1.47613	-1.34123	-1.78786	1.42281e-09	3.93277e-08		Potri.012G075800	5.71479	6.2667	4.52523	3.65305	5.90616e-16	2.92113e-14
Potri.011G150700	-2.57978	-0.604266	-2.38293	-1.09376	1.44633e-09	3.99382e-08		Potri.T107500	6.09415	3.02563	1.51673	4.93758	6.34063e-16	3.11937e-14
Potri.012G102200	-4.46293	-1.30232	-1.29608	-1.53288	1.49398e-09	4.11317e-08		Potri.006G183200	5.4315	2.30355	2.68935	3.43108	6.57405e-16	3.22279e-14
Potri.009G135200	-1.17392	0.207104	-3.49027	-0.858238	1.50827e-09	4.14843e-08		Potri.001G119300	-4.00886	-2.28175	-2.66753	-2.40973	6.79432e-16	3.31907e-14
Potri.014G138100	0.874097	0.909711	-1.90805	-0.192059	1.62202e-09	4.44811e-08		Potri.005G210100	2.11305	4.54396	2.50051	9.17796	7.7223e-16	3.75261e-14
Potri.015G079000	-3.38409	-0.995955	-0.397198	-0.636931	1.66386e-09	4.55388e-08		Potri.012G095800	-1.17786	-1.3028	-3.3151	-3.06683	8.32275e-16	4.0303e-14
Potri.001G379000	-1.43042	-2.6864	0.134642	0.119934	2.02035e-09	5.444e-08		Potri.T171300	-4.18703	-2.08808	-2.06375	-2.46019	9.92552e-16	4.76494e-14
Potri.010G151600	0.239335	-0.519685	-2.48099	-0.435739	2.11967e-09	5.68416e-08		Potri.016G124900	1.56726	-1.18926	4.22168	1.60427	1.07435e-15	5.12096e-14
Potri.017G009600	-3.51902	-1.457	-0.678726	0.0784781	2.15429e-09	5.77142e-08		Potri.015G016500	-2.13922	-3.08403	-2.99518	-3.5406	1.07593e-15	5.12096e-14
Potri.013G156000	-1.74706	-2.59762	0.244119	-0.00367097	2.18822e-09	5.85669e-08		Potri.012G133000	-4.42753	-2.77638	-3.99622	-2.30832	1.13642e-15	5.39965e-14
Potri.005G017300	-2.13759	-3.20688	0.994887	0.808583	2.36741e-09	6.30599e-08		Potri.011G110500	8.88734	5.86706	3.36542	6.49046	1.2271e-15	5.81062e-14
Potri.007G142400	-0.428085	-0.418645	-2.68215	-0.0457397	2.39684e-09	6.37221e-08		Potri.008G099100	-2.11104	2.14628	1.93729	1.22947	1.26887e-15	5.97789e-14
Potri.009G033900	-2.54629	-1.38611	-3.29268	-5.99803	2.47457e-09	6.56634e-08		Potri.001G088900	-2.11388	-1.34552	1.85956	2.91433	1.37377e-15	6.4177e-14
Potri.012G108700	-7.39988	0.569644	-1.50687	-0.71414	2.56922e-09	6.79162e-08		Potri.003G121400	5.88442	5.71672	3.00613	2.13989	1.39144e-15	6.48935e-14
Potri.004G058100	-3.98028	-0.704527	-0.325253	-0.959543	2.67447e-09	7.0431e-08		Potri.018G088500	-5.08422	-3.1997	-4.93939	-3.56458	1.44241e-15	6.71578e-14
Potri.016G120100	-0.364765	-0.266777	-2.98828	-0.406987	2.79145e-09	7.33037e-08		Potri.008G100500	-1.20998	-3.10927	5.18078	8.52941	1.53806e-15	7.14332e-14
Potri.013G001000	-1.98838	0.704524	-2.83772	-5.55426	2.88226e-09	7.55461e-08		Potri.004G224500	-2.74718	1.03602	2.75095	2.76537	1.85474e-15	8.54965e-14
Potri.015G128800	-0.694837	0.555483	-2.64102	-1.84973	2.95336e-09	7.72644e-08		Potri.012G097900	-2.69418	1.09789	1.98415	1.05736	1.88173e-15	8.6597e-14
Potri.014G096800	-1.44386	-0.660506	-3.63651	-1.05489	3.07676e-09	8.01164e-08		Potri.004G199300	4.67983	5.72203	4.02703	3.50545	2.05633e-15	9.41645e-14
Potri.014G017200	-0.00681848	0.385609	-2.29848	-0.336653	3.30257e-09	8.52791e-08		Potri.006G202600	4.47622	5.05273	5.2779	4.78985	2.31378e-15	1.05606e-13
Potri.002G156700	-2.65096	-1.29365	0.726955	-0.291558	3.53934e-09	9.09716e-08		Potri.018G036400	-2.62603	-1.89048	1.08752	3.75168	2.50582e-15	1.13624e-13
Potri.017G148700	-1.86159	-0.542437	-2.63367	-1.2886	3.5646e-09	9.15364e-08		Potri.005G096600	-1.50745	1.34471	-3.39583	-5.13783	2.6442e-15	1.19704e-13
Potri.001G134000	-1.23042	-1.69736	0.523509	-0.233363	3.83306e-09	9.77274e-08		Potri.016G133900	-1.36786	-1.80557	1.37925	1.88689	2.84479e-15	1.28367e-13
Potri.008G077400	-1.23261	-2.35564	-0.112171	-0.461723	3.99783e-09	1.01538e-07		Potri.T124000	3.95134	2.92938	2.32811	1.5673	2.91795e-15	1.31242e-13
Potri.007G050600	-2.1564	-1.83664	-1.60835	-1.90794	4.00156e-09	1.01541e-07		Potri.006G137800	-4.6959	-5.01592	2.47317	5.50997	3.08581e-15	1.38567e-13
Potri.001G107300	-0.153882	0.0415556	-2.91204	-0.531849	4.07269e-09	1.03158e-07		Potri.001G293400	-2.05632	-1.55724	1.3399	1.12647	3.35179e-15	1.49545e-13
Potri.014G042600	-1.35785	-2.25165	0.175806	-0.279066	4.16169e-09	1.05316e-07		Potri.019G098000	-4.03843	-4.16173	-2.04	-1.08214	3.64366e-15	1.62047e-13
Potri.004G165300	-1.84326	-1.78372	-2.95972	-4.45025	4.2002e-09	1.05895e-07		Potri.003G196000	-3.90925	-2.40722	1.77016	2.86839	3.65669e-15	1.62366e-13
Potri.019G023700	-1.14475	0.849173	-2.60534	-1.13844	4.20836e-09	1.05895e-07		Potri.014G022900	6.27646	6.91781	4.25989	4.1611	3.70813e-15	1.64388e-13
Potri.006G251700	-0.843174	0.164662	-2.87331	-0.632072	4.24684e-09	1.06696e-07		Potri.009G070200	-4.81601	-2.49945	1.97894	1.87454	4.34264e-15	1.91296e-13
Potri.006G245900	-4.15886	-0.492897	-3.50323	-0.264512	4.5159e-09	1.12744e-07		Potri.003G071000	6.44507	4.73552	5.20528	2.962	4.46332e-15	1.95991e-13
Potri.008G123300	-2.2476	-2.31853	-1.56843	-1.65565	4.88853e-09	1.21829e-07		Potri.001G270600	7.55484	8.51828	7.38406	6.02673	5.32793e-15	2.32124e-13
Potri.006G083900	-1.06788	-2.54015	0.299563	0.152253	5.13245e-09	1.26999e-07		Potri.012G091700	-3.47127	-2.9355	-1.58109	-1.66052	5.84024e-15	2.54046e-13
Potri.004G046700	-1.69031	-3.22856	-1.3996	-0.679254	5.41793e-09	1.33352e-07		Potri.014G034900	6.44641	7.36304	5.00528	4.741	6.17999e-15	2.67569e-13
Potri.018G143600	-1.45472	-2.26419	0.442109	0.953083	5.54805e-09	1.36314e-07		Potri.015G099500	-3.62244	-1.76632	1.12755	3.64709	6.49354e-15	2.80271e-13
Potri.004G138000	-0.409943	-2.4284	0.873152	0.428453	5.69549e-09	1.3969e-07		Potri.005G006000	6.70351	6.5522	4.85091	3.37869	6.64461e-15	2.85904e-13
Potri.001G173700	0.00108044	-0.891601	-2.64883	0.463429	5.72626e-09	1.40198e-07		Potri.019G099500	6.93722	6.17592	2.34124	2.19001	7.97834e-15	3.39092e-13
Potri.016G006800	-0.964909	0.0461887	-3.46186	-0.925286	5.77373e-09	1.40988e-07		Potri.005G171200	-4.25904	-2.87858	-2.28374	-3.12156	8.08553e-15	3.43123e-13
Potri.001G255700	-4.13738	-2.17094	-0.795204	-0.850568	5.82419e-09	1.41972e-07		Potri.005G223100	6.48429	6.46624	9.01519	7.7282	8.64258e-15	3.6509e-13
Potri.013G025900	-2.58178	-1.90214	-0.524492	-0.420762	6.32333e-09	1.53467e-07		Potri.017G114500	5.8599	2.75896	4.70141	3.99502	8.89489e-15	3.75178e-13
Potri.012G133000	-2.95823	-1.78895	-1.17219	-1.83628	6.47938e-09	1.57118e-07		Potri.001G048900	7.11008	6.07923	4.52499	4.36902	9.14397e-15	3.84517e-13
Potri.014G038800	0.750174	0.508089	-2.69669	-0.404338	6.48879e-09	1.57209e-07		Potri.002G102200	-3.74305	-5.16739	-2.03604	-3.18658	9.67328e-15	4.06161e-13
Potri.017G076400	-2.31076	-2.12407	-0.505026	-1.25861	6.7649e-09	1.63472e-07		Potri.016G052500	5.74541	8.3584	2.49388	8.30913	9.75083e-15	4.088e-13
Potri.005G077200	-1.23535	-2.47388	-2.4579	-2.39106	6.80999e-09	1.64419e-07		Potri.008G210900	5.09791	4.00241	6.17525	5.40635	1.15809e-14	4.79021e-13
Potri.008G087800	-0.863268	-2.28885	0.331878	-0.0385374	7.32283e-09	1.75132e-07		Potri.005G257200	11.2328	7.55494	9.85805	9.32377	1.2141e-14	4.98482e-13
Potri.001G073100	-2.16125	-0.639114	0.710548	0.146214	7.36768e-09	1.76053e-07		Potri.016G068600	7.5939	7.35832	6.91912	5.16854	1.23837e-14	5.07696e-13
Potri.010G203700	-0.872603	-0.0508595	-3.0215	-1.15506	7.42294e-09	1.77222e-07		Potri.007G003800	-1.2243	1.24371	2.82202	3.77674	1.29351e-14	5.28741e-13
Potri.016G054400	-0.74088	-2.40014	0.885485	0.565855	7.71776e-09	1.83945e-07		Potri.001G011700	-2.38977	-1.58804	-2.41693	-3.15173	1.30107e-14	5.31049e-13
Potri.014G035000	-0.954988	0.832672	-0.172677	-3.37001	7.76646e-09	1.84948e-07		Potri.018G131500	-5.28678	-1.49318	-3.25455	-3.75654	1.32285e-14	5.39148e-13
Potri.004G134500	0.240608	0.353589	-2.02198	-0.521973	8.29094e-09	1.96598e-07		Potri.005G222300	-4.75077	-2.71948	-3.17275	-2.50824	1.35648e-14	5.51237e-13
Potri.001G128200	-1.64494	-2.00236	-0.939081	0.222639	8.59459e-09	2.03106e-07		Potri.010G060300	5.13406	5.73161	4.35314	3.24663	1.45002e-14	5.8278e-13
Potri.015G143200	-2.79681	-3.39388	-0.279972	-0.267694	8.74205e-09	2.05893e-07		Potri.014G108100	3.05553	3.51628	1.77233	1.93304	1.48505e-14	5.95648e-13
Potri.001G359500	0.0742345	0.71027	-1.94962	-0.214331	9.01412e-09	2.11942e-07		Potri.006G179700	-2.37068	-2.37068	5.31583	8.17872	1.7346e-14	6.90759e-13
Potri.017G009400	-5.18326	-2.8881	-3.86562	-0.682747	9.50986e-09	2.22659e-07		Potri.010G132500	3.3982	5.12031	2.02705	1.72761	1.7727e-14	7.04921e-13
Potri.018G089100	-4.24811	-4.90221	-0.788772	0.147439	9.5991e-09	2.24371e-07		Potri.019G101400	-3.13316	1.63223	3.12123	3.59761	1.81385e-14	7.20255e-13
Potri.007G079200	2.68886e-05	0.858213	-2.25511	-0.769688	1.02115e-08	2.367e-07		Potri.011G060300	-4.48039	-4.35562	2.3215	3.57275	2.02007e-14	7.97582e-13
Potri.009G124100	-0.578831	-1.97618	0.672538	0.695234	1.03598e-08	2.39539e-07		Potri.006G152200	4.83632	4.27526	2.9712	1.62133	2.32424e-14	9.03559e-13
Potri.005G079400	-8.40963	-1.25885	-8.40963	-2.12882	1.03888e-08	2.39811e-07		Potri.005G248900	6.17606	5.15069	5.11157	3.1827	2.42226e-14	9.36426e-13
Potri.007G035900	-0.791079	0.57745	-2.70384	-1.55459	1.07783e-08	2.48186e-07		Potri.015G012400	-1.13007	-1.6953	-2.67428	-2.65722	2.5624e-14	9.83762e-13
Potri.009G006600	-5.69941	-2.53228	-1.98039	0.830902	1.08685e-08	2.49644e-07		Potri.004G060400	9.05888	4.53451	3.89791	5.74316	2.68044e-14	1.02625e-12
Potri.017G116000	-0.578603	0.285365	-2.49768	-3.0057	1.16241e-08	2.65687e-07		Potri.007G134800	3.8306	3.56716	2.91775	3.21696	2.91776e-14	1.10947e-12
Potri.003G126100	-0.883335	0.127683	-2.1553	-0.879463	1.16482e-08	2.66018e-07		Potri.001G235700	3.81044	1.52963	2.37808	1.75385	3.14301e-14	1.19023e-12
Potri.001G468500	-4.06304	-1.43877	-0.140908	-0.807792	1.18045e-08	2.68708e-07		Potri.001G300800	9.52955	7.32167	5.45229	7.4796	3.17834e-14	1.20034e-12
Potri.009G092100	-1.30981	-0.207505	-2.95857	-1.2879	1.20978e-08	2.74486e-07		Potri.011G120300	1.20045	4.10323	1.01754	-3.07768	3.19313e-14	1.20429e-12
Potri.002G021800	-0.689655	0.592786	-1.99891	-2.36272	1.21555e-08	2.75571e-07		Potri.012G049600	7.04408	5.87651	4.19481	6.75041	3.46557e-14	1.29649e-12
Potri.002G064400	-0.00314549	0.172263	-2.61684	-0.907551	1.21966e-08	2.76279e-07		Potri.018G032200	4.53508	3.52904	2.5731	3.38122	3.58473e-14	1.3384e-12
Potri.007G014200	-2.38884	0.968553	0.203196	0.00820644	1.22264e-08	2.76728e-07		Potri.006G158900	9.65015	5.11665	4.79642	6.8895	3.90393e-14	1.45072e-12
Potri.014G139300	-2.02352	-2.26209	-1.64206	0.537548	1.30885e-08	2.9528e-07		Potri.002G260300	-1.14159	1.00365	2.59979	1.4369	4.71212e-14	1.7234e-12
Potri.002G158200	-1.40632	0.573402	-1.61225	-0.0403471	1.36967e-08	3.08252e-07		Potri.018G020800	-1.86839	-3.33016	-2.45208	-2.60356	5.00591e-14	1.81888e-12
Potri.005G070400	-0.245754	-0.439337	-2.31481	-1.77233	1.37704e-08	3.09292e-07		Potri.019G064600	6.44525	4.40373	6.4527	4.85847	5.07149e-14	1.8403e-12
Potri.016G136600	-1.24653	-1.02097	-2.55633	-1.01571	1.37762e-08	3.09292e-07		Potri.012G083300	-1.30546	-2.55392	1.15335	1.19424	5.97814e-14	2.15803e-12
Potri.005G003600	0.045974	-2.05353	0.638373	-0.36981	1.37975e-08	3.09522e-07		Potri.005G135300	8.06964	9.44172	6.82974	6.15068	6.06347e-14	2.186e-12
Potri.011G165800	-3.73399	-2.53518	-0.64357	-0.551052	1.3966e-08	3.1305e-07		Potri.016G006200	-1.09367	2.26263	-1.32687	-5.28707	6.21629e-14	2.23819e-12
Potri.013G104300	-0.496193	-0.833144	-2.67976	-1.19526	1.40036e-08	3.1364e-07		Potri.008G010400	-3.32862	-1.32296	-1.47242	-1.67906	6.83276e-14	2.44747e-12
Potri.008G120000	-0.122422	0.971783	-4.08267	-5.60998	1.40156e-08	3.13657e-07		Potri.005G085200	5.34923	5.94572	4.93956	3.02629	7.30932e-14	2.6148e-12
Potri.006G133000	-0.956574	-2.15833	0.506626	-0.0903457	1.42458e-08	3.18298e-07		Potri.006G138800	3.58927	4.11964	2.93722	5.08749	7.39803e-14	2.64313e-12
Potri.001G242600	-1.33111	-1.20749	-2.51251	-1.89585	1.48454e-08	3.30106e-07		Potri.010G168300	1.1133	1.87687	1.55266	3.99016	7.61291e-14	2.71293e-12
Potri.019G116600	-3.09018	-1.81364	-3.20321	-2.41637	1.5467e-08	3.41474e-07		Potri.010G195200	9.41302	6.82254	7.2696	7.38513	7.75402e-14	2.75968e-12
Potri.001G122600	-1.36476	-2.28205	0.300171	-3.87266	1.55668e-08	3.42592e-07		Potri.002G150200	-4.14604	-1.89185	2.32025	3.82017	8.22645e-14	2.90919e-12
Potri.019G115900	-1.28173	-2.21153	0.325526	-0.613982	1.66073e-08	3.63629e-07		Potri.001G284500	-3.89153	-3.69915	-3.59513	-3.6491	8.59301e-14	3.02343e-12
Potri.008G186600	-1.56993	-2.13905	0.0823223	-0.0426322	1.72895e-08	3.77448e-07		Potri.013G101000	-7.82338	-9.73794	-3.96929	-1.61008	9.57999e-14	3.33691e-12
Potri.001G365500	-1.21685	-1.23572	0.913278	0.47785	1.83327e-08	3.99051e-07		Potri.019G028500	-8.13484	-7.98686	-4.32682	-7.80933	1.04791e-13	3.6364e-12
Potri.001G405900	-8.0282	0.474083	-1.25771	-0.10628	1.86315e-08	4.05239e-07		Potri.018G114800	7.54788	5.00706	5.34013	8.09089	1.06524e-13	3.69195e-12
Potri.T171300	-1.93357	-2.25747	-1.82304	-0.836289	1.88638e-08	4.09014e-07		Potri.004G159800	-1.02556	-2.03784	1.24257	1.80788	1.19462e-13	4.10961e-12
Potri.002G057600	0.182926	-1.05164	-2.33166	-0.318388	1.90117e-08	4.10949e-07		Potri.016G069400	3.41529	3.01927	5.5655	5.34403	1.21569e-13	4.17178e-12
Potri.001G306300	-3.10134	-2.60169	-1.23124	0.398332	1.93617e-08	4.18183e-07		Potri.004G186000	-2.62705	-3.72773	-4.38216	-4.45037	1.28548e-13	4.40582e-12
Potri.017G112700	-1.93179	-1.79501	-0.164609	-0.997009	1.96275e-08	4.23267e-07		Potri.008G017700	-4.6256	-3.62284	-1.04821	-2.68565	1.32256e-13	4.52734e-12
Potri.010G165800	-6.20661	-3.14589	-1.66879	-1.36911	1.98736e-08	4.27582e-07		Potri.011G061000	-1.43042	-2.15906	2.97106	4.21705	1.36453e-13	4.6538e-12
Potri.008G058500	-1.51475	-1.92602	0.331019	-0.0736509	2.00166e-08	4.30327e-07		Potri.015G085000	1.22863	1.59093	-1.10651	-1.28112	1.37856e-13	4.69588e-12
Potri.008G187400	-1.35317	-1.45314	0.608073	-0.248464	2.02494e-08	4.34996e-07		Potri.002G093900	-2.2373	-3.44258	-3.2806	-3.07096	1.4545e-13	4.93641e-12
Potri.001G238300	-2.8156	0.0429002	-2.91888	-2.9032	2.08275e-08	4.46726e-07		Potri.010G060100	3.94349	4.25421	2.3049	1.38536	1.4696e-13	4.98155e-12
Potri.010G215200	0.303341	-0.0460328	-2.86153	-0.831236	2.1455e-08	4.59476e-07		Potri.006G105500	3.12551	1.87437	4.68599	5.24221	1.48999e-13	5.03229e-12
Potri.019G120300	0.310404	0.66729	-2.62142	-0.426695	2.29478e-08	4.88071e-07		Potri.006G258700	-3.9387	-2.50549	1.64014	3.50478	1.54242e-13	5.19674e-12
Potri.001G438500	-0.686087	0.0582241	-2.54677	-0.537674	2.36382e-08	5.01224e-07		Potri.006G166800	-1.80242	-4.10813	-1.12075	1.92663	1.71961e-13	5.75884e-12
Potri.003G219000	-0.643927	-1.29944	0.943856	0.491346	2.49307e-08	5.25033e-07		Potri.004G065500	6.01605	3.01052	2.22324	4.16362	2.05833e-13	6.8437e-12
Potri.011G112700	-1.59384	-1.00299	0.687923	0.331821	2.58657e-08	5.43491e-07		Potri.009G057200	-1.48928	-1.70455	-3.41323	-2.80942	2.11571e-13	6.99267e-12
Potri.004G223800	0.911091	-0.294175	-1.73483	-0.0742776	2.72227e-08	5.71574e-07		Potri.005G190800	9.26217	7.23578	9.60601	8.48182	2.59041e-13	8.47094e-12
Potri.013G099500	-0.0538549	0.897413	-3.37163	-4.13449	2.74022e-08	5.74911e-07		Potri.016G031400	3.53301	-1.81421	-1.77067	-1.88465	2.64507e-13	8.63951e-12
Potri.013G005800	-2.37551	-1.99281	0.88653	-0.335441	2.92365e-08	6.11551e-07		Potri.001G378300	1.8103	2.22307	2.2448	5.98513	2.6548e-13	8.66114e-12
Potri.013G106100	-1.4242	0.649683	-2.01872	-0.477043	2.93545e-08	6.13559e-07		Potri.012G136600	-3.98777	-4.0456	-8.37279	-2.11408	2.67225e-13	8.70784e-12
Potri.005G241700	-1.0943	0.0893654	-1.67584	-1.66534	2.9524e-08	6.16639e-07		Potri.002G010100	-1.67345	-4.52796	-2.92019	-3.09228	2.74291e-13	8.92763e-12
Potri.006G189100	-1.12577	-1.65812	0.704531	0.28487	2.98598e-08	6.22255e-07		Potri.012G047500	-3.19484	-5.2258	-1.68484	-3.9979	2.84901e-13	9.2621e-12
Potri.003G181900	-1.36423	-0.692994	0.967372	-0.0398338	3.02547e-08	6.29542e-07		Potri.018G063100	-3.25709	-7.64665	-3.74292	-5.20852	2.94763e-13	9.57152e-12
Potri.005G222300	-1.9084	-0.652461	-3.55765	-3.55925	3.13607e-08	6.50611e-07		Potri.007G036400	2.90986	2.26006	3.37675	8.54219	3.29361e-13	1.06206e-11
Potri.014G050300	-1.22218	-0.0413671	-2.85434	-1.34255	3.29166e-08	6.79853e-07		Potri.003G068900	4.38962	2.66073	2.2475	1.87425	3.34109e-13	1.07612e-11
Potri.006G128500	-1.04281	-2.47626	0.591013	-0.1427	3.33541e-08	6.8787e-07		Potri.005G252300	1.52545	1.47411	-1.08047	-1.15244	3.34645e-13	1.0766e-11
Potri.006G018900	-2.8357	-2.03365	-1.13176	-2.44372	3.48169e-08	7.14951e-07		Potri.017G020100	-1.10783	-2.876	-8.13301	-4.30254	3.96675e-13	1.2659e-11
Potri.006G091800	-2.53088	-1.11648	-3.82073	-1.25448	3.5083e-08	7.19313e-07		Potri.002G184900	-1.25083	1.57983	-1.50607	-3.55841	4.0553e-13	1.29267e-11
Potri.004G175800	-1.85544	-1.84854	-0.0269958	-0.489743	3.70332e-08	7.56466e-07		Potri.003G196400	-3.10159	-5.25417	-8.33105	-2.69174	4.26561e-13	1.3535e-11
Potri.011G017600	0.466042	0.689832	-0.321188	-5.26956	3.84598e-08	7.83309e-07		Potri.015G003500	9.37435	5.53304	8.66193	6.83692	4.54999e-13	1.44045e-11
Potri.002G108400	-3.59208	-1.14307	-1.30232	-4.02847	4.12528e-08	8.36392e-07		Potri.013G059700	1.39591	-1.07936	-1.20638	-1.35319	4.75824e-13	1.50296e-11
Potri.002G069000	-1.86961	-1.642	0.626356	-0.259926	4.48535e-08	9.02316e-07		Potri.006G120600	7.69009	8.48104	7.55281	5.18006	6.03717e-13	1.88974e-11
Potri.008G157400	-1.54619	-2.28375	0.509739	-0.108869	4.57877e-08	9.20445e-07		Potri.013G017900	-6.87541	-6.87541	-1.56953	3.06643	6.2446e-13	1.94809e-11
Potri.014G049900	0.499301	0.107815	-2.35172	0.11142	4.65025e-08	9.32124e-07		Potri.004G102800	-1.65011	-4.27514	-5.31245	-4.44591	6.39837e-13	1.99159e-11
Potri.011G152400	-1.21454	-0.581578	-2.78882	-1.73319	4.72864e-08	9.46474e-07		Potri.009G160700	4.84168	5.98049	3.81031	3.00647	6.44838e-13	2.00491e-11
Potri.001G143900	-2.3998	-1.19303	-0.663199	0.175374	4.74509e-08	9.49086e-07		Potri.001G113000	-2.45923	-2.07046	-2.14609	-2.39394	6.82014e-13	2.11577e-11
Potri.T093600	0.750034	-1.58533	0.839046	-1.7502	4.75228e-08	9.49843e-07		Potri.005G121800	-3.67933	-3.6201	-2.93222	-1.93617	7.03771e-13	2.18083e-11
Potri.006G187500	-4.16403	0.968822	-0.0279798	-0.256352	4.75625e-08	9.49955e-07		Potri.011G037300	8.27506	6.56317	4.60885	5.63581	7.33059e-13	2.25899e-11
Potri.002G058000	-0.908836	-2.42648	0.54387	0.198287	4.96207e-08	9.87523e-07		Potri.009G034500	3.9906	5.87846	4.47697	2.37597	7.50235e-13	2.30681e-11
Potri.007G098500	-2.52068	-1.62825	-1.34894	-1.58024	5.05037e-08	1.00407e-06		Potri.014G071200	4.42575	1.85022	5.12977	4.86812	7.55811e-13	2.32138e-11
Potri.007G024000	-1.97442	-3.23192	0.256452	-0.386104	5.05245e-08	1.00407e-06		Potri.008G123300	-3.00568	-2.21471	-1.72217	-1.74339	7.57308e-13	2.32341e-11
Potri.011G131900	-1.06037	0.317729	-1.90863	-2.15601	5.19088e-08	1.02865e-06		Potri.010G151600	-1.01456	-2.6675	-2.95355	-2.77885	7.7382e-13	2.37145e-11
Potri.003G082100	-3.13413	-1.73497	-2.17246	-2.48654	5.38767e-08	1.06086e-06		Potri.002G054900	5.80284	4.17119	3.82716	1.82692	7.80909e-13	2.39055e-11
Potri.003G196500	0.320091	0.22246	-2.48248	-0.546754	5.40131e-08	1.06279e-06		Potri.002G202400	7.42504	3.09627	6.28485	7.82451	7.83272e-13	2.39514e-11
Potri.013G109400	-0.328845	0.0755911	-3.01603	-0.519964	5.41586e-08	1.06415e-06		Potri.008G030200	-3.03435	1.53545	-2.35477	-3.30457	7.88476e-13	2.40576e-11
Potri.003G215600	-2.78226	-0.573728	0.0572157	-0.265474	5.43756e-08	1.06691e-06		Potri.007G121100	-2.62403	-2.14568	2.4004	1.09377	8.23176e-13	2.50339e-11
Potri.007G006600	-1.60748	-1.24876	0.558318	-0.398675	5.52873e-08	1.08251e-06		Potri.015G127700	6.48704	7.85566	4.26982	3.82786	8.28103e-13	2.51562e-11
Potri.009G120300	-4.22245	-0.149873	-2.98787	-1.42285	5.81343e-08	1.13586e-06		Potri.005G070400	-1.29143	-1.61691	-2.84185	-2.57967	8.39823e-13	2.54289e-11
Potri.003G159700	0.603439	0.658931	0.229067	-4.85164	5.9263e-08	1.15548e-06		Potri.007G098500	-3.47153	-1.47848	-1.87586	-1.81494	8.65573e-13	2.60949e-11
Potri.009G116600	-4.87873	-2.01422	-2.93771	-1.33755	5.99591e-08	1.16742e-06		Potri.012G134100	1.07527	1.08104	2.61533	4.13887	9.40473e-13	2.81393e-11
Potri.009G067300	-2.11045	-1.83793	-0.637121	-0.874152	6.31089e-08	1.22532e-06		Potri.010G104200	3.41745	2.62684	1.77699	1.17887	9.64391e-13	2.8762e-11
Potri.003G099000	-3.93111	-3.42545	-3.16175	-1.89546	6.40493e-08	1.24099e-06		Potri.016G121400	6.26596	5.28091	3.73019	2.7226	9.66618e-13	2.87975e-11
Potri.009G111700	-1.65245	-0.00476666	-2.2081	-0.682721	6.56513e-08	1.26938e-06		Potri.012G002700	-1.83973	-5.73893	-2.22136	-1.21271	9.94587e-13	2.95043e-11
Potri.008G065000	-2.61218	0.832752	-6.83004	-4.27162	6.76219e-08	1.30657e-06		Potri.016G111000	-1.0668	1.91001	-2.95927	-1.03811	9.95661e-13	2.95047e-11
Potri.006G031700	-1.74168	-0.243729	-2.09455	-1.57273	6.86502e-08	1.32461e-06		Potri.005G237800	-1.73506	-5.56266	2.18905	3.18252	1.02214e-12	3.01926e-11
Potri.004G047100	-2.51018	0.375347	-1.00953	0.0708739	7.41807e-08	1.42736e-06		Potri.017G098000	-6.41625	-5.76597	-7.16533	-6.69868	1.03086e-12	3.04182e-11
Potri.017G147400	-1.90577	-0.618322	0.906612	0.262774	7.9311e-08	1.51874e-06		Potri.010G211400	-1.70487	-3.72783	-1.92203	-1.15802	1.11728e-12	3.28981e-11
Potri.T163400	-2.10885	-0.71888	-4.0346	-1.59199	8.41456e-08	1.60192e-06		Potri.016G029600	3.2532	3.7793	2.7852	3.89124	1.1238e-12	3.30551e-11
Potri.001G044300	-2.53895	-0.447676	-0.236176	-0.693095	8.43414e-08	1.60404e-06		Potri.013G103800	-8.51932	-4.89623	-4.60353	-1.10331	1.13387e-12	3.32809e-11
Potri.003G089600	-1.13908	-0.0913998	-2.56909	-1.20705	8.63955e-08	1.63863e-06		Potri.003G067400	-2.79311	-8.261	-5.05316	-5.33154	1.17585e-12	3.43349e-11
Potri.003G207200	-0.67593	-2.17298	0.821553	0.274708	8.7119e-08	1.64584e-06		Potri.013G009000	5.44733	2.41597	3.98032	1.89703	1.3297e-12	3.85005e-11
Potri.001G121200	-0.459006	0.234801	-2.28249	-1.0895	8.72298e-08	1.64661e-06		Potri.008G134000	2.75938	4.59471	5.20971	4.74876	1.38118e-12	3.98251e-11
Potri.018G056000	-2.70896	0.689151	-2.62699	-1.09071	8.86524e-08	1.67215e-06		Potri.T153200	1.22742	1.28302	-1.30529	-2.2685	1.43813e-12	4.13813e-11
Potri.010G237200	-2.04484	-1.58245	-0.751688	-1.4313	8.8703e-08	1.67215e-06		Potri.006G172700	-4.97177	-3.65325	-1.39279	-1.67816	1.49549e-12	4.29427e-11
Potri.008G012400	0.639393	0.0797426	0.121242	-3.7702	8.99957e-08	1.69537e-06		Potri.006G097500	-1.4122	-2.00545	1.84333	1.74019	1.52414e-12	4.37204e-11
Potri.009G043200	-0.980416	-0.139399	-2.51777	-1.03859	9.10015e-08	1.71317e-06		Potri.002G001400	2.41399	2.51713	2.59755	3.79972	1.7498e-12	4.98334e-11
Potri.013G156400	-4.17136	-1.67141	-1.32835	-1.31147	9.3237e-08	1.74934e-06		Potri.005G028100	-5.08264	-1.09482	-1.16449	3.57079	1.82226e-12	5.16598e-11
Potri.009G086400	-2.47354	-1.3285	-1.46503	-0.856002	9.55764e-08	1.78842e-06		Potri.003G128400	-3.64026	-3.83856	-2.84428	-2.05658	1.82322e-12	5.16598e-11
Potri.006G129700	-2.25891	-1.94453	-0.500989	-0.578474	9.56643e-08	1.78886e-06		Potri.014G022800	2.72692	3.04281	1.62027	1.12688	1.82765e-12	5.17327e-11
Potri.006G004300	-0.537385	-2.15262	0.795164	0.269248	9.86097e-08	1.83654e-06		Potri.003G040400	-3.05313	-4.03249	-5.25501	-1.13943	1.8384e-12	5.19838e-11
Potri.015G140900	-0.05364	0.625052	-1.94898	-1.10828	1.08567e-07	2.00856e-06		Potri.014G158400	-1.22986	-1.23137	2.4302	5.11987	2.01467e-12	5.65084e-11
Potri.005G211600	0.658856	0.405377	-2.77514	-0.0861642	1.10132e-07	2.03346e-06		Potri.012G014200	7.15452	2.2526	2.49085	3.29381	2.19164e-12	6.11633e-11
Potri.002G079900	-1.65775	-0.51896	0.850789	0.412131	1.12625e-07	2.07537e-06		Potri.019G086200	2.46706	4.79102	3.94548	5.58421	2.25774e-12	6.27563e-11
Potri.018G062300	0.942711	-1.3179	-0.853314	0.471942	1.14237e-07	2.1009e-06		Potri.013G083500	7.4954	8.46074	5.60174	4.21787	2.40354e-12	6.64104e-11
Potri.014G119100	0.918504	0.186886	-1.62867	-0.176259	1.15335e-07	2.1197e-06		Potri.005G156700	6.03075	2.8731	4.18674	3.77424	2.60914e-12	7.15223e-11
Potri.005G184700	-0.720521	-1.98702	0.883779	0.138732	1.19104e-07	2.18204e-06		Potri.001G463000	-1.53725	1.74985	-7.09336	-1.91106	2.61439e-12	7.15956e-11
Potri.001G068500	0.0552341	0.30258	-2.62649	0.0401502	1.21582e-07	2.22132e-06		Potri.014G122000	1.29531	1.00564	-1.84502	-3.30791	2.6486e-12	7.24612e-11
Potri.005G202300	-2.70231	-1.22292	-0.871618	-2.02042	1.23516e-07	2.25075e-06		Potri.013G048800	-5.42949	-3.16356	3.45283	5.39734	2.83797e-12	7.71861e-11
Potri.002G227300	-0.465298	-1.70932	0.987655	0.873257	1.25983e-07	2.29121e-06		Potri.001G147700	-5.60236	-4.82152	-4.61179	-4.26174	2.84638e-12	7.73391e-11
Potri.004G114300	-2.78039	0.505335	-0.753373	-5.04603	1.26256e-07	2.29468e-06		Potri.001G102300	5.49712	5.06504	3.45121	4.01781	2.86143e-12	7.76721e-11
Potri.010G143000	-1.48089	0.221645	-2.51534	-1.55074	1.28036e-07	2.32525e-06		Potri.019G040700	6.76533	6.25857	6.37896	6.22188	3.38128e-12	9.03713e-11
Potri.003G058900	-0.0395526	0.727628	-1.94784	0.0425189	1.28153e-07	2.32525e-06		Potri.010G089800	6.14633	5.54825	5.42593	4.0484	3.40845e-12	9.10099e-11
Potri.019G038900	-6.2348	-6.2348	-6.2348	-6.2348	1.28188e-07	2.32525e-06		Potri.014G117500	-2.79142	-2.6844	-1.08513	-1.53601	3.61719e-12	9.62138e-11
Potri.013G100500	-0.463895	-2.23217	-0.94411	0.153164	1.286e-07	2.3312e-06		Potri.011G167200	7.16608	7.2366	3.23566	3.47163	3.85173e-12	1.02025e-10
Potri.008G110000	-5.91256	-1.86723	-4.17617	-9.81342	1.29066e-07	2.33813e-06		Potri.006G137300	-1.88335	1.20803	-1.22422	-4.44303	3.87119e-12	1.02378e-10
Potri.004G150600	-2.80518	0.198898	-1.12434	-0.824423	1.29653e-07	2.34723e-06		Potri.013G142100	-3.3103	-5.52859	-3.26943	-4.17011	4.1323e-12	1.08565e-10
Potri.001G326200	-1.90423	0.120042	-2.15785	-3.82695	1.31163e-07	2.37148e-06		Potri.004G117800	4.0396	2.33568	1.18092	1.19671	4.28363e-12	1.12241e-10
Potri.007G105300	-1.11531	-0.481068	0.783299	-1.73679	1.33682e-07	2.41234e-06		Potri.008G088100	-3.44195	-3.41159	-4.23283	-1.20618	4.36788e-12	1.14131e-10
Potri.013G054200	-7.21075	-1.85792	-3.8007	-2.29246	1.42211e-07	2.54974e-06		Potri.001G061800	2.05113	1.02485	-1.98728	-3.31272	4.36883e-12	1.14131e-10
Potri.015G066200	-1.63333	-1.34711	-2.41345	-0.986449	1.44574e-07	2.58876e-06		Potri.006G245300	-1.12348	-1.7925	-3.37947	-4.17959	4.5478e-12	1.18473e-10
Potri.007G023600	-2.48505	-0.785822	-1.33584	-1.02705	1.45866e-07	2.60687e-06		Potri.002G179800	-3.58514	-2.92246	-1.315	-1.44996	4.63996e-12	1.20198e-10
Potri.015G121300	-2.01399	0.464742	-0.720415	-0.816605	1.47876e-07	2.63772e-06		Potri.013G141300	-3.44667	-7.28904	-7.28904	-4.85458	4.6745e-12	1.2098e-10
Potri.014G070700	-2.20497	-0.275202	0.0988284	-0.916991	1.49482e-07	2.65955e-06		Potri.016G002300	-3.38571	-1.9705	-1.63777	-1.29585	4.89487e-12	1.2633e-10
Potri.012G083300	-1.07003	-1.12327	0.741775	0.776483	1.52945e-07	2.71251e-06		Potri.009G048100	8.72702	7.05469	6.23038	6.05844	5.00245e-12	1.28987e-10
Potri.008G046200	-0.647767	-0.889389	-2.3616	-1.13219	1.57852e-07	2.7942e-06		Potri.015G128100	-2.73977	-2.15525	-4.5129	-5.70498	5.13233e-12	1.32091e-10
Potri.018G127400	-1.89107	0.887049	-2.2044	0.720481	1.59463e-07	2.81914e-06		Potri.015G041300	-2.977	-2.73413	-4.90632	-2.51361	5.14282e-12	1.32238e-10
Potri.005G183000	-1.23019	-1.49472	0.49868	-0.068675	1.63372e-07	2.87729e-06		Potri.004G156500	-1.53039	1.8425	4.35763	5.58106	5.63052e-12	1.44112e-10
Potri.016G036100	0.645927	0.803008	-2.13025	-0.399629	1.64273e-07	2.8895e-06		Potri.001G284800	-3.17444	-7.01503	-7.01503	-7.01503	5.83033e-12	1.48679e-10
Potri.004G047300	-0.721562	0.395158	-2.12531	-0.703332	1.71461e-07	2.9989e-06		Potri.010G053500	-2.67294	-2.72342	-1.93007	-2.51856	6.06088e-12	1.54416e-10
Potri.016G035900	-2.51805	-1.68848	-1.25199	-0.00172769	1.74253e-07	3.04201e-06		Potri.008G079500	9.36066	9.21075	8.87044	7.68783	7.96951e-12	1.99568e-10
Potri.003G136300	0.550103	0.900507	-2.24898	-0.3697	1.75913e-07	3.06635e-06		Potri.012G002500	3.82873	4.18677	3.2162	2.96163	8.06237e-12	2.0153e-10
Potri.003G199700	-2.16377	-6.41933	0.0561999	-0.276341	1.7622e-07	3.06864e-06		Potri.018G088800	-6.11491	-3.66117	-3.68852	-4.2601	8.20106e-12	2.04813e-10
Potri.011G042300	0.374807	0.630168	-1.54537	-3.08706	1.80648e-07	3.13596e-06		Potri.005G119200	5.40515	3.49875	4.23454	4.56586	8.54341e-12	2.1298e-10
Potri.005G112600	-1.42283	-1.33835	0.515658	0.163546	1.8304e-07	3.17155e-06		Potri.006G232900	1.38073	1.90118	-1.33354	-1.09815	8.58828e-12	2.13907e-10
Potri.014G072000	-2.60515	-1.46328	0.322163	-0.267844	1.83254e-07	3.17329e-06		Potri.007G016800	-3.87682	-2.97676	-4.35305	2.03489	8.62033e-12	2.14513e-10
Potri.008G193800	-0.281674	0.440862	-2.29025	-0.590007	1.8535e-07	3.20163e-06		Potri.006G263600	6.23705	4.94035	4.74208	2.27051	8.63588e-12	2.14707e-10
Potri.005G229600	-0.803812	-2.12945	0.59974	0.118535	1.89922e-07	3.27654e-06		Potri.011G023500	-1.15738	1.03551	1.35826	4.68065	8.74198e-12	2.16957e-10
Potri.006G073000	-0.812489	0.0594342	-4.58568	-1.34346	1.9391e-07	3.33913e-06		Potri.006G267400	-1.9514	-1.55736	1.92957	2.38658	9.0168e-12	2.23379e-10
Potri.014G006000	0.829821	0.766198	-2.61388	0.569553	2.00296e-07	3.43635e-06		Potri.014G087600	4.06654	2.57804	2.6606	1.74212	9.04034e-12	2.23762e-10
Potri.005G116900	-0.964617	-1.85278	0.608127	-1.22389	2.11581e-07	3.61662e-06		Potri.005G113400	3.66556	3.20154	1.61787	1.60177	9.47817e-12	2.34183e-10
Potri.016G014400	-0.855119	-1.76664	0.318883	0.486059	2.13491e-07	3.63966e-06		Potri.018G126700	-3.71672	-4.73811	-5.83915	-4.50517	9.58648e-12	2.36648e-10
Potri.003G077300	-3.02424	-0.856071	-0.193092	-1.435	2.13583e-07	3.63966e-06		Potri.018G126000	-5.35128	-6.93699	2.54547	4.89462	1.02479e-11	2.52081e-10
Potri.001G458600	-1.15631	-0.535709	-2.58427	-1.03974	2.20324e-07	3.74995e-06		Potri.008G185900	-3.43842	1.89354	1.99665	1.61654	1.20442e-11	2.93191e-10
Potri.009G075300	-2.31947	-1.2364	0.0705379	-0.540785	2.25269e-07	3.8271e-06		Potri.003G153500	-4.34595	-5.02699	-7.27125	-2.49089	1.20787e-11	2.93734e-10
Potri.006G273700	-1.67589	0.236205	-2.36208	-3.27169	2.31569e-07	3.91741e-06		Potri.005G129600	-3.39884	-7.24009	-7.24009	-3.93993	1.23056e-11	2.98993e-10
Potri.004G138400	-3.04123	-2.63278	-1.64481	-1.56668	2.40066e-07	4.04641e-06		Potri.004G020900	-1.75434	-4.57482	-3.10226	-1.61291	1.23843e-11	3.00642e-10
Potri.001G229700	-2.34926	-1.75036	0.568885	-0.87806	2.41126e-07	4.05692e-06		Potri.006G101500	-2.59859	-3.15536	-2.78128	-2.17143	1.33062e-11	3.22457e-10
Potri.010G137100	-0.488069	-1.62114	0.83305	-2.02059	2.42137e-07	4.07147e-06		Potri.019G003800	6.22982	3.14065	4.49916	2.56245	1.38151e-11	3.33628e-10
Potri.018G130300	-2.27432	-3.01491	-1.15904	0.143089	2.4578e-07	4.12774e-06		Potri.002G100500	2.85807	4.60155	3.10909	2.55738	1.45326e-11	3.49435e-10
Potri.002G081800	-2.61244	-0.650421	-0.256351	0.103768	2.47038e-07	4.14387e-06		Potri.002G002100	3.11494	3.38487	4.0413	3.22171	1.46916e-11	3.52955e-10
Potri.014G015600	-0.419172	-0.538868	-2.30817	-0.919452	2.48653e-07	4.16846e-06		Potri.004G068100	6.69505	8.45829	8.14483	8.25017	1.50368e-11	3.60866e-10
Potri.006G139100	-1.56458	0.795834	-1.28494	-1.99531	2.50251e-07	4.19272e-06		Potri.010G059600	4.86732	5.76756	4.44885	4.15991	1.50953e-11	3.61403e-10
Potri.008G043700	-2.29403	-1.36453	-0.232124	-0.216829	2.51543e-07	4.2093e-06		Potri.006G105600	3.73627	2.59491	2.78386	5.25658	1.57052e-11	3.74072e-10
Potri.004G209700	-1.46127	-1.25203	0.494383	-0.203929	2.52532e-07	4.22078e-06		Potri.004G113500	-3.76893	-2.58349	-1.75959	1.11964	1.59539e-11	3.79669e-10
Potri.007G071100	0.91952	0.411972	-1.81828	0.362003	2.59422e-07	4.31781e-06		Potri.010G003200	-2.20438	-1.78141	-3.01868	-1.52366	1.71153e-11	4.04883e-10
Potri.013G047600	-1.49658	-0.401285	-2.43702	-1.98693	2.607e-07	4.3365e-06		Potri.014G124500	-2.06882	1.6783	3.2188	4.26727	1.73617e-11	4.10362e-10
Potri.016G136100	-0.892409	-2.28858	-0.522345	-0.370996	2.62258e-07	4.35721e-06		Potri.003G160000	8.35464	5.11722	8.36389	7.13891	1.75267e-11	4.1391e-10
Potri.019G072800	-2.30502	-0.73308	-1.70687	-0.757982	2.66628e-07	4.42453e-06		Potri.014G095300	-2.78827	-2.74334	-1.02523	-1.00932	1.8024e-11	4.24572e-10
Potri.014G122000	-3.03352	-0.400466	-2.45396	-0.211612	2.68517e-07	4.45322e-06		Potri.003G194700	5.28497	4.95797	3.65309	2.48757	1.88417e-11	4.41962e-10
Potri.001G071000	-0.251641	-1.45413	-0.539897	-2.06077	2.6919e-07	4.46174e-06		Potri.002G012900	3.18146	4.14379	2.24772	1.12356	1.97473e-11	4.61478e-10
Potri.016G092700	-1.83881	-1.86486	0.519721	0.771943	2.73076e-07	4.52132e-06		Potri.003G039000	-3.85266	-3.80271	2.19132	3.71568	2.01566e-11	4.70027e-10
Potri.008G178800	-0.463126	0.451864	-2.15609	-0.749309	2.73109e-07	4.52132e-06		Potri.006G206800	-3.22586	-3.22586	3.99587	4.4312	2.08526e-11	4.84227e-10
Potri.001G378400	-1.78354	0.20106	-1.06971	-2.13411	2.86643e-07	4.72291e-06		Potri.010G095900	-1.91883	1.34217	-1.19028	-2.4752	2.08857e-11	4.8459e-10
Potri.004G102700	-0.694165	0.590723	-2.14759	-1.5963	2.98999e-07	4.91197e-06		Potri.001G067600	6.97817	1.74858	5.86157	4.87708	2.12159e-11	4.91841e-10
Potri.008G168800	-0.481053	-0.227376	-2.51074	-0.502599	3.00046e-07	4.92627e-06		Potri.005G175300	7.09421	6.9353	3.36795	4.46146	2.16567e-11	5.01641e-10
Potri.016G002300	-2.44352	-2.10322	-0.617606	-0.807319	3.02011e-07	4.95376e-06		Potri.008G084100	-2.61142	1.53258	-3.39201	-5.27323	2.16771e-11	5.01696e-10
Potri.007G032800	-1.6104	0.658802	-1.22844	-0.701878	3.13008e-07	5.11797e-06		Potri.007G111100	4.27777	3.77336	2.94128	2.88077	2.17224e-11	5.02326e-10
Potri.006G127400	-1.43852	-0.631043	0.848607	-0.414282	3.19753e-07	5.21907e-06		Potri.009G039200	2.16061	3.0374	1.68307	4.21138	2.18542e-11	5.04954e-10
Potri.018G103300	-0.888746	-0.349961	-2.8585	-0.479235	3.22468e-07	5.25722e-06		Potri.003G207500	-3.33882	-1.77162	1.48931	1.45076	2.35741e-11	5.41989e-10
Potri.003G030300	-1.93449	0.497801	-1.03123	-0.320739	3.24223e-07	5.28073e-06		Potri.009G161500	3.54968	4.63047	3.52545	4.10272	2.37712e-11	5.46069e-10
Potri.001G251600	-1.12472	0.358756	-2.32328	-0.764784	3.24289e-07	5.28073e-06		Potri.007G043800	4.16532	2.44413	2.75141	2.962	2.46685e-11	5.66214e-10
Potri.013G065300	-6.31414	-3.13267	-6.31414	-6.31414	3.28257e-07	5.34223e-06		Potri.002G162800	-2.01181	-1.12272	-2.20216	-2.52574	2.4965e-11	5.71605e-10
Potri.011G021100	-0.00499931	0.174309	-2.6749	-1.05064	3.32423e-07	5.39742e-06		Potri.008G018900	3.86645	4.00312	1.92785	2.70049	2.54038e-11	5.81172e-10
Potri.006G268000	-0.97332	-1.43583	0.83775	0.142124	3.33395e-07	5.41005e-06		Potri.010G116900	8.65617	9.14865	5.10119	6.53223	2.54653e-11	5.81437e-10
Potri.001G265300	-3.43146	0.489722	-2.78628	-3.28478	3.36964e-07	5.46159e-06		Potri.005G073100	4.99212	3.35802	2.30342	2.12833	2.57569e-11	5.85874e-10
Potri.004G065400	0.99557	0.250645	-1.01415	-1.27082	3.38501e-07	5.48333e-06		Potri.002G026300	6.73704	4.00169	9.35657	7.80028	2.59721e-11	5.90287e-10
Potri.010G083900	-0.243154	0.666257	-2.38065	-1.68109	3.41749e-07	5.52951e-06		Potri.008G174900	5.78651	3.962	5.02917	4.13265	2.65011e-11	6.01196e-10
Potri.012G140800	-3.63751	-1.55737	-1.13729	-1.26045	3.48458e-07	5.62499e-06		Potri.012G144500	-2.40261	-3.02132	1.24643	3.10814	2.65168e-11	6.01196e-10
Potri.003G128400	-3.3727	-1.05725	-1.92248	-0.90457	3.48917e-07	5.62914e-06		Potri.014G094800	-3.90186	-4.20918	1.39532	2.55232	2.70561e-11	6.12419e-10
Potri.002G027000	-4.16451	-2.22087	-3.00036	-5.93971	3.51066e-07	5.65725e-06		Potri.019G093100	-4.27213	-4.53745	-3.66227	-3.86542	2.76926e-11	6.24792e-10
Potri.016G016400	-2.04352	-2.47888	0.386914	0.13721	3.54122e-07	5.70259e-06		Potri.013G134300	-3.21189	-3.21189	4.7871	6.95284	3.00696e-11	6.75134e-10
Potri.002G156300	-0.729054	-0.963492	-2.94247	-2.45875	3.6223e-07	5.82368e-06		Potri.009G126700	-7.25248	-7.25248	-7.25248	-2.06369	3.21612e-11	7.16308e-10
Potri.009G004800	-1.23082	-1.34742	0.662217	-1.01285	3.71966e-07	5.93909e-06		Potri.017G130800	-2.64069	-1.6871	1.95503	3.70468	3.26759e-11	7.26026e-10
Potri.004G085400	-2.14133	-1.48062	-0.194961	0.0663674	3.80702e-07	6.06726e-06		Potri.004G033600	3.877	2.92743	2.34003	1.85489	3.34808e-11	7.41539e-10
Potri.012G018100	-0.543496	0.545368	-1.65356	-1.02403	3.83239e-07	6.09233e-06		Potri.001G219100	7.15856	2.24403	2.49095	5.3425	3.40087e-11	7.52633e-10
Potri.001G289400	-1.57046	-2.06818	0.0605962	-0.224666	3.83313e-07	6.09233e-06		Potri.007G122100	-3.09363	-3.62048	2.38702	3.92874	3.50883e-11	7.75289e-10
Potri.018G101800	-1.47926	0.934854	-1.23239	-2.06112	3.92669e-07	6.22329e-06		Potri.004G200400	2.95549	3.89346	2.73948	3.31472	3.60659e-11	7.94994e-10
Potri.004G002700	-1.73161	-1.98006	-0.109843	-0.61725	4.06142e-07	6.41572e-06		Potri.002G108900	-2.07722	-4.18496	3.08588	2.49555	3.67718e-11	8.08631e-10
Potri.009G057200	-1.29771	-0.428532	-2.32128	-1.44076	4.07038e-07	6.41816e-06		Potri.010G096000	-4.05054	-7.50778	2.71399	5.09779	3.777e-11	8.28614e-10
Potri.001G095300	-2.28031	-1.10939	0.0906625	-1.41725	4.3617e-07	6.84652e-06		Potri.004G130200	5.59514	5.41777	5.67957	3.37052	3.83284e-11	8.3954e-10
Potri.012G140700	-3.82536	-1.17261	-2.8844	-1.53129	4.36569e-07	6.84893e-06		Potri.002G203500	5.15621	4.24677	3.55484	4.18348	3.84695e-11	8.41968e-10
Potri.015G112800	-6.71927	-4.03347	-6.71927	-4.16129	4.39052e-07	6.87824e-06		Potri.007G111200	4.39009	4.91467	3.69118	3.06561	4.07928e-11	8.89316e-10
Potri.019G028500	-4.27017	-1.46826	-7.63305	-4.03521	4.39179e-07	6.87824e-06		Potri.009G050700	-3.56422	-2.42872	1.93109	4.07237	4.09882e-11	8.92175e-10
Potri.005G061000	0.99482	-0.12529	-2.08121	0.307332	4.50097e-07	7.03343e-06		Potri.009G090700	4.10583	4.23988	3.73815	2.75784	4.14805e-11	9.00775e-10
Potri.006G035400	-0.258445	-0.0510247	-2.90939	-1.46342	4.60747e-07	7.18775e-06		Potri.009G058400	-3.52544	-3.33796	-8.11939	-2.24462	4.26729e-11	9.24502e-10
Potri.008G106500	-1.46785	-0.562143	-2.79126	-1.1935	4.71536e-07	7.33144e-06		Potri.001G411700	7.40941	6.03525	6.72136	5.4839	4.40956e-11	9.53838e-10
Potri.002G015100	-0.627469	-1.26034	0.67957	0.816021	4.73347e-07	7.3555e-06		Potri.001G270500	6.4236	7.1079	6.88282	4.76197	4.41607e-11	9.54503e-10
Potri.004G191200	-1.58075	-0.429461	-2.60028	-5.33423	4.78716e-07	7.43064e-06		Potri.013G009800	4.26756	1.32024	2.60792	1.95957	4.81315e-11	1.0355e-09
Potri.001G233700	-1.32149	-0.0606294	-1.5157	-2.68981	4.83571e-07	7.49346e-06		Potri.014G025000	5.90884	5.42824	3.54473	2.59452	4.82124e-11	1.03644e-09
Potri.008G146700	-0.737042	0.508825	-1.46362	-1.50773	4.84672e-07	7.50635e-06		Potri.001G218800	3.49877	4.34163	3.41745	4.3936	4.9845e-11	1.06823e-09
Potri.002G078900	-0.153936	0.624217	-2.25415	-0.496179	4.86565e-07	7.53149e-06		Potri.011G041300	-4.14765	-1.58176	-2.44556	-3.44554	5.03605e-11	1.07761e-09
Potri.007G109400	-0.468432	0.150445	-2.59026	-0.465142	4.87248e-07	7.53369e-06		Potri.004G143200	1.08067	4.03026	-2.42062	1.83956	5.10127e-11	1.08906e-09
Potri.011G047700	-0.726538	0.885122	-0.870225	-3.15076	4.92462e-07	7.60586e-06		Potri.007G074500	-1.36237	-2.71796	-6.71098	-1.72804	5.10131e-11	1.08906e-09
Potri.005G100400	-1.40601	-1.69196	0.442419	-0.158192	4.97721e-07	7.67857e-06		Potri.005G078600	-1.65962	1.21513	1.33891	1.49855	5.10992e-11	1.09006e-09
Potri.001G265900	-2.20297	-2.90006	0.239538	-6.44318	5.07513e-07	7.81665e-06		Potri.010G172300	-4.51279	-3.56548	-1.06789	-1.14869	5.34706e-11	1.1389e-09
Potri.005G019600	0.757943	0.845992	-2.0574	-1.26507	5.17694e-07	7.96027e-06		Potri.006G091800	-1.73732	-1.6679	-2.81121	-3.62547	5.54438e-11	1.17732e-09
Potri.010G212800	-1.738	-2.61385	-1.21962	0.301676	5.18739e-07	7.97193e-06		Potri.006G256100	-4.82839	-3.97772	1.08626	1.50241	5.57085e-11	1.18192e-09
Potri.001G263700	0.956433	-0.150461	-1.54213	-2.99931	5.2224e-07	8.0213e-06		Potri.004G123600	-1.29958	-1.73188	-2.66035	-2.16863	5.57455e-11	1.18192e-09
Potri.005G255500	-1.14429	-1.75085	0.57394	-0.404865	5.32356e-07	8.14526e-06		Potri.003G168300	-1.05894	-1.17219	1.53554	1.12888	5.65922e-11	1.19805e-09
Potri.003G066000	-1.57006	-2.30338	-1.89244	-1.41534	5.42178e-07	8.28644e-06		Potri.006G105300	4.43675	3.64142	3.62937	2.53294	5.68078e-11	1.2017e-09
Potri.010G076700	-0.75265	-1.5567	0.724303	0.139077	5.51921e-07	8.42148e-06		Potri.005G057800	4.5392	4.35277	3.33064	3.62818	6.14627e-11	1.28655e-09
Potri.012G039100	0.946801	-0.381003	-1.33391	0.419702	5.5426e-07	8.44791e-06		Potri.013G124400	-2.15995	-1.51347	1.00016	4.38797	6.69431e-11	1.3907e-09
Potri.001G307700	0.137657	-0.0933897	-2.53717	-0.0313018	5.63402e-07	8.56917e-06		Potri.012G047700	-3.214	-3.214	2.8962	6.20189	6.99625e-11	1.44909e-09
Potri.010G104500	-1.03204	-0.534987	0.958681	0.558477	5.80885e-07	8.81711e-06		Potri.012G059500	2.11758	3.04855	4.0223	4.98961	7.0021e-11	1.44922e-09
Potri.001G079600	-2.81033	-0.609938	0.137728	0.0393808	5.81014e-07	8.81711e-06		Potri.010G237200	-2.77655	-1.7909	-2.22288	-1.59454	7.29226e-11	1.50591e-09
Potri.004G144600	-2.71105	-1.21156	-1.38711	0.442639	5.95977e-07	9.01962e-06		Potri.002G049200	3.15013	2.79443	5.03722	5.7205	7.63828e-11	1.57503e-09
Potri.010G047100	-4.05833	-3.4132	-0.585906	-1.19714	6.04264e-07	9.12027e-06		Potri.019G064200	5.65452	3.60856	5.39561	3.95514	7.67991e-11	1.58038e-09
Potri.001G333700	0.145227	0.195355	-2.39789	-0.633223	6.10739e-07	9.19806e-06		Potri.004G136000	6.13386	4.08272	4.89726	4.14859	7.86919e-11	1.61664e-09
Potri.010G042000	-2.30299	-2.52968	-0.842494	0.406076	6.12007e-07	9.21218e-06		Potri.003G150800	3.35089	3.29754	2.46197	2.58628	7.94658e-11	1.63134e-09
Potri.003G079000	-2.3173	-2.99947	-2.57211	-0.432867	6.25926e-07	9.39125e-06		Potri.001G044400	-1.25722	-1.08129	1.93883	1.61876	8.19307e-11	1.67822e-09
Potri.018G126900	-0.438191	0.654184	-1.78253	-1.78436	6.41071e-07	9.58237e-06		Potri.005G223200	6.35836	6.63951	8.17528	6.4704	8.22352e-11	1.68322e-09
Potri.014G038900	-0.449903	0.191767	-2.22913	-1.03376	6.42832e-07	9.60352e-06		Potri.018G098000	4.56167	4.39027	3.40166	3.28893	8.40712e-11	1.71953e-09
Potri.013G005900	-3.49903	-1.01285	0.227702	-0.453331	6.59743e-07	9.82457e-06		Potri.006G129900	-1.07596	-1.12364	2.58295	1.38504	8.85238e-11	1.80661e-09
Potri.003G216700	-1.84953	-0.476648	-2.05356	-1.04779	6.89409e-07	1.02281e-05		Potri.014G133200	-1.0976	-1.1167	-5.74963	-2.29691	9.0733e-11	1.85034e-09
Potri.004G121000	-1.80555	-1.62172	-3.64379	-3.51662	7.01687e-07	1.03826e-05		Potri.014G139900	-1.48354	1.73666	-1.62944	-2.24326	9.84955e-11	1.98822e-09
Potri.008G027900	-5.96593	-2.18441	-1.52401	-1.27684	7.07296e-07	1.046e-05		Potri.013G066700	4.0991	4.98024	4.09314	3.49487	1.0605e-10	2.12528e-09
Potri.004G165200	-2.73896	-2.57168	-3.12489	-2.47576	7.10507e-07	1.05019e-05		Potri.008G057600	5.3556	5.62633	7.84477	7.39767	1.10061e-10	2.20248e-09
Potri.003G189400	-2.14763	-2.45237	-1.34507	-1.84572	7.20095e-07	1.06267e-05		Potri.005G081300	4.86632	3.7076	-2.38418	1.44373	1.10251e-10	2.2047e-09
Potri.010G002400	-1.00869	-1.34932	0.679292	-0.261513	7.33222e-07	1.07919e-05		Potri.009G141700	5.87872	6.42059	6.87952	5.60453	1.13928e-10	2.27169e-09
Potri.012G091700	-3.24708	-1.70813	-1.22544	-0.720251	7.40561e-07	1.08769e-05		Potri.011G034400	-2.47694	-3.12076	-2.25945	-2.17355	1.23238e-10	2.44505e-09
Potri.005G040400	-2.13913	-2.01431	-0.224524	-1.30489	7.51433e-07	1.10018e-05		Potri.009G024500	-4.70006	-2.45667	-2.20818	2.44879	1.24206e-10	2.4625e-09
Potri.008G006800	-3.75125	-2.5348	-0.787252	-2.63489	7.61351e-07	1.11412e-05		Potri.006G075200	-1.93565	-1.79524	-2.20521	-2.64207	1.271e-10	2.51271e-09
Potri.015G091700	-1.33741	0.529767	-1.56726	-0.718164	7.64495e-07	1.11813e-05		Potri.018G089400	-3.29221	-2.2621	-6.519	-2.06127	1.27306e-10	2.51499e-09
Potri.001G018700	-2.21607	-1.60377	-0.499539	-1.62309	7.66602e-07	1.12062e-05		Potri.019G126800	-4.57195	-3.51474	-2.8012	2.32934	1.29383e-10	2.55059e-09
Potri.008G214600	-0.875588	-1.87623	-3.71041	-0.688038	7.789e-07	1.13741e-05		Potri.013G125000	3.51973	4.29958	2.11073	1.49766	1.32562e-10	2.60638e-09
Potri.010G248100	-1.87147	-1.0424	-2.78611	-1.16521	7.83088e-07	1.14292e-05		Potri.002G151900	-2.04674	1.17371	-3.46598	-2.99156	1.32588e-10	2.60638e-09
Potri.003G216100	-2.14629	0.786138	-0.973382	0.0816075	8.00851e-07	1.16701e-05		Potri.016G031500	-3.99179	-2.41815	1.97429	3.00381	1.34166e-10	2.63366e-09
Potri.004G052500	-4.97432	-2.30077	0.228075	-0.741589	8.36986e-07	1.21649e-05		Potri.008G026700	3.6538	3.81696	3.07743	1.75789	1.36045e-10	2.6668e-09
Potri.003G057100	0.54723	-1.91527	0.727797	0.418833	8.49511e-07	1.23276e-05		Potri.014G078700	3.65884	5.01746	3.01366	4.69444	1.37247e-10	2.68845e-09
Potri.004G205000	-0.3508	0.553402	-0.782912	-3.84222	8.58157e-07	1.24466e-05		Potri.019G065000	8.17207	6.01674	8.23152	6.7928	1.44752e-10	2.82949e-09
Potri.001G018200	-1.65832	-1.44678	-0.129063	-0.26789	8.77804e-07	1.27117e-05		Potri.006G205200	5.37651	3.53357	3.47926	3.54448	1.48519e-10	2.89905e-09
Potri.001G382500	-6.04047	0.964058	-1.14133	-1.3321	9.11681e-07	1.31478e-05		Potri.016G128300	4.54593	5.09325	4.28911	3.73912	1.51736e-10	2.95147e-09
Potri.005G101600	-1.87562	0.566647	-0.577368	-1.59048	9.28654e-07	1.33647e-05		Potri.005G124000	-5.6488	-5.6488	1.3209	2.09835	1.65083e-10	3.19767e-09
Potri.009G162800	-1.62914	-1.50167	0.473293	-0.666261	9.343e-07	1.34321e-05		Potri.006G191700	1.75107	-2.38181	5.21051	2.60598	1.71895e-10	3.31805e-09
Potri.012G086300	-6.96971	-3.77532	-0.690706	-3.01685	9.63887e-07	1.38196e-05		Potri.018G038100	4.08813	5.22746	4.09256	6.16651	1.74062e-10	3.35754e-09
Potri.008G091900	-2.31411	-1.93377	-1.44759	-1.18707	9.71682e-07	1.39121e-05		Potri.005G154300	-2.12573	-5.36502	-1.36104	-1.48002	1.76124e-10	3.39497e-09
Potri.001G066000	-3.81636	-0.227036	-1.58594	-1.26138	9.82847e-07	1.40575e-05		Potri.006G155000	3.74448	3.41695	1.19581	1.43319	1.88014e-10	3.61413e-09
Potri.008G024800	-2.95739	0.559128	0.474407	-1.5731	1.03079e-06	1.47054e-05		Potri.007G139600	-3.70257	-3.40266	-5.55485	-1.85219	1.88772e-10	3.6262e-09
Potri.013G027100	-2.0085	-0.145295	-0.414002	-1.6094	1.0449e-06	1.48915e-05		Potri.004G051700	8.78388	8.76859	8.16159	6.72539	2.00381e-10	3.83331e-09
Potri.014G145000	-2.75363	-0.865962	-1.75495	-1.35757	1.0517e-06	1.49732e-05		Potri.006G248200	8.25498	2.25708	5.87057	6.31776	2.05057e-10	3.90898e-09
Potri.009G160600	0.565531	0.364089	-1.6765	-0.775427	1.05433e-06	1.49953e-05		Potri.008G205200	2.33655	3.18799	2.84097	1.65681	2.05115e-10	3.90898e-09
Potri.001G299500	-1.32644	-0.426374	-3.14013	-1.71951	1.14321e-06	1.61604e-05		Potri.010G109100	4.88689	4.9301	3.51072	3.13402	2.05582e-10	3.91395e-09
Potri.017G030600	-1.54718	-0.983195	0.577383	0.518373	1.14979e-06	1.62204e-05		Potri.002G152200	2.49734	1.18614	2.84266	3.44878	2.17999e-10	4.13617e-09
Potri.014G141500	-1.77419	-1.221	-2.59112	-1.03561	1.15476e-06	1.62824e-05		Potri.009G044700	1.41934	1.53538	-1.04297	-1.60192	2.21261e-10	4.19235e-09
Potri.002G009800	-0.117559	-1.40652	0.78174	0.739936	1.17003e-06	1.64644e-05		Potri.008G112300	-2.19217	1.98328	-1.36795	-4.52747	2.30132e-10	4.34562e-09
Potri.013G085300	-1.71622	-1.9457	-0.490378	-0.520669	1.18222e-06	1.66106e-05		Potri.018G008500	3.36285	2.6422	2.73931	2.1655	2.34795e-10	4.42765e-09
Potri.010G155200	-2.52919	0.21812	0.986004	0.334514	1.18703e-06	1.66699e-05		Potri.007G044700	-5.46554	-4.62955	1.22693	2.57287	2.47295e-10	4.64447e-09
Potri.012G083000	-2.79139	-0.890816	-0.913856	-0.532513	1.19282e-06	1.67427e-05		Potri.012G038400	8.20195	8.34234	8.71859	7.59804	2.48409e-10	4.66225e-09
Potri.018G027300	-2.37007	-0.418994	-1.71841	-0.523662	1.25498e-06	1.75729e-05		Potri.007G066700	-3.80089	-1.5607	-3.80089	3.46321	2.49553e-10	4.67739e-09
Potri.011G039700	-1.82229	-3.76321	0.711396	0.332351	1.26176e-06	1.7657e-05		Potri.017G045200	4.26739	4.34831	3.49218	4.77778	2.63943e-10	4.93381e-09
Potri.007G103800	-4.9074	-1.54992	-1.9055	-4.5493	1.27842e-06	1.78542e-05		Potri.007G118600	-2.91438	-1.65562	-7.28066	-7.28066	2.64464e-10	4.94021e-09
Potri.011G101700	-2.4061	-1.87136	-1.53765	-1.3186	1.28147e-06	1.7888e-05		Potri.006G204300	3.93926	2.92903	1.85291	3.25721	2.66392e-10	4.96622e-09
Potri.008G182200	-1.12873	0.0300674	-1.56484	-7.10005	1.29951e-06	1.81054e-05		Potri.009G094200	3.78734	4.2512	1.69318	1.87511	2.7377e-10	5.09011e-09
Potri.003G146800	-1.93005	-1.41505	-0.626044	0.37424	1.29965e-06	1.81054e-05		Potri.008G097900	4.68702	3.23852	2.31482	2.46093	2.7937e-10	5.18037e-09
Potri.005G112900	-1.63754	-1.4361	-0.0883385	-0.4016	1.3076e-06	1.82071e-05		Potri.006G211000	1.05849	4.38854	-2.38409	-2.38409	2.9223e-10	5.4044e-09
Potri.012G020500	0.821896	0.228271	-1.33974	-1.24472	1.31252e-06	1.82665e-05		Potri.003G202400	-4.06019	-2.96814	-6.98553	-6.98553	2.9481e-10	5.44851e-09
Potri.001G118400	-2.07785	-2.82478	-0.629924	0.0713673	1.31879e-06	1.83354e-05		Potri.010G108800	3.1588	3.61951	2.35848	1.40328	2.96606e-10	5.47805e-09
Potri.001G094200	-1.21416	-1.5868	0.562569	-0.700239	1.34207e-06	1.86404e-05		Potri.011G058300	1.77849	1.46957	-1.78981	-2.53835	3.14394e-10	5.78734e-09
Potri.014G076800	-2.48499	-0.663274	-0.0436954	-0.879321	1.35777e-06	1.88304e-05		Potri.019G093400	-3.89639	-2.37753	-1.30548	-1.7764	3.19552e-10	5.87452e-09
Potri.019G093100	-3.84966	-3.48128	-0.814968	-1.03858	1.40773e-06	1.94458e-05		Potri.017G006000	7.16263	5.10567	2.47995	3.29372	3.26649e-10	6.00101e-09
Potri.018G049700	-2.18128	0.657227	-5.50365	-5.50365	1.4475e-06	1.99359e-05		Potri.017G107700	-2.16297	-1.26007	2.62245	1.33608	3.30763e-10	6.06484e-09
Potri.004G052600	-1.67371	-0.915386	0.993623	0.575323	1.45989e-06	2.00669e-05		Potri.011G152400	-3.79372	-3.26381	-2.80608	-1.77658	3.32061e-10	6.08436e-09
Potri.002G053900	0.115006	0.34229	-2.28246	-0.201995	1.46585e-06	2.01289e-05		Potri.010G150800	-2.27991	-3.51206	-1.80394	-1.86167	3.41323e-10	6.23351e-09
Potri.002G256300	-2.49814	-0.997907	0.855772	-0.758168	1.47903e-06	2.02999e-05		Potri.011G151700	-2.38196	-2.38196	-2.38196	4.30954	3.4179e-10	6.23795e-09
Potri.003G060000	-2.04435	-3.15596	-0.560928	-1.10359	1.48152e-06	2.0324e-05		Potri.013G012300	-4.0118	-2.81354	-4.62566	-2.79961	3.45945e-10	6.3055e-09
Potri.002G075400	-1.8344	0.355327	0.132103	-0.397391	1.50027e-06	2.0561e-05		Potri.007G103600	4.52848	3.83646	2.92017	3.00501	3.63522e-10	6.58701e-09
Potri.006G229300	-1.53958	-1.81319	0.00182418	-0.405771	1.50586e-06	2.06275e-05		Potri.002G065300	2.88485	3.02417	3.36049	2.63824	3.64274e-10	6.59632e-09
Potri.012G114200	-0.54765	-1.27314	0.871312	0.242868	1.5084e-06	2.06521e-05		Potri.011G070100	3.56413	2.62169	1.61477	1.0746	3.65616e-10	6.61633e-09
Potri.006G094100	-5.80795	-5.80795	-5.80795	-5.80795	1.51996e-06	2.07899e-05		Potri.006G036200	1.9752	4.26516	1.32672	-1.32746	3.76203e-10	6.79464e-09
Potri.T053600	-3.86379	-2.06204	0.264399	0.228252	1.52548e-06	2.08553e-05		Potri.007G050600	-2.12851	-2.16188	-1.96016	-2.02585	3.82372e-10	6.89709e-09
Potri.019G107000	-2.12909	-2.68904	0.447103	-0.807087	1.54311e-06	2.10652e-05		Potri.011G112400	3.2515	1.14557	1.34666	2.11792	3.85187e-10	6.94335e-09
Potri.009G028100	0.821616	0.932115	-1.32021	-0.207425	1.55193e-06	2.11545e-05		Potri.019G118100	2.11769	2.73799	3.66403	2.83261	3.89988e-10	7.01626e-09
Potri.003G058700	-0.785493	0.101608	-2.52033	-0.919053	1.57848e-06	2.14535e-05		Potri.008G197500	2.92551	4.77492	8.00038	6.2331	3.91372e-10	7.0366e-09
Potri.015G088400	-1.37427	-0.65838	-2.12551	-4.41324	1.58575e-06	2.15313e-05		Potri.014G016400	2.64253	3.27007	1.861	1.18508	3.92534e-10	7.04838e-09
Potri.014G029100	-1.31199	-2.64523	-1.40203	-1.40873	1.61614e-06	2.18905e-05		Potri.016G048000	-2.26904	-2.78621	-2.44132	-3.14869	4.26011e-10	7.61505e-09
Potri.003G093200	-1.41618	0.413983	-3.49372	-5.65476	1.65421e-06	2.23627e-05		Potri.019G019300	-2.69254	-3.93475	-3.4625	-1.46051	4.33314e-10	7.72572e-09
Potri.004G015900	-3.74632	-2.05237	0.218562	-1.00267	1.65799e-06	2.24029e-05		Potri.006G021600	4.34113	3.64228	3.03579	3.19374	4.37937e-10	7.79314e-09
Potri.003G013100	-1.38811	0.41505	-2.27255	-1.38617	1.6926e-06	2.28042e-05		Potri.008G029700	-9.00603	-3.48086	-1.71305	-2.35165	4.51168e-10	8.01321e-09
Potri.001G164800	-3.27507	0.481878	-0.00752875	0.166283	1.72542e-06	2.32264e-05		Potri.012G123600	-1.23961	-1.63356	-3.05591	-3.89713	4.57308e-10	8.10671e-09
Potri.006G054700	-2.54962	-1.84812	-0.326859	0.867975	1.7497e-06	2.35168e-05		Potri.011G058800	4.97105	4.62361	2.85266	1.09235	5.12255e-10	8.98337e-09
Potri.010G073200	-2.80361	-1.51827	-0.78182	-0.472679	1.78535e-06	2.39496e-05		Potri.003G050900	-3.22769	-1.51515	1.31352	2.07826	5.22562e-10	9.15834e-09
Potri.019G004800	-7.00412	-1.86431	-3.04768	-0.682315	1.80844e-06	2.42244e-05		Potri.019G081200	2.11676	2.00793	1.41911	4.36139	5.25539e-10	9.20472e-09
Potri.008G002700	-2.36787	-1.57022	-1.69861	-2.69806	1.81488e-06	2.4299e-05		Potri.002G234000	4.87061	3.75348	3.3986	2.30297	5.32991e-10	9.31762e-09
Potri.011G025300	-1.77557	-1.60116	0.509652	-2.29079	1.83529e-06	2.45604e-05		Potri.002G119300	4.31172	3.7674	3.0072	3.61236	5.37837e-10	9.39642e-09
Potri.014G143000	0.279631	0.47291	-1.69463	-0.451307	1.86066e-06	2.48642e-05		Potri.004G034100	3.05721	2.35004	1.91798	1.2878	5.47981e-10	9.56764e-09
Potri.015G135400	-1.9901	-0.14877	-0.141914	-0.735785	1.88146e-06	2.51085e-05		Potri.014G148200	2.4375	3.1218	3.03961	2.59868	5.52294e-10	9.63084e-09
Potri.001G050700	-0.441964	-1.27629	0.843621	0.360645	1.8957e-06	2.52534e-05		Potri.004G077700	-2.73616	-1.84922	-5.80655	-1.55003	5.61917e-10	9.78638e-09
Potri.006G271900	-2.94396	-1.39512	-3.10221	-1.94122	1.94881e-06	2.58561e-05		Potri.011G118900	5.1215	2.45972	1.94882	1.7195	5.69388e-10	9.91027e-09
Potri.004G092500	-1.67153	-1.64636	-1.38264	-0.179258	1.96423e-06	2.60483e-05		Potri.001G270300	2.10701	6.73383	6.9693	4.98969	5.79595e-10	1.00753e-08
Potri.001G255800	-2.2089	-1.02613	0.0408416	-0.4528	1.96922e-06	2.60896e-05		Potri.017G052400	3.1004	1.14833	3.72795	2.29017	5.89308e-10	1.02314e-08
Potri.014G097700	-0.652658	0.296279	-2.47741	-0.758019	1.97763e-06	2.61886e-05		Potri.019G034800	1.6256	2.98359	1.07437	1.31084	6.1142e-10	1.05888e-08
Potri.011G122100	-3.31772	0.367049	-0.0498478	-0.712654	2.03302e-06	2.68837e-05		Potri.001G154200	1.58011	3.23094	2.49811	4.07259	6.36015e-10	1.09874e-08
Potri.005G079000	-5.94697	-4.07171	-3.39067	-0.258253	2.03864e-06	2.69453e-05		Potri.017G055400	2.37458	2.35399	5.40637	4.56679	6.54862e-10	1.12849e-08
Potri.012G101600	-1.37795	0.249687	-2.12404	0.168608	2.04169e-06	2.69728e-05		Potri.T091100	-2.67652	-2.52092	-4.09227	-1.68526	6.77588e-10	1.16476e-08
Potri.001G366500	-1.10631	-2.43337	0.701325	0.628473	2.06697e-06	2.72596e-05		Potri.002G053400	-3.20921	-3.20921	4.54975	6.93009	6.78729e-10	1.16564e-08
Potri.011G032400	-0.260332	0.882486	-1.8357	-1.01539	2.0679e-06	2.72596e-05		Potri.004G097100	2.35972	3.80638	2.67764	1.18274	6.78937e-10	1.16564e-08
Potri.008G204100	-2.03043	-0.404913	-1.52508	-3.76296	2.06829e-06	2.72596e-05		Potri.T053600	-3.13032	-1.81094	-3.80297	-3.70909	6.91761e-10	1.18619e-08
Potri.007G007800	-1.81756	-3.15968	-0.540659	-7.01186	2.07396e-06	2.73214e-05		Potri.003G217000	-3.27829	-1.90549	-1.47654	-1.41315	6.92229e-10	1.18626e-08
Potri.010G196400	-2.69069	-0.962009	-0.229233	-0.19239	2.08038e-06	2.7393e-05		Potri.012G117100	8.66103	7.67106	9.93598	7.98559	7.07973e-10	1.211e-08
Potri.002G223700	0.538154	0.369684	-1.78384	-0.350718	2.09307e-06	2.7534e-05		Potri.001G267700	-6.34446	-4.25464	-1.66496	-1.24854	7.21574e-10	1.23275e-08
Potri.009G087500	-2.70156	-2.72515	-2.96599	-2.25891	2.1097e-06	2.77266e-05		Potri.001G109700	-2.52627	-1.65999	1.19352	1.63686	7.4162e-10	1.26389e-08
Potri.005G219800	-1.72345	0.850051	0.114593	-0.03831	2.14941e-06	2.81821e-05		Potri.T106300	-1.35134	-1.19394	2.61266	3.96784	7.42825e-10	1.26517e-08
Potri.005G254100	-0.898792	-2.24462	-0.488292	-0.0596285	2.16233e-06	2.83115e-05		Potri.004G128400	-7.06847	-7.06847	-3.1602	-1.19123	7.45402e-10	1.26724e-08
Potri.008G073800	0.650649	0.415866	-0.282386	-3.29757	2.2543e-06	2.94399e-05		Potri.008G165300	-5.60672	-3.36396	1.3111	1.59611	7.50485e-10	1.27463e-08
Potri.007G033700	-1.47275	-2.29403	-1.07115	-0.970036	2.32139e-06	3.02378e-05		Potri.006G218200	3.27265	3.48869	1.9982	3.80175	7.55147e-10	1.27988e-08
Potri.011G129900	-2.07646	-0.0343076	-3.29796	-0.84698	2.32515e-06	3.02726e-05		Potri.004G189800	2.92881	2.47563	1.69719	1.25683	7.82265e-10	1.32262e-08
Potri.001G253800	-2.30324	0.0403176	0.1669	0.0727805	2.38574e-06	3.10034e-05		Potri.001G451100	7.78683	3.08825	6.28763	6.23653	7.9778e-10	1.34803e-08
Potri.011G144900	0.541873	-0.615841	-1.61404	-0.340938	2.40297e-06	3.11983e-05		Potri.001G034300	-2.05348	-2.08508	-2.46376	-1.89731	7.9962e-10	1.35032e-08
Potri.006G093400	-1.63512	-2.6395	-0.631629	-0.39493	2.43384e-06	3.15311e-05		Potri.011G153300	-1.22271	1.32774	-1.73442	-3.25591	8.27059e-10	1.39327e-08
Potri.006G021500	0.89349	-0.249907	-1.39146	0.384662	2.44933e-06	3.16968e-05		Potri.004G050700	-4.09447	-5.30345	-3.96563	-2.372	8.33435e-10	1.40316e-08
Potri.015G012400	-1.25703	-1.117	-2.03638	-0.670374	2.46377e-06	3.18246e-05		Potri.003G066000	-1.96666	-2.30999	-2.1451	-2.27197	8.56438e-10	1.43697e-08
Potri.010G004200	-1.22503	-1.66925	0.420369	0.333434	2.51207e-06	3.23734e-05		Potri.018G015500	2.11232	2.23821	6.518	7.7524	8.56618e-10	1.43697e-08
Potri.004G044300	-2.33829	-2.5695	-1.06512	-4.26485	2.51668e-06	3.24123e-05		Potri.018G082600	-4.11689	-1.06113	3.27112	6.86434	8.61155e-10	1.44371e-08
Potri.015G103500	-1.3119	-1.02103	0.679618	-0.120431	2.51972e-06	3.24163e-05		Potri.016G129600	-5.036	-1.60272	3.1125	2.85802	8.90088e-10	1.48505e-08
Potri.005G038700	-1.59667	-0.811631	0.51397	0.319323	2.52005e-06	3.24163e-05		Potri.006G253800	-5.00194	-3.08075	1.06148	2.75566	9.09935e-10	1.51543e-08
Potri.002G092500	-2.11206	-0.723569	0.536184	-0.273298	2.52885e-06	3.24995e-05		Potri.006G236800	-1.54052	-2.36693	-1.44544	-2.14271	9.24852e-10	1.53751e-08
Potri.001G124200	-1.10225	-1.78436	0.987184	-0.178709	2.54831e-06	3.27194e-05		Potri.007G023800	-3.13934	-1.94888	-2.49701	-1.78191	9.28247e-10	1.54131e-08
Potri.001G293200	-3.73972	-2.80705	-3.22299	-2.86736	2.55418e-06	3.27796e-05		Potri.012G014700	2.5994	1.04527	-2.10609	-1.2304	9.50969e-10	1.57622e-08
Potri.010G166200	-7.51579	-1.18448	-2.85963	-0.675379	2.57374e-06	3.30155e-05		Potri.005G007900	4.8705	4.14262	4.62486	3.48973	9.5472e-10	1.58144e-08
Potri.001G347900	-0.126929	-0.277636	-3.37079	-0.40185	2.58743e-06	3.31758e-05		Potri.012G145500	5.59182	5.92616	5.3005	3.22925	9.97265e-10	1.64706e-08
Potri.001G394200	-0.164568	0.853944	-1.73651	-0.385689	2.62806e-06	3.35996e-05		Potri.009G164300	4.92436	4.9201	3.26931	2.56394	1.06786e-09	1.75635e-08
Potri.005G026300	-1.07792	-0.437831	-1.78721	-5.63616	2.62893e-06	3.35996e-05		Potri.009G130100	-1.36049	-2.75974	-2.78994	-1.91082	1.11287e-09	1.82714e-08
Potri.012G091200	-1.85338	-3.3706	-0.821373	0.169482	2.64893e-06	3.38242e-05		Potri.T139200	2.37163	1.89436	5.1859	3.16462	1.14678e-09	1.87948e-08
Potri.009G117300	-2.33566	-1.65548	-1.58825	-1.09978	2.65478e-06	3.38678e-05		Potri.010G042000	-2.8837	-3.91403	-1.00979	-1.63001	1.14955e-09	1.88291e-08
Potri.T053800	-4.64174	-1.72819	-0.255351	0.506094	2.66152e-06	3.39092e-05		Potri.001G069200	3.54956	2.06818	4.30438	2.3213	1.20948e-09	1.97293e-08
Potri.001G360300	-0.469545	0.198331	-1.96341	-0.411919	2.69611e-06	3.43009e-05		Potri.009G151300	-2.23788	-1.15101	1.63315	1.26217	1.22396e-09	1.99304e-08
Potri.011G057200	-0.914944	-1.73023	0.0521324	0.183227	2.70278e-06	3.43669e-05		Potri.010G239100	3.35795	3.21187	3.60091	2.74834	1.25521e-09	2.03915e-08
Potri.006G213600	0.19591	-0.725587	-2.05235	-0.966412	2.72055e-06	3.45488e-05		Potri.015G125600	-1.74899	-2.4192	-4.01194	-1.97795	1.25632e-09	2.03976e-08
Potri.004G231600	-2.53094	-0.324306	-0.449552	0.0951087	2.73566e-06	3.47025e-05		Potri.013G091900	-2.7612	-2.05612	-2.90655	-1.21131	1.25754e-09	2.04054e-08
Potri.007G125900	-2.04848	-2.05712	0.832884	0.881841	2.77156e-06	3.50687e-05		Potri.018G069300	-6.59521	-4.34045	-6.59521	-6.59521	1.34759e-09	2.16864e-08
Potri.010G244900	-0.305525	-0.288244	-0.175093	-3.84228	2.83609e-06	3.58039e-05		Potri.009G060500	-1.5937	-1.27726	-2.52147	-2.17284	1.34819e-09	2.16864e-08
Potri.004G087200	-5.7818	-5.7818	-5.7818	-5.7818	2.84575e-06	3.58985e-05		Potri.005G259100	4.945	3.5531	4.20225	3.18289	1.38079e-09	2.21852e-08
Potri.001G118500	-1.06941	-1.66614	-0.14345	0.826885	2.92231e-06	3.67757e-05		Potri.006G177600	-2.22206	1.37623	-3.22942	-2.76358	1.43005e-09	2.28973e-08
Potri.018G126700	-0.986952	-0.929876	-3.62935	-3.31845	2.92704e-06	3.68185e-05		Potri.008G194100	-1.60041	-2.39309	-2.17099	-2.94742	1.46557e-09	2.33718e-08
Potri.001G329900	-2.1484	-0.312514	-0.836772	-0.84729	3.00398e-06	3.77183e-05		Potri.011G075100	-3.0717	-4.68885	-5.67721	-4.80745	1.50042e-09	2.38318e-08
Potri.006G258900	-4.91105	-3.52865	-3.87769	-2.31966	3.14793e-06	3.93911e-05		Potri.019G127400	-1.03559	1.75062	-5.43311	-5.43311	1.50133e-09	2.38327e-08
Potri.013G015300	0.682282	-0.816432	-1.29074	-0.0926235	3.14852e-06	3.93911e-05		Potri.002G238800	-4.46239	-6.55207	1.8836	3.75052	1.54464e-09	2.44783e-08
Potri.011G080900	-1.13305	-0.164975	-1.90054	-0.897772	3.16709e-06	3.9588e-05		Potri.013G142600	-2.22459	-5.11643	-2.37389	-3.09293	1.6986e-09	2.66748e-08
Potri.003G218400	-1.83175	0.493286	-0.838593	-0.765442	3.24535e-06	4.03695e-05		Potri.016G061000	1.96449	1.47727	-5.4604	-2.16043	1.70676e-09	2.67424e-08
Potri.003G159200	-2.34264	-0.368951	-1.07965	-0.387479	3.24555e-06	4.03695e-05		Potri.004G206400	-4.90239	-7.00022	-7.00022	-1.368	1.72327e-09	2.69556e-08
Potri.018G148100	-0.868031	-0.266277	-2.35284	-1.72628	3.25757e-06	4.04647e-05		Potri.005G176000	2.91885	4.56241	7.20732	6.15745	1.76062e-09	2.74471e-08
Potri.008G174100	0.233454	0.318517	-2.52032	-0.397765	3.29222e-06	4.0877e-05		Potri.001G416300	-1.95271	1.08648	-1.47203	-1.37216	1.77226e-09	2.7613e-08
Potri.002G220400	-0.890221	-1.63263	0.758462	0.324032	3.344e-06	4.13932e-05		Potri.008G054900	2.97732	2.45699	1.11077	1.35112	1.79869e-09	2.79935e-08
Potri.010G188200	-0.564635	0.482857	-1.74545	-1.23578	3.38376e-06	4.18086e-05		Potri.T142900	-2.6167	-1.11499	3.03792	1.60905	1.80256e-09	2.80381e-08
Potri.003G194300	0.537829	-0.18888	-1.47489	-0.609704	3.39527e-06	4.19322e-05		Potri.010G231000	1.0717	4.30008	-2.38376	-2.38376	1.87845e-09	2.91045e-08
Potri.005G116600	-2.50122	0.466464	0.242326	0.160368	3.46376e-06	4.26834e-05		Potri.008G044700	-2.94028	-5.06328	3.83501	6.51196	1.88927e-09	2.92557e-08
Potri.009G145200	-0.062445	-0.399762	-2.74472	-0.957991	3.46535e-06	4.26842e-05		Potri.008G038600	-2.37901	4.31095	4.57578	-2.37901	2.11967e-09	3.24619e-08
Potri.002G102200	-2.24619	-2.29321	-2.71044	-1.27262	3.48221e-06	4.28484e-05		Potri.016G080700	3.25255	2.97956	2.91334	1.59402	2.15061e-09	3.28995e-08
Potri.001G241300	-2.87488	-0.299794	-2.69024	-3.67685	3.49441e-06	4.29472e-05		Potri.017G025000	3.82143	4.23733	6.07583	4.94245	2.20454e-09	3.36793e-08
Potri.013G059700	0.163601	-0.0239802	-2.01977	0.0514484	3.52311e-06	4.32046e-05		Potri.004G149000	7.46414	3.08823	5.27049	4.77156	2.22327e-09	3.38991e-08
Potri.006G236300	-6.8469	-1.55914	-2.17928	-3.38979	3.54253e-06	4.34237e-05		Potri.004G089100	-3.19994	-1.24959	-1.58981	-1.3566	2.22717e-09	3.394e-08
Potri.010G041100	-2.07743	-0.347211	-0.0188058	-0.180685	3.56073e-06	4.36084e-05		Potri.001G436300	-2.47909	-2.00446	-1.55369	-1.54993	2.25023e-09	3.42537e-08
Potri.006G247300	-0.788554	-1.72339	0.243363	-0.138806	3.64105e-06	4.44392e-05		Potri.009G055800	3.63078	2.39062	1.48049	1.74765	2.27164e-09	3.45419e-08
Potri.007G123600	0.15826	-0.00214405	-3.1731	-0.539079	3.64133e-06	4.44392e-05		Potri.008G113400	-8.14336	-4.14141	-1.84745	1.03122	2.34314e-09	3.54544e-08
Potri.011G145400	0.234981	-0.225306	-1.89438	-0.58746	3.65355e-06	4.45688e-05		Potri.006G013000	-1.96018	-3.16489	-4.52747	-2.92935	2.36569e-09	3.57568e-08
Potri.017G146800	-1.33224	0.225786	-1.38979	-0.732617	3.7194e-06	4.53324e-05		Potri.016G071600	3.0706	2.83433	1.44261	1.73103	2.40411e-09	3.62586e-08
Potri.012G011800	-3.64651	-2.50204	-1.66229	-0.27762	3.88892e-06	4.71921e-05		Potri.006G261200	-3.5419	-7.68936	-3.07409	-1.72306	2.43672e-09	3.66708e-08
Potri.013G134700	-2.06496	-0.623983	-2.04639	-0.947604	3.96082e-06	4.7981e-05		Potri.003G061100	6.08024	5.60874	6.23874	4.5149	2.44173e-09	3.67263e-08
Potri.006G248400	0.879588	0.512057	-1.42845	-0.0870549	3.97065e-06	4.80583e-05		Potri.006G258900	-8.29625	-1.44939	-3.40965	-4.9995	2.44827e-09	3.68049e-08
Potri.019G052300	-6.21144	-3.04614	-3.65495	-0.549502	3.98979e-06	4.82419e-05		Potri.016G035600	-1.13339	-2.54374	-3.12782	-2.04803	2.48013e-09	3.72032e-08
Potri.019G089000	-2.32972	-0.539391	-0.249449	-0.390836	4.01559e-06	4.84549e-05		Potri.005G232000	-1.50065	-2.89334	-2.95764	-2.06547	2.49861e-09	3.74401e-08
Potri.008G175900	-2.57835	-2.63102	0.287067	0.0406651	4.03287e-06	4.86423e-05		Potri.001G280200	-1.48769	1.87594	-1.23581	-4.12997	2.53396e-09	3.79271e-08
Potri.010G166800	-2.05123	0.616109	0.350711	0.170337	4.05316e-06	4.88659e-05		Potri.009G020700	3.91719	2.08802	2.88916	1.76819	2.66898e-09	3.98213e-08
Potri.005G060700	-1.68708	-2.38203	0.524521	-1.4181	4.07576e-06	4.90959e-05		Potri.006G236200	2.43167	3.52134	1.57017	1.45091	2.72337e-09	4.05457e-08
Potri.006G246100	-0.956252	-1.42551	0.933131	-1.47546	4.0799e-06	4.91246e-05		Potri.016G054700	-1.89661	-2.91752	-2.84296	-1.98635	2.72486e-09	4.05461e-08
Potri.013G060400	-3.25208	-3.26869	-1.96517	-0.645255	4.08695e-06	4.91882e-05		Potri.008G063100	-1.30147	-3.16911	-2.79988	-2.11543	2.77056e-09	4.12042e-08
Potri.008G150000	0.859304	-0.467383	-1.19045	0.239358	4.094e-06	4.92304e-05		Potri.005G195000	7.40714	4.38823	4.55222	3.65998	2.80496e-09	4.16934e-08
Potri.010G082300	-2.34159	-0.276993	-1.64695	0.461014	4.11254e-06	4.94108e-05		Potri.008G117100	1.35039	1.1807	3.51503	2.02614	2.81907e-09	4.18583e-08
Potri.005G057700	0.267334	0.532316	-1.61384	0.0864942	4.2135e-06	5.05148e-05		Potri.009G061500	2.82564	5.43532	1.92065	1.84238	2.86155e-09	4.24212e-08
Potri.011G150200	-0.822196	-1.73572	0.544979	0.885252	4.30805e-06	5.15597e-05		Potri.001G107900	3.44331	1.89876	5.4598	4.95717	2.8713e-09	4.2543e-08
Potri.004G164700	-1.93525	-1.68136	-2.33816	-4.54573	4.3868e-06	5.24121e-05		Potri.001G230900	6.43139	5.24523	3.35087	7.43541	2.93648e-09	4.34162e-08
Potri.001G289000	-0.707885	0.545243	-2.36589	-0.590609	4.47063e-06	5.33451e-05		Potri.008G192600	2.90633	2.96759	1.88849	3.58056	2.9768e-09	4.39422e-08
Potri.008G097300	-0.714832	-0.235181	-2.68617	-0.949175	4.47682e-06	5.3396e-05		Potri.019G130500	6.31098	3.19649	7.37584	6.49288	3.04206e-09	4.48103e-08
Potri.010G079600	-6.16838	-3.49962	-6.16838	-6.16838	4.48553e-06	5.34587e-05		Potri.010G010100	-1.97129	-3.68419	-4.92037	-3.88351	3.14218e-09	4.61384e-08
Potri.017G129700	-2.35267	0.242858	-0.742103	-0.530878	4.49766e-06	5.35759e-05		Potri.016G103900	5.4403	4.75877	7.8196	5.48715	3.22276e-09	4.71721e-08
Potri.004G125600	-1.35196	0.462626	-2.76875	-2.10094	4.51559e-06	5.37204e-05		Potri.015G096500	1.64119	2.81245	4.31898	3.34918	3.25549e-09	4.76011e-08
Potri.008G093800	-2.96833	-0.27713	-0.830019	-2.3386	4.56787e-06	5.4296e-05		Potri.008G089000	1.57396	1.37062	4.52464	3.1362	3.27659e-09	4.78592e-08
Potri.004G223500	-6.17749	0.779026	0.765735	-0.99678	4.62451e-06	5.4829e-05		Potri.010G073900	4.35502	5.44863	5.478	6.90553	3.30751e-09	4.82854e-08
Potri.004G098700	-1.37452	0.553401	-1.52858	-2.75043	4.70099e-06	5.57121e-05		Potri.009G010000	-4.45447	-5.6237	-4.63373	-3.76387	3.40374e-09	4.95602e-08
Potri.012G125900	-0.514298	-1.33482	0.672085	0.24677	4.7448e-06	5.61834e-05		Potri.002G120700	-3.15072	-5.55482	1.00185	2.97905	3.63254e-09	5.25338e-08
Potri.015G031200	-0.340671	-2.0746	-0.161634	0.129074	4.75632e-06	5.6287e-05		Potri.015G046200	8.40007	6.80838	7.62582	5.60518	3.73653e-09	5.39816e-08
Potri.001G359100	-0.917556	0.436575	-2.0991	-0.707532	4.82455e-06	5.69825e-05		Potri.016G035900	-3.22198	-2.49798	-2.0364	-1.10141	3.92935e-09	5.65322e-08
Potri.004G158800	-4.23887	-1.36346	-2.31692	-1.92114	4.82964e-06	5.69999e-05		Potri.002G172300	-3.20318	-7.9642	-4.59334	-1.79733	4.16941e-09	5.98311e-08
Potri.012G091400	-1.85636	-2.70609	-1.13171	0.233222	4.83012e-06	5.69999e-05		Potri.003G158500	3.55421	2.68815	1.43486	1.80414	4.23187e-09	6.06335e-08
Potri.013G089200	-4.40489	-4.98805	-3.48521	-6.87951	4.868e-06	5.74226e-05		Potri.011G156600	4.58471	1.80529	3.01028	4.79289	4.36785e-09	6.24209e-08
Potri.005G140800	-0.167479	0.58737	-1.76199	-0.536334	4.87666e-06	5.75005e-05		Potri.005G249300	2.84314	1.89406	1.13607	1.08229	4.38806e-09	6.26454e-08
Potri.001G364000	-1.00154	-1.80031	0.0623805	-0.0560338	4.91107e-06	5.78083e-05		Potri.001G190700	-3.58457	-1.77981	-3.52464	-1.34447	4.60085e-09	6.53476e-08
Potri.008G192100	-2.01059	0.503595	-0.951867	-3.65964	4.91704e-06	5.78541e-05		Potri.009G081800	8.91407	8.10057	9.54877	7.58851	4.60563e-09	6.5382e-08
Potri.007G137300	0.136504	-0.159114	-3.02375	-0.742696	4.92253e-06	5.78942e-05		Potri.014G034300	3.87472	-1.06862	2.2959	1.19264	4.76821e-09	6.75521e-08
Potri.018G009100	0.249049	0.456163	-1.71093	-0.269965	4.92707e-06	5.79232e-05		Potri.015G081000	-3.63771	-2.19424	-1.79568	-1.14111	4.81041e-09	6.80805e-08
Potri.003G100100	-1.68058	-0.435656	-1.38286	-2.23876	4.98643e-06	5.84731e-05		Potri.005G191800	2.01879	1.44741	4.17889	3.49381	4.85919e-09	6.87358e-08
Potri.009G103700	0.630645	0.684249	-1.49169	-0.31774	5.00683e-06	5.86629e-05		Potri.003G121500	-3.30193	-1.45843	-1.84085	-1.95499	5.1603e-09	7.26624e-08
Potri.013G042700	-2.08715	0.608048	0.377622	-0.0502396	5.01603e-06	5.87459e-05		Potri.T133400	3.24914	1.91239	3.38554	1.21254	5.28078e-09	7.41972e-08
Potri.012G095600	-0.7738	-0.0894737	-1.81068	-1.09946	5.08157e-06	5.94636e-05		Potri.017G139600	-4.72287	-4.00528	-1.08365	2.11446	5.28728e-09	7.41972e-08
Potri.005G232500	-2.22183	-2.10235	-7.78368	-1.15418	5.11571e-06	5.97877e-05		Potri.002G212900	2.92442	1.74953	1.34508	1.6713	5.33028e-09	7.4753e-08
Potri.006G172900	-1.48618	-2.25966	0.278103	-1.23614	5.25125e-06	6.12433e-05		Potri.005G068700	5.29803	4.1458	3.35253	2.55798	5.33676e-09	7.48062e-08
Potri.006G229200	-2.12075	-1.24203	0.00771929	-0.608234	5.27446e-06	6.14625e-05		Potri.009G158900	3.89029	3.74323	2.97992	5.29381	5.36087e-09	7.51062e-08
Potri.010G254700	-1.24026	-1.74386	-0.124551	-0.529138	5.32058e-06	6.19741e-05		Potri.019G004800	-2.13093	-2.11918	-7.06844	-7.06844	5.36681e-09	7.51516e-08
Potri.003G061700	-1.80869	-0.538501	0.534354	0.613073	5.33862e-06	6.21515e-05		Potri.007G138100	4.16701	3.92162	3.25558	4.96195	5.38919e-09	7.54269e-08
Potri.006G132700	-2.42664	-0.967753	-0.999283	-1.13137	5.38392e-06	6.25029e-05		Potri.001G158800	7.62341	5.40513	7.17506	6.15919	5.4669e-09	7.64376e-08
Potri.001G010400	-0.52119	0.0408549	-2.41977	-0.626227	5.42365e-06	6.28854e-05		Potri.005G259900	2.21211	2.40877	1.6568	3.09981	5.62573e-09	7.83823e-08
Potri.005G150400	-2.47769	-0.799132	-0.35277	-0.562504	5.43237e-06	6.29603e-05		Potri.018G057500	-1.29649	-1.9287	-2.07155	-2.03813	5.78951e-09	8.03822e-08
Potri.014G132000	-3.41073	-1.30727	-0.934631	-0.422505	5.46378e-06	6.32981e-05		Potri.019G018600	1.24549	2.50843	-1.54998	-1.23053	5.89783e-09	8.17636e-08
Potri.004G181400	-2.64184	-0.981078	-0.509526	-4.34019	5.47473e-06	6.33631e-05		Potri.013G103900	-6.43592	-4.93983	-3.93508	-1.45066	5.9289e-09	8.21533e-08
Potri.009G164000	-3.04352	-2.58789	-0.576058	-0.346313	5.47622e-06	6.33631e-05		Potri.004G017600	5.5405	6.35977	6.94562	4.33405	6.07195e-09	8.40936e-08
Potri.009G087800	-2.77012	-3.7555	-1.65353	-0.805367	5.51802e-06	6.38202e-05		Potri.008G214500	-5.18786	-1.7044	-1.60276	-1.23254	6.14603e-09	8.50348e-08
Potri.017G118900	-1.64374	-1.19337	-0.0559127	-1.03431	5.59177e-06	6.4566e-05		Potri.002G255000	7.27987	8.37283	6.08952	5.50169	6.21164e-09	8.58144e-08
Potri.002G161600	-3.62191	-2.27097	-0.439074	-0.467765	5.63597e-06	6.49688e-05		Potri.018G095100	3.23261	3.28293	2.03222	2.99744	6.34846e-09	8.7661e-08
Potri.007G139600	-1.61779	-2.21437	-3.208	-2.9064	5.64619e-06	6.50596e-05		Potri.005G057300	-2.04732	-2.3949	-1.81081	-1.33901	6.56009e-09	9.02695e-08
Potri.009G035300	-2.17771	-1.33568	0.506192	-0.911487	5.76098e-06	6.61634e-05		Potri.002G189300	-3.38078	-3.0803	1.85069	2.54121	6.56865e-09	9.03424e-08
Potri.001G255100	-3.97843	0.192121	-1.69983	-4.995	5.76731e-06	6.62088e-05		Potri.008G041400	4.27967	2.91583	2.74336	1.18869	6.68317e-09	9.18267e-08
Potri.012G104200	-1.39273	-0.800411	0.354265	-1.04878	5.76976e-06	6.62097e-05		Potri.T101200	-3.16123	-4.09514	-2.19426	-3.03093	6.80439e-09	9.32618e-08
Potri.019G045800	-0.699683	0.0850262	-2.41876	-0.295016	5.80072e-06	6.64555e-05		Potri.014G023100	-1.93276	-3.69403	-5.24306	-2.96348	7.41163e-09	1.00839e-07
Potri.007G115000	-2.26633	-1.92835	-1.71559	-0.962331	5.88732e-06	6.73645e-05		Potri.017G083300	-2.88762	-1.66781	1.64971	2.90558	7.51993e-09	1.02212e-07
Potri.015G074700	-1.9056	0.260497	-0.88208	-0.787864	5.94752e-06	6.79417e-05		Potri.008G198100	-2.16239	1.43715	-1.08985	-2.57116	7.90399e-09	1.0713e-07
Potri.008G176700	-6.23584	-3.55566	-2.2806	-6.23584	5.99578e-06	6.83529e-05		Potri.005G100700	3.74484	2.83727	2.81164	2.2612	7.9049e-09	1.0713e-07
Potri.013G069900	-0.601814	-0.296733	-2.16314	-0.922593	6.01946e-06	6.85948e-05		Potri.013G157200	-2.21705	-1.67198	3.83466	2.88161	7.97021e-09	1.07858e-07
Potri.001G365600	-1.41035	-1.09458	-1.86989	-1.03021	6.14013e-06	6.97322e-05		Potri.003G216700	-1.23528	-2.23174	-2.20957	-1.45891	8.03251e-09	1.08648e-07
Potri.004G062100	-0.962535	0.858087	-0.141741	-2.37677	6.14377e-06	6.97322e-05		Potri.017G147200	5.12157	4.94748	4.71741	5.16381	8.05559e-09	1.08907e-07
Potri.004G128400	-3.1419	-2.37637	-2.61152	-6.99466	6.16996e-06	6.99489e-05		Potri.T031600	4.94264	7.20098	6.0969	2.43475	8.13491e-09	1.09926e-07
Potri.006G174600	-0.177322	-1.79406	0.790122	0.68642	6.18851e-06	7.01196e-05		Potri.013G005300	4.5399	3.35876	3.15696	1.86306	8.14929e-09	1.10067e-07
Potri.019G073400	-3.28212	-5.63099	-2.81238	-1.62055	6.23937e-06	7.05811e-05		Potri.012G102400	1.4857	1.4022	-2.82376	-1.14547	8.43462e-09	1.13645e-07
Potri.003G038500	-2.51073	-0.838313	0.343904	-2.46765	6.24289e-06	7.05923e-05		Potri.010G157900	1.65838	2.33539	2.33156	3.2683	8.49018e-09	1.14338e-07
Potri.001G095200	-0.632501	0.949125	-0.851801	-2.03353	6.33058e-06	7.14678e-05		Potri.011G074600	-1.21587	-3.46491	-3.39118	-3.31538	8.5227e-09	1.1469e-07
Potri.005G062000	-2.16039	-0.442547	-1.95304	-1.58256	6.33643e-06	7.15049e-05		Potri.002G039100	6.09603	3.71775	5.68896	4.28224	8.53479e-09	1.14772e-07
Potri.005G251300	-1.05968	-0.383778	-2.96747	-0.58827	6.38419e-06	7.18982e-05		Potri.011G082400	6.68999	6.35236	8.18236	5.96867	8.65711e-09	1.16304e-07
Potri.008G191800	-1.23794	-2.39472	-0.474489	-0.178173	6.40069e-06	7.20259e-05		Potri.019G105900	7.62833	4.96461	7.90571	5.61672	8.75503e-09	1.17393e-07
Potri.014G122200	-0.334521	0.393509	0.487052	-5.13346	6.50257e-06	7.30249e-05		Potri.010G145100	-1.1973	-1.45703	-4.10555	-2.77934	8.76357e-09	1.1745e-07
Potri.017G013400	-2.48595	0.641515	-4.67985	-4.63212	6.53242e-06	7.3301e-05		Potri.013G095500	-3.62485	-1.84648	-1.04912	-1.27535	8.77156e-09	1.17501e-07
Potri.009G140500	-0.782412	-1.13662	0.78219	0.435313	6.56319e-06	7.3587e-05		Potri.010G082000	3.67593	1.92034	-4.692	1.87298	8.98815e-09	1.20344e-07
Potri.009G045300	0.467184	-0.145791	-1.67537	0.0806325	6.58343e-06	7.37842e-05		Potri.012G006100	2.8053	2.43216	1.66824	1.6736	8.99971e-09	1.20441e-07
Potri.005G167300	-1.59856	-0.883421	0.565834	0.177524	6.65682e-06	7.45168e-05		Potri.T116700	-4.76166	-6.88108	2.13649	3.40957	9.12911e-09	1.22055e-07
Potri.007G056400	-2.21256	-0.914959	-0.204293	-1.03454	6.7017e-06	7.49891e-05		Potri.012G017400	3.53255	1.62397	-2.38413	4.63121	9.21748e-09	1.23059e-07
Potri.013G119400	-0.919225	0.437038	-1.5058	-0.414429	6.79073e-06	7.58633e-05		Potri.002G190900	2.65337	2.05061	2.36533	4.62684	9.2772e-09	1.23738e-07
Potri.006G151100	-2.00313	-1.45849	-0.0766936	-0.467279	6.81539e-06	7.60912e-05		Potri.009G034800	3.70833	3.28977	2.72696	4.2792	9.45911e-09	1.25989e-07
Potri.006G255800	-2.28336	-0.620521	-0.648661	-0.999898	6.81658e-06	7.60912e-05		Potri.003G142000	-1.70646	-2.46272	2.92637	4.30419	9.79361e-09	1.30188e-07
Potri.006G101500	-0.125823	-1.24966	-1.61154	-0.15623	6.82023e-06	7.61014e-05		Potri.001G278400	2.44201	3.73642	2.18787	1.04149	1.01995e-08	1.35196e-07
Potri.007G011500	-0.968146	-0.984543	-2.54874	-0.918419	6.83406e-06	7.61947e-05		Potri.016G072800	-3.84692	-1.40571	1.5403	1.55787	1.02346e-08	1.35596e-07
Potri.017G129400	-1.59664	0.435045	0.669003	0.481002	6.89091e-06	7.67671e-05		Potri.006G242800	2.31262	1.24373	2.30414	4.30164	1.02686e-08	1.35982e-07
Potri.001G249800	-0.710098	-0.319616	-2.10218	-0.186212	6.92974e-06	7.71072e-05		Potri.016G090500	-3.578	-5.67655	-1.06	1.57209	1.0358e-08	1.37101e-07
Potri.007G052300	-2.45944	-2.43138	-0.445	-0.724578	7.019e-06	7.8038e-05		Potri.009G015400	3.45261	3.7226	2.32511	2.82794	1.04255e-08	1.37797e-07
Potri.016G004800	-1.75188	-0.633085	0.255768	0.469729	7.05732e-06	7.84015e-05		Potri.016G080400	2.45748	4.09198	4.07825	5.4563	1.04431e-08	1.37964e-07
Potri.015G035500	-1.86586	-0.119582	-1.99362	-1.31824	7.06891e-06	7.8499e-05		Potri.006G109100	5.56236	5.57118	3.99731	2.2947	1.06017e-08	1.3986e-07
Potri.001G422600	-3.62723	-3.01637	-2.22218	-3.50878	7.08194e-06	7.86123e-05		Potri.007G115000	-3.05514	-1.2862	-1.81454	-2.27556	1.08687e-08	1.43178e-07
Potri.002G184000	-1.53874	-0.344236	-1.89436	-0.938401	7.09617e-06	7.87076e-05		Potri.009G147500	-1.77049	2.00404	-1.60978	-1.34406	1.10467e-08	1.45248e-07
Potri.001G049900	-0.644574	-0.972802	-2.2417	-0.651102	7.14458e-06	7.9213e-05		Potri.008G182200	-5.13818	-5.83465	-1.8783	-1.03131	1.13097e-08	1.48355e-07
Potri.004G014800	-1.38677	-2.05184	-1.1791	-1.15307	7.17416e-06	7.94777e-05		Potri.008G067700	6.16458	3.55973	5.36079	2.38921	1.1466e-08	1.50264e-07
Potri.001G398500	-0.0108628	0.864459	-0.0955235	-1.71803	7.23458e-06	8.00834e-05		Potri.011G108300	-3.10908	-2.72964	-3.3172	-1.75318	1.16918e-08	1.52934e-07
Potri.010G231900	-0.660042	0.160682	-1.94977	-0.745391	7.23807e-06	8.00902e-05		Potri.004G181800	3.21485	1.52834	4.28223	6.00447	1.17056e-08	1.53042e-07
Potri.018G143700	-4.28405	-0.201594	0.789	0.99376	7.41561e-06	8.17625e-05		Potri.015G058400	-2.30442	-2.11538	-3.14707	-1.56093	1.19132e-08	1.55464e-07
Potri.006G033400	-2.0932	-0.28468	-0.22741	-1.31979	7.4717e-06	8.22832e-05		Potri.019G088600	7.01411	3.09743	6.83514	5.17506	1.20937e-08	1.57672e-07
Potri.007G080800	-1.3665	-1.70884	-0.627138	-0.245352	7.51287e-06	8.26712e-05		Potri.017G050400	6.97368	3.08011	5.54244	3.83052	1.21099e-08	1.5781e-07
Potri.013G009400	-1.40156	-0.740082	0.383535	0.524805	7.5967e-06	8.34947e-05		Potri.007G053400	3.26543	3.41296	4.00523	1.82631	1.21708e-08	1.58529e-07
Potri.012G007500	-1.01776	-0.296836	0.799361	-0.921208	7.70069e-06	8.44198e-05		Potri.003G164900	1.11481	1.20369	-2.11112	-1.34203	1.2516e-08	1.62644e-07
Potri.007G039700	0.417989	0.336386	-1.76755	-0.703299	7.81549e-06	8.54948e-05		Potri.001G121400	-2.58955	-3.40994	-4.55459	-2.57474	1.28544e-08	1.66652e-07
Potri.006G119300	-4.29213	-2.73982	-1.27075	-8.14071	7.88243e-06	8.61593e-05		Potri.001G367600	4.83937	3.70373	6.6828	9.29771	1.3014e-08	1.68485e-07
Potri.012G095800	-1.7128	-0.683186	-2.68298	-1.53002	8.01938e-06	8.73479e-05		Potri.019G099400	6.74161	6.16246	2.49098	3.29375	1.32642e-08	1.71405e-07
Potri.018G144300	-7.01198	-0.71822	-3.60983	-0.0392157	8.05042e-06	8.75833e-05		Potri.010G052900	-1.69177	-5.30315	-3.06606	-1.40496	1.3313e-08	1.71956e-07
Potri.001G403300	-1.20612	-1.60937	-2.13682	-0.333462	8.06713e-06	8.76966e-05		Potri.018G092100	-1.18008	-1.12223	1.13655	1.25353	1.39576e-08	1.79365e-07
Potri.003G088600	-1.16699	-0.0483125	-1.98104	-1.96495	8.09753e-06	8.79927e-05		Potri.003G087400	3.02004	3.4676	2.77023	1.96604	1.41426e-08	1.81574e-07
Potri.005G117800	-2.22423	0.171506	-1.64812	-6.775	8.19303e-06	8.88572e-05		Potri.016G017900	4.86524	4.08661	3.34356	2.80723	1.4165e-08	1.81778e-07
Potri.005G120500	-0.513448	0.62614	-1.38436	-3.84786	8.24799e-06	8.93837e-05		Potri.010G010600	3.83494	3.61075	7.23229	6.34063	1.45069e-08	1.85822e-07
Potri.011G059300	-1.31926	-0.661806	-2.13835	-0.110738	8.32835e-06	9.01983e-05		Potri.006G252200	3.35223	3.57179	1.80407	1.22909	1.5069e-08	1.92933e-07
Potri.008G110100	0.0883579	-0.806876	-2.01904	-0.325436	8.38271e-06	9.07026e-05		Potri.004G181100	3.57927	4.19417	2.14932	2.15029	1.50765e-08	1.9294e-07
Potri.019G006000	-2.59289	-1.01617	-3.17875	-4.56617	8.38911e-06	9.07366e-05		Potri.003G044100	5.26203	3.40118	2.14389	3.86742	1.50884e-08	1.93003e-07
Potri.013G056800	-0.323022	-1.50013	0.443435	0.617146	8.44004e-06	9.11812e-05		Potri.018G007300	3.27966	2.4467	1.81136	2.72365	1.54404e-08	1.97234e-07
Potri.016G130500	-1.58323	-1.15578	-0.160256	0.503005	8.54282e-06	9.21844e-05		Potri.010G189900	-1.68683	-1.20312	-1.87573	-2.77593	1.54924e-08	1.97807e-07
Potri.011G053200	-3.10317	-0.429773	-0.876395	-1.28006	8.58605e-06	9.2615e-05		Potri.004G197600	1.8644	1.1927	1.5581	3.42002	1.59628e-08	2.03253e-07
Potri.010G241700	-1.67688	-1.65202	0.193125	-0.540557	8.6324e-06	9.2971e-05		Potri.009G014300	3.21775	3.0371	3.86132	6.74505	1.65702e-08	2.10341e-07
Potri.010G214300	-2.22577	0.00797521	-1.63543	-0.491724	8.67676e-06	9.34127e-05		Potri.003G138600	4.32847	5.12275	3.36293	4.86755	1.66718e-08	2.11506e-07
Potri.003G143000	0.167405	-1.38186	0.93844	0.0938079	8.73794e-06	9.4035e-05		Potri.012G006300	2.50393	4.18418	2.15373	1.55416	1.66906e-08	2.11648e-07
Potri.001G284500	-1.46892	-0.70735	-3.43296	-2.22207	8.7893e-06	9.45146e-05		Potri.014G127700	3.98728	2.80512	3.03865	1.9919	1.70527e-08	2.15944e-07
Potri.017G055200	-1.95247	0.0281191	-0.754594	-1.68416	8.90467e-06	9.56445e-05		Potri.001G175700	-3.78103	-3.18671	-2.68133	-1.70335	1.73072e-08	2.18868e-07
Potri.006G261300	-0.846481	0.667786	-1.30911	-1.37313	9.07958e-06	9.72529e-05		Potri.010G198100	3.56073	3.74395	2.54842	2.63011	1.74081e-08	2.19844e-07
Potri.009G061700	0.171007	-0.276731	-1.8638	-2.10796	9.08095e-06	9.72529e-05		Potri.010G040900	1.99947	1.25865	2.72246	5.69025	1.77518e-08	2.23879e-07
Potri.018G099100	0.276965	-0.0722768	-0.608255	-4.24014	9.15168e-06	9.79578e-05		Potri.T006000	-2.89875	-4.35434	-1.87156	-2.57332	1.8175e-08	2.28905e-07
Potri.012G016600	-1.44399	-1.79984	-0.44197	-1.26632	9.34377e-06	9.9827e-05		Potri.016G082700	-5.89406	-2.78937	-1.9774	1.73242	1.85878e-08	2.33469e-07
Potri.009G051600	-1.62116	0.999688	-1.88211	-6.83324	9.40712e-06	0.000100422		Potri.014G152400	-4.00166	-2.72272	-1.91004	-3.30236	1.86422e-08	2.34046e-07
Potri.005G246600	-0.677474	-1.1846	-1.75109	0.454989	9.48091e-06	0.000101055		Potri.001G043100	-2.57447	-2.45458	-3.04829	-2.79131	1.88141e-08	2.35885e-07
Potri.006G007400	-1.85322	-0.938939	0.202479	0.000834749	9.49369e-06	0.000101152		Potri.017G130300	2.70857	2.08916	4.3082	4.74667	1.88926e-08	2.36656e-07
Potri.001G141100	-3.57887	-1.6825	-2.31653	-1.66078	9.60643e-06	0.000102314		Potri.001G288900	2.27096	-4.16628	-4.16628	-1.72833	1.90696e-08	2.38443e-07
Potri.016G016000	-1.43438	-1.11289	0.366737	0.115205	9.6743e-06	0.000102959		Potri.014G002600	-5.59665	-3.39513	-2.00835	-1.93187	1.91763e-08	2.39562e-07
Potri.006G040000	-1.88665	-0.906223	0.493213	0.116121	9.75777e-06	0.000103807		Potri.005G186200	3.57441	2.94595	2.01511	1.91377	1.93586e-08	2.41513e-07
Potri.017G098000	-1.53051	-4.96351	-5.31178	-4.94441	9.79356e-06	0.000104134		Potri.T000300	-6.32293	-6.32293	-6.32293	-3.02265	1.97533e-08	2.46053e-07
Potri.002G258100	-0.821893	0.634129	-6.34111	-1.01055	1.00521e-05	0.00010641		Potri.003G052000	3.06013	3.12861	1.48109	1.33783	1.97579e-08	2.46053e-07
Potri.002G109400	-2.51642	-1.07982	0.343864	0.242934	1.01137e-05	0.00010694		Potri.010G187900	2.11363	3.03405	2.03664	3.13185	2.01685e-08	2.50606e-07
Potri.008G115800	-1.55063	-1.59266	-4.1433	-1.17421	1.01511e-05	0.000107254		Potri.T112800	7.22561	5.11772	5.04338	4.22138	2.06965e-08	2.56592e-07
Potri.004G027600	-2.4229	0.671384	-2.01323	-1.16476	1.0249e-05	0.000108125		Potri.005G195600	4.33938	3.13959	4.1413	2.9074	2.11609e-08	2.61882e-07
Potri.010G167600	-0.648694	-1.46755	0.349481	0.360114	1.0249e-05	0.000108125		Potri.010G059900	4.75629	5.24628	4.40217	3.00575	2.20784e-08	2.72389e-07
Potri.006G041800	0.893446	0.642803	0.151502	-1.42039	1.03224e-05	0.000108817		Potri.016G125000	4.47428	4.69494	5.68325	2.10228	2.21111e-08	2.72671e-07
Potri.016G023100	0.252977	0.0263704	-1.92128	-0.00743732	1.0329e-05	0.000108845		Potri.015G031000	7.45851	7.04846	7.32773	5.75913	2.36981e-08	2.90865e-07
Potri.007G013300	-2.5241	0.551274	-0.480014	0.199988	1.03362e-05	0.00010888		Potri.019G041400	-2.80826	-2.91788	-3.24528	-1.51343	2.43992e-08	2.9811e-07
Potri.012G140200	-2.71365	-1.8331	-1.66179	-2.79681	1.0483e-05	0.000110068		Potri.001G276400	3.9123	4.32518	4.52344	2.09145	2.49701e-08	3.04282e-07
Potri.011G126400	-0.607026	-1.85057	0.837952	0.388082	1.04916e-05	0.0001101		Potri.001G298300	3.00166	-1.41561	3.30436	2.65565	2.53463e-08	3.08597e-07
Potri.001G376600	-0.547746	0.466454	-2.23093	-0.488927	1.05854e-05	0.000111043		Potri.005G012100	5.02148	3.78393	4.77179	3.79837	2.54378e-08	3.09575e-07
Potri.013G055600	-1.41255	-1.42842	-1.29966	-1.92705	1.06432e-05	0.000111523		Potri.006G254200	-2.41177	-1.33214	1.07924	1.32787	2.54777e-08	3.09925e-07
Potri.001G136600	-1.57563	-1.18604	0.0781501	0.0402069	1.07375e-05	0.000112427		Potri.001G023600	-2.37545	-2.37545	1.54957	4.92701	2.56935e-08	3.1217e-07
Potri.015G129000	-0.2462	0.827641	-1.01394	-0.812097	1.08774e-05	0.000113721		Potri.T072000	5.34727	7.31367	6.47117	4.52436	2.70586e-08	3.27864e-07
Potri.005G090600	-1.43105	-0.0704327	-2.25725	-2.65629	1.11472e-05	0.000115976		Potri.015G112800	-6.80336	-6.80336	-6.80336	-3.49994	2.70879e-08	3.28076e-07
Potri.005G217900	-5.87144	-3.99774	-3.32793	-5.87144	1.11874e-05	0.00011635		Potri.016G036900	-2.42066	-1.0918	-1.58254	-1.37516	2.85121e-08	3.43828e-07
Potri.014G075800	-1.79663	0.00875266	0.453955	0.345856	1.14124e-05	0.000118469		Potri.001G117000	-2.51917	-3.35502	-1.73763	-1.40508	2.85447e-08	3.44072e-07
Potri.005G019700	-0.0281341	0.695612	-1.24245	-2.98304	1.15028e-05	0.000119319		Potri.006G172400	-2.37353	-5.05189	-2.20777	-2.96294	2.86833e-08	3.45592e-07
Potri.014G173300	-0.482759	-0.660361	-2.91096	-0.251489	1.15842e-05	0.000120029		Potri.003G114100	-1.71723	1.52002	-2.2111	-4.06483	2.87018e-08	3.45665e-07
Potri.010G158300	-2.40955	-2.39132	-1.54975	-0.82772	1.16047e-05	0.000120197		Potri.006G016200	1.96948	2.6254	1.57862	2.54202	2.97299e-08	3.57582e-07
Potri.010G219000	-0.377704	-1.37538	-2.76524	-1.00286	1.16486e-05	0.000120562		Potri.005G013100	7.30222	5.26277	7.01086	4.98947	2.9932e-08	3.59546e-07
Potri.015G077400	-5.54099	-5.54099	-5.54099	-5.54099	1.16534e-05	0.000120567		Potri.016G006500	-3.05068	-1.32696	-1.63969	-1.00142	3.01931e-08	3.62526e-07
Potri.008G195200	0.18481	0.922705	-1.04125	-0.218989	1.16665e-05	0.000120657		Potri.013G090200	3.53056	2.50641	1.68941	1.43176	3.0444e-08	3.6475e-07
Potri.004G100000	-1.18029	-2.42481	-0.928436	-0.444974	1.16897e-05	0.000120808		Potri.006G008700	-2.76765	-4.4631	-3.28671	-7.56636	3.13874e-08	3.74761e-07
Potri.001G083300	-1.38305	-1.24806	0.121583	-0.841376	1.16994e-05	0.000120864		Potri.005G216700	2.80391	-1.54675	-3.79071	-1.3558	3.16832e-08	3.77806e-07
Potri.018G140300	0.503797	-0.402003	-1.58158	-0.154867	1.17242e-05	0.000121075		Potri.006G228800	-2.33397	-2.78443	-1.42259	-1.34528	3.23301e-08	3.8486e-07
Potri.001G436300	-1.83832	-1.53199	-1.38606	-1.21956	1.17479e-05	0.00012123		Potri.016G062700	4.54351	3.45037	-2.39308	2.38952	3.29613e-08	3.91703e-07
Potri.010G145000	-0.904343	-1.83347	0.158432	-0.43595	1.17666e-05	0.000121378		Potri.008G098800	-2.07855	-3.41758	-2.76277	-1.3035	3.34024e-08	3.96196e-07
Potri.016G002800	-0.63141	0.431918	-1.7987	-0.947518	1.19471e-05	0.000123148		Potri.005G007600	5.49597	5.17399	5.89521	4.73119	3.43911e-08	4.07233e-07
Potri.T003800	-6.70057	-3.50751	-2.71324	-2.36164	1.19949e-05	0.000123596		Potri.004G168600	-2.67985	-1.75438	1.53717	2.99095	3.45447e-08	4.08771e-07
Potri.011G098800	-2.26391	-0.661471	-0.495057	-0.342553	1.2003e-05	0.000123633		Potri.006G236900	-7.07944	-3.98053	-3.17214	-2.08555	3.46031e-08	4.09289e-07
Potri.012G015600	-1.91644	-1.47679	-2.19561	-1.52257	1.21126e-05	0.000124625		Potri.005G048700	4.15002	1.28685	2.06936	1.4742	3.47748e-08	4.11144e-07
Potri.006G149500	-0.15224	-1.68076	-1.32056	-0.191066	1.21514e-05	0.000124977		Potri.001G214600	5.26332	4.66482	2.22554	4.89123	3.559e-08	4.20425e-07
Potri.009G162700	-6.49983	-1.57728	0.257493	-0.79766	1.21704e-05	0.000125126		Potri.005G256300	-5.26611	-3.02293	-5.26611	1.21893	3.60954e-08	4.25491e-07
Potri.010G107400	-0.557404	0.599249	-1.40752	-1.93756	1.21954e-05	0.000125337		Potri.019G088900	7.30581	5.13004	6.76433	4.52374	3.70335e-08	4.35625e-07
Potri.007G030500	-2.37879	-1.17627	-0.559907	-0.604807	1.22177e-05	0.000125519		Potri.014G001500	-2.19063	-3.10241	-2.90707	-1.40788	3.71061e-08	4.36294e-07
Potri.018G069300	-2.64078	-0.758424	-3.97355	-6.51676	1.23477e-05	0.000126644		Potri.011G102800	2.07991	-1.65135	3.24681	2.10409	3.77572e-08	4.432e-07
Potri.001G066400	-2.74212	-0.22694	-1.37932	-0.792672	1.24436e-05	0.000127558		Potri.018G089300	-2.97509	-2.49316	-8.31304	-1.75865	3.81849e-08	4.47843e-07
Potri.008G156300	0.774126	-0.192905	-1.37675	-0.192151	1.2466e-05	0.000127741		Potri.015G061600	7.7773	6.83251	7.52101	6.40023	3.82285e-08	4.48165e-07
Potri.017G137200	-1.233	0.443801	-1.58124	-1.43289	1.25498e-05	0.000128388		Potri.005G198000	-6.13201	-3.04334	1.17572	1.96319	3.9741e-08	4.64525e-07
Potri.014G025100	-1.60202	0.942226	-0.155995	-0.382905	1.28214e-05	0.000130709		Potri.006G102800	3.71037	2.3249	2.22355	1.43757	4.01728e-08	4.68981e-07
Potri.015G044800	-1.55449	-1.66137	0.912353	-0.0586711	1.2858e-05	0.000130987		Potri.008G094300	-1.365	2.38802	-1.48131	-1.19461	4.0237e-08	4.69533e-07
Potri.004G059400	-1.81952	-0.536203	-2.08345	-3.35106	1.29227e-05	0.000131598		Potri.002G187400	5.56545	4.0527	5.61686	3.73643	4.0747e-08	4.75042e-07
Potri.006G101800	-0.160586	-1.05396	-1.78816	0.0682732	1.29652e-05	0.000131934		Potri.006G011900	-2.06776	-3.73569	-3.6888	-1.57644	4.07604e-08	4.75042e-07
Potri.001G463100	-3.11451	-0.861832	-0.341417	-1.28246	1.31947e-05	0.000133927		Potri.006G119300	-8.19936	-3.10016	-1.13727	-1.95386	4.10376e-08	4.78072e-07
Potri.008G069600	-0.53098	-1.94433	0.213615	-0.515255	1.32281e-05	0.000134217		Potri.014G094400	-1.40117	1.42649	-1.48825	-2.53779	4.13411e-08	4.81003e-07
Potri.003G089900	-2.09037	-0.886935	-0.326039	-0.488656	1.32887e-05	0.000134685		Potri.002G237200	3.08945	2.02679	1.30811	1.85322	4.165e-08	4.83787e-07
Potri.013G011800	0.225705	0.601151	-1.64066	-0.498139	1.33076e-05	0.000134827		Potri.018G029500	1.7972	2.05239	2.75516	2.63005	4.2483e-08	4.92229e-07
Potri.011G134000	-2.81955	-2.00944	-3.62766	-3.61586	1.33687e-05	0.000135398		Potri.005G133800	2.67773	1.75134	2.90465	1.68275	4.28245e-08	4.95979e-07
Potri.017G118400	-3.23309	0.487532	0.998142	-0.243305	1.34505e-05	0.000136079		Potri.017G026100	-1.01577	-1.94938	-2.99575	-3.6059	4.28641e-08	4.96231e-07
Potri.T088800	-5.05319	0.987355	-5.05319	-0.37781	1.34507e-05	0.000136079		Potri.002G002900	-4.17654	-1.09863	1.94544	2.79501	4.28879e-08	4.963e-07
Potri.004G059700	-3.57713	0.0224563	-0.19478	-0.244921	1.34896e-05	0.000136423		Potri.002G065600	4.32508	2.85514	1.68575	2.14146	4.29117e-08	4.96368e-07
Potri.T051300	0.680161	0.576623	-1.7229	0.193151	1.35002e-05	0.000136445		Potri.016G143400	1.60421	2.43588	3.39201	2.27154	4.35063e-08	5.02411e-07
Potri.005G128800	-0.811883	-1.13603	0.500008	0.570741	1.35015e-05	0.000136445		Potri.003G079000	-3.51577	-6.02444	-4.00639	-2.36886	4.3601e-08	5.02942e-07
Potri.013G010800	0.533877	0.771362	-2.02829	0.0751647	1.35552e-05	0.000136938		Potri.009G112000	4.0443	1.6452	3.53247	2.11062	4.37773e-08	5.04492e-07
Potri.T118900	0.904354	0.124415	-1.32246	-1.01948	1.36585e-05	0.000137931		Potri.005G049600	-3.52603	-4.02145	-2.41213	-2.69208	4.47111e-08	5.14187e-07
Potri.002G073500	-5.88954	-5.88954	-5.88954	-2.38785	1.36964e-05	0.000138178		Potri.006G112600	2.25	1.72783	1.49814	3.2118	4.61952e-08	5.29938e-07
Potri.004G197500	0.254393	0.757547	-0.957078	-1.80798	1.38018e-05	0.000139026		Potri.006G043100	-1.78178	-1.92213	-2.67057	-2.31542	4.75055e-08	5.43177e-07
Potri.011G034400	-2.64562	-2.16672	-1.09083	-1.61219	1.3847e-05	0.000139383		Potri.001G213300	6.65501	7.19995	6.6376	5.53163	4.86133e-08	5.54248e-07
Potri.006G247600	-1.997	0.378557	-1.45553	-2.50948	1.39887e-05	0.000140654		Potri.011G146500	2.97851	1.91676	2.87951	2.55574	5.22454e-08	5.89851e-07
Potri.003G173400	-0.226671	0.0191856	-2.59305	-1.23528	1.41596e-05	0.000142167		Potri.015G072200	-1.97349	-4.77861	-3.14667	-2.52281	5.26385e-08	5.94048e-07
Potri.006G226700	-2.26913	-0.921168	-0.440609	-0.841244	1.42673e-05	0.000143197		Potri.018G126300	-1.92935	-3.51419	-2.05348	-2.7169	5.3736e-08	6.0545e-07
Potri.005G123200	-0.947137	-0.210024	-2.10141	-0.789845	1.43463e-05	0.000143773		Potri.008G154500	-5.43122	-1.81768	-3.66865	-2.53996	5.37784e-08	6.05683e-07
Potri.006G208300	-1.43957	-1.7617	-0.165808	-0.723666	1.43504e-05	0.000143773		Potri.006G233600	-4.49463	1.76464	-4.49463	-4.49463	5.38145e-08	6.05844e-07
Potri.006G040600	-0.655688	-0.907234	-2.58181	-0.663647	1.43748e-05	0.000143913		Potri.001G451900	4.69808	5.6937	2.31344	1.22249	5.4874e-08	6.17022e-07
Potri.002G132900	0.36455	-0.508507	0.66682	-3.49758	1.4678e-05	0.00014658		Potri.001G131300	1.32071	1.64903	2.60163	2.65869	5.51152e-08	6.19196e-07
Potri.015G106700	-1.85361	0.558225	-0.382419	0.450159	1.50892e-05	0.00015031		Potri.007G044800	3.91968	2.19673	2.86275	4.05359	5.63459e-08	6.31019e-07
Potri.013G108200	-2.56224	-1.96816	0.297	-0.853022	1.52086e-05	0.000151445		Potri.010G137000	2.77797	2.66833	3.04865	3.38094	5.8934e-08	6.58413e-07
Potri.001G099700	-1.96306	0.395374	0.172802	-0.702169	1.52604e-05	0.000151907		Potri.004G117700	-5.51409	-3.28124	1.10712	3.3735	5.91532e-08	6.60331e-07
Potri.010G168900	-2.27308	-0.653563	-2.44467	-1.56966	1.52943e-05	0.000152097		Potri.008G197400	1.65603	2.94952	3.51926	1.28094	6.03289e-08	6.72644e-07
Potri.003G129600	-0.0982259	0.0800589	-0.798691	-6.91754	1.53188e-05	0.000152231		Potri.019G010600	-2.45779	-3.14652	-2.90104	-3.67372	6.05788e-08	6.75159e-07
Potri.008G174400	-2.40904	-0.571881	-0.828272	-0.804447	1.53204e-05	0.000152231		Potri.019G011300	-1.63288	-2.85014	-3.19688	-1.56965	6.18896e-08	6.88389e-07
Potri.018G115100	-0.998816	-1.65196	0.259089	-0.653089	1.54304e-05	0.000153161		Potri.011G045000	2.15303	-1.26469	1.45505	2.69107	6.29897e-08	6.99403e-07
Potri.009G105200	-2.1193	-0.471106	-0.792238	-1.01944	1.55667e-05	0.000154459		Potri.T162300	3.14096	2.3215	3.4745	2.26454	6.32428e-08	7.01129e-07
Potri.010G149600	-1.03362	0.874261	-0.333139	-1.72257	1.55759e-05	0.000154495		Potri.010G080600	-2.7667	-1.52875	-1.18097	-1.71476	6.33517e-08	7.01592e-07
Potri.001G118100	0.9183	-0.0324505	-1.27101	0.25693	1.57075e-05	0.000155484		Potri.014G071700	-1.09247	-1.78902	1.67047	3.46051	6.44803e-08	7.12185e-07
Potri.011G153800	-2.86823	0.298821	0.215223	-1.64135	1.61142e-05	0.000158704		Potri.019G027800	-2.58907	-4.97358	-1.50835	-2.18358	6.44902e-08	7.12185e-07
Potri.003G087300	0.316458	0.872912	-2.3152	-0.823563	1.62123e-05	0.000159412		Potri.008G070400	3.29758	3.39073	2.32536	2.37066	6.48373e-08	7.1545e-07
Potri.006G143800	-1.53877	0.317437	-1.017	-0.685967	1.62147e-05	0.000159412		Potri.002G070500	3.28305	4.06475	2.7938	3.03379	6.59261e-08	7.26023e-07
Potri.008G156700	-1.32346	0.164298	-0.843663	-4.19828	1.63175e-05	0.00016031		Potri.001G465700	-3.44561	-6.18475	-3.62953	-3.89711	6.60752e-08	7.27377e-07
Potri.006G251400	-1.33227	0.357311	-2.22338	-2.15264	1.63411e-05	0.000160485		Potri.018G149700	1.26871	2.84033	3.17124	1.74833	6.6767e-08	7.3383e-07
Potri.016G038900	-2.09004	-0.977986	-2.20873	-0.672059	1.65086e-05	0.000161902		Potri.004G194000	4.77605	3.07745	7.24496	5.96023	6.92461e-08	7.58677e-07
Potri.001G254100	-1.18153	0.833604	-1.4799	-5.71859	1.65544e-05	0.000162293		Potri.004G220100	4.51619	4.9886	3.46812	3.76808	6.93829e-08	7.59877e-07
Potri.005G177500	-0.076483	-1.98276	0.0552078	0.0450001	1.66417e-05	0.000163092		Potri.T113700	3.02776	-1.52038	-3.76412	1.41584	7.05148e-08	7.71058e-07
Potri.001G321700	-0.142068	0.639486	-3.01253	-1.62525	1.67498e-05	0.000163979		Potri.012G054400	1.06064	1.21588	3.02351	5.31056	7.12152e-08	7.77799e-07
Potri.008G112800	0.403932	0.255603	-2.14549	-0.253736	1.68494e-05	0.000164896		Potri.T108000	5.22786	5.48577	5.09323	5.45903	7.12465e-08	7.77835e-07
Potri.009G030800	-1.2532	-1.15249	-0.439429	0.678077	1.69093e-05	0.000165424		Potri.014G110400	-1.21635	1.12654	-1.36998	-1.5272	7.33436e-08	7.98222e-07
Potri.004G200100	-0.986322	-1.75019	-0.501704	0.0989467	1.69464e-05	0.000165677		Potri.003G058600	-1.56252	-1.08292	1.08263	3.0714	7.46724e-08	8.11095e-07
Potri.002G239600	-0.902817	0.120355	-1.77797	-2.05682	1.70037e-05	0.000166037		Potri.003G187000	2.23533	2.12702	3.26624	1.30541	7.67076e-08	8.31902e-07
Potri.006G077200	0.951823	0.297857	-1.3717	0.49859	1.70077e-05	0.000166037		Potri.008G211000	3.21384	2.59545	2.44337	3.89536	7.73468e-08	8.3818e-07
Potri.017G007600	-3.37297	-0.886172	-2.36109	0.014534	1.72027e-05	0.000167823		Potri.010G059500	3.1649	3.55264	2.56378	2.80202	7.81304e-08	8.46012e-07
Potri.006G036000	-2.39341	-0.924632	-4.35218	0.565207	1.73015e-05	0.000168668		Potri.017G050300	3.56932	3.03056	3.44347	5.94359	7.81689e-08	8.46099e-07
Potri.005G196700	-0.311765	0.0992731	-2.43272	-1.12418	1.73648e-05	0.000169108		Potri.013G089200	-6.93319	-3.82203	-6.93319	-6.93319	7.92039e-08	8.56969e-07
Potri.015G045200	-3.11963	-0.0575244	-0.327193	0.91261	1.73883e-05	0.000169278		Potri.002G080700	-1.65814	2.07155	-1.57153	-5.48575	7.93089e-08	8.5777e-07
Potri.013G012300	-1.83002	-2.55303	-1.55489	-2.70007	1.74322e-05	0.000169646		Potri.008G106500	-1.61754	-1.09732	-2.38848	-2.71084	8.02258e-08	8.67013e-07
Potri.011G151300	-1.39763	-1.24298	-0.278359	-3.10561	1.74902e-05	0.000170066		Potri.012G069800	4.97106	4.07072	4.74295	2.64195	8.16966e-08	8.8017e-07
Potri.001G068600	-2.07548	-0.578862	-0.278968	-0.540874	1.74937e-05	0.000170066		Potri.015G059800	2.61793	3.68275	2.91767	2.30036	8.19148e-08	8.81837e-07
Potri.007G132700	-2.33837	-1.73049	-1.37201	-0.91437	1.78449e-05	0.000173239		Potri.005G073300	-2.67564	-1.89689	1.01625	2.58353	8.39398e-08	9.02588e-07
Potri.016G009700	-1.24954	-1.6259	0.472517	0.141212	1.7996e-05	0.000174523		Potri.006G124800	2.98523	2.38258	2.1667	2.17591	8.56733e-08	9.2016e-07
Potri.004G031200	-1.63036	-0.858026	-0.808774	0.569852	1.80446e-05	0.000174933		Potri.006G239800	-6.35832	-6.35832	-3.86674	-1.35689	8.6216e-08	9.24561e-07
Potri.013G144000	-2.18887	-1.69709	-0.798455	-0.675748	1.81276e-05	0.000175677		Potri.009G027700	3.72375	2.6707	3.31601	4.60823	8.6854e-08	9.30325e-07
Potri.012G110800	-0.892791	0.179497	-2.84095	-2.48251	1.81451e-05	0.000175778		Potri.007G055400	-2.3793	3.11632	4.17742	5.07418	8.81843e-08	9.43121e-07
Potri.005G212400	0.0076291	0.729672	-2.05974	-0.98398	1.82986e-05	0.000176965		Potri.005G162700	-4.26066	-6.36831	-6.36831	-3.0683	8.86578e-08	9.47455e-07
Potri.002G199900	-2.33224	0.0520374	-0.474584	-0.845986	1.83935e-05	0.000177759		Potri.011G031800	1.30914	1.27756	5.32005	2.61085	8.96884e-08	9.56998e-07
Potri.002G005500	-1.9583	0.482496	-1.64415	-1.12757	1.84261e-05	0.000178012		Potri.018G105000	5.47209	4.0011	6.30736	7.35153	9.00769e-08	9.60775e-07
Potri.012G060300	-2.4907	-1.12672	-1.52896	0.0370239	1.8585e-05	0.000179237		Potri.008G083600	-3.43172	-2.29829	-2.09967	-1.22849	9.24622e-08	9.84327e-07
Potri.016G036000	-1.41474	-0.742093	-1.98242	-0.966135	1.88557e-05	0.000181659		Potri.019G038900	-6.29012	-6.29012	-6.29012	-6.29012	9.30396e-08	9.89716e-07
Potri.005G061900	-2.39415	-2.13975	-2.09766	-0.638549	1.91192e-05	0.00018388		Potri.007G054200	3.98774	2.91301	1.50312	1.98968	9.50947e-08	1.00926e-06
Potri.006G261200	-3.0823	-1.90175	-2.68934	-2.96412	1.94758e-05	0.000186858		Potri.015G030100	-3.27006	-3.27006	-3.27006	3.66151	9.51962e-08	1.00995e-06
Potri.003G005800	-1.51698	-1.57785	-0.406358	-0.359989	1.94913e-05	0.000186942		Potri.007G002100	7.14514	6.89236	7.72355	7.18906	9.75366e-08	1.03242e-06
Potri.005G246700	-2.73646	-0.527689	0.152117	-0.434999	1.9547e-05	0.000187347		Potri.T167100	5.08027	5.46847	7.70295	6.80514	9.84502e-08	1.04169e-06
Potri.010G102900	-3.06885	-1.64871	-1.31779	0.727456	1.95671e-05	0.000187436		Potri.003G162500	4.05581	1.05815	3.24495	2.95065	9.8973e-08	1.04643e-06
Potri.018G053600	-2.48285	-0.613932	-0.00814862	-0.888452	1.97199e-05	0.00018855		Potri.006G050800	4.94882	4.78217	3.05643	4.86133	1.06215e-07	1.11494e-06
Potri.002G096100	-2.5644	-0.313223	-0.637678	-2.11261	1.97894e-05	0.00018902		Potri.002G208700	-7.0022	-4.76224	-4.50541	-2.48486	1.08669e-07	1.13597e-06
Potri.016G071900	-2.10514	-0.166952	0.248035	-0.971333	2.04694e-05	0.000194781		Potri.002G069400	-2.08223	-1.535	1.5418	3.3426	1.10243e-07	1.15114e-06
Potri.018G105200	-0.450979	-1.68102	0.768449	0.11331	2.0524e-05	0.000195234		Potri.001G451800	-7.02399	-7.02399	-1.0347	1.01101	1.19952e-07	1.24178e-06
Potri.001G305800	-2.84669	-0.624354	-0.423969	-0.520458	2.05428e-05	0.000195345		Potri.005G019600	-1.40673	-3.37925	-3.3265	-1.2223	1.20201e-07	1.24389e-06
Potri.004G089100	-1.61472	-0.701145	-1.42961	-1.89409	2.09608e-05	0.000198914		Potri.001G422600	-3.48101	-2.85946	-3.76606	-1.4066	1.20719e-07	1.24879e-06
Potri.010G156600	-2.00042	-2.77336	-1.70878	-5.62993	2.11115e-05	0.000200207		Potri.011G115600	3.35593	2.86123	3.9968	4.36235	1.24682e-07	1.28501e-06
Potri.012G068500	-2.12904	-1.11152	-0.81872	-1.13807	2.11971e-05	0.000200951		Potri.008G046100	2.07167	2.06201	2.72177	1.58288	1.25253e-07	1.29041e-06
Potri.017G030400	-2.47228	-1.40517	-0.0883079	-0.619386	2.12768e-05	0.000201569		Potri.019G083200	-1.41059	-2.04542	-3.25836	-1.91083	1.28978e-07	1.32486e-06
Potri.017G044500	-3.70746	-2.04427	-1.37764	-1.57047	2.13275e-05	0.000201981		Potri.006G092300	2.38948	3.06915	4.07541	2.87967	1.29259e-07	1.32726e-06
Potri.008G019200	0.671262	0.865601	-1.79382	-0.07154	2.13625e-05	0.000202243		Potri.013G157400	-2.8029	-4.89915	2.46715	1.49681	1.33462e-07	1.36789e-06
Potri.002G245700	0.467938	0.667926	-1.55656	-2.49933	2.14008e-05	0.000202474		Potri.017G010800	-2.24122	-3.41369	-2.01443	-1.06363	1.34753e-07	1.37909e-06
Potri.001G455700	-1.23869	-1.8082	-0.717931	0.547196	2.14014e-05	0.000202474		Potri.002G246200	-2.35066	-4.12473	-3.81986	-3.57404	1.35024e-07	1.38034e-06
Potri.005G197700	-0.156195	-1.42723	0.577989	0.160544	2.14235e-05	0.000202614		Potri.017G009400	-5.18047	-5.53647	-1.98073	-2.64167	1.37328e-07	1.40286e-06
Potri.004G223200	-1.7141	-0.370747	-1.51929	-2.4114	2.16675e-05	0.000204574		Potri.011G057100	6.89606	6.62116	7.01527	4.52185	1.39116e-07	1.41799e-06
Potri.012G104100	-0.702152	0.511169	-1.72029	-0.304917	2.16853e-05	0.000204674		Potri.005G059900	6.15086	5.58676	5.36192	3.86426	1.39489e-07	1.41971e-06
Potri.004G186000	-2.84692	-2.61285	-2.46346	-1.20396	2.19527e-05	0.000206917		Potri.001G069000	2.44088	1.01524	4.02795	3.74377	1.41801e-07	1.44166e-06
Potri.006G250100	-0.337117	0.764955	-1.09967	-4.53598	2.21622e-05	0.000208609		Potri.002G041800	-2.51658	-2.90168	-1.16669	-1.09569	1.42674e-07	1.44948e-06
Potri.005G129600	-1.77255	-0.449455	-4.62041	-2.03388	2.2692e-05	0.000212877		Potri.009G058800	-3.01766	-1.69852	1.1048	3.28963	1.44395e-07	1.46589e-06
Potri.001G407900	-1.78838	-1.83615	0.64615	0.257483	2.28149e-05	0.000213886		Potri.019G030200	-1.9254	-1.93021	-3.49434	-1.92331	1.47778e-07	1.49532e-06
Potri.T178500	0.157488	0.49185	-1.97615	-2.1047	2.29134e-05	0.000214592		Potri.015G042000	7.94626	7.09853	4.29563	6.05319	1.47891e-07	1.49575e-06
Potri.001G439600	-0.655141	-1.30659	0.469939	0.606283	2.33615e-05	0.000218231		Potri.002G165700	3.44078	2.25614	5.8694	7.01626	1.47982e-07	1.49575e-06
Potri.002G178000	-3.16945	-0.71096	-1.24584	-2.61252	2.33728e-05	0.000218235		Potri.006G069500	-3.57508	-1.37785	-1.66612	-3.03033	1.48351e-07	1.49893e-06
Potri.001G399600	-0.967331	-1.68805	0.311557	0.243186	2.37177e-05	0.000221085		Potri.010G059800	3.46919	3.57619	2.63329	2.18076	1.56555e-07	1.57895e-06
Potri.003G204400	-1.27836	-0.682996	0.965593	-0.0269857	2.38868e-05	0.000222364		Potri.T178900	5.48705	2.26614	6.77903	6.08813	1.57368e-07	1.586e-06
Potri.001G268300	-5.76432	-3.88013	-5.76432	-3.19585	2.4209e-05	0.000224688		Potri.011G129100	1.84157	3.00428	1.50023	2.8676	1.58507e-07	1.59632e-06
Potri.010G127000	-1.28264	-0.574326	0.918247	-0.808152	2.4318e-05	0.000225473		Potri.T165000	6.53489	6.80989	3.90309	6.90966	1.60056e-07	1.61018e-06
Potri.014G018900	-1.39018	-0.799173	0.661242	-1.39042	2.47595e-05	0.000228958		Potri.002G184000	-1.01106	-1.25852	-2.59995	-1.82054	1.6128e-07	1.62015e-06
Potri.006G005500	-2.65034	-0.995179	-0.818195	-0.264969	2.49665e-05	0.000230719		Potri.013G014300	2.42225	1.69487	-1.76703	1.95149	1.6141e-07	1.62086e-06
Potri.008G186500	-1.62464	-1.46688	0.0694323	-0.465963	2.50694e-05	0.000231551		Potri.004G033500	2.95754	3.08715	1.59092	1.82981	1.68374e-07	1.68532e-06
Potri.013G145300	0.327966	0.164341	-2.57833	-0.171676	2.50732e-05	0.000231551		Potri.005G054400	2.25458	3.06654	1.28292	1.58712	1.68522e-07	1.68619e-06
Potri.001G003400	-1.69951	-0.985278	0.676263	0.0292435	2.54638e-05	0.000234703		Potri.018G100300	-4.12539	-4.12539	1.50039	3.79953	1.78545e-07	1.78519e-06
Potri.014G197300	-3.40432	0.990668	0.21397	0.124902	2.57233e-05	0.000236848		Potri.002G236700	3.81791	2.25645	4.62193	7.1209	1.89114e-07	1.88139e-06
Potri.002G188100	-1.73812	-0.970449	0.236518	-1.18655	2.57646e-05	0.000237151		Potri.008G176700	-6.31638	-3.21456	-6.31638	-6.31638	1.89884e-07	1.88771e-06
Potri.010G210000	-1.94724	-0.905612	-0.628499	-0.868342	2.58369e-05	0.000237737		Potri.014G020500	2.99875	2.6319	1.36917	1.25378	1.91813e-07	1.90552e-06
Potri.010G053500	-1.91814	-1.67711	-1.52405	-0.534805	2.58662e-05	0.000237928		Potri.018G113400	-1.97476	-1.88019	-1.42576	-1.23234	1.92238e-07	1.90905e-06
Potri.004G202900	-0.492286	-2.00743	0.902534	0.320896	2.60715e-05	0.000239579		Potri.011G134000	-5.01436	-3.51265	-3.20585	-3.27605	1.92506e-07	1.91104e-06
Potri.015G087800	-2.98761	-0.259192	-1.08906	-3.69988	2.61188e-05	0.000239776		Potri.002G104400	4.35536	2.80846	2.16562	3.7232	1.982e-07	1.96265e-06
Potri.005G025300	-1.69948	-0.457535	-2.12421	-1.47986	2.63789e-05	0.000241686		Potri.013G143100	-2.7502	-4.41759	-1.90771	-2.58506	1.98712e-07	1.96702e-06
Potri.019G014700	-0.478436	-0.949614	-2.82676	-0.205511	2.64345e-05	0.000242037		Potri.T090100	1.95148	1.64384	3.84171	2.05488	1.99178e-07	1.97093e-06
Potri.018G107800	-1.28958	-0.588227	0.844091	-0.314793	2.64811e-05	0.000242384		Potri.019G052300	-3.35138	-6.28371	-6.28371	-3.84558	2.01143e-07	1.98967e-06
Potri.016G068300	-1.11665	0.222497	-1.95437	-0.794281	2.67397e-05	0.000244189		Potri.001G148900	1.25689	2.9239	3.45577	2.61034	2.01622e-07	1.99369e-06
Potri.005G127300	-1.51541	-1.41154	0.701492	-0.511247	2.6775e-05	0.000244432		Potri.004G160800	-2.11998	-1.65762	-2.16052	-2.062	2.02356e-07	2.00025e-06
Potri.004G048600	-0.554446	-0.719034	-2.15061	-0.679239	2.72377e-05	0.000248412		Potri.014G100200	3.46281	2.33678	2.11618	2.46455	2.05098e-07	2.02447e-06
Potri.011G167700	-1.3563	-0.889629	-0.736735	0.696145	2.74553e-05	0.000250233		Potri.019G099200	4.8624	1.92362	3.83914	2.39374	2.07708e-07	2.04733e-06
Potri.001G144300	-1.41595	-1.47488	0.437637	-1.17401	2.80376e-05	0.000255205		Potri.008G014600	3.82085	3.21754	2.98507	1.73943	2.21358e-07	2.17263e-06
Potri.016G138500	-1.68518	-0.342232	0.206701	-0.320945	2.82116e-05	0.000256533		Potri.003G196600	6.97824	7.37095	6.20784	6.96216	2.27333e-07	2.22342e-06
Potri.T069600	-5.34128	-5.34128	-5.34128	-5.34128	2.82301e-05	0.000256533		Potri.T159700	-4.94394	-1.8664	1.51024	1.84285	2.27943e-07	2.2286e-06
Potri.005G231100	0.465634	0.461917	-1.33926	-0.321823	2.82337e-05	0.000256533		Potri.006G208100	2.8328	2.04128	3.76788	4.81292	2.35228e-07	2.29191e-06
Potri.003G140400	-1.91213	-1.28167	-0.41569	-0.436881	2.82387e-05	0.000256533		Potri.015G033600	-1.68851	1.33108	-3.1784	-5.19189	2.35341e-07	2.29191e-06
Potri.006G003000	-2.2968	-0.645143	-0.774578	-1.29353	2.83162e-05	0.000257154		Potri.008G132600	-2.66838	-4.22077	1.57644	3.84682	2.35409e-07	2.29191e-06
Potri.004G218500	-2.60111	-1.98179	-0.194183	-0.473893	2.84369e-05	0.000258165		Potri.005G148400	3.51936	3.64458	-2.37832	5.40552	2.39338e-07	2.3261e-06
Potri.013G124900	-1.76508	-1.40809	0.480987	0.06304	2.87258e-05	0.000260533		Potri.014G073800	-1.57347	-2.62138	-1.96856	-1.10351	2.40479e-07	2.33555e-06
Potri.014G020700	-3.67191	-0.785639	-0.239373	-0.0344971	2.90097e-05	0.000262766		Potri.002G164400	3.58217	3.58108	2.20092	3.99879	2.43724e-07	2.36294e-06
Potri.011G145500	-0.549098	0.265629	-1.87527	-0.46838	2.92298e-05	0.000264502		Potri.017G061800	3.25363	2.50164	1.74412	3.13575	2.44949e-07	2.37316e-06
Potri.014G184400	-5.52367	-3.64935	-5.52367	-5.52367	2.93801e-05	0.00026537		Potri.006G264800	-2.12006	-1.91299	-1.97836	-1.04531	2.50574e-07	2.42512e-06
Potri.001G252500	-1.72964	-1.34649	0.129728	-0.213	2.93912e-05	0.00026537		Potri.003G115200	3.54148	3.50038	3.05793	2.35235	2.52191e-07	2.43738e-06
Potri.005G009300	-3.15013	-0.857953	-0.0707804	0.642839	2.93924e-05	0.00026537		Potri.012G057800	-2.38217	-3.32256	-7.31242	-4.01077	2.52678e-07	2.44123e-06
Potri.005G241200	-1.28131	0.833532	-1.03384	-0.0144	2.94653e-05	0.000265856		Potri.003G138100	2.92368	3.84983	2.31765	1.91431	2.64558e-07	2.54628e-06
Potri.006G105700	-1.09644	0.492768	-1.6659	-1.5392	2.95571e-05	0.000266597		Potri.013G039300	6.15858	4.31035	5.59043	4.46341	2.67413e-07	2.57287e-06
Potri.006G003900	-1.71062	-0.384661	-2.13484	-0.589761	2.95916e-05	0.000266822		Potri.002G016500	3.45408	3.35758	1.54409	1.57635	2.67743e-07	2.57515e-06
Potri.001G297300	-1.61153	-0.766537	-2.32797	-0.9209	3.01023e-05	0.000271164		Potri.001G053100	5.33929	3.26381	2.87621	3.10412	2.69663e-07	2.59272e-06
Potri.008G151900	-2.11288	-1.10224	-0.525027	-0.358372	3.01312e-05	0.000271249		Potri.010G212800	-3.67936	-3.92117	-1.60679	-3.00647	2.75074e-07	2.64018e-06
Potri.017G059000	0.581744	-0.446846	-1.60707	0.29776	3.02467e-05	0.000272201		Potri.015G040400	2.7761	5.01733	5.27118	2.83397	2.80038e-07	2.6835e-06
Potri.006G176700	-1.33134	-0.0684246	-0.339017	-2.00715	3.03717e-05	0.000272991		Potri.T053800	-2.797	-1.55155	-7.17531	-3.88254	2.8613e-07	2.73684e-06
Potri.014G160100	-0.0500091	0.799465	-2.19436	-3.06658	3.03734e-05	0.000272991		Potri.003G178100	-2.66484	-2.5793	-5.76414	-2.09107	2.86317e-07	2.73769e-06
Potri.006G173400	0.682862	-3.7067	-0.601853	-0.458181	3.05774e-05	0.000274556		Potri.001G441400	4.37489	3.27555	5.49434	2.96359	2.88464e-07	2.75727e-06
Potri.002G045000	0.221375	-0.646577	-0.263269	-2.0705	3.07626e-05	0.000275952		Potri.001G343600	-1.68211	-1.88826	-1.80059	-2.36664	2.89878e-07	2.76984e-06
Potri.017G141900	-1.6825	-0.60044	-3.89557	-0.0176606	3.09254e-05	0.000277059		Potri.015G045300	2.71843	3.85857	1.60401	2.02447	2.91727e-07	2.78559e-06
Potri.012G015400	-0.10491	0.596293	-2.11241	-0.722706	3.11015e-05	0.000278007		Potri.017G045100	3.37519	3.97187	2.78084	4.26182	2.92732e-07	2.79422e-06
Potri.011G030900	-1.54076	-1.89273	-1.11629	-0.0195845	3.14949e-05	0.000281073		Potri.008G219200	3.52243	4.37602	3.31837	3.5827	2.97048e-07	2.83056e-06
Potri.018G085800	-1.14416	0.287595	-2.37661	-1.36717	3.15788e-05	0.000281642		Potri.014G017300	3.09366	3.00928	2.92698	3.12346	3.02914e-07	2.88152e-06
Potri.010G035000	-0.376063	-0.438581	-1.5839	-1.57359	3.26009e-05	0.000290015		Potri.005G195700	2.79334	3.55277	3.48027	2.651	3.04129e-07	2.89209e-06
Potri.003G058800	-2.24152	-0.314815	-0.468524	-1.04794	3.27987e-05	0.000291588		Potri.002G168200	3.35066	1.16016	2.36369	1.42402	3.07101e-07	2.91667e-06
Potri.001G190700	-1.76228	-0.472502	0.665854	-0.209279	3.30961e-05	0.000293951		Potri.014G155000	3.62622	3.61787	2.26524	1.58506	3.14779e-07	2.98214e-06
Potri.016G036900	-2.0051	-1.34516	-0.45673	-0.611985	3.31578e-05	0.000294311		Potri.012G130400	-2.06378	-2.18883	-2.18879	1.02294	3.2826e-07	3.1014e-06
Potri.005G113100	-2.81847	-0.677669	-1.1267	-0.449287	3.34069e-05	0.000295863		Potri.006G126800	-2.05921	-1.99368	2.18715	2.46436	3.29298e-07	3.11015e-06
Potri.013G015000	0.112011	0.00188088	-2.70366	-0.506387	3.40364e-05	0.000300102		Potri.002G119700	-3.15662	-2.95499	-2.57254	-2.69097	3.32699e-07	3.13907e-06
Potri.010G168800	-0.342385	0.580973	-1.38784	-1.55294	3.44074e-05	0.000302703		Potri.001G283700	5.79029	4.31889	5.06064	5.37077	3.57387e-07	3.3572e-06
Potri.016G098500	-1.43146	-1.06724	-2.1231	-0.38976	3.46477e-05	0.000304145		Potri.014G191300	-1.05263	-3.77649	-4.02114	-2.03262	3.58026e-07	3.36092e-06
Potri.016G002900	-1.47288	0.691069	-1.65766	-1.35812	3.47309e-05	0.000304779		Potri.013G107300	5.0647	3.32428	1.72385	3.73841	3.6304e-07	3.39995e-06
Potri.011G164700	0.0385652	0.64496	0.435757	-3.27453	3.48303e-05	0.000305506		Potri.001G383100	-4.03825	-8.16161	-3.83825	-2.66883	3.70667e-07	3.46904e-06
Potri.013G108100	-1.92534	-0.877606	0.0237438	-0.311006	3.49787e-05	0.000306663		Potri.011G114600	4.70972	4.62377	5.39855	3.6805	3.74921e-07	3.50178e-06
Potri.018G141500	-3.01352	-0.663285	-0.957551	-1.08707	3.51698e-05	0.000308048		Potri.009G145400	6.38846	3.61935	2.49087	2.43801	3.76753e-07	3.51771e-06
Potri.006G236800	-1.4567	-1.71094	-1.53874	-0.944687	3.53815e-05	0.000309611		Potri.003G092700	2.97831	2.45245	1.26131	1.75093	3.7842e-07	3.52966e-06
Potri.007G082500	-0.990689	-1.9396	0.0102523	-0.22833	3.55956e-05	0.000311386		Potri.002G129300	2.93894	2.52949	3.06394	2.36178	3.792e-07	3.53462e-06
Potri.013G021100	-1.14006	-0.0636098	-2.6876	-1.87137	3.56949e-05	0.000311983		Potri.009G149200	1.72244	1.07366	2.38299	2.52771	3.79416e-07	3.53545e-06
Potri.011G148700	0.660718	-0.472931	-1.28002	0.279731	3.58371e-05	0.000313007		Potri.015G141300	1.6799	-1.67283	-4.75101	-4.75101	3.83452e-07	3.56947e-06
Potri.019G089700	-0.6724	-1.711	0.238215	-0.342815	3.58965e-05	0.000313428		Potri.001G283400	4.89901	3.45945	4.3484	4.37057	3.85086e-07	3.58348e-06
Potri.019G089900	-1.66756	-0.301936	0.801307	0.0866188	3.60264e-05	0.000314464		Potri.T107600	3.21041	2.7924	6.01094	6.37177	3.85257e-07	3.58387e-06
Potri.004G091600	-0.425269	0.573221	-1.52825	-1.39066	3.61022e-05	0.000314829		Potri.017G050200	7.98083	6.30106	6.29377	8.95691	3.9249e-07	3.64384e-06
Potri.019G057500	-1.56083	-0.293354	-0.88523	-4.07859	3.63826e-05	0.000316977		Potri.T153400	6.14274	5.41104	4.45251	2.93816	4.06744e-07	3.76611e-06
Potri.001G339500	-3.79588	0.659989	-6.24376	-1.55503	3.64634e-05	0.000317482		Potri.002G227700	1.68168	2.84876	3.74081	3.07262	4.10406e-07	3.79495e-06
Potri.009G056900	0.788729	-0.535963	-1.05929	0.357307	3.64938e-05	0.000317647		Potri.016G112900	2.54048	1.47278	1.15244	1.08795	4.2758e-07	3.94196e-06
Potri.019G030200	-2.34104	-1.88526	-1.65398	-1.24083	3.71208e-05	0.000322702		Potri.017G085600	-1.69332	-2.63487	-3.10577	-2.3238	4.31507e-07	3.97552e-06
Potri.006G007600	-1.81367	-1.602	-0.176498	-0.0618252	3.75206e-05	0.000325872		Potri.008G006700	-3.23289	-3.23289	2.96485	2.40593	4.31774e-07	3.97667e-06
Potri.004G100400	-4.27722	-2.26159	-1.59587	-0.11781	3.77071e-05	0.000327186		Potri.012G054900	6.68506	6.68011	5.69444	3.8281	4.32354e-07	3.98069e-06
Potri.018G043600	-0.0015114	0.831084	-1.52815	-0.491397	3.78554e-05	0.000328371		Potri.002G149600	2.60729	-1.90326	2.41429	3.42097	4.34978e-07	4.0022e-06
Potri.015G123500	-6.41925	-1.7711	-2.05628	-2.96272	3.80934e-05	0.000330229		Potri.004G181200	3.39857	3.46746	3.29212	2.09592	4.3872e-07	4.02996e-06
Potri.001G460100	0.704664	0.2734	-1.38701	0.328246	3.84622e-05	0.000332913		Potri.017G084800	2.09868	3.76287	2.69494	2.95811	4.40653e-07	4.04504e-06
Potri.010G067000	-1.04823	-1.43726	0.799774	0.169952	3.84626e-05	0.000332913		Potri.015G076400	3.0746	1.97552	1.15544	1.59636	4.49235e-07	4.11295e-06
Potri.008G198100	-2.09717	-1.34921	-0.0893723	-4.53987	3.86352e-05	0.000334303		Potri.011G007800	3.90621	3.68277	3.25174	1.51722	4.53109e-07	4.14706e-06
Potri.T020000	-5.59554	-0.668479	-5.59554	-5.59554	3.86976e-05	0.000334635		Potri.002G173700	2.76369	2.15968	1.51225	2.53316	4.59297e-07	4.19679e-06
Potri.004G094500	0.422576	0.153495	-1.96313	-0.337096	3.88698e-05	0.000335915		Potri.016G099500	-2.99102	-4.00997	-2.77536	-2.15626	4.65515e-07	4.24801e-06
Potri.006G018000	-0.977846	-2.01741	0.150221	-1.28865	3.90744e-05	0.000337419		Potri.005G015800	8.36632	8.49247	8.31146	7.26022	4.66976e-07	4.25995e-06
Potri.012G069400	-0.913723	-1.26714	0.351736	-0.551307	3.90801e-05	0.000337419		Potri.001G268300	-5.84129	-5.84129	-5.84129	-5.84129	4.72059e-07	4.30209e-06
Potri.015G039000	-0.0173915	-0.317144	-0.471755	-6.98879	3.92517e-05	0.000338534		Potri.T095900	7.09247	6.81932	6.49428	4.5209	4.79557e-07	4.36755e-06
Potri.015G046300	-2.13627	-5.98754	-5.98754	-3.42664	3.92579e-05	0.000338534		Potri.T111600	-6.04973	-6.04973	-3.55597	-6.04973	4.90589e-07	4.45488e-06
Potri.013G014400	0.472714	0.813832	-2.15639	0.842537	4.04662e-05	0.000347877		Potri.004G172700	3.09408	1.87063	-3.2349	-3.2349	5.00088e-07	4.53522e-06
Potri.002G190700	-6.23669	-3.07763	-0.58045	-3.63621	4.05475e-05	0.000348361		Potri.011G113600	-1.74124	-3.59943	-4.13153	-3.5558	5.03728e-07	4.56658e-06
Potri.018G021900	-3.80649	-0.0133689	-2.38941	-2.80851	4.06191e-05	0.000348869		Potri.015G054800	4.97948	4.30233	3.17307	4.70197	5.15543e-07	4.66169e-06
Potri.003G124400	-2.54427	-1.58634	-1.5215	-2.65024	4.07781e-05	0.000349695		Potri.013G028900	2.43207	2.84234	2.88606	2.24215	5.20574e-07	4.70107e-06
Potri.001G351900	-1.7805	-1.58167	-0.49673	-0.885662	4.09218e-05	0.000350712		Potri.012G027700	-1.91155	-7.37488	-2.53535	-1.62518	5.23462e-07	4.72561e-06
Potri.015G120200	-0.752001	-2.06564	-1.53911	-0.886959	4.10458e-05	0.000351666		Potri.006G268400	-2.16532	-1.32399	1.57272	2.36523	5.47811e-07	4.93741e-06
Potri.002G107200	0.86081	-1.05138	-0.621076	-0.00793839	4.10998e-05	0.000351912		Potri.019G074400	-2.72923	-2.77789	-2.20098	-2.2183	5.48879e-07	4.94543e-06
Potri.008G064800	0.0426423	0.981558	-1.90918	-0.290776	4.11645e-05	0.00035225		Potri.006G020300	3.90235	3.16437	3.54945	1.842	5.50803e-07	4.95965e-06
Potri.013G114700	-2.14589	-0.728471	-1.33462	-0.735662	4.12942e-05	0.000353087		Potri.001G451300	3.54386	2.54478	2.23547	2.90455	5.50815e-07	4.95965e-06
Potri.014G079500	0.0212433	0.696898	-1.59616	-0.265118	4.22092e-05	0.000359533		Potri.009G169900	4.1565	2.60984	4.02127	4.05548	5.51317e-07	4.96257e-06
Potri.018G063100	-3.00023	-1.18326	-3.23253	-1.8286	4.24839e-05	0.000361652		Potri.005G026700	3.38516	2.80683	2.05562	3.13479	5.54875e-07	4.98974e-06
Potri.010G122200	-1.84299	-1.86121	-1.35242	-1.3751	4.26551e-05	0.000362887		Potri.013G121700	-2.85698	-4.45365	-6.69727	-1.91689	5.61291e-07	5.04581e-06
Potri.015G006100	-3.06732	-0.840029	0.294785	-0.341523	4.30388e-05	0.00036526		Potri.005G195800	-3.66461	-4.59913	-1.41878	-1.68731	5.62539e-07	5.0554e-06
Potri.015G097200	0.0150106	-1.36008	0.576878	0.122709	4.34582e-05	0.000368482		Potri.001G310400	4.50189	3.6132	4.22535	7.26541	5.675e-07	5.09833e-06
Potri.001G032900	-0.8011	0.161386	-1.59263	0.0146844	4.35688e-05	0.000369196		Potri.010G200100	3.24987	1.52159	2.56063	1.97443	5.95608e-07	5.33532e-06
Potri.012G005800	-1.8842	-0.794685	-1.57657	-0.923826	4.38996e-05	0.000371772		Potri.002G065400	2.50792	2.31053	1.94483	2.20062	5.97295e-07	5.34527e-06
Potri.008G018400	-0.28723	-0.0349991	-2.41075	-1.07744	4.41897e-05	0.000373888		Potri.007G097000	2.29222	3.17572	2.31788	3.60504	5.97712e-07	5.34585e-06
Potri.010G163800	-3.0945	-0.777315	-0.341675	-0.40705	4.47996e-05	0.000378704		Potri.008G098900	-2.25048	-3.89136	-2.09654	-1.58491	6.11795e-07	5.46799e-06
Potri.013G101000	-3.99483	-5.00668	-0.060071	-0.229888	4.48981e-05	0.000379191		Potri.002G175300	-4.17286	-4.86676	-3.74143	-1.60151	6.18439e-07	5.5256e-06
Potri.001G216000	-1.43241	-1.73278	0.0764045	-0.690295	4.61834e-05	0.000389171		Potri.006G115200	6.37625	6.8155	3.90667	7.02216	6.26097e-07	5.58684e-06
Potri.005G203300	0.0103589	0.239057	-1.18904	-1.7061	4.62739e-05	0.000389747		Potri.003G019000	-1.19443	-1.95507	-2.639	-1.89225	6.34228e-07	5.65576e-06
Potri.005G074000	-1.41533	0.827477	-1.32741	-1.02506	4.63072e-05	0.00038991		Potri.019G101000	-6.32442	-1.75735	-6.32442	-6.32442	6.36035e-07	5.66823e-06
Potri.009G039500	-2.19492	0.899276	-0.535935	-4.37119	4.64356e-05	0.000390795		Potri.010G188000	5.97069	3.06225	3.6713	3.32985	6.36271e-07	5.66852e-06
Potri.001G318500	-0.590657	-2.05463	-1.75156	0.175675	4.65289e-05	0.000391422		Potri.002G004300	-3.57988	-5.50235	-3.81471	-5.3068	6.3844e-07	5.6848e-06
Potri.005G089700	0.324824	0.64611	-1.81552	-0.119381	4.66257e-05	0.000391999		Potri.008G177600	-3.54713	-1.6242	-4.87602	-2.36876	6.46519e-07	5.74789e-06
Potri.009G024800	-2.67757	0.0582454	-2.87698	-1.03431	4.66729e-05	0.000392278		Potri.012G015600	-2.16938	-1.74004	-1.59438	-2.29254	6.60671e-07	5.86335e-06
Potri.003G198200	-1.24709	0.909408	-0.374854	-0.0114892	4.71069e-05	0.000395536		Potri.004G106100	1.74701	1.23464	3.64327	4.57898	6.66161e-07	5.9083e-06
Potri.001G008400	-1.05976	0.640818	0.737959	0.452944	4.71173e-05	0.000395536		Potri.T029500	2.11312	3.69467	3.37391	1.6909	6.71497e-07	5.95183e-06
Potri.004G080800	-0.476894	0.0822586	-2.20582	-0.249679	4.77321e-05	0.000400094		Potri.005G251600	3.16193	1.81559	3.63104	3.70342	6.82861e-07	6.03907e-06
Potri.001G214500	0.408957	0.826195	-1.19928	-0.327475	4.85469e-05	0.000405825		Potri.007G067600	4.97115	3.80191	4.69396	4.43236	6.89769e-07	6.08855e-06
Potri.015G128400	-1.72951	-0.156211	-1.58118	-11.3536	4.99648e-05	0.000415682		Potri.013G102000	-1.6021	-1.63725	-1.98893	-2.0012	6.92718e-07	6.10875e-06
Potri.003G174100	-2.38692	0.14417	-2.65956	-2.65842	4.99876e-05	0.000415747		Potri.014G054800	2.18786	3.21253	3.09319	2.12894	6.96651e-07	6.13954e-06
Potri.015G143800	0.199478	0.66854	0.0400552	-1.98708	5.04763e-05	0.000419311		Potri.013G141700	-2.36883	-4.49854	-1.96925	-2.91442	6.97921e-07	6.14879e-06
Potri.006G077100	0.477184	0.805075	-1.33292	0.344499	5.09999e-05	0.000422696		Potri.008G168800	-1.07477	-1.2426	-2.36143	-2.6995	7.02683e-07	6.18682e-06
Potri.005G198300	-1.00681	0.0562793	-1.96687	-0.538638	5.10447e-05	0.000422899		Potri.019G048600	-2.27426	-1.41283	-1.47804	-1.14933	7.12281e-07	6.26141e-06
Potri.010G141400	-2.86267	-1.58216	-0.301488	-1.07481	5.12195e-05	0.000424094		Potri.013G059500	-1.47357	-2.26577	-2.05911	-2.19473	7.15281e-07	6.28381e-06
Potri.016G060600	-3.02752	-0.706527	-0.151204	-1.02929	5.16144e-05	0.000426543		Potri.015G024200	3.49814	3.56519	1.4324	2.14181	7.15529e-07	6.28399e-06
Potri.018G113200	0.402685	-0.34176	-1.60854	-0.0380206	5.17337e-05	0.00042721		Potri.009G024000	2.65909	2.61824	2.28071	1.73098	7.31413e-07	6.40326e-06
Potri.016G109600	-1.01426	-0.0831779	-2.12693	-0.525763	5.18747e-05	0.00042812		Potri.002G150100	-3.7593	-3.7593	1.69323	2.64875	7.33741e-07	6.42162e-06
Potri.003G190700	0.95306	0.411744	-1.59909	-0.524741	5.19276e-05	0.00042843		Potri.016G066700	3.74379	2.67939	2.95226	1.6148	7.35258e-07	6.43171e-06
Potri.001G008700	-0.889085	0.897972	-1.05144	-0.0464486	5.19751e-05	0.000428695		Potri.005G081400	-3.46853	-7.27876	-1.74031	-1.51266	7.38709e-07	6.45697e-06
Potri.002G063400	-1.99551	-0.60086	-1.26287	-1.17733	5.22101e-05	0.000430251		Potri.001G226400	-2.03971	-2.918	-3.72055	-1.99186	7.61388e-07	6.64287e-06
Potri.005G141900	-0.835063	0.559885	-2.04951	-1.51787	5.26875e-05	0.0004338		Potri.001G319100	3.66018	1.13954	1.16293	1.05677	7.6245e-07	6.64568e-06
Potri.019G025100	-1.33711	-0.125955	-2.20413	-0.811843	5.37927e-05	0.000441724		Potri.001G254400	-2.72802	-2.76779	-1.59578	-1.0825	7.64752e-07	6.65948e-06
Potri.018G132100	0.198039	0.233175	-1.55225	-3.26498	5.40023e-05	0.000443184		Potri.006G273700	-3.24821	-3.76332	-1.64085	-2.04192	7.65442e-07	6.66339e-06
Potri.012G063800	-0.992918	-1.63106	0.308842	-0.249036	5.43165e-05	0.000445501		Potri.014G058400	-1.68451	-1.97232	-2.22301	-1.83808	7.73559e-07	6.72774e-06
Potri.015G099900	-0.808678	-2.22317	0.62582	-1.19886	5.44565e-05	0.000446321		Potri.002G017500	7.35442	8.47936	7.6256	7.96662	7.83758e-07	6.81218e-06
Potri.004G114400	-3.05731	0.667056	-1.49518	-4.75455	5.44646e-05	0.000446321		Potri.004G076100	6.95729	4.77322	3.8718	4.78568	8.33301e-07	7.19554e-06
Potri.010G063900	0.124008	0.598111	-1.64923	-2.32901	5.45106e-05	0.000446567		Potri.005G242800	-3.81071	-5.15864	-2.6899	-2.03848	8.49584e-07	7.32476e-06
Potri.014G069400	0.087573	0.454133	-1.82268	-0.265318	5.45317e-05	0.000446609		Potri.014G159900	-6.69135	-3.10395	-6.69135	-6.69135	8.6265e-07	7.4236e-06
Potri.002G056800	-0.164671	-1.22947	0.898896	-0.0946028	5.48802e-05	0.000449199		Potri.005G025300	-1.95174	-2.28648	-2.50503	-2.21021	8.65665e-07	7.44493e-06
Potri.006G177000	-1.5507	-0.0422147	-1.39819	-3.63372	5.54128e-05	0.000453025		Potri.017G100500	-2.82724	-4.92571	-2.43185	1.63677	8.76496e-07	7.53342e-06
Potri.011G157300	0.00483733	0.017924	-2.34314	-1.01137	5.58665e-05	0.000456333		Potri.001G079800	2.53833	2.6766	1.92739	2.15146	9.08411e-07	7.79087e-06
Potri.009G037700	0.133026	0.700586	-1.25013	-0.514236	5.61002e-05	0.000457974		Potri.011G155900	6.47957	5.10152	7.65198	5.6246	9.11329e-07	7.81107e-06
Potri.006G226500	-1.19783	-0.249841	0.504745	-2.1644	5.63009e-05	0.000459209		Potri.010G069000	-2.11846	-2.60459	-2.97275	-1.00266	9.18335e-07	7.86384e-06
Potri.018G031100	-1.29984	0.327684	-1.21853	-3.89407	5.65057e-05	0.000460609		Potri.005G257000	1.43297	1.27633	2.05076	3.72104	9.21783e-07	7.88851e-06
Potri.001G414000	-2.61719	-0.0999253	-0.584211	-1.76128	5.66183e-05	0.000461306		Potri.011G095600	5.82138	5.09634	7.15906	7.18647	9.2916e-07	7.94431e-06
Potri.001G157900	-1.45009	-0.0491953	-0.899034	0.280305	5.67311e-05	0.00046197		Potri.008G098200	-2.03685	1.87131	-4.1454	2.48199	9.37845e-07	8.01116e-06
Potri.006G228400	-0.252475	0.21019	0.95555	-1.6294	5.67389e-05	0.00046197		Potri.009G060300	5.07606	6.70419	7.5596	5.97045	9.42433e-07	8.04047e-06
Potri.016G010900	-5.63646	-2.82908	-0.658407	-2.7736	5.67884e-05	0.000462238		Potri.002G128500	4.01823	3.08206	2.29676	1.57122	9.54178e-07	8.12571e-06
Potri.017G058400	-1.46267	-1.1834	0.578348	-0.369335	5.71311e-05	0.000464755		Potri.008G025600	5.54996	5.11672	3.37193	7.56147	9.59776e-07	8.16588e-06
Potri.011G147700	0.846253	-0.19587	-1.03082	0.223366	5.74843e-05	0.000467356		Potri.008G018300	-2.2732	-1.40832	-1.18403	-1.35818	9.74104e-07	8.28018e-06
Potri.001G217600	-0.765352	0.522816	-2.21564	-1.45382	5.76226e-05	0.000468343		Potri.T161800	-1.91347	-1.54276	-2.4525	-3.37195	9.81792e-07	8.33534e-06
Potri.003G207400	-2.75254	-2.29043	-0.853077	-1.73992	5.79919e-05	0.000470248		Potri.008G144500	1.99966	2.09592	2.67845	1.74348	9.83985e-07	8.3514e-06
Potri.006G248000	-0.936815	0.752975	-0.189448	-2.75345	5.8109e-05	0.000470923		Potri.010G163100	1.99986	2.14038	2.02313	4.78799	9.84437e-07	8.35269e-06
Potri.017G075700	-0.882433	0.595251	-1.50177	-1.50301	5.83128e-05	0.000472025		Potri.001G202100	3.41574	3.65493	4.98974	8.72512	9.9228e-07	8.41153e-06
Potri.010G053000	-3.13277	-1.21331	-1.39834	-1.07038	5.83421e-05	0.000472125		Potri.008G212400	4.49579	5.54163	3.63137	3.86747	1.01903e-06	8.61205e-06
Potri.008G183300	-6.92539	-1.78927	-2.52021	-6.92539	5.83932e-05	0.000472402		Potri.015G030700	3.30645	2.57185	2.7167	2.02489	1.03523e-06	8.73835e-06
Potri.014G138300	-7.30726	-1.76247	-1.03598	-0.799084	5.84273e-05	0.000472403		Potri.004G235000	2.45268	2.07732	3.86066	1.78738	1.05148e-06	8.85935e-06
Potri.005G254200	-0.804405	-1.60192	-1.19672	-0.117905	5.84788e-05	0.000472683		Potri.004G051800	6.06312	6.82295	3.90183	4.7781	1.05699e-06	8.90302e-06
Potri.008G135400	-2.29534	-0.379907	-0.422889	-0.799477	5.85708e-05	0.000473289		Potri.014G075400	-6.15285	-6.15285	-6.15285	-2.3232	1.08591e-06	9.12455e-06
Potri.013G008900	0.408374	0.314909	-1.56263	-0.38127	5.86774e-05	0.000474013		Potri.003G124400	-2.29446	-1.56826	-1.95233	-2.78058	1.09177e-06	9.16824e-06
Potri.006G008700	-2.91042	-0.975316	-4.04263	-3.12047	5.88304e-05	0.000474958		Potri.016G079700	1.45074	1.0759	2.86807	3.51815	1.09768e-06	9.21508e-06
Potri.004G063600	-2.05321	-0.649846	-1.85795	-1.11143	5.88605e-05	0.000474958		Potri.010G166600	-1.75409	-5.43554	-3.42383	-1.21373	1.09944e-06	9.22427e-06
Potri.001G156600	-2.07951	-0.860051	-0.6601	-0.340869	5.89233e-05	0.000475111		Potri.008G027600	-3.1539	-1.40695	-4.11749	-3.0053	1.10083e-06	9.23294e-06
Potri.009G100900	-1.47454	0.212924	-1.2006	-0.509498	5.90585e-05	0.00047585		Potri.002G128900	6.53941	5.37486	6.09603	8.15692	1.10114e-06	9.23294e-06
Potri.002G185800	-2.35483	-0.368785	-2.72433	-1.73052	5.98664e-05	0.000481663		Potri.008G012800	-8.52428	-3.15652	-1.27146	1.19316	1.11974e-06	9.38613e-06
Potri.001G424700	-1.30517	-1.53746	0.741867	0.026105	5.99349e-05	0.000482074		Potri.006G027800	-1.6622	-3.76113	1.76996	2.79768	1.13507e-06	9.49744e-06
Potri.016G006300	-1.4924	0.930915	-3.48783	-0.409308	6.00513e-05	0.000482871		Potri.012G055200	-2.61521	-3.32832	-3.39354	-1.39137	1.13916e-06	9.52587e-06
Potri.T127800	-2.51909	-1.78867	-0.535138	-0.885667	6.01748e-05	0.000483725		Potri.001G324500	3.62803	2.50827	2.22669	1.4184	1.14574e-06	9.57229e-06
Potri.011G100000	-1.57946	-2.87877	-1.39428	-0.593863	6.02193e-05	0.000483943		Potri.014G189400	5.11099	3.71699	2.48378	4.5777	1.1668e-06	9.72484e-06
Potri.017G057800	-2.1286	-2.3845	-0.103471	-1.33484	6.07148e-05	0.000487376		Potri.009G129500	-2.06206	-1.54525	-1.79495	-2.01458	1.18326e-06	9.84725e-06
Potri.011G065900	-6.05972	-2.23299	-1.39084	-6.05972	6.07943e-05	0.000487719		Potri.001G229500	7.01636	5.51408	4.61126	4.21543	1.1868e-06	9.8738e-06
Potri.015G026600	-0.273578	-0.148464	-1.75942	-2.32529	6.08454e-05	0.000487989		Potri.010G106900	2.31558	-4.18984	1.01171	-4.18984	1.20025e-06	9.97143e-06
Potri.009G140900	-0.751339	-1.28022	-1.74345	-3.25609	6.14775e-05	0.00049235		Potri.T149100	-1.68817	-4.17494	-4.76136	-1.90449	1.20033e-06	9.97143e-06
Potri.013G147500	-1.90526	0.88342	-0.660658	-1.85665	6.18916e-05	0.000495097		Potri.001G055100	-1.49288	1.55669	-2.64937	-1.74767	1.23356e-06	1.02291e-05
Potri.018G020800	-1.63138	-1.22499	-1.782	-1.23666	6.21872e-05	0.000497177		Potri.010G125900	8.07172	7.64727	7.00737	5.62085	1.23633e-06	1.02429e-05
Potri.013G115800	-1.60017	-1.41368	-2.00485	-0.218861	6.2589e-05	0.000499958		Potri.012G102200	-3.57878	-1.65032	-2.00348	-1.7545	1.24105e-06	1.0279e-05
Potri.001G079900	-0.649987	-0.492089	-1.97938	0.261	6.26605e-05	0.000500386		Potri.016G020000	1.82098	1.18125	3.49769	1.69297	1.24267e-06	1.02893e-05
Potri.018G152300	-0.389041	-0.234272	-2.32215	-1.96778	6.28e-05	0.000501356		Potri.006G226900	5.31633	5.31803	2.52268	4.32765	1.25352e-06	1.03699e-05
Potri.005G070300	-2.93596	-1.82617	-1.16502	-2.82787	6.29383e-05	0.000502056		Potri.001G082500	5.19503	3.3497	3.29714	3.6806	1.27703e-06	1.05518e-05
Potri.014G097000	-2.19911	-0.856967	-0.558845	-0.581675	6.2989e-05	0.000502145		Potri.010G171000	2.47937	2.85741	2.10841	3.83088	1.29603e-06	1.06834e-05
Potri.006G142500	-1.54986	-0.119507	-2.26929	-0.0856445	6.33916e-05	0.000505066		Potri.004G037900	1.68416	1.0041	3.95452	2.82356	1.31495e-06	1.08233e-05
Potri.001G017000	-3.23929	-1.42672	-0.770094	-0.369656	6.38096e-05	0.000507816		Potri.019G124100	4.55922	3.52444	2.9059	4.34393	1.31932e-06	1.0856e-05
Potri.009G118800	-0.925829	-1.5012	0.0783128	0.696577	6.38368e-05	0.000507887		Potri.005G217900	-3.8504	-5.94914	-5.94914	-5.94914	1.32786e-06	1.09134e-05
Potri.011G103900	-1.0205	-1.27429	-1.81554	-0.754126	6.40458e-05	0.000508969		Potri.005G229700	-1.18185	-1.26809	-2.43621	-2.13322	1.3287e-06	1.09171e-05
Potri.002G167700	-1.02728	-1.20982	0.831687	0.0283136	6.41332e-05	0.000509518		Potri.001G171600	1.78463	1.6319	2.63845	3.57872	1.35202e-06	1.10989e-05
Potri.011G164800	-0.0195166	0.0819464	0.205904	-3.49232	6.44936e-05	0.000512089		Potri.015G040900	-2.21042	-2.72403	1.12597	3.06641	1.36644e-06	1.11941e-05
Potri.013G016900	-1.5071	-0.473114	-1.13981	0.231321	6.46754e-05	0.000513387		Potri.002G127400	2.69384	2.97667	1.89741	2.13683	1.36972e-06	1.12148e-05
Potri.001G201400	-0.517676	0.369498	-1.99102	-0.461531	6.53141e-05	0.000518309		Potri.004G101400	4.12561	6.50251	6.96945	6.31814	1.37018e-06	1.12148e-05
Potri.T023500	-7.62483	-1.38268	-0.709477	-1.70425	6.65342e-05	0.00052739		Potri.001G462700	4.14369	6.97337	5.05046	5.17998	1.3906e-06	1.13686e-05
Potri.001G354300	-4.06791	-1.08288	-6.53967	-3.98222	6.68504e-05	0.000529445		Potri.017G139500	-1.01327	-1.14045	-2.19381	1.58172	1.40994e-06	1.15064e-05
Potri.T053500	-2.38417	-0.44493	0.645308	-0.436091	6.73408e-05	0.000533025		Potri.006G153400	-2.91705	-6.37515	-2.46745	-6.37515	1.43828e-06	1.17101e-05
Potri.008G179100	-1.39557	-1.04244	0.197438	0.0827807	6.7896e-05	0.000537268		Potri.013G055600	-2.10658	-1.96606	-1.8767	-1.342	1.44068e-06	1.17263e-05
Potri.016G038000	-1.9971	-2.68161	-0.876202	-0.464927	6.81913e-05	0.000539145		Potri.014G161200	4.07495	1.53817	4.03317	2.52113	1.44146e-06	1.17292e-05
Potri.003G088100	-2.08847	-1.55219	-1.19284	-0.870919	6.82794e-05	0.000539688		Potri.002G109900	-1.85423	-6.24113	-6.24113	-6.24113	1.50523e-06	1.21662e-05
Potri.006G066500	-2.8126	-0.689784	-3.58779	-6.14595	6.84416e-05	0.000540817		Potri.T114000	3.32721	4.13982	3.47884	2.30864	1.5155e-06	1.22349e-05
Potri.005G138400	-0.481966	-1.73924	-0.00313701	-0.239013	6.84708e-05	0.000540894		Potri.008G120000	-3.53842	-4.46456	-4.18979	-1.10928	1.51744e-06	1.22471e-05
Potri.T024600	-0.746645	-1.65306	0.505696	0.103474	6.87274e-05	0.000542767		Potri.T053500	-2.11918	-1.49662	-1.40902	-1.16778	1.54999e-06	1.24925e-05
Potri.010G005600	0.368701	-0.0162811	-2.04153	0.216529	6.9036e-05	0.000544895		Potri.004G235500	7.5259	5.52651	7.73732	8.99167	1.55261e-06	1.25012e-05
Potri.014G178000	-1.41572	-1.24705	0.00651448	0.148784	7.01505e-05	0.000552753		Potri.016G092500	3.87904	3.58938	2.32012	3.95902	1.55643e-06	1.25254e-05
Potri.006G237100	-1.90773	-1.48225	0.925644	0.310289	7.03856e-05	0.00055425		Potri.002G091600	4.4039	3.74254	3.02699	3.80303	1.57019e-06	1.26324e-05
Potri.016G128100	-1.10913	0.629532	-0.516747	-1.77306	7.04683e-05	0.000554629		Potri.014G193800	4.10635	3.10619	1.74593	2.2536	1.57319e-06	1.26529e-05
Potri.015G039300	-0.722719	0.80355	-1.74966	-1.7099	7.05678e-05	0.000555099		Potri.008G137700	1.82915	3.18363	2.74116	2.39443	1.61676e-06	1.29696e-05
Potri.015G116300	-5.72181	0.120953	-3.17715	-2.24225	7.06029e-05	0.000555218		Potri.017G064000	-5.81401	-5.81401	-5.81401	-1.28238	1.62919e-06	1.30611e-05
Potri.010G206100	-0.911518	0.885053	-0.340009	-4.79417	7.07892e-05	0.000556369		Potri.001G406400	-3.92663	-6.03437	-3.55518	-6.03437	1.64507e-06	1.317e-05
Potri.003G193600	0.113271	0.0746575	-1.98205	-0.377921	7.09457e-05	0.000557442		Potri.013G149300	-1.77861	-2.35941	-7.12594	-1.37024	1.67728e-06	1.34125e-05
Potri.006G007900	-2.54597	0.233066	-1.78765	-0.464978	7.13585e-05	0.00056037		Potri.018G002400	4.95995	4.03018	7.68296	6.46431	1.70233e-06	1.35932e-05
Potri.T059000	-0.361063	0.129888	-2.14942	-0.816749	7.16683e-05	0.000562326		Potri.001G448300	4.77647	2.25951	5.70943	7.42022	1.7123e-06	1.36611e-05
Potri.003G099800	-1.32472	0.734509	-0.637273	-1.80629	7.24453e-05	0.000567944		Potri.007G091000	1.99984	1.9108	3.2653	4.4226	1.79236e-06	1.42304e-05
Potri.012G045200	0.335273	0.523518	-1.77561	-0.123823	7.25195e-05	0.000568205		Potri.001G466200	4.24829	1.96781	3.16664	3.01456	1.8368e-06	1.45624e-05
Potri.001G312200	0.85158	-2.09207	-0.027708	-0.0513598	7.29807e-05	0.000571497		Potri.014G170400	-1.56622	-1.49313	-2.29176	-1.85057	1.85759e-06	1.46958e-05
Potri.007G007500	-1.2579	-2.25259	-1.31527	-1.3556	7.34259e-05	0.000574338		Potri.T141900	3.13944	3.42176	4.04185	4.2005	1.85786e-06	1.46958e-05
Potri.009G038300	-2.35707	-0.425599	-0.179392	0.106072	7.36363e-05	0.000575499		Potri.005G203200	4.22434	2.67084	2.1229	2.81012	1.9047e-06	1.50621e-05
Potri.013G154200	0.457852	-0.579174	-2.15443	-0.833561	7.42229e-05	0.000579109		Potri.002G105300	3.93072	3.76728	3.41027	2.96046	1.9232e-06	1.51868e-05
Potri.001G272400	0.107598	-0.0998734	-1.84013	-1.09852	7.4271e-05	0.00057916		Potri.017G122300	-2.42589	-1.73034	1.00484	1.14018	1.926e-06	1.52045e-05
Potri.001G201500	-0.157394	-1.69645	0.0343446	0.337129	7.51437e-05	0.00058482		Potri.014G009700	6.87347	5.61381	7.04606	7.15462	1.92903e-06	1.52198e-05
Potri.004G057000	0.28226	0.265494	-1.53722	0.233984	7.55877e-05	0.000587619		Potri.010G119500	2.45383	1.89977	1.62114	1.49634	1.9324e-06	1.5242e-05
Potri.015G042200	-4.34173	-1.67372	0.315834	-8.18788	7.57903e-05	0.00058891		Potri.006G121700	-1.24899	-1.97747	1.43391	2.41936	1.93684e-06	1.52597e-05
Potri.014G082100	-2.21139	-0.317198	-1.68467	-0.500821	7.62039e-05	0.000591584		Potri.006G138700	3.89064	3.85612	2.59468	4.82598	1.94725e-06	1.53331e-05
Potri.005G033500	-6.00399	-1.78074	-1.9667	-0.667043	7.78095e-05	0.00060237		Potri.002G025500	3.17794	2.57673	5.06647	6.18082	1.95572e-06	1.53911e-05
Potri.004G092400	-1.62342	-1.60632	-1.54271	-0.618019	7.7867e-05	0.000602648		Potri.003G078100	4.04535	2.96443	2.41496	3.76793	1.97406e-06	1.55178e-05
Potri.010G189900	-1.55649	-1.37614	-1.69082	-1.02159	7.85499e-05	0.000606921		Potri.017G147000	2.49355	2.49743	2.4927	3.66844	1.98713e-06	1.56073e-05
Potri.015G038200	-0.847085	-0.190451	-3.15456	-0.876134	7.88641e-05	0.000608995		Potri.005G036600	-2.85301	-2.79274	1.59925	2.90909	2.05021e-06	1.60529e-05
Potri.007G146800	0.700536	0.910968	-1.84921	-0.652554	7.90637e-05	0.000610214		Potri.008G143800	-6.74317	-4.48474	-4.24481	-2.91398	2.07538e-06	1.62317e-05
Potri.001G110300	0.353549	0.662198	-0.92224	-2.34952	7.93407e-05	0.000612013		Potri.005G230100	-3.59873	-1.62236	-1.17884	-1.85243	2.1496e-06	1.67655e-05
Potri.009G167400	-1.9581	0.887368	0.213508	-1.40722	7.96944e-05	0.000614571		Potri.017G022100	8.57958	6.31245	7.0507	7.2235	2.15113e-06	1.67722e-05
Potri.014G146100	-0.017536	0.22802	-1.51732	-3.73598	8.0122e-05	0.000617527		Potri.010G211300	-1.37249	-2.06273	-2.89162	-2.16755	2.16676e-06	1.68798e-05
Potri.012G104900	-1.08422	-0.43269	0.21549	-1.71161	8.03323e-05	0.000618805		Potri.008G053400	-4.56103	-6.65975	-2.06743	-1.66885	2.17021e-06	1.6902e-05
Potri.007G093200	-1.02411	-0.475481	-2.45016	-2.09922	8.03559e-05	0.000618816		Potri.001G209300	-2.37214	1.27745	2.26928	5.32389	2.1853e-06	1.70148e-05
Potri.008G084100	-2.09656	-1.46516	-2.09101	-7.62288	8.058e-05	0.000620199		Potri.015G052900	-2.5376	-3.29287	-6.38115	-6.38115	2.20471e-06	1.71515e-05
Potri.011G027000	-3.14438	-1.09501	-3.89214	-1.19409	8.06887e-05	0.000620864		Potri.004G012700	5.43664	4.20747	4.11903	2.71491	2.21865e-06	1.72454e-05
Potri.003G192600	0.0558706	-2.75252	0.311727	-7.06372	8.08218e-05	0.000621545		Potri.004G215000	-3.06347	-4.26222	-6.50559	-1.31603	2.22939e-06	1.73192e-05
Potri.005G218200	-0.226248	-1.77258	0.161631	-1.41448	8.10681e-05	0.000623095		Potri.002G252400	-1.69559	-1.04159	1.14975	5.41626	2.25275e-06	1.7486e-05
Potri.001G314500	0.949575	-0.149129	-1.07951	0.546405	8.22279e-05	0.000631661		Potri.T032800	-6.61757	-2.99853	-2.03572	-1.62339	2.28819e-06	1.77166e-05
Potri.007G042900	-1.99315	-0.161789	-0.0499124	0.747813	8.26469e-05	0.000634529		Potri.010G167300	-1.73817	-2.40938	-3.41621	-2.075	2.28895e-06	1.77175e-05
Potri.011G036500	-2.82212	-1.83886	-0.31014	-0.787274	8.27454e-05	0.000634936		Potri.001G235800	3.19191	3.53536	3.35738	2.8693	2.29609e-06	1.77679e-05
Potri.002G009600	-0.829772	-1.32185	0.319715	0.485028	8.27799e-05	0.000634955		Potri.012G109700	-3.79991	-3.79991	-3.79991	2.28542	2.30076e-06	1.77934e-05
Potri.002G073000	-1.80948	-1.50687	-0.792191	-0.697284	8.33151e-05	0.000638428		Potri.004G054900	2.42907	2.61579	3.62169	6.1767	2.30688e-06	1.78315e-05
Potri.013G047000	-2.16713	-0.54226	-0.854587	-1.25556	8.34445e-05	0.000639244		Potri.015G117000	3.72652	3.03139	2.18213	1.25623	2.33911e-06	1.80606e-05
Potri.012G104300	-2.58011	-1.25581	-1.47969	-0.263351	8.48772e-05	0.000648436		Potri.014G096600	-3.18689	-1.92555	-1.88421	-1.89503	2.40062e-06	1.85046e-05
Potri.005G088900	-1.08345	-1.32741	-4.05229	-4.03697	8.62483e-05	0.000657345		Potri.019G103300	-3.47846	-3.29457	-3.44144	-1.56498	2.42764e-06	1.87077e-05
Potri.001G275300	-1.9335	-1.47755	-0.45171	-0.646437	8.69886e-05	0.000662026		Potri.T134600	-1.84527	-3.69801	-3.68945	-2.28344	2.42975e-06	1.87188e-05
Potri.005G033600	-6.81171	-0.0844572	-1.13438	-1.90246	8.707e-05	0.000662283		Potri.010G022700	-1.46782	-2.19898	-2.79459	-1.80155	2.48827e-06	1.91166e-05
Potri.013G026700	0.296424	0.363199	-1.83906	-0.614693	8.71025e-05	0.00066235		Potri.001G107600	4.82286	1.68505	1.93713	2.25244	2.49533e-06	1.91655e-05
Potri.017G154700	-5.2027	-5.2027	-0.569258	-5.2027	8.71639e-05	0.000662636		Potri.017G118100	7.40952	7.83146	6.2857	5.87367	2.50031e-06	1.91932e-05
Potri.018G046500	-1.98131	-2.24589	-0.297034	-0.468181	8.86528e-05	0.000672864		Potri.008G175000	2.09002	2.13647	3.19225	2.17411	2.51485e-06	1.92995e-05
Potri.004G149100	0.164651	0.304785	-1.74613	-0.184846	8.86907e-05	0.000672958		Potri.005G024800	3.21976	1.4302	3.11944	1.71336	2.51792e-06	1.93178e-05
Potri.005G206000	-1.52621	-0.831036	0.60403	0.0760165	8.90954e-05	0.000675049		Potri.010G137300	-1.24834	1.51273	-1.60472	-3.14327	2.52262e-06	1.93378e-05
Potri.014G039800	-0.96504	-1.82263	0.4886	-0.26088	8.91117e-05	0.000675049		Potri.003G189400	-2.36224	-1.84535	-1.73771	-1.77265	2.53507e-06	1.94172e-05
Potri.017G134800	-1.01741	-0.708765	0.748258	0.695265	8.9263e-05	0.000676011		Potri.010G129800	1.50475	2.21625	-1.44189	-1.48981	2.53545e-06	1.94172e-05
Potri.001G121400	-2.66598	-1.20586	-3.09149	-0.8562	9.00538e-05	0.000681445		Potri.007G026500	-2.47063	-1.26312	-1.08115	-1.17178	2.53716e-06	1.9418e-05
Potri.002G062400	0.164149	0.348112	-1.51183	-0.387405	9.06553e-05	0.000685438		Potri.003G181600	3.45068	3.93498	3.77226	1.86824	2.55951e-06	1.9572e-05
Potri.002G021300	-0.346838	0.161555	-2.0412	-1.24377	9.08551e-05	0.000686576		Potri.015G045500	6.38573	4.75224	6.515	3.29342	2.6106e-06	1.99025e-05
Potri.017G036500	-6.58625	0.0808735	-1.65696	-1.44468	9.10375e-05	0.000687767		Potri.003G077300	-2.63264	-1.12016	-1.56735	-1.49785	2.61573e-06	1.99306e-05
Potri.001G002200	-1.76492	0.598303	-0.555266	-0.740432	9.1967e-05	0.000693754		Potri.019G033200	-2.13352	-2.23361	-1.24465	-1.09732	2.62501e-06	1.99958e-05
Potri.004G021000	0.0139406	0.138163	-0.859785	-2.81665	9.22413e-05	0.000695353		Potri.014G134000	-4.2461	-8.34369	-1.0042	-2.10361	2.63276e-06	2.00494e-05
Potri.013G019300	0.586528	-0.359935	-1.54262	-0.82867	9.29076e-05	0.000699619		Potri.005G026300	-4.73106	-2.85043	-1.20206	1.30939	2.63437e-06	2.00561e-05
Potri.013G097800	-1.50258	-3.04393	-0.776211	0.268398	9.30256e-05	0.000700261		Potri.015G069600	3.10191	3.09508	3.21875	1.87937	2.65591e-06	2.02035e-05
Potri.008G092700	-3.41204	-0.496152	0.618002	-0.721763	9.30431e-05	0.000700261		Potri.001G242600	-5.15462	-1.87211	-2.47725	-1.31028	2.66227e-06	2.02451e-05
Potri.009G147500	-2.96468	-1.41319	-0.562172	-5.76927	9.31711e-05	0.000701035		Potri.001G122300	-1.91232	-6.50036	-2.5973	-4.06545	2.66741e-06	2.02688e-05
Potri.014G159300	-0.743225	-1.49685	0.52034	-0.276201	9.34303e-05	0.000702606		Potri.001G462400	-2.09264	-2.85764	-6.85862	-2.33458	2.70469e-06	2.05131e-05
Potri.005G227300	0.183552	-0.863309	-1.47066	-0.354077	9.39314e-05	0.000706183		Potri.008G151800	-3.6856	-3.84321	-1.08236	1.70737	2.74778e-06	2.08056e-05
Potri.005G058400	-0.930466	-0.854524	-2.08152	-0.901813	9.40592e-05	0.000706954		Potri.001G060900	6.26375	3.98576	2.49123	2.43486	2.75594e-06	2.08503e-05
Potri.019G101000	-3.77354	-3.07124	-6.24153	-1.07834	9.48984e-05	0.000712492		Potri.007G038300	-1.04544	-1.25096	-1.76709	2.10667	2.75707e-06	2.08514e-05
Potri.012G131400	-1.14175	0.637099	-0.408913	-2.67116	9.50668e-05	0.000713372		Potri.005G006200	7.24053	7.97546	5.37729	4.77136	2.75758e-06	2.08514e-05
Potri.016G135000	-5.06961	-5.06961	0.22305	-2.47555	9.51085e-05	0.000713493		Potri.018G142100	-1.71206	-1.11419	-2.16835	-1.8083	2.77396e-06	2.09638e-05
Potri.019G063700	-1.07216	-1.2924	-1.19051	0.530862	9.53113e-05	0.00071463		Potri.007G109500	3.45257	2.25897	6.68393	6.55093	2.89953e-06	2.18179e-05
Potri.012G035200	-0.700615	-2.50626	-1.48307	-1.31046	9.55292e-05	0.000716071		Potri.T149300	6.58243	5.2616	7.28808	4.77716	2.93345e-06	2.20254e-05
Potri.007G110400	-3.33705	-0.16168	-2.71127	-1.94166	9.57022e-05	0.000717175		Potri.004G014100	-2.01587	-1.55492	-1.14657	-1.17327	2.99947e-06	2.24786e-05
Potri.005G068500	-2.30636	-0.315041	-1.83327	-3.29516	9.66749e-05	0.000723685		Potri.010G133100	-2.51486	-5.44021	-1.53502	1.10128	3.01228e-06	2.25564e-05
Potri.014G177200	-1.75687	-0.84243	-0.794262	-7.1049	9.68371e-05	0.00072451		Potri.019G005600	-1.12655	1.90247	-3.23415	3.17692	3.05432e-06	2.28343e-05
Potri.009G084800	-1.36841	-0.998264	0.774611	-0.191492	9.70591e-05	0.000725976		Potri.016G002600	2.90818	5.54405	7.75197	6.88998	3.05935e-06	2.28658e-05
Potri.T053300	-3.43125	-2.20691	-1.08976	0.104884	9.8539e-05	0.000736255		Potri.007G134000	2.4075	1.94756	1.53485	3.49827	3.10193e-06	2.31591e-05
Potri.007G100600	-1.60504	-0.547361	0.217562	0.00648574	9.87064e-05	0.00073711		Potri.004G092400	-1.85109	-2.35554	-1.34719	-1.58635	3.13639e-06	2.33954e-05
Potri.010G245600	-2.47297	-1.4471	-0.895765	-3.25349	9.87476e-05	0.00073722		Potri.008G072400	-2.60267	-1.84858	-1.09928	-1.02244	3.13696e-06	2.33954e-05
Potri.001G030200	0.613181	0.0802851	-1.40907	0.342831	9.92623e-05	0.000740468		Potri.004G211100	3.65085	2.74086	2.03149	2.53329	3.15235e-06	2.34977e-05
Potri.008G102500	-1.47776	-0.0522106	-1.64328	-1.01071	0.000100287	0.000747508		Potri.019G100300	1.34456	2.51385	1.07568	-1.54128	3.17172e-06	2.3623e-05
Potri.003G115700	-0.969443	-0.853404	-1.1812	-1.94052	0.000100435	0.000748232		Potri.006G104400	3.1191	3.17108	1.11104	2.18805	3.19782e-06	2.37983e-05
Potri.006G142600	0.228491	0.0292239	-2.94076	-3.75272	0.000100437	0.000748232		Potri.013G076100	-1.70063	-1.22433	-2.34976	-1.26712	3.20814e-06	2.38687e-05
Potri.005G231300	-0.956162	-1.22626	0.773644	-0.248304	0.000100687	0.000749688		Potri.006G066500	-6.22434	-3.96989	-3.73111	-3.79	3.26823e-06	2.42876e-05
Potri.002G173400	-1.19061	0.381724	0.086594	-2.48451	0.00010102	0.000751578		Potri.010G138500	-4.13708	-1.89787	-4.13708	2.2874	3.26882e-06	2.42876e-05
Potri.007G057200	-1.62631	-1.18488	-0.431083	-0.85867	0.000101021	0.000751578		Potri.019G035500	2.37297	1.28736	2.29579	3.3046	3.2769e-06	2.43412e-05
Potri.006G192000	-0.0731589	-0.672717	-1.89388	-0.350955	0.000101369	0.000753365		Potri.003G082100	-2.65846	-1.25985	-1.11586	-2.15256	3.35383e-06	2.48728e-05
Potri.017G131600	-1.84052	0.0700847	-2.27565	-1.52294	0.000101724	0.000755595		Potri.T175200	4.71722	5.4357	5.26473	3.64033	3.37867e-06	2.50503e-05
Potri.001G329600	-1.32886	-0.759909	0.703326	-0.499321	0.000102221	0.000758682		Potri.018G141500	-2.10132	-1.66038	-3.42709	-3.09324	3.40625e-06	2.52413e-05
Potri.002G124500	-1.25084	-0.895471	-2.69744	-5.27131	0.000102292	0.000759002		Potri.018G055900	4.00791	2.18381	5.32826	4.23968	3.40728e-06	2.52422e-05
Potri.005G238800	-1.17066	-0.829701	0.498725	-0.257198	0.000103059	0.000764087		Potri.015G020000	6.55732	5.25628	2.49179	4.21551	3.42366e-06	2.53501e-05
Potri.001G005700	-3.55262	-1.51813	0.664162	0.85621	0.000103764	0.000768491		Potri.003G188200	-2.38046	1.25458	2.22695	4.31352	3.49648e-06	2.5841e-05
Potri.001G467300	-0.986879	-0.227333	-1.15145	-6.58416	0.000103915	0.000768995		Potri.019G007200	-1.37361	-3.11371	-1.72007	-1.18231	3.55357e-06	2.62281e-05
Potri.009G065800	0.463254	-0.417135	-1.42539	-0.0843682	0.000104003	0.000769445		Potri.010G048300	-1.2851	-1.23528	-1.94442	-2.6881	3.6076e-06	2.65845e-05
Potri.015G086200	-1.78175	0.567455	-0.642163	-0.794334	0.000104438	0.000772255		Potri.010G249300	2.68873	1.87476	1.54775	2.04609	3.65466e-06	2.68957e-05
Potri.004G212800	-2.10331	-4.12016	-5.98978	-5.98978	0.00010461	0.000773323		Potri.017G091000	-1.9899	-3.27709	-1.71729	-1.03644	3.67834e-06	2.70556e-05
Potri.015G077600	-1.87795	-0.0233118	-0.232787	-0.969464	0.000106059	0.000783197		Potri.008G155900	-6.16883	-2.16712	-1.06379	1.32159	3.70982e-06	2.72728e-05
Potri.008G058800	-0.365785	0.419232	-1.10711	-1.22239	0.000106155	0.000783678		Potri.018G149300	4.54655	4.10516	4.20725	3.04708	3.71345e-06	2.72922e-05
Potri.009G135100	0.167932	0.605582	-1.28779	-0.635906	0.00010618	0.000783678		Potri.002G121300	4.07464	4.62791	4.10685	3.11349	3.80462e-06	2.78958e-05
Potri.010G014300	-1.73615	-1.05607	-0.154908	-0.166165	0.000106436	0.000785116		Potri.004G093700	-1.47824	-2.53328	-3.91445	-1.40202	3.82964e-06	2.80719e-05
Potri.006G002500	-1.49193	0.464226	-2.3434	-8.14967	0.000106459	0.000785116		Potri.005G163000	2.39978	2.30189	2.89282	4.74864	3.83673e-06	2.81164e-05
Potri.001G064600	-2.58383	-1.44007	-2.2624	-1.20635	0.000107168	0.000789092		Potri.004G088400	3.5363	4.24011	4.31103	6.68148	3.85756e-06	2.82542e-05
Potri.013G007800	-0.958051	-1.39659	0.269855	-0.21113	0.000107327	0.000789817		Potri.001G221200	-4.1457	-4.1457	1.10627	2.02623	3.86088e-06	2.82702e-05
Potri.002G146300	-1.20408	-1.50593	-0.00472066	-0.00378209	0.000107372	0.000789817		Potri.001G307800	-3.08994	-1.38752	-2.3528	-2.37349	3.86306e-06	2.82721e-05
Potri.014G024000	0.0595182	0.286157	-0.165577	-3.88114	0.000108481	0.000797491		Potri.004G014700	3.29652	-1.05329	3.33265	1.82633	3.8693e-06	2.83104e-05
Potri.006G153400	-3.83318	-1.49516	-3.75316	-3.72777	0.000110141	0.000807777		Potri.002G106800	2.13768	2.2403	2.82208	1.25246	3.87364e-06	2.83347e-05
Potri.015G013700	0.355428	0.73395	-0.213334	-3.30004	0.000110192	0.000807937		Potri.008G110000	-7.74879	-3.19857	-3.58392	-2.66159	3.90123e-06	2.8514e-05
Potri.006G236700	-1.67359	-1.15272	-1.71975	-0.777358	0.000110709	0.0008113		Potri.004G228500	-1.38012	-1.30656	-1.7089	-1.77561	3.92111e-06	2.86366e-05
Potri.005G039000	0.172395	0.596592	-1.82178	-0.519821	0.000110833	0.000811998		Potri.002G122000	2.24749	2.36623	1.10685	2.03534	3.93833e-06	2.87398e-05
Potri.009G047500	-0.0434634	0.084707	-1.88755	-0.617886	0.000111471	0.000816457		Potri.001G198100	3.82832	2.34681	2.06051	3.54606	4.02553e-06	2.93222e-05
Potri.004G147600	-1.43937	-1.09974	-1.53995	-0.469882	0.000111545	0.000816773		Potri.002G166400	3.44641	2.49375	2.61841	1.76201	4.1063e-06	2.9848e-05
Potri.011G098000	0.0339932	-0.254896	-1.88645	-0.315089	0.000112537	0.000822966		Potri.008G024000	3.44969	5.39973	3.9069	6.75082	4.12753e-06	2.9971e-05
Potri.T155700	-2.65635	-0.418452	0.150362	-0.0263419	0.000112628	0.000822987		Potri.011G039100	4.19478	1.4654	2.80787	1.00315	4.17361e-06	3.0266e-05
Potri.002G112500	-1.66278	-1.2208	-1.13049	-0.669627	0.00011276	0.000823517		Potri.016G138300	4.38858	3.98709	2.49925	7.1274	4.23942e-06	3.07032e-05
Potri.011G164100	-2.14729	-1.14762	-1.37549	-0.937421	0.000113676	0.00082934		Potri.008G168700	1.1325	2.9999	4.54399	3.08576	4.24306e-06	3.07143e-05
Potri.014G125600	-0.482661	-1.95389	-0.515641	-0.547555	0.000113828	0.000829759		Potri.010G060200	4.11018	1.75254	1.60676	2.55583	4.24317e-06	3.07143e-05
Potri.001G141200	-2.12938	-1.24573	-1.07583	-0.859457	0.000113853	0.000829759		Potri.002G003800	3.91731	3.35928	3.60978	3.86024	4.29377e-06	3.10483e-05
Potri.015G110400	0.125438	0.161071	-1.37074	-1.08843	0.000114295	0.000832544		Potri.002G204700	2.63261	1.87669	3.26386	3.99932	4.33956e-06	3.13386e-05
Potri.005G038000	-1.7198	0.0790378	-1.42451	-1.42007	0.000115113	0.00083713		Potri.007G003500	-1.89911	-1.21746	-1.60401	-1.61384	4.38002e-06	3.1598e-05
Potri.002G014200	0.562748	0.891034	-0.917781	-1.23806	0.000115194	0.00083713		Potri.006G099100	7.23239	5.7379	5.73884	4.52615	4.41867e-06	3.1819e-05
Potri.017G144500	-0.360829	0.16749	-2.09816	-0.807246	0.00011533	0.000837891		Potri.006G281000	-2.74222	-3.3322	-7.321	-2.32748	4.44481e-06	3.19907e-05
Potri.002G238900	0.797551	0.310601	-0.458808	-1.20603	0.000116347	0.000844184		Potri.014G102200	-1.51248	-1.3089	1.1419	2.23157	4.45285e-06	3.20402e-05
Potri.005G140000	-1.70871	-0.43868	0.349718	-0.522003	0.000116437	0.000844401		Potri.003G160400	2.89099	3.47355	2.25757	3.0978	4.57957e-06	3.285e-05
Potri.003G001100	-2.19017	-5.5125	-5.5125	-1.1212	0.000116438	0.000844401		Potri.016G137900	2.68662	2.82853	3.47945	1.87106	4.69835e-06	3.35893e-05
Potri.016G066100	-0.673753	-1.14931	0.653657	-0.329152	0.000117612	0.000852031		Potri.010G085600	4.65317	5.19952	4.42328	4.53631	4.70557e-06	3.36323e-05
Potri.002G118000	-0.897074	0.627888	-0.728403	-5.17604	0.000118359	0.000856551		Potri.003G022800	3.44074	4.54627	2.49553	6.75679	4.7247e-06	3.3743e-05
Potri.005G176200	-1.40035	-2.43931	-5.97159	0.362958	0.000119608	0.000864917		Potri.018G127600	-1.9923	-5.81958	-5.81958	-5.81958	4.73175e-06	3.37847e-05
Potri.001G147700	-2.11288	-3.2613	-2.62643	-4.09735	0.000121056	0.000874378		Potri.001G360400	-3.58471	-5.69189	-5.69189	-5.69189	4.75454e-06	3.39387e-05
Potri.006G165900	-1.34413	-2.36499	-5.92442	-5.92442	0.000121074	0.000874378		Potri.009G099500	-2.15784	-1.71365	-1.47731	-1.31947	4.76554e-06	3.39997e-05
Potri.018G088300	-0.166191	0.0108775	-1.64408	-0.359239	0.000121178	0.000874903		Potri.019G028300	-2.10665	-3.53525	-1.55132	-1.94209	4.81302e-06	3.42945e-05
Potri.001G348300	-1.12167	-0.57108	0.6557	0.716911	0.000121565	0.000877246		Potri.008G198400	-4.26619	-6.37424	-3.01049	-1.85093	4.82849e-06	3.43871e-05
Potri.007G048000	0.408946	0.21737	-1.37933	-0.520233	0.0001223	0.000881637		Potri.014G192700	3.84064	3.06865	5.1089	7.34021	4.87633e-06	3.471e-05
Potri.013G050100	-3.17785	-0.850672	-5.64237	-5.64237	0.000122555	0.000883018		Potri.005G139300	3.746	2.72345	2.84832	4.06826	4.92697e-06	3.50235e-05
Potri.005G046700	-1.08126	-1.35962	0.0644772	-0.132708	0.000122617	0.000883236		Potri.019G078300	2.85863	2.99932	1.87705	3.66239	4.92794e-06	3.50235e-05
Potri.003G156600	0.326429	-0.146836	-0.298075	-2.70124	0.000124308	0.000894032		Potri.007G023100	-6.09575	-2.47614	-6.09575	-1.31041	4.96551e-06	3.52635e-05
Potri.001G164300	-0.526084	-0.82245	-2.25612	0.0464239	0.000124342	0.000894041		Potri.009G164800	-2.39549	-2.39549	3.37965	-2.39549	4.97392e-06	3.53052e-05
Potri.001G064900	-4.17221	-1.54131	-4.10002	0.19928	0.000124484	0.000894833		Potri.011G010900	-2.20019	-5.9129	-2.63935	-3.14632	4.98933e-06	3.53964e-05
Potri.013G003400	-0.108307	-1.14494	0.94389	-0.0371296	0.000124633	0.000895538		Potri.015G040600	4.78143	7.07858	5.58021	5.48961	4.99162e-06	3.54037e-05
Potri.003G201700	-1.25431	-2.24511	-0.461847	-0.245437	0.000124977	0.000897449		Potri.013G074800	-2.99	-6.82497	-2.2441	-1.18602	5.00037e-06	3.54567e-05
Potri.002G113600	-0.608508	0.340849	-2.48122	-0.933629	0.000125077	0.000897937		Potri.002G079000	-1.99707	1.7228	-1.79255	-5.64339	5.02016e-06	3.55698e-05
Potri.006G029900	-1.97798	0.513126	0.23794	0.876069	0.000125293	0.000899023		Potri.003G216100	-2.58685	-1.7425	-3.91846	-2.06314	5.13599e-06	3.6298e-05
Potri.008G061800	0.621914	0.513244	0.83911	-7.49404	0.000125457	0.000899968		Potri.018G139200	-2.98821	-2.84507	-5.085	1.47878	5.21801e-06	3.67935e-05
Potri.010G122900	0.49569	0.169212	-1.23121	-1.3237	0.000125671	0.00090102		Potri.008G189700	3.44195	3.09816	5.80005	6.41621	5.38353e-06	3.79125e-05
Potri.001G253900	-0.596588	-1.27309	0.435997	0.276749	0.000126483	0.00090616		Potri.018G084300	2.85584	1.97899	3.44815	3.60057	5.45152e-06	3.83718e-05
Potri.013G016100	-1.13488	0.949289	-1.28688	-1.28982	0.000126874	0.00090873		Potri.001G089000	-2.20757	-5.12618	-2.63513	1.12645	5.46331e-06	3.84354e-05
Potri.003G128200	0.910276	0.0931753	-1.44808	0.0582361	0.000127336	0.000911803		Potri.010G145200	-1.07701	-1.0632	-4.50992	-3.70099	5.49807e-06	3.86701e-05
Potri.012G066000	0.80106	0.408064	-2.61999	-1.10848	0.000127439	0.000912306		Potri.013G047900	-1.53734	-1.64823	-1.60796	-1.98803	5.51639e-06	3.87892e-05
Potri.007G067500	-1.0551	-1.53227	-1.40952	-0.889393	0.000127976	0.000915681		Potri.008G164800	2.59436	3.42537	3.19989	4.26968	5.54234e-06	3.89322e-05
Potri.001G330800	-1.15775	-1.82943	0.0194433	0.0612707	0.000128267	0.000917526		Potri.009G145900	-2.2143	-2.33587	-1.52083	-2.11	5.62247e-06	3.94752e-05
Potri.001G234500	-0.747358	-0.448103	0.685839	-3.8359	0.000128826	0.000921288		Potri.008G200200	-1.94744	-3.30781	-1.54563	-1.63147	5.6504e-06	3.96331e-05
Potri.005G085600	0.138401	0.865679	-1.87261	-0.523681	0.000129261	0.000923924		Potri.014G058600	4.90222	4.53011	5.46882	7.91648	5.66803e-06	3.97448e-05
Potri.014G197800	-0.330217	-0.580561	-2.37107	-0.340937	0.0001299	0.000928256		Potri.005G084700	2.42255	1.10407	1.55487	1.81889	5.73404e-06	4.01874e-05
Potri.002G157000	-0.831622	-1.19035	0.494394	0.29834	0.000130377	0.000930469		Potri.008G044000	-1.72965	-2.21438	-4.77205	-1.56305	5.76123e-06	4.03678e-05
Potri.006G062200	-0.420024	-0.416228	0.74385	-1.50761	0.000131475	0.000937825		Potri.011G114500	1.98719	1.97813	3.77014	2.30934	5.76943e-06	4.04049e-05
Potri.006G180100	-1.9986	-1.55087	-0.7784	-0.699462	0.000132575	0.000944178		Potri.002G191100	-3.25629	1.99204	2.87252	3.3041	5.8351e-06	4.08443e-05
Potri.009G129400	-2.59349	-0.930322	-0.762199	-0.127321	0.000133394	0.00094909		Potri.010G010500	2.51206	2.24125	1.80446	1.58981	5.89378e-06	4.12031e-05
Potri.004G199600	-1.18803	-0.887322	0.329286	0.375521	0.00013362	0.000950451		Potri.004G033300	1.37166	1.69735	1.27588	3.41177	5.91432e-06	4.13363e-05
Potri.015G029200	-3.06724	0.410846	0.829215	0.202513	0.00013385	0.000951848		Potri.012G089300	3.16792	1.93982	1.19642	1.32449	6.00416e-06	4.19431e-05
Potri.003G030900	-1.74744	-0.735821	-0.51532	-0.212846	0.000135071	0.000959061		Potri.011G095900	4.77586	6.61056	3.87348	3.83327	6.08664e-06	4.24766e-05
Potri.017G059100	0.600149	0.214471	0.705829	-3.64339	0.000135443	0.000961458		Potri.001G239700	-2.81759	-6.05386	-1.55457	-1.14721	6.10202e-06	4.25732e-05
Potri.005G062300	-1.75816	-1.27737	-2.4125	-2.2553	0.000135517	0.000961733		Potri.018G114200	3.18381	3.58835	2.87513	1.9889	6.14369e-06	4.27888e-05
Potri.T119200	-1.02348	-1.55486	-1.6527	-0.73277	0.000135885	0.000964104		Potri.004G122600	-1.67416	-1.28577	-2.68999	-1.51481	6.16057e-06	4.28956e-05
Potri.001G415600	-0.531959	-0.717259	-1.99651	-1.7329	0.000135945	0.000964282		Potri.014G031700	2.54218	2.3708	1.51211	4.81241	6.18955e-06	4.30758e-05
Potri.003G220300	0.443995	-0.0166037	-1.44091	-0.255462	0.000137203	0.000971967		Potri.005G239900	-1.18939	-2.6636	-1.00235	-1.42366	6.24326e-06	4.33953e-05
Potri.001G175400	-1.80716	-0.200273	-1.05365	-1.25409	0.00013737	0.000972321		Potri.006G042200	6.06939	4.40395	4.31869	2.44199	6.27406e-06	4.35767e-05
Potri.006G060400	-0.823488	-1.09754	0.494123	-0.119278	0.000137735	0.000974249		Potri.012G038000	1.85821	1.31691	3.60217	4.49067	6.30578e-06	4.3786e-05
Potri.015G118800	-2.00013	-0.450582	-0.235547	0.469953	0.00013801	0.000975946		Potri.013G065300	-2.56748	-6.39504	-6.39504	-2.56978	6.32164e-06	4.38852e-05
Potri.001G460800	-2.71811	-1.38547	-1.40659	-6.56243	0.000138905	0.000981536		Potri.014G135900	3.71779	2.17644	4.32871	3.609	6.335e-06	4.39669e-05
Potri.005G018700	-1.31688	-0.953712	-2.23228	-0.444557	0.000138906	0.000981536		Potri.014G174100	3.90106	3.06519	1.10199	2.9108	6.51989e-06	4.51824e-05
Potri.003G222200	-0.60541	-1.61885	-0.0959954	-0.580675	0.000140259	0.000990343		Potri.007G108400	6.65339	3.09992	6.08523	4.78357	6.52251e-06	4.51894e-05
Potri.012G057900	0.438951	0.807475	-1.75879	-0.853015	0.000140817	0.000993683		Potri.003G050400	-1.23028	-4.14795	-1.65598	2.1871	6.53228e-06	4.52458e-05
Potri.013G119500	-2.11688	0.22641	-2.22767	-2.32401	0.000140928	0.000994058		Potri.007G088300	5.06812	5.14002	4.54842	5.04437	6.53679e-06	4.52657e-05
Potri.015G140800	-2.63286	3.72226	-8.74615	-6.17506	6.67332e-65	6.19774e-61		Potri.009G100400	-1.96106	-1.10601	-1.34032	1.20106	6.55915e-06	4.53979e-05
Potri.014G029000	-4.53182	3.53063	-4.42786	-4.06463	6.44912e-63	4.49214e-59		Potri.008G119800	2.18215	1.61264	1.93238	2.71991	6.73412e-06	4.64586e-05
Potri.017G083500	4.4959	-3.13873	0.748645	-1.9784	5.53765e-59	2.20414e-55		Potri.010G009700	3.24522	4.43782	3.39109	1.5304	6.74672e-06	4.6534e-05
Potri.004G019900	4.59516	-1.02543	-1.10913	-0.0799956	1.86796e-52	5.2045e-49		Potri.001G178400	2.56166	1.55773	1.67009	1.83308	6.8812e-06	4.73595e-05
Potri.010G105700	0.399627	2.57913	-3.94743	-2.2415	7.7861e-48	1.2761e-44		Potri.005G049500	-2.25354	-1.76842	-1.80575	-1.22689	6.88175e-06	4.73595e-05
Potri.008G029300	-2.32936	1.95407	-3.14644	-2.31864	2.30198e-45	2.91535e-42		Potri.T079800	3.75491	5.4306	3.06103	3.05177	6.9073e-06	4.75118e-05
Potri.009G101400	0.301824	4.50316	-4.61855	-1.81556	1.61423e-44	1.79902e-41		Potri.019G059000	3.60391	2.81958	2.68993	4.24011	6.92849e-06	4.76458e-05
Potri.001G031800	-1.16902	-4.97691	1.74379	0.633255	1.27191e-42	1.31252e-39		Potri.003G187100	3.49778	3.54226	4.58152	2.37799	6.96537e-06	4.78876e-05
Potri.008G135200	-1.85737	2.74264	-5.69435	-2.63555	5.65987e-42	5.43777e-39		Potri.019G073700	5.27087	3.79647	3.43178	3.87666	7.02305e-06	4.82364e-05
Potri.006G173500	4.26833	-0.406574	0.534447	-0.113765	2.65134e-40	2.38295e-37		Potri.004G234200	-1.88099	-4.87069	-3.20928	-1.7675	7.07336e-06	4.85401e-05
Potri.017G047800	-0.493317	-0.0480419	5.0662	-0.478128	3.17685e-39	2.39226e-36		Potri.012G029700	2.14856	1.49515	3.06796	1.45698	7.1082e-06	4.8761e-05
Potri.009G041800	-0.740471	1.82066	-4.60399	-2.61136	4.06695e-39	2.98193e-36		Potri.017G153200	5.0965	5.41081	2.49092	6.55199	7.13072e-06	4.88552e-05
Potri.006G118400	4.17901	0.357779	0.923655	-0.313691	1.5379e-38	1.0451e-35		Potri.005G166500	1.75545	2.13956	2.2466	2.78361	7.27096e-06	4.97547e-05
Potri.006G171700	4.46535	-0.328003	0.767486	0.00280607	6.78365e-37	4.10883e-34		Potri.010G146400	3.02927	2.268	2.28111	2.19992	7.28702e-06	4.98401e-05
Potri.012G134100	0.406999	0.445951	4.40833	-0.154829	5.3892e-35	2.83309e-32		Potri.005G228400	-1.08899	-1.16831	1.25722	2.57782	7.32618e-06	5.00463e-05
Potri.010G200500	-1.03799	-5.09757	1.04506	0.33029	6.59123e-34	3.16629e-31		Potri.013G022100	-1.37636	-1.48506	-1.74628	-1.81837	7.61569e-06	5.19347e-05
Potri.017G067600	-0.812395	1.17651	-6.2208	-1.93547	1.43116e-33	6.53689e-31		Potri.005G028400	-2.37946	-2.37946	-2.37946	3.50467	7.63687e-06	5.20536e-05
Potri.001G219300	3.50428	-0.215221	0.73139	-0.385932	7.36159e-33	3.15552e-30		Potri.002G118800	1.57832	2.71874	1.96146	1.34223	7.71223e-06	5.25157e-05
Potri.001G016200	-0.000734306	2.72501	-2.03427	-1.23652	1.41857e-32	5.72814e-30		Potri.010G156400	-2.75908	-3.7549	-3.45854	-1.50354	7.75436e-06	5.27767e-05
Potri.015G022100	-0.000782854	-3.86482	2.80091	0.488473	1.58759e-32	6.31908e-30		Potri.003G003300	2.52169	2.03365	1.42761	2.79868	7.78709e-06	5.29735e-05
Potri.012G017600	3.78562	-0.0418964	0.395508	0.79829	3.8463e-32	1.46802e-29		Potri.003G034700	-1.29176	-1.80484	-2.14109	-2.21293	7.84511e-06	5.33421e-05
Potri.003G045200	3.94758	0.892986	0.796853	0.255333	7.2326e-31	2.51893e-28		Potri.019G109900	3.70975	2.52453	2.54189	1.09848	7.94624e-06	5.39902e-05
Potri.002G097500	-1.62806	1.28654	-3.20317	-1.47499	1.04191e-29	3.26176e-27		Potri.015G011400	-2.8797	-2.77267	-1.92576	-3.01391	8.03955e-06	5.45308e-05
Potri.003G193800	0.186927	-4.20413	1.98957	0.569712	4.15574e-29	1.27239e-26		Potri.016G099200	6.41953	6.32193	3.88298	4.52645	8.06277e-06	5.4675e-05
Potri.018G141700	-1.73527	-3.42771	3.06142	0.503169	4.38521e-29	1.32805e-26		Potri.001G430900	-4.4222	-4.26626	-4.02742	-1.73737	8.11506e-06	5.49893e-05
Potri.012G002600	4.62013	0.24151	0.574954	0.531135	1.00688e-28	2.95301e-26		Potri.009G083300	2.69736	4.00851	3.10512	2.05074	8.22228e-06	5.56345e-05
Potri.009G017700	3.3818	0.504209	0.105234	-0.561922	5.74226e-28	1.64939e-25		Potri.001G146000	3.91756	3.62221	3.88368	3.48776	8.27998e-06	5.59704e-05
Potri.008G137700	0.38293	-1.01106	3.90227	-0.857464	1.73687e-27	4.79135e-25		Potri.003G005200	3.44244	6.32587	3.36146	3.29969	8.32652e-06	5.62577e-05
Potri.008G182000	3.1446	0.177042	-0.339247	-0.200113	4.19327e-27	1.12339e-24		Potri.010G115100	6.9824	5.7433	6.22874	6.07283	8.59575e-06	5.78797e-05
Potri.009G116400	-0.219383	1.21919	-3.64739	-0.685446	1.86312e-26	4.76242e-24		Potri.006G048200	3.07133	-2.24731	2.51189	1.42288	8.74549e-06	5.87741e-05
Potri.003G131200	-0.213951	-3.5352	1.54565	0.607012	4.85125e-26	1.15716e-23		Potri.010G096100	-2.81258	-4.3151	-1.05068	-2.0929	8.76878e-06	5.89021e-05
Potri.011G025200	-1.48049	1.10432	-4.48213	-1.95	1.90203e-25	4.3797e-23		Potri.008G093900	-3.18364	-2.73844	-2.38444	-1.50196	8.79545e-06	5.90385e-05
Potri.005G141800	0.0661161	-0.401264	2.91075	0.0830096	4.38998e-25	9.70744e-23		Potri.008G192000	1.28279	2.39351	1.32939	2.5943	8.86843e-06	5.94709e-05
Potri.004G155300	0.59869	1.54282	-2.70973	-0.785197	4.47255e-25	9.81214e-23		Potri.001G140900	5.06459	6.70034	3.35111	3.83	8.90385e-06	5.96796e-05
Potri.004G072900	-2.52235	1.07006	-3.68436	-1.27801	6.11623e-25	1.31085e-22		Potri.003G207900	4.14806	4.29118	6.89546	5.87076	8.96483e-06	6.00304e-05
Potri.001G066200	3.12728	0.570155	0.219907	0.292262	4.2096e-24	8.81865e-22		Potri.001G436200	-1.39746	-1.4914	1.12626	1.32933	9.01386e-06	6.03007e-05
Potri.014G134000	3.06431	-2.43446	-1.92293	0.20416	4.59024e-24	9.54427e-22		Potri.T170200	-2.23833	-1.12401	-1.27994	-1.40973	9.05162e-06	6.05096e-05
Potri.019G128100	0.128939	-0.979488	2.71774	0.685779	7.72763e-24	1.5602e-21		Potri.012G018300	-4.903	-4.903	-2.42713	1.18	9.17153e-06	6.1267e-05
Potri.016G028900	-0.448068	1.20603	-3.76265	-1.11991	9.22076e-24	1.84826e-21		Potri.015G077400	-5.62199	-5.62199	-5.62199	-5.62199	9.17425e-06	6.12704e-05
Potri.010G112200	0.244043	-2.98625	1.60822	0.533095	2.04434e-23	4.03967e-21		Potri.003G131600	6.68251	4.96147	4.59014	6.16548	9.19849e-06	6.14176e-05
Potri.017G135000	-0.159765	-0.892912	3.63917	-2.09051	2.77552e-23	5.4078e-21		Potri.002G011400	3.61399	2.43984	2.13971	2.7267	9.27087e-06	6.18562e-05
Potri.007G015200	-0.951431	-3.13752	1.00859	0.770015	3.16929e-23	6.08984e-21		Potri.T175600	-3.67546	-3.53296	-3.24669	-1.33714	9.2945e-06	6.1999e-05
Potri.002G185700	-0.785083	-3.01388	1.90327	0.431352	3.64081e-23	6.94796e-21		Potri.T126700	2.29961	1.86446	2.54066	1.87922	9.34718e-06	6.22608e-05
Potri.005G054600	-0.789946	-3.70682	1.27039	0.362962	5.82613e-23	1.08945e-20		Potri.005G079100	-2.53434	-3.2	-2.0913	1.09775	9.3515e-06	6.22746e-05
Potri.001G234600	-0.321153	0.37329	3.04644	-0.442203	7.66081e-23	1.39507e-20		Potri.001G080900	6.44011	3.60319	5.6663	3.83041	9.37552e-06	6.24047e-05
Potri.015G074200	-0.799741	-0.759917	2.66247	-0.517597	2.27059e-22	3.97881e-20		Potri.005G015700	4.26172	3.85636	3.97913	3.54364	9.39241e-06	6.25021e-05
Potri.008G186200	-2.92	1.54937	-2.64965	-1.30558	2.70748e-22	4.65654e-20		Potri.T076200	-1.29173	-2.09556	-2.25237	-1.74553	9.39496e-06	6.25026e-05
Potri.007G134800	0.452581	0.989954	3.65592	0.630208	5.88928e-22	9.76709e-20		Potri.001G213500	4.33046	5.03415	4.52066	3.0878	9.39698e-06	6.25026e-05
Potri.016G004400	-1.81384	0.246886	3.30428	0.609092	6.97648e-22	1.15017e-19		Potri.003G221700	-5.46126	-5.46126	-5.46126	-5.46126	9.45487e-06	6.28557e-05
Potri.014G017300	0.997003	0.322304	3.79976	-0.196782	9.04067e-22	1.48171e-19		Potri.008G142900	-3.08019	-1.93313	-1.7255	-1.09273	9.56425e-06	6.34937e-05
Potri.017G041700	-2.75333	-5.09387	1.11746	-0.0318035	1.23932e-21	1.99595e-19		Potri.019G050200	-3.26602	-1.00633	-3.26602	3.08403	9.5839e-06	6.36089e-05
Potri.003G143600	3.21566	-0.142084	0.503538	0.893458	2.68431e-21	4.13206e-19		Potri.015G148400	-2.18767	-3.7856	-6.02886	-6.02886	9.59132e-06	6.3643e-05
Potri.016G037600	-1.72316	-2.65659	1.19783	0.660195	4.4046e-21	6.63356e-19		Potri.T100100	5.98827	7.48224	6.01313	6.67851	9.66294e-06	6.4057e-05
Potri.009G035000	-1.63155	2.25175	-3.11829	-1.36021	8.21416e-21	1.22387e-18		Potri.010G142800	2.9304	1.96096	5.60047	4.72217	9.94399e-06	6.57008e-05
Potri.004G057700	2.90887	0.707633	0.1371	-0.22979	8.44734e-21	1.25191e-18		Potri.001G006600	-3.94877	-2.9787	-3.52618	2.34311	9.98849e-06	6.59634e-05
Potri.019G086200	-4.0872	0.845611	4.75044	0.324691	1.13952e-20	1.66227e-18		Potri.007G007800	-4.15697	-7.09641	-1.86591	-1.61595	1.00112e-05	6.60863e-05
Potri.012G038300	-0.832424	-2.97011	1.14136	0.443233	1.24649e-20	1.80884e-18		Potri.015G132800	-2.48042	-2.59917	-4.11272	-6.59037	1.01859e-05	6.71398e-05
Potri.006G277500	-0.893814	-2.94468	2.4483	0.305782	1.43947e-20	2.05674e-18		Potri.001G410400	7.1433	5.24852	6.32026	5.50592	1.05578e-05	6.94592e-05
Potri.006G214300	-1.41718	-3.28574	1.00931	-0.339403	3.23279e-20	4.45901e-18		Potri.003G152400	4.24743	3.13631	4.97853	3.10624	1.07439e-05	7.055e-05
Potri.008G105300	3.8424	0.810366	0.693917	0.913517	4.87102e-20	6.6203e-18		Potri.001G303000	4.78065	3.96176	5.49488	2.38522	1.07646e-05	7.06688e-05
Potri.004G162400	-0.641671	-3.44756	1.08199	0.97846	7.42623e-20	9.71708e-18		Potri.010G121200	6.05905	6.02182	7.37197	6.5475	1.07887e-05	7.07941e-05
Potri.001G406600	0.425756	-1.0048	2.8563	0.864182	9.98128e-20	1.28749e-17		Potri.T079500	3.14707	3.54362	2.83444	2.36511	1.09055e-05	7.1442e-05
Potri.003G111500	0.264255	-1.64324	3.09528	0.98183	2.04411e-19	2.54255e-17		Potri.006G229700	-4.63716	-3.64626	-4.23908	-1.1024	1.0993e-05	7.19476e-05
Potri.002G060500	-1.07666	-0.108708	4.37272	-4.38748	2.12612e-19	2.63279e-17		Potri.017G008200	-4.23903	-6.3346	-6.3346	-2.11312	1.10094e-05	7.2021e-05
Potri.001G160400	-2.18866	-1.87858	1.42278	0.543801	2.8638e-19	3.49961e-17		Potri.008G172700	-1.88994	-1.26828	-1.80264	-1.51613	1.10245e-05	7.20856e-05
Potri.006G112500	0.344583	0.944468	3.7799	-0.617606	6.27551e-19	7.47214e-17		Potri.001G268500	2.20045	1.45814	1.83076	4.34555	1.10772e-05	7.23796e-05
Potri.004G187400	-0.806314	-0.251384	5.28693	-5.02274	7.3356e-19	8.58758e-17		Potri.018G042100	-1.68676	-1.343	-3.88326	-1.29859	1.11734e-05	7.29737e-05
Potri.011G132900	-1.96867	2.10865	-3.53916	-1.34432	7.98649e-19	9.31044e-17		Potri.006G009500	6.27986	4.30888	3.36253	2.43824	1.13264e-05	7.38859e-05
Potri.004G226900	2.88093	0.757849	-0.0181306	-0.683554	8.0802e-19	9.38044e-17		Potri.009G048300	6.31075	5.1236	2.49118	3.83045	1.13945e-05	7.42953e-05
Potri.005G076000	0.129947	1.71193	-2.93143	-0.869891	1.65872e-18	1.89406e-16		Potri.010G060600	-1.70617	-4.40072	-6.65572	-2.13651	1.14322e-05	7.44925e-05
Potri.010G002500	0.599572	-1.5288	1.97925	0.154802	2.33688e-18	2.6044e-16		Potri.017G018700	4.02412	3.37074	5.50955	2.77688	1.14597e-05	7.46503e-05
Potri.004G140000	-1.28186	-2.42873	1.76473	0.279282	2.66251e-18	2.93213e-16		Potri.013G052900	-4.23917	-2.03086	-6.33929	-1.81528	1.14737e-05	7.4724e-05
Potri.002G134300	-1.04806	-2.93369	1.15761	0.250343	2.93542e-18	3.20732e-16		Potri.005G069500	3.20208	2.71374	2.51633	1.45925	1.15442e-05	7.51306e-05
Potri.002G224100	2.99778	0.486179	-0.610878	-3.65119	3.36807e-18	3.63725e-16		Potri.001G291700	-2.70054	-1.49254	-1.05209	-1.86562	1.16838e-05	7.59149e-05
Potri.017G026100	3.24726	0.486779	-0.801462	0.463627	3.67076e-18	3.94884e-16		Potri.006G138900	6.19478	5.48574	6.01114	7.4429	1.17395e-05	7.62585e-05
Potri.010G216200	2.44595	-0.19642	-0.796826	-0.644501	6.59951e-18	6.91262e-16		Potri.004G136700	7.0701	3.10629	6.27456	6.66276	1.18499e-05	7.69218e-05
Potri.001G263400	3.84934	0.746782	-0.266314	0.97681	8.00039e-18	8.22535e-16		Potri.006G234200	-1.05864	-2.66933	-1.30003	-1.15604	1.20732e-05	7.82433e-05
Potri.012G087700	-6.92213	-2.00174	-0.603533	2.75812	1.17976e-17	1.18239e-15		Potri.004G106400	3.20112	2.71931	1.48939	1.6496	1.22757e-05	7.93894e-05
Potri.014G161300	3.32669	0.457341	0.275499	0.276761	1.43925e-17	1.42699e-15		Potri.010G255100	-5.47097	-5.47097	-5.47097	-5.47097	1.23638e-05	7.98661e-05
Potri.001G225900	-7.51479	-0.982728	1.30346	-1.86754	1.4443e-17	1.42699e-15		Potri.016G034400	-4.82616	-4.67987	-2.3145	-1.57478	1.24953e-05	8.06596e-05
Potri.016G131800	0.296492	2.84924	0.246905	-4.31409	1.48388e-17	1.46092e-15		Potri.009G105400	3.81967	3.26321	3.15603	2.91612	1.25822e-05	8.11072e-05
Potri.005G141100	2.80256	0.29203	0.404502	0.675012	1.53925e-17	1.51009e-15		Potri.010G067800	-2.37726	1.264	4.47025	2.60784	1.27475e-05	8.20587e-05
Potri.003G115300	-0.924395	-2.2701	1.71271	0.771536	1.65744e-17	1.61467e-15		Potri.010G240800	2.96846	2.0808	1.21429	1.47638	1.28795e-05	8.28122e-05
Potri.008G002500	2.39301	0.493534	-0.837974	0.585954	2.21478e-17	2.12787e-15		Potri.005G107700	2.58643	2.99061	1.13167	3.77585	1.28969e-05	8.29055e-05
Potri.004G121800	-0.936102	-2.7605	1.13792	0.680144	2.34485e-17	2.22977e-15		Potri.002G012500	2.29037	2.86384	1.32933	2.1084	1.2947e-05	8.31506e-05
Potri.001G265400	-0.663294	-2.81014	1.15555	0.245154	2.50405e-17	2.37305e-15		Potri.004G087200	-3.75302	-5.86411	-5.86411	-5.86411	1.29936e-05	8.34305e-05
Potri.010G191300	-0.538252	-0.494419	2.64628	0.338357	3.08082e-17	2.89993e-15		Potri.019G122900	-2.27673	-2.11598	-3.0798	-3.54522	1.32792e-05	8.51067e-05
Potri.001G087500	3.01017	0.0143705	0.282837	0.603593	3.47483e-17	3.24885e-15		Potri.001G091900	-1.43643	-1.1939	-1.59763	-1.60303	1.33864e-05	8.57546e-05
Potri.012G070700	-2.01431	-2.05155	1.13821	-0.552956	3.56471e-17	3.32174e-15		Potri.012G028000	2.70176	3.22537	1.87096	1.48559	1.3589e-05	8.69722e-05
Potri.014G124500	0.453026	-2.23049	3.82661	-4.10593	3.99395e-17	3.68475e-15		Potri.017G116200	1.57216	1.68858	3.00578	2.99196	1.36681e-05	8.74378e-05
Potri.008G134000	0.283952	-0.283823	4.53123	-0.897758	4.0271e-17	3.70307e-15		Potri.001G166200	6.66977	5.89982	3.36605	4.52612	1.37078e-05	8.76718e-05
Potri.003G071100	-0.371103	0.398766	3.89054	0.716871	4.28952e-17	3.91391e-15		Potri.010G142900	-1.39245	-1.04557	2.28203	3.24135	1.37364e-05	8.78241e-05
Potri.008G192600	0.798827	0.942325	3.42683	0.546945	4.29853e-17	3.91391e-15		Potri.001G040800	6.59766	6.30387	6.75493	4.21427	1.37379e-05	8.78241e-05
Potri.016G088600	2.86052	0.114861	0.562567	0.809498	4.56621e-17	4.12221e-15		Potri.009G139700	1.94057	1.40085	3.11356	2.11467	1.39795e-05	8.9143e-05
Potri.007G048200	-0.0960753	0.537245	2.47593	-0.790118	4.82914e-17	4.2987e-15		Potri.011G025000	2.10019	3.61934	6.22946	3.83324	1.4119e-05	8.98473e-05
Potri.004G179500	3.06228	0.609291	0.813902	-0.7883	4.85838e-17	4.31096e-15		Potri.011G034900	-1.07404	-3.23909	-4.17478	-1.91242	1.41418e-05	8.99713e-05
Potri.015G085500	7.22535	0	0	0	6.18082e-17	5.43249e-15		Potri.007G138900	-3.47665	-5.58398	-5.58398	-5.58398	1.41942e-05	9.02841e-05
Potri.009G027700	-1.16004	0.976849	3.95667	-2.43918	6.89324e-17	6.02067e-15		Potri.005G024900	6.14367	3.06369	7.984	5.32935	1.42513e-05	9.05849e-05
Potri.012G021600	-0.986633	0.567605	5.16496	0.162619	6.9275e-17	6.03169e-15		Potri.014G162800	2.9314	2.53865	2.58036	2.34717	1.43081e-05	9.09256e-05
Potri.002G255800	2.81652	0.202158	0.551548	0.276937	7.26122e-17	6.28298e-15		Potri.001G310800	4.93743	4.56359	5.08681	6.9058	1.45112e-05	9.20899e-05
Potri.001G226100	-10.612	-0.821385	1.66465	-1.76034	1.20881e-16	1.02371e-14		Potri.003G007600	2.07684	3.89908	4.20379	1.92848	1.46304e-05	9.27614e-05
Potri.009G104300	-0.417428	1.00519	-3.32999	-1.29228	1.34823e-16	1.13146e-14		Potri.T095700	6.95694	6.43994	6.8266	6.24779	1.473e-05	9.3329e-05
Potri.019G051200	-2.17359	-1.39943	1.58048	0.696976	1.97946e-16	1.63655e-14		Potri.T104100	5.14244	4.83177	4.9302	2.14914	1.47662e-05	9.34947e-05
Potri.004G200400	0.673294	0.951785	3.62972	0.119481	2.16315e-16	1.77264e-14		Potri.009G143100	5.74961	6.67028	5.23468	4.22377	1.48242e-05	9.38189e-05
Potri.010G062900	0.61489	-0.5504	2.6032	0.736818	2.25855e-16	1.84539e-14		Potri.012G103400	1.50238	1.23431	-1.68656	-1.78251	1.50769e-05	9.52446e-05
Potri.001G061800	0.82155	2.85612	-2.38388	-1.48837	4.38887e-16	3.49379e-14		Potri.004G162000	1.60036	3.74952	3.76225	1.42281	1.51011e-05	9.53763e-05
Potri.017G059400	3.31612	0.487378	0.511868	0.552146	5.3393e-16	4.22624e-14		Potri.001G307500	7.68309	4.97687	6.84886	6.05713	1.52016e-05	9.59673e-05
Potri.014G078000	-2.18315	-2.79867	1.15014	0.418025	5.4425e-16	4.29572e-14		Potri.005G009700	3.25643	2.7434	3.4492	2.21952	1.52754e-05	9.63678e-05
Potri.010G175200	-0.774301	-2.20073	4.26802	0.605917	7.51211e-16	5.79785e-14		Potri.017G081700	-4.24279	-4.07868	-1.04311	1.22952	1.52796e-05	9.63723e-05
Potri.002G082100	1.60531	0.407837	-1.89569	-0.102718	8.14576e-16	6.26953e-14		Potri.013G110700	2.28338	1.5083	1.85261	1.54484	1.52864e-05	9.63929e-05
Potri.013G100400	-6.88132	-3.69641	1.30103	0.0279593	1.15743e-15	8.73936e-14		Potri.013G031400	-2.46444	-1.26756	-1.50854	-1.21658	1.53683e-05	9.68215e-05
Potri.002G166300	-0.421929	-0.812503	2.58967	0.408638	1.67398e-15	1.22416e-13		Potri.015G086800	1.88396	2.28364	2.20691	2.13008	1.54141e-05	9.70444e-05
Potri.009G047600	-3.11198	-1.64484	3.34339	-0.247487	1.83515e-15	1.32464e-13		Potri.006G037500	-2.02219	-2.84463	-2.17944	-2.53178	1.55758e-05	9.79295e-05
Potri.008G068200	-1.04634	1.07404	-2.31587	-0.956113	2.08069e-15	1.49799e-13		Potri.018G111800	-5.58385	-5.58385	-5.58385	-1.75054	1.56675e-05	9.83945e-05
Potri.001G236400	2.49991	0.903102	-0.614633	-0.0123675	2.33942e-15	1.6713e-13		Potri.007G007500	-1.82012	-3.39109	-2.88803	-1.64613	1.57272e-05	9.87027e-05
Potri.T141900	0.615748	-0.547519	4.88603	0.723287	3.25887e-15	2.2987e-13		Potri.013G034700	-1.36787	-4.45113	-4.12738	-2.07475	1.59044e-05	9.97247e-05
Potri.001G337400	1.19195	0.283447	-2.81442	-0.757417	3.40134e-15	2.39314e-13		Potri.004G178600	-1.96588	-1.30503	-1.15471	-1.43044	1.60015e-05	0.000100288
Potri.T167900	7.61395	0	0	0	4.5841e-15	3.16928e-13		Potri.001G267600	1.06805	-1.90274	-1.6517	2.66487	1.60686e-05	0.00010064
Potri.005G139200	3.58874	-0.442272	0.541277	0.360413	5.98886e-15	4.08975e-13		Potri.T168800	1.19405	1.24543	2.2095	1.84985	1.61861e-05	0.000101308
Potri.010G113400	2.08242	0.457912	-2.59384	-0.0569219	6.57299e-15	4.44507e-13		Potri.001G158600	6.1955	3.9853	2.49146	3.29986	1.61916e-05	0.000101319
Potri.011G122400	0.384992	1.36784	-3.95286	0.619678	6.73825e-15	4.54579e-13		Potri.013G032700	-3.24472	2.23372	3.838	2.08792	1.6228e-05	0.000101524
Potri.005G022600	2.66709	0.50184	-0.236479	0.306217	7.35596e-15	4.92673e-13		Potri.009G024300	3.54764	4.18255	3.01673	3.64853	1.63137e-05	0.000101992
Potri.002G260900	-1.86585	-1.67922	1.89313	0.777247	7.64827e-15	5.098e-13		Potri.006G094100	-2.92564	-5.86383	-5.86383	-5.86383	1.67473e-05	0.000104561
Potri.014G188200	-0.366903	-3.70747	-3.70747	4.48899	9.11705e-15	6.03371e-13		Potri.017G060800	2.66038	2.38157	1.43819	1.21371	1.69018e-05	0.000105387
Potri.009G094100	-2.80382	-3.80784	1.51027	-0.0510372	1.08215e-14	7.11107e-13		Potri.017G013700	4.62697	2.52038	2.35434	4.44787	1.69238e-05	0.000105451
Potri.005G024500	3.09732	0.144264	0.453125	0.893628	1.23926e-14	8.04854e-13		Potri.011G027000	-1.89507	-4.7233	-1.95301	-2.42626	1.7037e-05	0.000106024
Potri.015G004800	-0.619598	-0.514588	2.46872	-0.27348	1.32589e-14	8.59115e-13		Potri.011G030000	3.8273	6.26285	5.22606	2.43811	1.71492e-05	0.000106592
Potri.016G113700	-1.55567	2.4214	-0.0163743	0.107225	1.36704e-14	8.83726e-13		Potri.001G230600	3.53132	3.68866	3.70766	4.32045	1.73176e-05	0.000107567
Potri.013G141000	-0.294839	-1.51341	-2.36445	2.64995	1.52238e-14	9.68413e-13		Potri.T159200	5.35007	4.3236	6.85048	2.43332	1.73788e-05	0.000107922
Potri.003G018600	-0.189724	-0.644748	2.42642	0.857571	1.59056e-14	1.00719e-12		Potri.014G021900	2.84708	2.48422	1.34098	2.83383	1.74828e-05	0.000108471
Potri.012G022000	2.70442	0.590445	0.336004	0.405834	1.77189e-14	1.1119e-12		Potri.016G003000	4.13198	6.38624	6.48298	5.85871	1.77742e-05	0.000110063
Potri.017G090100	-0.488793	-2.06068	1.0804	0.581144	1.95316e-14	1.22016e-12		Potri.014G001400	-1.69791	-7.23819	-1.72993	-2.25113	1.77952e-05	0.000110164
Potri.016G070200	-1.45086	-2.77167	1.05054	-0.250738	3.00711e-14	1.82536e-12		Potri.005G057000	2.31276	3.83499	1.0258	3.37755	1.78711e-05	0.00011056
Potri.016G022000	2.64274	0.738731	-0.451894	0.657209	3.07077e-14	1.85995e-12		Potri.001G226500	6.82075	3.97299	7.05589	4.76755	1.79567e-05	0.00011104
Potri.006G236200	-1.24438	2.70044	-0.725466	-0.221803	3.81074e-14	2.27843e-12		Potri.003G201700	-2.64009	-1.7139	-1.64029	-2.3371	1.80788e-05	0.000111659
Potri.009G119200	-0.484267	-2.86791	1.11411	0.303583	4.16882e-14	2.48188e-12		Potri.001G049200	-1.67046	-2.85421	-1.31465	1.11878	1.81572e-05	0.00011208
Potri.003G018500	0.406708	-0.256226	2.28787	0.532659	4.45572e-14	2.63578e-12		Potri.012G141000	-2.74028	-2.53688	-1.77106	-3.6922	1.8337e-05	0.000112989
Potri.017G045100	-0.517956	0.0508918	3.99749	-0.336957	4.81825e-14	2.8442e-12		Potri.012G133500	-2.61394	-3.011	-3.64155	-2.78837	1.83628e-05	0.000113032
Potri.017G144800	-1.40062	-1.65315	1.05153	0.147897	4.96822e-14	2.92035e-12		Potri.018G131400	-4.43145	-2.16967	-4.43145	2.07015	1.83674e-05	0.000113032
Potri.007G090900	-2.38771	-1.36012	1.75639	0.589065	5.87011e-14	3.42161e-12		Potri.016G037000	4.77106	3.60452	6.532	5.62989	1.85512e-05	0.000114031
Potri.013G062800	2.20795	-0.125345	-0.642574	0.147309	7.60796e-14	4.37058e-12		Potri.006G240400	3.04514	2.12691	1.39814	1.41333	1.8592e-05	0.000114251
Potri.003G142300	-1.24884	-1.22225	1.30397	0.944746	1.03659e-13	5.88217e-12		Potri.011G055000	4.13269	2.6811	2.55698	2.09518	1.85951e-05	0.000114251
Potri.011G126800	-0.808627	-1.167	1.78224	-0.0314991	1.18039e-13	6.64406e-12		Potri.001G267500	3.08924	3.05814	1.22466	2.53762	1.87146e-05	0.000114909
Potri.005G002100	2.23224	0.217635	-0.267134	-0.866896	1.32177e-13	7.3802e-12		Potri.012G019200	2.15787	2.35148	1.7563	1.0605	1.90438e-05	0.000116698
Potri.001G450000	-0.646597	0.311023	2.48072	-0.584084	1.41174e-13	7.83544e-12		Potri.009G085600	4.94045	4.69844	2.13057	2.57898	1.94451e-05	0.000118764
Potri.004G172300	-3.89341	1.03948	-0.0175695	-2.1429	1.47558e-13	8.14111e-12		Potri.T121600	6.50644	5.4054	3.89306	4.22139	1.97043e-05	0.000120162
Potri.011G159400	6.82344	0	0	0	1.57345e-13	8.62979e-12		Potri.015G103900	2.23825	3.37774	1.85316	2.70862	1.98352e-05	0.000120934
Potri.T005800	-0.585193	-0.778075	-2.42903	2.18003	2.23786e-13	1.19676e-11		Potri.009G156000	-2.23682	-1.51703	-2.13204	1.31935	2.00499e-05	0.000122002
Potri.005G193400	0.222854	1.22654	-2.27199	-0.197102	2.46986e-13	1.31088e-11		Potri.014G065700	6.31661	5.25037	3.36238	3.29994	2.00842e-05	0.000122184
Potri.014G039400	-1.25158	-0.554171	-3.71707	3.93469	2.88544e-13	1.51687e-11		Potri.T030300	7.25752	7.37167	6.48933	6.52518	2.01023e-05	0.000122268
Potri.014G039500	-0.0273199	-1.54877	0.244013	4.06339	3.06092e-13	1.60006e-11		Potri.006G100000	-4.68435	-3.08778	-2.18792	-1.50122	2.03285e-05	0.000123508
Potri.005G058200	-1.09804	-2.7701	1.30835	0.498212	3.99492e-13	2.06505e-11		Potri.006G188400	2.49161	-1.28932	2.31444	2.09441	2.03816e-05	0.000123804
Potri.009G017600	3.04224	0.479876	-0.197999	-0.0460679	4.19354e-13	2.16371e-11		Potri.003G007400	1.99808	2.53271	3.93423	5.67047	2.1188e-05	0.000128142
Potri.010G170300	1.79428	-0.815946	-0.463674	-0.593594	4.59663e-13	2.34993e-11		Potri.004G217100	2.90463	-1.43379	3.23011	1.35875	2.17228e-05	0.000131148
Potri.012G081800	1.69293	-1.76903	0.707069	-0.23058	4.87557e-13	2.47437e-11		Potri.014G123400	2.45598	1.72766	2.48032	3.14127	2.22484e-05	0.000134059
Potri.002G256700	2.5181	-0.0921507	0.554299	0.900348	5.2973e-13	2.67379e-11		Potri.008G056400	2.56518	2.26801	2.61658	1.09238	2.28843e-05	0.000137533
Potri.003G117500	2.19862	0.127982	0.541992	-0.851596	5.34947e-13	2.68553e-11		Potri.006G002600	4.51439	1.90305	4.06074	3.8657	2.29517e-05	0.000137819
Potri.001G130100	-0.892721	1.73149	-3.10058	-3.03132	5.68499e-13	2.83354e-11		Potri.009G090800	2.78691	2.02236	1.62325	1.23208	2.30035e-05	0.000138011
Potri.T165400	4.41474	0.00615741	-3.18209	0.275129	6.84968e-13	3.35996e-11		Potri.003G182200	1.58417	1.25927	1.43728	2.54631	2.31075e-05	0.000138485
Potri.015G041300	0.42959	1.17884	-3.38942	-1.89976	7.13205e-13	3.48619e-11		Potri.T069600	-5.39943	-5.39943	-5.39943	-5.39943	2.31991e-05	0.000138944
Potri.019G078300	-0.507765	0.346218	3.1748	-0.73956	1.10633e-12	5.27816e-11		Potri.007G074700	-4.45097	-4.45097	-1.08832	1.4174	2.32297e-05	0.000139098
Potri.001G288100	-0.720304	0.66248	-0.629949	4.46696	1.13598e-12	5.41036e-11		Potri.015G026600	-1.8033	-1.87554	-2.54071	-2.25854	2.32606e-05	0.000139253
Potri.001G088900	-2.0194	-4.29389	1.6439	-0.0712808	1.24017e-12	5.85653e-11		Potri.002G010900	-1.50411	-1.71243	-1.98603	-1.42218	2.38705e-05	0.000142597
Potri.002G140300	-0.750032	-0.977901	1.8141	0.515886	1.2454e-12	5.87131e-11		Potri.006G182800	-1.33516	-5.94228	-5.94228	-3.50365	2.39709e-05	0.000143135
Potri.002G018400	-1.55144	1.34888	-2.53155	0.195157	1.61611e-12	7.47975e-11		Potri.012G060900	5.19433	4.6785	5.12934	4.51365	2.40351e-05	0.000143457
Potri.013G106200	0.655394	3.07291	-2.8403	0.738456	1.75517e-12	8.09646e-11		Potri.001G241400	-2.17354	-1.9953	-1.19072	-1.28095	2.40711e-05	0.000143611
Potri.004G052200	-0.0450008	1.06625	-2.21344	-1.75354	1.8155e-12	8.36091e-11		Potri.001G291800	-2.75751	-1.81211	-1.09764	-1.62982	2.42295e-05	0.000144494
Potri.008G126800	0.744069	-0.265138	2.22361	-0.18515	1.93904e-12	8.90542e-11		Potri.008G223200	3.74091	3.10059	2.74753	3.67877	2.4619e-05	0.000146571
Potri.011G032300	1.36602	-1.63102	-2.32637	0.0714384	1.94013e-12	8.90542e-11		Potri.010G126000	2.75806	1.97101	1.42785	1.82224	2.46714e-05	0.000146813
Potri.007G055100	1.77354	-0.350054	-1.15981	-0.430417	1.9494e-12	8.93325e-11		Potri.007G022300	7.51382	6.9909	5.74963	5.33289	2.5197e-05	0.000149557
Potri.013G083300	1.98264	0.91465	-1.5234	0.189354	2.00988e-12	9.18019e-11		Potri.001G042500	-2.03919	-1.90413	-1.65486	2.1897	2.52489e-05	0.000149833
Potri.014G069100	0.107603	-0.425913	2.1607	0.615637	2.78159e-12	1.25001e-10		Potri.004G085000	2.67661	2.79644	1.32312	2.05342	2.54215e-05	0.000150729
Potri.006G213500	3.23847	-0.566083	-2.45761	-3.34248	2.98605e-12	1.33329e-10		Potri.012G069700	3.99124	2.83851	3.06973	1.44631	2.56351e-05	0.000151865
Potri.016G036600	-0.888067	-0.165334	0.3295	2.21271	3.81708e-12	1.67219e-10		Potri.011G069500	-1.58853	-3.00602	-1.19454	1.09828	2.59729e-05	0.000153638
Potri.007G022100	-0.635232	-1.2202	1.58982	0.786681	4.14043e-12	1.80812e-10		Potri.011G051800	1.9007	2.37005	1.54742	1.49046	2.59887e-05	0.000153699
Potri.003G085000	-1.96438	0.0281634	1.76286	-0.11002	4.46636e-12	1.93835e-10		Potri.009G079000	-1.4432	-1.90375	-1.63338	-2.77176	2.61414e-05	0.000154503
Potri.018G088100	-1.95966	0.593989	3.2272	0.500753	4.53747e-12	1.96614e-10		Potri.009G089400	2.51318	2.18275	2.67816	2.13836	2.63733e-05	0.000155741
Potri.012G077000	-0.436831	-0.859313	2.1032	0.723473	5.6931e-12	2.44408e-10		Potri.T016800	3.27082	3.98208	2.9331	3.32409	2.65019e-05	0.000156401
Potri.009G130100	1.88222	0.0619484	-2.29499	-1.26081	5.99396e-12	2.5614e-10		Potri.018G087400	2.3638	2.67389	2.58817	4.05869	2.67303e-05	0.000157615
Potri.004G216900	-1.19825	-1.642	1.17308	-0.0200382	6.23193e-12	2.6509e-10		Potri.014G035700	2.47399	1.87273	2.06096	1.60446	2.75449e-05	0.0001618
Potri.003G138700	-3.913	-3.22389	-1.37645	1.53037	7.86876e-12	3.31177e-10		Potri.016G081200	-2.03901	-1.52292	-1.77618	-4.05865	2.77095e-05	0.000162664
Potri.005G174400	0.779318	-0.934081	2.49806	0.39388	8.40069e-12	3.51966e-10		Potri.005G170200	2.19259	3.01601	4.88797	3.29401	2.77909e-05	0.000163107
Potri.009G047700	-2.15601	-1.05201	1.00548	0.332349	8.74559e-12	3.65322e-10		Potri.010G128900	-1.50409	-1.68377	-1.5239	-2.17531	2.78026e-05	0.000163141
Potri.002G249900	-1.47755	1.02171	-1.27354	-4.35854	9.15373e-12	3.80658e-10		Potri.006G246700	-3.16863	-2.4503	-3.47341	-1.34412	2.8008e-05	0.000164139
Potri.004G035700	-0.0497571	-0.182213	3.31863	0.796347	9.62804e-12	3.98007e-10		Potri.018G130800	1.70796	1.62733	2.87137	2.38576	2.81285e-05	0.000164775
Potri.005G252300	-0.17617	1.62681	-1.50195	-0.537839	9.69408e-12	3.99551e-10		Potri.005G163700	3.18957	1.94218	1.96385	4.27178	2.8288e-05	0.000165605
Potri.012G133500	-3.61979	-1.98661	-3.51113	1.09556	9.7713e-12	4.02139e-10		Potri.006G120500	-4.74247	1.11783	-1.37854	-4.74247	2.84149e-05	0.000166278
Potri.019G131600	-0.389723	-1.99559	1.34252	-0.0214506	9.84319e-12	4.045e-10		Potri.001G462800	-2.87619	-1.8441	-1.96075	-1.64698	2.84702e-05	0.000166531
Potri.016G071600	0.239415	-0.0380121	2.8708	0.31515	1.2956e-11	5.22402e-10		Potri.001G242300	-1.1895	-1.19313	-3.26289	-1.58411	2.85162e-05	0.000166765
Potri.017G108500	2.20599	0.0730333	-1.37005	-0.432246	1.35798e-11	5.45973e-10		Potri.010G109000	4.10453	4.05814	3.55079	2.87379	2.87548e-05	0.000168035
Potri.012G060600	2.12234	-0.214605	0.663734	0.106555	1.42062e-11	5.69515e-10		Potri.004G026100	3.86987	2.69876	2.89496	2.62685	2.88384e-05	0.000168402
Potri.006G233800	-0.0299975	2.33273	-0.585319	0.61775	1.44476e-11	5.7836e-10		Potri.002G049400	-1.93492	1.04532	-1.00067	-2.68941	2.88663e-05	0.000168459
Potri.001G248100	0.734638	-1.11285	1.75106	0.562606	1.5277e-11	6.08067e-10		Potri.010G112600	2.92974	1.16952	2.9873	2.57765	2.90105e-05	0.000169185
Potri.001G295500	-1.67089	0.943225	3.37646	-0.00922954	1.74244e-11	6.86676e-10		Potri.018G076800	7.11918	6.20675	5.04982	5.87081	2.91598e-05	0.000169886
Potri.014G155100	0.682891	2.24043	-1.05008	0.375745	1.77876e-11	6.99009e-10		Potri.007G022000	-1.23665	-1.1627	-1.35095	1.10482	2.92478e-05	0.000170292
Potri.012G011700	-3.04082	-2.57625	1.36792	-0.580355	1.93115e-11	7.54639e-10		Potri.013G066100	2.60132	2.78747	3.52017	2.28942	2.93989e-05	0.000171135
Potri.015G128200	-0.264619	1.73503	-2.47358	-3.63714	2.05509e-11	7.99705e-10		Potri.013G114200	2.38744	2.64278	1.83891	1.46948	2.94915e-05	0.000171638
Potri.018G120400	0.199728	2.23367	-1.33734	0.257092	2.15971e-11	8.38076e-10		Potri.015G002800	3.64695	3.2828	2.48751	1.63748	2.95963e-05	0.00017214
Potri.006G054200	-0.5376	2.36294	-2.29549	-0.265034	2.27357e-11	8.7737e-10		Potri.014G037200	-1.58095	-1.22927	-1.60561	-1.89012	2.96851e-05	0.000172549
Potri.015G098900	2.42115	0.71968	0.0922189	0.28786	2.32783e-11	8.97067e-10		Potri.001G243300	2.80354	3.38724	1.8457	2.85804	2.97921e-05	0.000173134
Potri.003G006000	0.873621	3.77358	-0.268232	-3.70277	2.44431e-11	9.39355e-10		Potri.019G057600	-2.97328	-4.18485	-3.93752	-2.21005	3.00797e-05	0.000174696
Potri.010G151400	0.847002	-1.3742	1.9495	0.940618	2.53871e-11	9.72949e-10		Potri.003G164200	-1.16137	1.15635	-2.6583	-4.00132	3.02735e-05	0.000175711
Potri.001G243300	-1.26724	0.823482	2.69499	-0.856197	2.74066e-11	1.0446e-09		Potri.001G015300	-5.02683	-1.06858	-3.77744	-1.66289	3.05261e-05	0.000177087
Potri.002G071800	-0.293353	1.32635	-2.02334	-1.51636	2.82807e-11	1.07644e-09		Potri.007G115500	2.88794	1.4663	2.44804	2.60819	3.06805e-05	0.000177836
Potri.004G187200	-2.32873	-0.454231	4.57892	-2.32873	3.04196e-11	1.15156e-09		Potri.005G163600	2.31772	1.32629	1.54596	3.63791	3.07244e-05	0.000177994
Potri.001G168200	2.7551	0.269688	0.842008	0.159398	3.19486e-11	1.2078e-09		Potri.014G115700	-4.0342	-1.59753	-1.49904	1.53099	3.11824e-05	0.000180422
Potri.019G103500	2.15255	-0.68685	0.678379	0.994406	3.31388e-11	1.24941e-09		Potri.010G056400	3.25313	2.30741	1.71679	1.37478	3.14708e-05	0.000181863
Potri.009G111600	0.750489	-1.97408	1.27414	0.132463	3.61373e-11	1.35512e-09		Potri.008G048600	1.43739	2.17763	3.75014	4.23191	3.15915e-05	0.000182485
Potri.008G158200	0.50381	-2.0684	2.48944	0.932208	3.66675e-11	1.37316e-09		Potri.008G168400	3.00375	4.17948	4.0482	2.54496	3.18822e-05	0.000183935
Potri.008G161100	0.551861	-0.893104	1.84233	-0.944528	4.13701e-11	1.53278e-09		Potri.013G143200	-1.01785	-4.39378	-4.63122	-1.66544	3.19896e-05	0.000184469
Potri.009G096600	2.05231	0.0580556	-1.09065	0.488314	4.64217e-11	1.70409e-09		Potri.004G121000	-3.59456	-3.47085	-1.08112	-1.30504	3.20093e-05	0.000184484
Potri.013G109000	-1.32143	-2.30123	1.19156	0.208103	4.81393e-11	1.75787e-09		Potri.002G263600	1.96246	2.15944	2.42964	1.61581	3.20501e-05	0.000184597
Potri.005G172400	-0.994699	0.0658691	2.18609	0.0967043	5.09045e-11	1.85157e-09		Potri.006G156200	2.50025	2.20585	-1.08912	2.58591	3.27484e-05	0.000188229
Potri.013G051100	0	8.71379	0	0	5.36673e-11	1.94444e-09		Potri.003G203700	-5.44645	-5.44645	-5.44645	-3.01156	3.28914e-05	0.000188934
Potri.013G004100	1.94261	-0.725773	-0.210658	-0.519354	5.45022e-11	1.97213e-09		Potri.002G046700	-1.131	-2.36683	-2.35893	1.88136	3.35716e-05	0.000192525
Potri.004G143100	0.629904	3.55403	-2.46349	-2.42197	5.63162e-11	2.03512e-09		Potri.014G139600	2.62687	2.90585	3.09344	2.09503	3.37305e-05	0.000193272
Potri.013G136700	-0.254065	-1.29986	-1.91216	2.42767	5.98676e-11	2.15787e-09		Potri.005G096100	4.38675	3.07436	4.30957	6.69405	3.3737e-05	0.000193272
Potri.006G230800	2.23174	0.329752	0.669858	-1.2255	7.11511e-11	2.52858e-09		Potri.015G132900	-2.27128	-3.40098	-3.77128	-2.30994	3.41144e-05	0.000195232
Potri.019G028000	0.64142	-1.18994	-1.1221	3.27432	1.04467e-10	3.57136e-09		Potri.011G032100	-2.1936	-2.99335	-1.43909	-3.31737	3.43151e-05	0.000196304
Potri.007G099400	0.917859	0.6045	2.69374	0.801848	1.14538e-10	3.8823e-09		Potri.001G470700	-3.57875	-1.00929	1.82985	1.79404	3.44252e-05	0.000196849
Potri.012G036600	1.99552	-0.0651439	0.201932	-0.623413	1.22316e-10	4.11589e-09		Potri.001G232700	6.27981	4.00107	5.93877	3.8365	3.47375e-05	0.000198472
Potri.011G074600	-1.02652	-1.38686	-2.18217	2.09071	1.2314e-10	4.13366e-09		Potri.005G183500	-5.31912	-5.31912	-5.31912	-5.31912	3.47979e-05	0.000198775
Potri.004G052400	-2.53101	-1.05605	1.84602	0.0441625	1.24407e-10	4.16613e-09		Potri.012G119900	-1.94051	-2.36025	-1.7618	-2.4549	3.52992e-05	0.000201308
Potri.002G211100	0.513718	-0.342057	-0.878141	3.15594	1.3952e-10	4.62226e-09		Potri.005G259600	2.14932	1.83032	1.75764	1.63301	3.55772e-05	0.000202728
Potri.005G069500	0.735065	0.183337	2.81655	0.590327	1.51261e-10	4.99342e-09		Potri.004G214500	-2.66555	-5.59927	-5.59927	-5.59927	3.58018e-05	0.000203798
Potri.004G018000	0.784699	1.4845	-2.03147	0.35175	1.51912e-10	5.00897e-09		Potri.008G122100	4.32939	3.04197	4.90377	3.93224	3.58342e-05	0.000203941
Potri.015G044500	-1.06466	0.015371	-0.36341	2.81532	1.52226e-10	5.0134e-09		Potri.004G233200	1.90046	2.67284	2.29065	1.03133	3.64869e-05	0.000207316
Potri.006G218200	-1.21957	0.529298	3.74228	-0.995814	1.54528e-10	5.0712e-09		Potri.009G121900	-1.2699	-1.30162	-5.18941	-2.5071	3.66264e-05	0.000208023
Potri.003G035900	-1.54709	-1.78197	1.64065	0.459082	1.65062e-10	5.39151e-09		Potri.001G165700	-5.95262	-5.95262	-1.15045	-2.66082	3.67648e-05	0.000208725
Potri.003G207500	-0.812774	-1.66286	2.313	-0.798914	1.79761e-10	5.82383e-09		Potri.006G264900	-1.6273	-2.57073	-4.32887	-1.19722	3.68239e-05	0.000209017
Potri.017G032800	0.347006	-0.0380694	2.41197	0.0611032	1.90531e-10	6.16561e-09		Potri.011G121200	4.49708	3.7578	3.92758	2.37573	3.70513e-05	0.000210093
Potri.006G032300	-1.28961	-0.22229	1.33124	0.365528	2.01875e-10	6.49766e-09		Potri.001G189500	1.95149	2.00383	3.55776	3.22972	3.73549e-05	0.000211556
Potri.016G132200	1.86318	0.632687	-0.373261	-0.450101	2.02979e-10	6.52296e-09		Potri.012G134000	3.37019	2.75632	2.55383	3.67887	3.73642e-05	0.000211565
Potri.001G152300	-2.51493	-0.798819	1.08338	-0.0591777	2.06444e-10	6.61143e-09		Potri.005G060500	1.60799	1.74396	1.67001	2.33098	3.79298e-05	0.000214375
Potri.019G064300	0	6.28568	0	0	2.06818e-10	6.61581e-09		Potri.003G023200	2.64141	2.49947	1.69011	1.55687	3.81647e-05	0.000215615
Potri.006G086500	-1.30344	0.33181	1.39241	-0.0901698	2.13405e-10	6.80306e-09		Potri.T144600	3.46699	3.81603	3.10011	3.47317	3.82371e-05	0.00021598
Potri.003G070600	2.11933	-0.0352099	-0.0346742	0.812164	2.17004e-10	6.9099e-09		Potri.015G085300	2.07901	1.13178	2.55581	2.51122	3.8452e-05	0.000216974
Potri.007G066700	0.854794	-0.535763	-3.72625	3.8596	2.50245e-10	7.9321e-09		Potri.T037100	-3.76585	-5.87526	-5.87526	-2.04967	3.85088e-05	0.00021725
Potri.016G099300	-0.967501	-1.01782	1.45924	-0.339159	2.50782e-10	7.94009e-09		Potri.003G056200	-2.83802	-2.22348	-2.38026	-1.87309	3.90553e-05	0.000219939
Potri.002G013400	-1.56223	-0.898739	1.30398	0.908484	2.52084e-10	7.97228e-09		Potri.010G047100	-3.62769	-2.48603	-1.65162	-2.03067	3.92066e-05	0.00022056
Potri.001G383000	2.52953	-0.223508	0.615286	0.94728	2.74427e-10	8.62988e-09		Potri.004G188200	2.23472	1.33909	1.21914	2.93078	3.93372e-05	0.00022116
Potri.014G016300	1.12424	0.772036	-2.55065	0.506445	2.91673e-10	9.14127e-09		Potri.001G302400	2.14814	2.76366	3.59892	1.98132	3.96811e-05	0.000222913
Potri.010G031700	-0.794233	3.64863	0.039449	-2.0286	2.96208e-10	9.26256e-09		Potri.T097000	-1.45652	-2.91182	-2.95398	-3.23906	3.99867e-05	0.000224222
Potri.017G135600	0.215839	0.0870992	2.49047	0.0300265	3.14723e-10	9.78661e-09		Potri.007G052300	-3.18627	-2.18809	-1.0658	-2.05678	4.01117e-05	0.000224787
Potri.014G147900	-0.0716981	1.38571	-1.77496	-0.625047	3.23536e-10	1.00271e-08		Potri.002G118200	5.55287	6.61414	5.38938	4.21878	4.01264e-05	0.00022479
Potri.005G056800	-1.65073	-0.108264	2.34499	-0.355301	3.27803e-10	1.01481e-08		Potri.015G048700	2.4585	2.08221	1.03327	1.53075	4.02121e-05	0.000225168
Potri.003G024000	2.59664	0.887012	0.757382	0.695392	3.3619e-10	1.03846e-08		Potri.007G132500	-2.28907	-4.16404	-3.90666	-6.40377	4.02671e-05	0.000225385
Potri.019G093900	-0.618919	1.76484	-0.823025	-9.70811	3.49366e-10	1.07677e-08		Potri.007G053800	3.30118	2.16727	3.13413	1.96391	4.08746e-05	0.000228418
Potri.008G107900	2.04583	-0.218906	0.165237	0.0839681	3.55855e-10	1.09435e-08		Potri.006G007200	2.82914	1.43379	2.19092	2.21354	4.09941e-05	0.000228948
Potri.007G084700	-1.57759	-1.81361	-1.93082	1.02804	3.93287e-10	1.20283e-08		Potri.003G017700	1.54261	1.45867	-3.79178	2.89153	4.11313e-05	0.000229618
Potri.001G404600	-1.54835	-1.72848	1.13063	0.111621	3.98928e-10	1.21741e-08		Potri.004G189200	2.21905	2.30098	-3.23506	-3.23506	4.1343e-05	0.000230664
Potri.005G241100	1.87274	-0.292648	0.00276675	0.367699	4.16821e-10	1.26646e-08		Potri.004G024300	3.27163	2.50266	3.28	1.56713	4.26894e-05	0.000236987
Potri.009G114700	-1.74565	3.97466	-0.292754	-1.9207	4.25909e-10	1.29126e-08		Potri.005G133100	5.66824	5.06415	4.54019	6.197	4.303e-05	0.000238687
Potri.010G220600	-2.04776	-1.48022	1.04671	0.622455	4.27975e-10	1.29611e-08		Potri.019G031400	3.99301	2.33502	4.12259	2.12385	4.30872e-05	0.000238957
Potri.013G073900	-0.870268	-2.282	1.08018	0.319798	4.34704e-10	1.31364e-08		Potri.001G155700	-2.47485	-1.45082	-1.71824	-1.60483	4.37232e-05	0.000242098
Potri.002G177900	-0.702525	-1.0924	1.53782	0.0227154	4.39058e-10	1.32392e-08		Potri.003G057900	-2.57027	-3.87295	-1.89518	-2.17085	4.38453e-05	0.000242725
Potri.010G228600	0.432149	-0.970442	1.64	-0.367244	4.67614e-10	1.40093e-08		Potri.014G175100	5.97268	5.39346	2.49252	6.16976	4.44747e-05	0.00024572
Potri.010G042300	-1.90446	-1.56763	1.19391	0.754958	5.28068e-10	1.56855e-08		Potri.009G028300	6.12697	5.51358	7.05398	5.85601	4.49283e-05	0.00024798
Potri.007G065400	-4.0524	-1.3149	1.46889	-1.42847	5.7219e-10	1.69362e-08		Potri.012G021600	3.17087	3.88824	2.95566	3.76544	4.50949e-05	0.00024884
Potri.006G109600	1.84803	-0.0579022	0.135219	-0.0492954	5.77636e-10	1.70669e-08		Potri.004G005600	-2.3541	-5.80282	-5.80282	-1.0248	4.52338e-05	0.000249468
Potri.019G128200	-4.41092	3.03639	-1.00788	-4.41092	5.87025e-10	1.73076e-08		Potri.012G097000	2.76818	1.83006	2.85879	1.09225	4.53248e-05	0.000249871
Potri.008G025900	2.32005	0.522205	0.395234	-0.0857999	5.93184e-10	1.74707e-08		Potri.001G295500	2.85671	3.62221	2.09663	3.50989	4.54246e-05	0.000250322
Potri.003G167800	-0.34306	-1.63791	1.59013	-0.277788	6.45394e-10	1.88293e-08		Potri.T007900	2.74428	2.13684	1.21719	2.67529	4.56063e-05	0.000251223
Potri.017G089800	2.07787	-0.146597	0.715357	0.265944	6.57255e-10	1.91353e-08		Potri.009G119900	3.27276	-2.3836	-2.3836	1.8434	4.62327e-05	0.00025412
Potri.016G137300	2.28889	0.577556	0.73943	0.430816	7.62265e-10	2.20085e-08		Potri.013G026400	-2.46419	-1.20144	-1.0369	-1.18405	4.63492e-05	0.00025466
Potri.017G108300	0.281327	-3.02362	1.77271	-0.110949	7.64049e-10	2.20372e-08		Potri.001G058600	1.18119	2.4872	2.59464	2.55497	4.6751e-05	0.000256563
Potri.018G114200	-0.531887	0.385404	2.56149	-0.418571	7.71585e-10	2.22316e-08		Potri.T180400	3.8146	3.37764	1.51564	3.19608	4.76397e-05	0.000260565
Potri.002G106300	0.529923	0.232329	2.53707	0.612966	8.20527e-10	2.34718e-08		Potri.005G086400	5.92884	6.60931	4.8708	6.68659	4.7801e-05	0.000261396
Potri.008G038300	0.326807	-0.841467	2.07356	0.665756	8.42073e-10	2.40142e-08		Potri.017G135000	1.86146	2.23374	1.78753	2.89066	4.80088e-05	0.000262326
Potri.002G165800	0.246516	1.02043	-2.54647	-2.49915	1.05174e-09	2.95995e-08		Potri.008G086800	-3.53081	1.2064	-2.14212	-1.10023	4.80914e-05	0.000262726
Potri.009G117200	0.89971	-1.46799	1.71644	0.68381	1.29672e-09	3.59853e-08		Potri.016G015700	2.51399	2.7831	2.57463	3.0955	4.8654e-05	0.000265278
Potri.006G097600	2.03595	0.860379	-0.0946519	0.0761301	1.49194e-09	4.11162e-08		Potri.011G123600	2.3519	4.00664	2.60522	3.51994	4.86733e-05	0.000265331
Potri.001G225100	1.67547	0.764347	-0.753457	-0.117226	1.59577e-09	4.38042e-08		Potri.005G198900	-1.56284	-1.88276	-2.35428	-2.12268	4.8766e-05	0.000265705
Potri.017G084600	-0.580821	-1.25518	1.24498	0.537962	1.65542e-09	4.53523e-08		Potri.009G061400	-4.17505	1.21339	-4.17505	-4.17505	4.87689e-05	0.000265705
Potri.005G115300	-1.27458	2.09997	-0.611538	-0.369843	1.67619e-09	4.57863e-08		Potri.013G120200	-1.72763	-2.04208	-1.79137	-2.82348	4.87705e-05	0.000265705
Potri.002G007300	-4.22408	1.82549	-1.87451	-4.90981	1.70787e-09	4.65148e-08		Potri.001G029700	6.7311	5.37784	6.74742	4.777	4.89152e-05	0.000266336
Potri.002G034500	-2.8729	1.96956	-2.04748	-1.36173	1.84151e-09	4.99593e-08		Potri.003G075500	-4.501	-4.501	-4.501	1.00614	4.8965e-05	0.000266555
Potri.013G115900	-0.365963	3.93766	-4.91362	-4.91362	1.95386e-09	5.28529e-08		Potri.005G132300	5.33898	3.61145	4.60964	6.48327	4.99038e-05	0.000271082
Potri.003G173900	1.53901	-0.434637	-0.921433	0.118005	1.97443e-09	5.33575e-08		Potri.019G131300	3.22655	1.52502	2.53912	1.05163	5.04204e-05	0.000273354
Potri.006G092300	0.824722	0.778203	2.69676	0.497459	1.99934e-09	5.39782e-08		Potri.016G118600	-1.83418	-5.47922	-2.92553	-3.87418	5.07328e-05	0.000274779
Potri.001G082600	-0.147517	2.46529	0.32701	-4.65062	2.04355e-09	5.50119e-08		Potri.003G007900	-2.37812	-2.37812	3.4981	2.8152	5.10429e-05	0.00027619
Potri.016G103300	1.79001	0.197963	-1.16699	0.719072	2.30077e-09	6.14023e-08		Potri.002G004700	2.14535	-3.78201	-1.29094	1.71217	5.15158e-05	0.000278424
Potri.013G154100	1.99579	-0.22654	-0.224629	-5.2342	2.40154e-09	6.37861e-08		Potri.012G040000	-5.47097	-5.47097	-5.47097	-3.03233	5.19882e-05	0.000280704
Potri.014G172800	-1.39568	-1.43788	1.292	0.557116	2.48802e-09	6.59574e-08		Potri.010G182200	1.55159	2.15948	1.83294	2.05791	5.20264e-05	0.000280801
Potri.T074600	0.838226	-1.12166	-0.456195	3.84189	2.54792e-09	6.74812e-08		Potri.001G113600	2.2327	1.5697	1.60058	2.07566	5.2047e-05	0.000280858
Potri.009G147900	0.384085	0.558337	5.17003	-0.0625652	2.55383e-09	6.75734e-08		Potri.010G080800	-2.38139	-2.38139	3.12897	-2.38139	5.22141e-05	0.000281596
Potri.019G008300	-5.19429	3.08716	-1.93124	-8.48106	2.78497e-09	7.32028e-08		Potri.003G132000	-1.80114	1.15155	-3.35457	-3.08014	5.32881e-05	0.000286831
Potri.012G126100	-0.66271	-1.62142	1.14927	-0.747295	2.83335e-09	7.43341e-08		Potri.002G142800	3.23554	2.99347	4.64353	3.74045	5.3738e-05	0.000288806
Potri.T137400	-0.318248	2.30563	0.346067	0.128312	2.8923e-09	7.57382e-08		Potri.006G255800	-1.90811	-2.13498	-1.62026	-1.19958	5.3856e-05	0.000289328
Potri.006G022500	1.71084	-0.862993	0.918796	-0.200872	3.07265e-09	8.00843e-08		Potri.001G366200	1.93199	2.8466	1.74075	1.71599	5.40398e-05	0.000290259
Potri.009G063900	0.685713	0.334032	2.28001	0.0889787	3.09937e-09	8.05547e-08		Potri.008G148000	1.30665	2.24122	1.72217	1.3767	5.41229e-05	0.000290649
Potri.002G144900	3.76276	0.562877	-0.301726	-1.15531	3.18811e-09	8.27069e-08		Potri.018G069100	1.15415	2.99282	1.54061	1.22346	5.47191e-05	0.000293511
Potri.016G109400	-0.927434	-1.50361	1.24411	0.782178	3.43679e-09	8.85779e-08		Potri.002G145500	6.05897	6.89202	6.73971	5.61798	5.49021e-05	0.000294265
Potri.014G160000	2.09142	0.511691	-0.0611088	0.651489	3.43986e-09	8.85779e-08		Potri.012G065100	1.42723	1.64684	1.48641	2.52084	5.53268e-05	0.000296141
Potri.003G052000	0.338618	2.88823	0.611129	0.562018	3.81572e-09	9.75355e-08		Potri.003G199800	3.74411	2.88067	-2.39318	2.95155	5.54451e-05	0.000296718
Potri.008G203400	-1.46103	-0.0259678	0.442169	1.47354	4.0654e-09	1.03066e-07		Potri.018G132200	-4.8825	-1.95222	-3.45177	-1.94044	5.55091e-05	0.000297003
Potri.T159900	1.24443	-0.411101	-1.32537	0.269399	4.17796e-09	1.05553e-07		Potri.001G303700	3.52175	2.61873	3.8464	2.90424	5.55664e-05	0.000297252
Potri.015G023500	0.27938	1.46576	-0.584631	-1.42327	4.17862e-09	1.05553e-07		Potri.012G086300	-4.95672	-2.13654	-4.55467	-2.05164	5.58097e-05	0.00029844
Potri.001G372100	0.745377	-1.48326	1.07684	0.560242	4.20176e-09	1.05895e-07		Potri.019G073300	4.61448	2.39583	3.73894	2.96512	5.59956e-05	0.000299261
Potri.012G034100	-0.280421	1.41808	-1.32202	-0.317033	4.32181e-09	1.08481e-07		Potri.001G225800	3.6833	3.68647	3.14751	2.73619	5.71118e-05	0.000304406
Potri.006G019000	0.77937	1.2733	-2.12547	-0.586555	4.38076e-09	1.09763e-07		Potri.012G132900	-3.82204	-3.82204	2.23168	3.39862	5.76722e-05	0.000307099
Potri.017G149000	-2.9351	1.46856	-1.30368	0.172293	4.41671e-09	1.10565e-07		Potri.010G122200	-1.79789	-1.56857	-1.56227	-1.60585	5.77659e-05	0.00030748
Potri.016G103500	2.31561	-0.318626	0.702169	0.668848	4.89525e-09	1.21887e-07		Potri.014G110600	-1.11371	-1.62521	-2.81909	-1.07745	5.82048e-05	0.000309697
Potri.003G180500	-0.40859	2.23491	0.0391633	0.131186	5.007e-09	1.24336e-07		Potri.010G016800	-1.89134	-2.25665	-6.82869	-1.33478	5.94597e-05	0.00031577
Potri.019G054500	2.14484	0.427387	0.00161475	0.414937	5.24108e-09	1.29342e-07		Potri.013G126000	-1.59499	-2.36215	-2.5399	-1.21523	5.966e-05	0.000316713
Potri.001G304000	1.76544	0.117056	-0.453086	0.344604	5.24695e-09	1.29372e-07		Potri.003G188800	-2.82781	-1.30577	-1.05768	1.21728	6.08271e-05	0.000322109
Potri.015G108600	0.590347	-1.35431	1.26773	0.283799	5.49834e-09	1.35212e-07		Potri.008G068500	1.97972	3.16375	2.83818	3.70756	6.19613e-05	0.000327429
Potri.003G018800	-0.464565	-1.07442	1.33912	0.0918485	5.66958e-09	1.39177e-07		Potri.014G024600	-4.02154	-3.05251	-6.12996	-1.90179	6.27376e-05	0.000331216
Potri.004G162600	-1.4492	-2.0447	1.53452	0.0917754	5.70707e-09	1.39851e-07		Potri.018G090200	-2.10209	-1.27971	1.69733	2.65978	6.33692e-05	0.000334233
Potri.015G082400	-0.122536	2.16761	-0.382838	-0.26056	6.0698e-09	1.477e-07		Potri.003G134800	6.73675	5.40603	5.65613	4.52027	6.34319e-05	0.000334501
Potri.006G221400	0.0328592	2.39832	-2.2011	-1.6601	6.82209e-09	1.64569e-07		Potri.013G125500	-1.36447	-1.88422	-3.08963	-1.09482	6.37676e-05	0.000336095
Potri.015G068200	-0.0422171	2.20527	-2.528	0.986698	7.09063e-09	1.70604e-07		Potri.002G198800	2.96473	1.92039	1.93391	4.96021	6.40489e-05	0.00033737
Potri.003G157900	0.2984	0.82	0.83476	2.87858	7.21597e-09	1.72873e-07		Potri.002G228400	4.36981	2.99937	2.20671	3.39141	6.43846e-05	0.000338882
Potri.003G006200	-1.75941	-0.879261	1.56702	0.12293	7.92403e-09	1.88539e-07		Potri.016G073500	-1.77035	-1.32369	-2.24975	-1.44091	6.45709e-05	0.000339733
Potri.002G006100	-0.594763	-1.79921	1.09583	0.010984	8.0291e-09	1.90713e-07		Potri.014G138200	-1.23146	-1.01262	-1.95806	-1.21512	6.49331e-05	0.000341445
Potri.004G144400	-5.86118	1.10131	-1.49489	-5.86118	8.05302e-09	1.91119e-07		Potri.013G036500	-1.65392	-2.41261	-2.8477	-1.35052	6.52479e-05	0.000342841
Potri.009G070400	1.96093	0.320944	-0.42319	-0.265401	8.31659e-09	1.9701e-07		Potri.003G080400	-2.88171	-1.88074	-2.51363	-1.28431	6.56214e-05	0.000344608
Potri.004G010100	0.983961	1.64321	-1.94534	-8.24023	8.52625e-09	2.01662e-07		Potri.016G036000	-1.51566	-1.41403	-1.95634	-1.73499	6.60719e-05	0.000346843
Potri.012G102400	-2.41554	1.44015	-1.17269	-0.797153	8.65994e-09	2.04304e-07		Potri.008G160500	-1.66701	-2.93171	-1.97894	-3.67012	6.63847e-05	0.00034842
Potri.013G152300	0.903179	0.816084	2.85254	-0.991647	8.72837e-09	2.05744e-07		Potri.010G063500	1.76104	2.66043	1.50526	1.75678	6.64675e-05	0.000348788
Potri.019G103400	2.03222	0.409404	-0.575767	0.325992	9.21073e-09	2.16382e-07		Potri.013G045200	3.84916	2.25767	2.49738	6.31329	6.68855e-05	0.000350783
Potri.013G069600	2.41283	0.61119	0.887346	0.579392	9.37021e-09	2.19943e-07		Potri.004G193900	1.18859	-1.86189	-2.45204	1.46244	6.70071e-05	0.000351354
Potri.001G158000	0.402056	1.61278	-1.27047	0.552493	9.8473e-09	2.29403e-07		Potri.005G049700	-1.2374	1.01364	2.83004	2.70614	6.7143e-05	0.000351828
Potri.010G065700	3.09558	0.430001	0.832733	0.460356	9.96648e-09	2.31985e-07		Potri.001G187400	6.75222	6.53925	6.28859	7.67583	6.72425e-05	0.000352257
Potri.017G126200	-0.0227523	-0.0830858	2.07876	-0.227921	1.12821e-08	2.58717e-07		Potri.011G163500	3.80636	4.56774	5.08856	6.92524	6.77576e-05	0.000354487
Potri.016G031300	-1.15644	0.879551	2.75399	0.359012	1.14656e-08	2.62493e-07		Potri.006G060700	3.16224	3.19336	2.16269	1.70109	6.78668e-05	0.000354925
Potri.001G255500	0.0201079	3.13471	0.543043	-1.81078	1.16917e-08	2.66794e-07		Potri.009G063900	1.52382	1.28305	1.41871	2.0516	6.80933e-05	0.000355908
Potri.001G407000	-0.560057	-0.625802	1.39334	0.259919	1.18031e-08	2.68708e-07		Potri.016G098200	1.17481	1.41762	2.08651	2.91838	6.8197e-05	0.000356317
Potri.003G061600	-0.391407	1.10763	-3.37335	-1.49207	1.18843e-08	2.70303e-07		Potri.002G219700	-3.53349	-3.40669	-1.72638	1.16622	6.85381e-05	0.000357964
Potri.T114300	-2.50661	-0.102885	-0.997032	1.39513	1.25735e-08	2.84122e-07		Potri.003G108200	2.54637	2.78024	2.18493	1.58223	6.87604e-05	0.000358788
Potri.005G127200	-0.779911	-1.19592	1.35626	0.283614	1.31034e-08	2.95378e-07		Potri.007G059800	-1.19558	-1.05972	1.41158	2.56497	6.9638e-05	0.000362686
Potri.001G409900	2.40906	0.59033	-1.81388	0.421892	1.35863e-08	3.06015e-07		Potri.014G100800	2.87752	1.49803	1.18857	1.2587	7.00297e-05	0.00036459
Potri.014G081700	0.922679	-0.647945	1.65562	0.652648	1.40936e-08	3.15148e-07		Potri.006G139400	2.07082	2.10942	1.3672	1.76373	7.00824e-05	0.00036466
Potri.005G112700	2.41713	0.48525	0.705175	-0.0693222	1.42891e-08	3.1901e-07		Potri.017G011700	-2.37622	-2.37622	2.2567	3.71389	7.02016e-05	0.000365143
Potri.008G202800	0.0651385	2.43387	0.161252	-1.76441	1.50095e-08	3.32693e-07		Potri.004G074000	1.07857	1.13761	2.2601	3.88435	7.03919e-05	0.00036579
Potri.002G212700	2.09044	0.801049	0.0424616	0.178721	1.53534e-08	3.39236e-07		Potri.004G034400	2.27818	2.46464	1.07169	3.51584	7.04673e-05	0.000366114
Potri.010G151700	0.841588	-1.28595	2.08059	0.727694	1.59866e-08	3.51277e-07		Potri.T168400	3.17526	3.69787	2.35645	1.99347	7.06678e-05	0.000367018
Potri.005G189800	-0.771876	-1.67463	1.6818	0.588294	1.75883e-08	3.83446e-07		Potri.001G339000	-2.94389	-3.08645	-2.12199	-2.62783	7.09346e-05	0.00036806
Potri.013G039100	0.125006	1.51008	-0.457118	-3.30591	1.88446e-08	4.08917e-07		Potri.013G047700	-2.39656	-2.39656	1.5143	3.36964	7.10235e-05	0.000368453
Potri.005G071300	-1.17025	-1.70507	1.67929	0.715469	1.96244e-08	4.23267e-07		Potri.001G178600	-2.50793	-5.44006	-5.44006	-5.44006	7.22091e-05	0.000373844
Potri.013G006600	-1.15111	-0.37472	1.41998	0.231032	1.97254e-08	4.2505e-07		Potri.010G051300	3.18295	1.23799	-2.38259	3.69868	7.23396e-05	0.00037411
Potri.008G204200	-0.398271	-1.52572	1.52345	0.194962	1.98033e-08	4.26399e-07		Potri.008G181600	-3.23314	-3.23314	1.6366	2.39885	7.23429e-05	0.00037411
Potri.004G164400	1.34722	-0.357643	-0.413562	-4.74759	2.17514e-08	4.65109e-07		Potri.015G086900	-1.17391	-1.06175	2.82253	4.04953	7.259e-05	0.000375109
Potri.001G154300	2.42609	0.463635	0.880696	0.834235	2.21985e-08	4.73942e-07		Potri.015G104400	3.82296	2.42049	2.97543	1.82475	7.3754e-05	0.000380205
Potri.019G028300	-0.453058	-1.11125	-1.4665	1.82859	2.34801e-08	4.98629e-07		Potri.012G126500	-2.80979	-2.64264	-2.37375	1.62455	7.40992e-05	0.000381429
Potri.006G221000	-0.408745	-0.618665	2.11463	0.791739	2.38043e-08	5.03979e-07		Potri.016G011100	-1.57069	-1.89512	-2.34837	-1.22376	7.41011e-05	0.000381429
Potri.018G026900	0.719785	-0.537063	1.69729	0.16014	2.45919e-08	5.18682e-07		Potri.002G039000	1.22414	1.31397	2.92978	1.65452	7.45736e-05	0.000383648
Potri.005G075400	0.150118	-1.907	1.06624	-0.0359254	2.77695e-08	5.81739e-07		Potri.016G046000	4.12573	4.31674	6.54233	4.77244	7.51799e-05	0.000386552
Potri.013G061200	-0.846436	-0.414262	1.2876	0.573669	2.96066e-08	6.17893e-07		Potri.014G077200	-2.74499	-1.68515	-1.26691	-1.27297	7.52301e-05	0.000386739
Potri.005G095500	-2.05452	0.231478	-2.84185	2.27036	2.96284e-08	6.17893e-07		Potri.001G107800	1.24091	1.65406	2.12097	2.90715	7.5495e-05	0.000387885
Potri.005G194500	1.54827	0.0809482	-1.4781	0.74992	3.01539e-08	6.27913e-07		Potri.006G111100	4.10185	2.70788	3.63225	3.25137	7.73345e-05	0.000396457
Potri.009G053300	-0.454077	-1.37036	1.15722	0.540043	3.04976e-08	6.34123e-07		Potri.010G049000	3.4292	3.07325	6.07089	6.16463	7.75631e-05	0.000397482
Potri.019G008700	-4.37852	3.09266	0.329727	-4.37852	3.08862e-08	6.41246e-07		Potri.011G136100	-1.10662	-2.40811	-2.58796	-1.52277	7.85572e-05	0.000401984
Potri.001G178300	0.0395649	-1.71675	1.66442	0.151212	3.14021e-08	6.50986e-07		Potri.018G082800	3.84956	4.61944	2.32213	2.72589	7.85927e-05	0.000402091
Potri.006G251800	0.696026	1.37879	-1.52078	-0.626978	3.18625e-08	6.6004e-07		Potri.008G194000	-1.35179	-1.64948	-1.69211	-1.33386	7.87312e-05	0.000402526
Potri.009G033300	-1.25136	0.22306	1.51078	-0.25335	3.29804e-08	6.80666e-07		Potri.012G003400	2.94993	2.04858	3.53912	3.42708	7.88142e-05	0.000402854
Potri.011G107900	1.6798	-0.291205	-0.207097	0.638166	3.38235e-08	6.96005e-07		Potri.015G054300	1.87442	1.83789	1.76214	1.80205	7.95832e-05	0.000406411
Potri.006G274700	-1.26431	-1.33122	1.36253	0.511264	3.46872e-08	7.13252e-07		Potri.002G234200	5.40461	4.64192	3.60198	4.65968	8.09503e-05	0.000412786
Potri.019G095300	2.8717	0.992199	0.0471122	-0.788738	3.61296e-08	7.39092e-07		Potri.001G082900	1.35564	1.07023	1.97219	1.29758	8.10316e-05	0.000413124
Potri.015G046700	2.51198	0.590324	0.300405	0.159467	3.73387e-08	7.61589e-07		Potri.015G099700	-1.88321	-1.92264	-2.82461	-1.01404	8.21933e-05	0.000418433
Potri.010G189500	1.22432	0.374998	-1.33865	-0.630303	3.78839e-08	7.72145e-07		Potri.001G221400	2.93224	4.54208	4.28854	6.24943	8.28339e-05	0.000421258
Potri.012G016400	-2.46485	-1.49913	1.10785	-0.279134	4.25746e-08	8.60198e-07		Potri.010G220500	2.94068	1.41905	2.60706	1.88478	8.39066e-05	0.000425985
Potri.005G163600	0.814737	0.709327	2.61285	-1.8879	4.3518e-08	8.78623e-07		Potri.014G133700	-1.2232	-4.13297	-4.13297	2.09573	8.41203e-05	0.000426836
Potri.007G097800	-0.167114	2.79791	-0.0846261	-4.41606	4.35724e-08	8.79083e-07		Potri.012G127000	3.05682	2.41837	1.73859	2.25494	8.41452e-05	0.000426884
Potri.008G102600	-0.656303	-1.28219	2.52614	-0.952663	4.40812e-08	8.88706e-07		Potri.017G067000	-3.75907	-1.51737	-3.75907	2.00699	8.47046e-05	0.00042933
Potri.009G150600	2.73215	0.961567	0.833295	0.832468	4.46816e-08	8.99507e-07		Potri.003G099000	-4.69869	-4.18116	-2.42113	-2.75967	8.5375e-05	0.000432571
Potri.003G185000	-0.2073	-0.77617	1.99516	0.874642	4.61851e-08	9.27764e-07		Potri.018G099800	1.5725	2.2851	1.05034	2.19687	8.55912e-05	0.000433508
Potri.018G114700	-0.630666	-1.14808	1.22832	0.246283	4.64816e-08	9.32124e-07		Potri.001G352100	1.17243	1.51146	2.9753	1.39008	8.64497e-05	0.000436858
Potri.001G208000	-1.78214	1.61318	-0.426805	0.314272	4.71848e-08	9.45122e-07		Potri.012G057900	-1.11209	-2.83892	-2.37025	-1.77233	8.73111e-05	0.000440294
Potri.004G054100	0.300847	1.62555	-0.96727	-1.68147	4.88954e-08	9.7448e-07		Potri.010G135800	-1.62519	-6.57914	-2.27759	-1.08521	8.73867e-05	0.000440515
Potri.001G275200	1.93696	0.670605	0.447201	-0.168742	4.9047e-08	9.76804e-07		Potri.001G450000	1.32493	2.30697	1.3216	2.38407	8.92014e-05	0.00044893
Potri.001G278500	-0.0522179	0.570628	1.87635	-0.303923	5.24974e-08	1.03884e-06		Potri.003G171700	-2.58871	-4.7295	-4.4677	-3.14442	9.08405e-05	0.000456507
Potri.003G080600	-2.78171	-1.39903	1.77504	-5.23631	5.28796e-08	1.04492e-06		Potri.002G046900	3.00642	2.10977	1.90043	1.87401	9.12594e-05	0.000458375
Potri.T005700	0.169968	-2.00991	-2.27124	2.11795	5.41236e-08	1.06415e-06		Potri.006G273900	-3.49089	-5.59893	-5.59893	-3.16437	9.19352e-05	0.000461436
Potri.008G192000	0.49134	0.697691	2.29757	-0.104283	5.47125e-08	1.07277e-06		Potri.006G261800	-5.14088	-5.14088	-5.14088	-5.14088	9.21109e-05	0.000462151
Potri.002G104700	0.429158	1.10352	-1.71729	0.896256	5.88411e-08	1.14887e-06		Potri.006G010300	6.31962	5.41798	3.36312	4.52062	9.22162e-05	0.000462512
Potri.001G016300	0.0297203	1.76073	0.498916	-1.15077	5.88881e-08	1.14898e-06		Potri.004G180500	-2.49542	-1.00191	-1.54069	1.67738	9.2255e-05	0.000462623
Potri.008G087500	-0.391193	2.55462	-2.08292	-1.204	5.93435e-08	1.15624e-06		Potri.001G385900	-1.50341	-1.6903	-2.85665	-2.53109	9.40339e-05	0.000470525
Potri.015G086800	-0.244544	0.211624	1.97821	0.229148	6.25639e-08	1.21644e-06		Potri.004G090800	-1.07361	-2.36384	-2.12215	-1.07464	9.42654e-05	0.000471598
Potri.013G159000	-0.349582	-1.31111	1.18345	0.265986	6.30737e-08	1.22532e-06		Potri.009G127100	-3.22789	-3.22789	1.39581	2.65355	9.56422e-05	0.000477799
Potri.006G166700	-1.872	-0.692445	1.13233	-0.421012	7.19668e-08	1.38668e-06		Potri.010G077000	6.05658	3.61924	5.2419	3.29668	9.56669e-05	0.000477836
Potri.019G029500	-1.15028	-1.02195	1.19197	-0.110934	7.43911e-08	1.43042e-06		Potri.003G124200	-1.2328	-1.12625	-1.91316	-1.33409	9.74718e-05	0.000485891
Potri.009G041700	0.24759	-0.940009	1.37005	0.601586	7.53326e-08	1.44753e-06		Potri.003G021000	-1.88548	-1.0102	-1.3734	-1.30723	9.80862e-05	0.000488866
Potri.018G087100	2.55078	-0.689213	0.660338	0.179606	7.94731e-08	1.5208e-06		Potri.018G021900	-1.81339	-1.96679	-1.18597	1.19202	9.8513e-05	0.000490905
Potri.010G187800	1.02117	-0.854845	-0.769857	-2.0525	8.16561e-08	1.56043e-06		Potri.008G071000	2.66823	3.50654	2.53053	1.22782	9.88563e-05	0.000492527
Potri.T131700	-0.955483	0.606132	-1.40347	1.94286	8.23111e-08	1.57187e-06		Potri.014G113200	3.25447	1.8383	1.94084	2.05354	9.98524e-05	0.000496867
Potri.018G070600	1.79955	0.712586	-0.86099	0.578479	8.41724e-08	1.60192e-06		Potri.012G056800	4.9724	4.1333	4.8615	3.48689	0.000100011	0.000497477
Potri.002G117600	-2.62439	-2.34617	1.97077	-1.30615	8.50288e-08	1.61491e-06		Potri.016G038600	-2.09508	-2.00269	-2.29091	-1.8869	0.00010035	0.000498806
Potri.001G054800	-0.576534	-0.792609	-2.12377	1.594	8.51364e-08	1.61585e-06		Potri.002G156300	-1.13884	-2.36971	-1.89227	-1.67079	0.000100603	0.000499886
Potri.001G275500	0.614546	1.80523	-3.78751	-4.44989	8.65751e-08	1.64092e-06		Potri.016G129100	3.46751	4.1754	4.42775	4.54473	0.000100796	0.000500667
Potri.016G037200	-1.28824	0.686566	0.358937	1.70636	8.7035e-08	1.64584e-06		Potri.018G112900	2.67823	3.02071	2.32061	3.74972	0.000101337	0.000503171
Potri.002G093400	1.95444	0.523314	0.452124	0.0402955	8.71299e-08	1.64584e-06		Potri.016G024900	-2.24811	-1.09853	-1.5686	-1.0154	0.000101394	0.000503369
Potri.012G022600	-0.697961	1.20717	-1.04175	-0.227274	9.29993e-08	1.74605e-06		Potri.019G045400	-1.70599	-6.28859	-2.92683	-1.29214	0.000104007	0.000515143
Potri.010G173600	1.89159	0.500852	-0.256117	0.82048	9.55764e-08	1.78842e-06		Potri.T102600	-1.90783	-4.07085	-2.97819	-6.31146	0.000104268	0.000516249
Potri.003G121000	-1.75951	0.664419	2.19024	-1.8579	9.7324e-08	1.81745e-06		Potri.011G006600	-5.15011	-5.15011	-5.15011	-5.15011	0.000104376	0.000516694
Potri.018G015700	0.650225	-1.07417	1.40153	0.557959	9.8498e-08	1.83579e-06		Potri.001G011000	1.42103	1.46393	2.21743	2.24626	0.000104525	0.000517338
Potri.004G179100	1.90939	-1.39236	0.0500152	-1.46588	9.89738e-08	1.84209e-06		Potri.002G129800	-1.22892	-4.14532	-1.65207	1.9343	0.000105083	0.000519917
Potri.004G203700	2.06371	0.885663	0.248455	0.277314	1.00222e-07	1.86283e-06		Potri.018G119700	2.64356	1.93392	1.05501	2.40271	0.000105467	0.000521353
Potri.005G136200	-0.142657	-0.641825	2.0022	0.564833	1.00691e-07	1.87029e-06		Potri.014G186000	3.53869	3.67903	3.50096	4.84667	0.00010561	0.000521875
Potri.019G126800	1.85677	0.81682	-1.58194	-4.22982	1.02924e-07	1.91051e-06		Potri.010G205700	2.04836	1.71884	1.04948	1.79029	0.000106472	0.000525769
Potri.008G117100	0.0703651	0.565055	1.64921	-1.10744	1.05722e-07	1.95984e-06		Potri.005G088400	-3.75681	-3.75681	-3.75681	1.75381	0.000108135	0.000532631
Potri.003G072800	1.69882	0.544417	-0.889487	-0.963717	1.11514e-07	2.05761e-06		Potri.T071100	1.4733	1.36807	-5.54542	1.36744	0.00011054	0.000542663
Potri.001G293100	2.07628	0.363953	0.917264	0.381944	1.14047e-07	2.0988e-06		Potri.006G224100	2.22426	3.31194	1.93661	1.16927	0.000111867	0.000548405
Potri.001G049000	1.9133	-1.09849	-1.36509	0.84342	1.17351e-07	2.15249e-06		Potri.002G155300	2.99868	4.16092	3.39058	3.41562	0.000112865	0.000552516
Potri.003G132200	0.744635	-0.613666	3.10112	0.240842	1.2173e-07	2.22258e-06		Potri.008G127200	4.00107	4.40729	4.06665	4.67766	0.000113104	0.000553297
Potri.008G193000	-1.14193	-0.770099	0.603377	1.07093	1.22848e-07	2.24152e-06		Potri.010G062600	1.24828	2.05781	1.73174	2.57295	0.000113473	0.00055491
Potri.005G227900	0.732281	3.05865	0.312463	-0.889935	1.23185e-07	2.24619e-06		Potri.005G192600	1.30452	1.08841	1.59219	2.65468	0.000114801	0.000560512
Potri.010G052700	-0.345572	-0.355582	1.51433	0.289324	1.24498e-07	2.26717e-06		Potri.005G214000	2.27834	2.26255	2.19389	3.28235	0.000115199	0.000562062
Potri.012G041900	-0.266599	-0.917553	1.43687	0.133752	1.24806e-07	2.27128e-06		Potri.005G043700	4.72958	4.54414	5.23016	2.95714	0.000115831	0.000564947
Potri.014G087200	-0.124491	-0.984538	1.29016	0.157998	1.39482e-07	2.5078e-06		Potri.018G042000	2.55048	1.88273	1.90645	3.08068	0.000116204	0.000566372
Potri.004G103500	-2.35091	1.38552	-2.26652	-1.53179	1.40078e-07	2.51311e-06		Potri.003G215400	2.09686	3.98885	5.45924	6.26045	0.000116328	0.000566874
Potri.006G188300	-0.292807	3.19149	-0.271097	-5.01918	1.44913e-07	2.59317e-06		Potri.017G009200	-3.83745	-2.4478	-1.11822	-1.48302	0.000117088	0.00056978
Potri.013G007700	0.860695	0.766578	2.40772	-0.45771	1.45826e-07	2.60687e-06		Potri.017G107200	-2.38228	1.93639	3.27224	-2.38228	0.000117501	0.00057159
Potri.T003100	0.568505	2.43322	-0.703233	-2.69452	1.46468e-07	2.61429e-06		Potri.003G122000	-1.86557	-1.42962	-2.18674	-2.25075	0.000117956	0.000573399
Potri.008G106400	-0.960295	3.91168	-0.648291	0.500524	1.52774e-07	2.7112e-06		Potri.004G157300	-1.92239	-1.7106	-1.88718	-1.89276	0.000119552	0.000580753
Potri.004G018800	0	6.58367	0	0	1.60188e-07	2.82836e-06		Potri.002G259400	1.9828	2.4579	1.28677	2.39614	0.000119767	0.000581696
Potri.006G056600	-0.791683	1.47308	-1.97109	-3.32452	1.64089e-07	2.88809e-06		Potri.018G046900	3.59756	1.22773	-2.38389	1.83749	0.000121437	0.000588365
Potri.006G241400	1.97549	-0.617413	0.820206	0.377717	1.75464e-07	3.06122e-06		Potri.009G142200	3.34286	2.8657	1.07661	1.00935	0.000121702	0.000589511
Potri.005G012400	0.167637	2.41295	0.0617953	-1.77263	1.75978e-07	3.06635e-06		Potri.010G051800	-5.59859	-3.34491	-5.59859	-2.3019	0.000121849	0.000590055
Potri.002G236800	1.80379	-0.0362537	-0.12818	0.458609	1.79097e-07	3.11485e-06		Potri.001G428700	-1.77202	-3.05768	-3.07475	-2.44933	0.000121953	0.000590352
Potri.013G149100	-0.993875	-2.19053	2.08679	-4.8686	1.79531e-07	3.12046e-06		Potri.010G220200	-1.52643	-2.20808	-4.45177	1.52078	0.000122999	0.000594796
Potri.015G057000	0.44701	-1.04003	1.91782	0.677385	1.8232e-07	3.16302e-06		Potri.006G024200	4.93712	3.62149	5.03881	6.60149	0.0001239	0.000598423
Potri.004G075800	1.58411	0.847788	-0.71174	0.0202075	1.83928e-07	3.18298e-06		Potri.006G111600	2.01278	1.91428	1.49347	2.6554	0.000124375	0.000600454
Potri.015G070700	-3.06479	0.0344535	2.32891	-0.301003	1.84827e-07	3.19457e-06		Potri.009G055100	1.85745	2.1911	2.27092	1.87898	0.000124385	0.000600454
Potri.005G141400	-0.391038	2.19996	-1.38566	-1.32805	1.90805e-07	3.28973e-06		Potri.T164700	-2.24509	-3.16673	-1.70245	-2.94	0.000125538	0.000604862
Potri.004G119000	0.66208	1.87735	-0.265219	0.0711314	1.95142e-07	3.35827e-06		Potri.010G219900	1.52852	1.63915	1.96206	1.94526	0.000126798	0.000610509
Potri.019G094000	0.373081	2.69298	-0.0950508	-5.93162	1.9633e-07	3.37456e-06		Potri.017G009600	-1.21129	-1.64711	-1.20567	-2.33579	0.000127678	0.000613687
Potri.011G058300	-1.25577	1.34576	-3.57164	-1.78797	2.02723e-07	3.47158e-06		Potri.015G044300	-2.82003	-1.81898	-1.52693	-1.00246	0.000128005	0.000614935
Potri.001G188500	-2.17699	3.2532	-1.16609	-4.62187	2.06494e-07	3.53182e-06		Potri.018G150500	-5.30963	-3.05626	-5.30963	-5.30963	0.000128259	0.000615943
Potri.004G182000	-0.570028	-0.307158	1.89924	-2.96996	2.1209e-07	3.62115e-06		Potri.007G136300	3.45958	5.23211	2.49413	6.1644	0.00012837	0.000616267
Potri.016G061000	-0.358575	1.73404	-1.42858	-5.38581	2.12107e-07	3.62115e-06		Potri.004G191200	-3.24542	-1.50189	-1.62038	-1.44754	0.000128877	0.000618484
Potri.009G087200	3.42032	0.830668	-0.0888457	-5.26374	2.30467e-07	3.9035e-06		Potri.018G148000	3.33602	3.03804	1.23642	1.8865	0.000129305	0.000620113
Potri.001G301400	-1.46427	1.2592	-1.66761	-1.6656	2.34713e-07	3.96819e-06		Potri.T030900	2.58469	3.92293	2.5668	1.15189	0.000129767	0.000622002
Potri.009G016600	0.172499	-0.707459	1.83198	0.429396	2.36349e-07	3.99342e-06		Potri.002G099900	2.86266	2.4994	1.88308	2.64923	0.000130392	0.000624353
Potri.002G248900	0.299957	0.595193	2.11518	-0.24558	2.40491e-07	4.05113e-06		Potri.T035100	2.66449	2.27302	1.18715	2.12866	0.000130592	0.000625115
Potri.006G232700	-2.72153	-0.212084	1.92825	0.561939	2.44418e-07	4.10735e-06		Potri.013G153400	2.81808	1.85577	2.24391	1.19784	0.000130596	0.000625115
Potri.002G109300	0.464228	-0.784759	2.7805	-1.4364	2.51459e-07	4.2093e-06		Potri.010G079600	-4.1408	-3.18377	-6.25348	-3.81303	0.00013155	0.000629247
Potri.013G092500	-0.414508	-0.0642652	-0.730739	1.95083	2.52375e-07	4.22068e-06		Potri.013G067000	1.16994	2.00763	2.6725	1.70259	0.000131687	0.000629794
Potri.017G068400	-3.15895	4.52437	-0.630349	-3.15895	2.55333e-07	4.25992e-06		Potri.011G155700	2.33519	2.49776	1.16559	1.7852	0.0001319	0.000630596
Potri.012G144800	1.38406	0.749182	-1.17973	0.484203	2.61156e-07	4.34149e-06		Potri.001G279300	1.62759	1.76821	2.04761	2.02693	0.000132987	0.000634811
Potri.005G200500	1.70329	0.738987	-0.761441	-0.582376	2.62454e-07	4.35787e-06		Potri.006G260000	2.02075	2.40065	1.43258	3.02344	0.000134559	0.000641216
Potri.014G066400	0.148294	2.76443	0.59186	-5.04375	2.7628e-07	4.56838e-06		Potri.001G023500	1.83803	1.58235	1.88105	2.3569	0.000135033	0.00064303
Potri.001G231300	-0.903131	-1.67241	0.262783	1.82479	2.80242e-07	4.62839e-06		Potri.010G059400	2.38051	2.65259	2.96382	1.92799	0.000136748	0.000649419
Potri.009G119700	0.144588	1.07684	-1.55488	-0.500836	2.96589e-07	4.87813e-06		Potri.014G025600	3.58492	3.63221	4.13342	4.75566	0.000136809	0.0006496
Potri.017G101700	2.29084	0.722129	0.859912	0.323941	2.97045e-07	4.88275e-06		Potri.003G177100	-5.1626	-5.1626	-5.1626	-5.1626	0.000136887	0.000649747
Potri.016G129600	0.132751	-1.68811	1.56578	-9.92836	3.02076e-07	4.95376e-06		Potri.008G125400	-5.1626	-5.1626	-5.1626	-5.1626	0.000136887	0.000649747
Potri.010G071400	-4.19404	-1.51779	2.55146	-0.974212	3.06489e-07	5.01727e-06		Potri.002G245400	2.15258	2.10097	1.82135	1.52575	0.000140528	0.000666006
Potri.004G173900	-0.35074	1.41658	-1.51892	0.215216	3.17632e-07	5.1875e-06		Potri.002G094200	2.78519	2.2743	1.91228	2.44968	0.000141954	0.000671388
Potri.005G205800	-0.395818	-1.43817	1.05821	-0.250853	3.20439e-07	5.2272e-06		Potri.018G118500	-2.92584	-5.86488	-5.86488	-3.43171	0.000143165	0.000676198
Potri.005G073100	0.390929	-0.183896	0.770628	2.04565	3.30223e-07	5.36795e-06		Potri.011G012400	-3.79457	-3.79457	-3.79457	1.5443	0.000145978	0.000688198
Potri.002G020500	-0.0141962	1.88831	0.558719	-0.882817	3.3085e-07	5.37501e-06		Potri.013G047600	-1.30675	-1.96056	-2.31981	-1.53707	0.000146323	0.000689473
Potri.005G143100	-1.90135	-3.07986	1.24837	-2.30994	3.43336e-07	5.55196e-06		Potri.008G062600	-1.90127	-2.02814	-1.48625	-1.34975	0.000146983	0.000691846
Potri.004G176100	0.299038	0.417769	1.82253	-0.476871	3.43753e-07	5.55549e-06		Potri.010G170100	-1.2279	-1.28463	-1.61691	-1.53571	0.000148207	0.000696576
Potri.010G202400	0.621466	-0.58123	1.57117	0.366802	3.46578e-07	5.59789e-06		Potri.008G165500	2.68594	2.93368	3.09767	2.74524	0.000148676	0.000698545
Potri.006G102500	-0.981648	-1.5705	0.810271	1.06034	3.54288e-07	5.70259e-06		Potri.001G325800	3.03682	4.12119	2.71733	2.81314	0.000149218	0.000700621
Potri.006G002800	1.53957	-0.580306	0.350623	0.426484	3.58498e-07	5.76702e-06		Potri.015G000800	3.56238	2.91325	3.21574	3.6511	0.000149664	0.000702477
Potri.006G034000	-0.667194	-0.783319	0.386945	1.22298	3.65613e-07	5.86001e-06		Potri.008G127100	-3.80068	-1.54382	1.95869	-3.80068	0.000149715	0.000702478
Potri.009G162400	0.297986	1.56134	0.761841	-3.48179	3.66548e-07	5.8687e-06		Potri.009G142300	1.73554	1.90875	3.48837	4.58049	0.000151084	0.000707753
Potri.016G016100	-1.68881	-2.38253	2.35767	0.0793044	3.66715e-07	5.8687e-06		Potri.001G387000	3.48325	3.79247	3.18565	2.4603	0.000151702	0.000710124
Potri.002G140500	-1.0848	-0.594738	1.08255	0.333867	3.80326e-07	6.06562e-06		Potri.004G033000	3.05753	4.74469	3.56855	3.48672	0.000153457	0.00071749
Potri.009G112500	0	6.37811	0	0	3.80864e-07	6.06726e-06		Potri.004G208500	1.7224	2.06679	1.70089	1.89806	0.000153899	0.000719073
Potri.015G116800	-0.513097	2.22718	-1.53994	-1.07317	3.81682e-07	6.07335e-06		Potri.006G144200	1.05816	1.24328	-4.69975	-2.26509	0.000154266	0.000720667
Potri.004G027700	0	5.61832	0	0	3.87098e-07	6.13849e-06		Potri.001G110700	1.98211	1.53571	2.7025	3.59473	0.000154523	0.000721746
Potri.014G126100	2.10337	0.897687	0.937329	-0.149493	3.94328e-07	6.24603e-06		Potri.009G105200	-1.70174	-1.57131	-1.61083	-1.0206	0.000154712	0.000722265
Potri.006G022100	1.72503	-0.157147	-0.0489607	0.162423	3.97726e-07	6.29627e-06		Potri.013G156600	-5.09246	-5.09246	-5.09246	-5.09246	0.000155123	0.000723944
Potri.009G113600	-0.110691	-1.07022	1.24991	0.485174	4.06192e-07	6.41572e-06		Potri.018G008000	2.10066	2.17806	1.46225	2.78716	0.00015535	0.000724756
Potri.012G022400	-0.300576	-1.65253	2.43553	-2.83157	4.06685e-07	6.41637e-06		Potri.010G208800	-2.47304	-3.12093	-4.01995	-3.55361	0.000159067	0.000740733
Potri.016G042100	1.93163	0.296062	0.347727	0.506235	4.06694e-07	6.41637e-06		Potri.001G084600	3.73298	2.66129	2.75007	3.19311	0.000159735	0.000743467
Potri.006G062300	-0.367561	-1.01062	1.19328	0.703719	4.23615e-07	6.66065e-06		Potri.T111400	-1.77431	-3.87617	-2.76498	-6.13103	0.000160417	0.000746518
Potri.006G098100	-4.64659	2.67566	-1.22263	-4.64659	4.23851e-07	6.66065e-06		Potri.018G016500	2.91291	2.51739	1.94189	1.12925	0.000161722	0.000752088
Potri.018G125700	0.139249	-2.32752	-2.32752	3.9232	4.44939e-07	6.95673e-06		Potri.018G148100	-2.12713	-1.27073	-3.28544	-1.36017	0.00016194	0.000752847
Potri.003G089800	-1.15516	0.604585	0.615528	2.58078	4.56922e-07	7.13608e-06		Potri.001G437200	3.69542	4.57933	4.18669	4.01614	0.000163449	0.000758975
Potri.001G092200	0.287492	2.03623	-1.78452	-4.21267	4.6805e-07	7.28944e-06		Potri.005G109100	1.67876	1.78158	2.10643	1.69139	0.000163802	0.000760362
Potri.012G134200	-0.10061	0.0608196	2.05908	-2.80582	4.69296e-07	7.30476e-06		Potri.006G102700	2.15762	2.18713	1.11936	1.54199	0.000163954	0.00076081
Potri.015G137600	-0.194869	2.14638	-0.250663	-0.353432	4.78082e-07	7.42493e-06		Potri.012G055600	2.54766	1.19754	2.49547	1.37443	0.000164978	0.000764926
Potri.001G235300	-0.122659	-0.588485	2.0933	-0.473065	4.87074e-07	7.53369e-06		Potri.001G237700	5.4541	6.42844	4.59979	5.97433	0.000165446	0.000766203
Potri.009G067000	-0.249173	1.55174	-1.37471	-0.232822	4.89974e-07	7.57163e-06		Potri.006G034600	5.841	3.0881	2.49088	3.83325	0.00016633	0.000769526
Potri.002G155200	-0.0112485	-0.698965	1.6783	0.387744	5.04497e-07	7.7788e-06		Potri.005G162300	3.02721	2.42852	1.71953	2.53133	0.000167895	0.000776121
Potri.001G240600	-0.0308685	1.37263	-0.943303	-4.01038	5.52751e-07	8.42952e-06		Potri.003G060100	1.77072	2.16575	1.11385	1.24921	0.000168215	0.000777469
Potri.004G102600	0	6.28695	0	0	5.61608e-07	8.55524e-06		Potri.001G025200	-4.8923	-2.84492	-1.5741	-1.94981	0.00016831	0.00077778
Potri.008G111600	0.377084	1.95669	-1.12033	-1.47761	5.63643e-07	8.56917e-06		Potri.013G086400	1.85803	1.29639	1.13369	1.94604	0.000168754	0.000778926
Potri.008G067500	2.12956	-0.0170866	0.861942	0.147464	5.63753e-07	8.56917e-06		Potri.006G272800	2.11187	1.99429	2.19384	2.24224	0.000168958	0.000779735
Potri.003G002600	0.0935801	2.51048	0.202018	-2.97411	5.75986e-07	8.75033e-06		Potri.007G047000	-1.11634	1.37017	-2.06762	-2.04781	0.000173694	0.00080053
Potri.015G108200	-1.64014	1.40532	0.793796	0.725816	5.91098e-07	8.95064e-06		Potri.014G080000	2.24534	1.42481	2.27663	1.59335	0.000174219	0.000802419
Potri.004G235200	1.89034	0.316012	0.0423241	0.58744	6.02081e-07	9.1021e-06		Potri.018G052500	1.39677	3.91521	1.46822	2.68342	0.000174426	0.000803103
Potri.001G102400	0.822215	-0.820195	1.74682	-3.68247	6.03405e-07	9.11278e-06		Potri.017G133500	-1.70346	-1.38293	-3.4665	-1.18616	0.000174709	0.000804008
Potri.018G116300	-0.62507	1.47565	-1.11035	0.0282851	6.03441e-07	9.11278e-06		Potri.010G072200	1.28025	-1.10309	1.88866	1.34117	0.000174897	0.00080474
Potri.016G126700	1.35441	-0.727752	0.0367374	0.462729	6.04681e-07	9.12161e-06		Potri.003G174100	-1.14215	-4.44879	-1.42238	-3.40644	0.000174997	0.000805068
Potri.006G102000	1.49392	-0.390698	-0.625256	0.257115	6.09203e-07	9.17989e-06		Potri.001G397200	2.74675	1.35194	2.40426	3.22334	0.000176159	0.000809611
Potri.008G123500	-0.251905	-0.774571	2.05524	0.641334	6.15376e-07	9.25788e-06		Potri.012G044400	5.34925	4.54682	6.18068	6.69194	0.000176641	0.000811288
Potri.018G009300	0.814903	1.27935	-0.156105	-3.7601	6.18022e-07	9.29268e-06		Potri.005G174700	1.7469	2.52635	1.52704	1.48873	0.000177936	0.000816427
Potri.001G251900	2.35852	0.575321	0.768878	0.607739	6.1875e-07	9.29861e-06		Potri.007G049100	-5.26612	-5.26612	-5.26612	-1.96942	0.000178044	0.000816516
Potri.018G138900	-0.0759133	2.32068	-1.05886	-0.398657	6.29018e-07	9.42748e-06		Potri.015G083400	2.05743	1.88779	1.96362	1.72154	0.000178262	0.000817383
Potri.008G178300	-0.52174	1.177	-3.48054	-6.02256	6.49276e-07	9.68423e-06		Potri.006G095300	-4.1481	-4.1481	-1.6562	1.35261	0.000178689	0.000819071
Potri.015G023200	1.19241	0.775986	-1.35474	-0.878538	6.5473e-07	9.75513e-06		Potri.003G051400	2.97692	3.13706	2.25382	3.97011	0.000179368	0.000822049
Potri.001G246400	0.560207	2.0559	-0.154352	-0.392348	6.62911e-07	9.86647e-06		Potri.004G179300	4.21379	3.59295	4.00117	3.32743	0.000180734	0.00082708
Potri.015G076400	-0.964806	0.64202	2.08281	0.935851	6.73394e-07	1.00046e-05		Potri.001G413300	-1.15962	-1.90969	1.25655	1.01963	0.000184745	0.000842412
Potri.018G013500	0.0518234	-0.706136	1.56575	0.160115	7.46146e-07	1.09359e-05		Potri.003G187600	-5.30982	-2.23111	-5.30982	-5.30982	0.000184991	0.00084323
Potri.011G150900	-0.725998	2.20889	-1.67576	-6.32991	7.67218e-07	1.12093e-05		Potri.014G088700	-5.5998	-5.5998	-1.34399	-2.3031	0.000185456	0.000845073
Potri.013G057200	0.1655	1.48499	-0.869633	0.539368	7.85476e-07	1.14532e-05		Potri.018G092800	4.37839	4.54703	5.60378	6.62292	0.000185763	0.000846333
Potri.004G034200	-1.10958	1.65807	-1.40743	-2.79745	8.41872e-07	1.22295e-05		Potri.T044500	-5.33202	-5.33202	-2.83731	-5.33202	0.000188585	0.000857644
Potri.005G094900	0.784557	0.0646943	2.49116	0.743065	8.67049e-07	1.2569e-05		Potri.015G001800	2.57379	2.83272	-3.24424	2.38769	0.000189508	0.000861551
Potri.001G028500	-0.626266	1.17098	-2.50141	-0.504287	8.79731e-07	1.2733e-05		Potri.001G202000	-1.3053	-1.40207	-2.79644	-1.48657	0.000190252	0.00086427
Potri.002G110200	-0.832298	1.3656	-2.20128	-5.6241	8.89202e-07	1.28634e-05		Potri.014G087700	1.40884	1.01228	1.43256	2.18347	0.00019026	0.00086427
Potri.007G070900	0.422624	0.455316	2.35695	0.717166	9.10171e-07	1.31395e-05		Potri.008G016700	2.09953	2.24329	5.78572	3.2967	0.000192938	0.000875148
Potri.002G075700	-1.24665	-0.4001	1.19445	-1.08125	9.16821e-07	1.32081e-05		Potri.004G097000	-5.33198	-5.33198	-5.33198	-2.89802	0.000193045	0.000875491
Potri.011G146900	-0.0637757	-1.48311	1.84214	0.978698	9.32215e-07	1.34091e-05		Potri.001G439800	6.57735	6.27878	7.76729	6.31224	0.000193089	0.000875549
Potri.014G059000	2.40658	0.653752	0.318121	0.82857	9.54516e-07	1.37016e-05		Potri.009G116200	-1.32943	-1.25828	-1.83583	-1.52678	0.000193793	0.000878454
Potri.011G003400	1.62637	0.445887	0.0421281	-0.158204	9.64231e-07	1.38196e-05		Potri.003G134600	3.01306	2.42589	3.19035	1.79278	0.000195381	0.000884931
Potri.001G205900	-0.103829	-4.66514	-1.24211	2.21206	9.77368e-07	1.39864e-05		Potri.006G234400	-1.73425	-1.59321	-1.17052	-1.21701	0.000196193	0.00088795
Potri.012G101800	0	6.13845	0	0	1.06347e-06	1.51099e-05		Potri.001G288600	4.46102	3.00715	4.4138	5.07983	0.000196885	0.00089029
Potri.011G140200	1.55052	0.405741	-0.388176	-5.19448	1.09186e-06	1.54974e-05		Potri.018G139300	1.69116	1.61555	2.05855	1.8647	0.000197096	0.000891098
Potri.014G170600	0.00904057	1.55731	-0.511832	0.383459	1.0954e-06	1.55304e-05		Potri.009G083100	2.30111	3.41199	3.21286	3.12606	0.00019833	0.000896097
Potri.012G062300	-1.23417	-0.563594	0.723342	1.2236	1.09585e-06	1.55304e-05		Potri.017G117500	1.05527	2.37926	4.12783	1.82518	0.000200493	0.000905279
Potri.008G083600	0.224589	-0.669962	-0.789925	1.59558	1.11148e-06	1.57358e-05		Potri.014G197200	2.44639	1.90342	1.1324	1.70655	0.000201274	0.000908069
Potri.005G204600	0.170494	0.00496387	2.48433	-0.907315	1.13107e-06	1.6005e-05		Potri.004G033100	-1.4542	-2.35971	-1.24701	-1.40729	0.000201985	0.000910979
Potri.016G058100	1.6356	0.0285552	0.555793	-0.650021	1.14439e-06	1.61689e-05		Potri.003G190400	2.07476	1.66212	-1.21297	1.36636	0.000202316	0.000912326
Potri.001G304700	1.5125	-0.0375617	-0.449385	0.975741	1.15645e-06	1.62979e-05		Potri.006G200600	4.58807	6.11323	5.80148	3.8305	0.00020408	0.000919685
Potri.018G125200	1.18066	-0.51627	-0.901456	-0.356864	1.15924e-06	1.63289e-05		Potri.005G211300	2.11283	2.27485	2.22182	4.24877	0.000205524	0.000924989
Potri.006G060000	1.06091	0.713418	0.73303	-3.0484	1.16558e-06	1.641e-05		Potri.013G049700	-2.26186	-1.28127	-2.39506	-1.95579	0.000206788	0.00093038
Potri.010G131600	-0.14334	1.16935	0.328799	-7.20036	1.17347e-06	1.65044e-05		Potri.004G104700	6.07019	4.32615	2.49245	4.21504	0.000206879	0.000930638
Potri.T094100	-0.779981	3.03966	-0.660173	-0.267012	1.20989e-06	1.69737e-05		Potri.002G020100	-2.20647	-3.11742	-1.65418	-1.37312	0.000207003	0.000931043
Potri.006G038900	-0.639247	-0.748131	0.975716	1.82496	1.26486e-06	1.76915e-05		Potri.014G179300	1.0529	1.44776	1.70381	1.89115	0.000208627	0.000937589
Potri.003G187900	0	5.79473	0	0	1.27435e-06	1.78065e-05		Potri.006G231700	1.88513	1.94204	2.03457	2.64016	0.000210185	0.000943675
Potri.005G225600	0.129096	2.46231	-1.70327	-7.00821	1.28354e-06	1.79078e-05		Potri.004G050500	-1.16335	1.04435	1.65049	2.26213	0.000210955	0.000946674
Potri.001G367500	-2.31432	-0.515081	1.42048	0.4889	1.34281e-06	1.86414e-05		Potri.T147300	2.59342	1.33364	2.01403	1.54152	0.000213878	0.000958555
Potri.001G413700	2.11419	0.862275	0.635304	-0.230457	1.35319e-06	1.87761e-05		Potri.006G038600	-2.28755	-2.33523	-4.58281	-1.58256	0.000214239	0.000960016
Potri.001G319800	1.87254	0.657584	-1.93983	0.753139	1.36236e-06	1.88846e-05		Potri.008G019700	-1.06913	1.70478	1.38872	1.09189	0.000214324	0.000960245
Potri.003G114000	0.111416	1.24496	-0.718351	-0.367871	1.37222e-06	1.90118e-05		Potri.003G143800	2.14237	1.86525	2.0311	1.87813	0.000214874	0.000962086
Potri.005G237600	0.309299	-0.840446	1.58145	-1.32866	1.40137e-06	1.93772e-05		Potri.002G052400	-1.6283	-1.07455	-1.80444	-1.25589	0.000215774	0.000965031
Potri.003G170900	-0.920278	-2.34701	-1.33372	1.06694	1.42302e-06	1.96472e-05		Potri.014G102600	-4.32949	-2.9632	1.19342	2.14771	0.000216876	0.000969489
Potri.012G067500	2.40651	0.677296	0.817834	-2.4647	1.42396e-06	1.96505e-05		Potri.001G110900	-6.83587	-3.22877	-2.51387	-1.19995	0.000218459	0.00097578
Potri.017G113000	-0.052855	-1.03016	2.06286	0.603666	1.43269e-06	1.97416e-05		Potri.014G171500	4.64818	5.00323	2.94978	4.57093	0.000219946	0.000981321
Potri.005G237200	-0.576878	2.5648	-5.18034	-5.18034	1.54716e-06	2.11101e-05		Potri.018G001600	3.5865	3.42059	1.21115	2.81927	0.000220262	0.000982257
Potri.013G061800	2.22739	0.427663	0.793742	-1.13237	1.55389e-06	2.11709e-05		Potri.012G104600	2.42291	2.47208	1.72961	1.23748	0.000220757	0.000984258
Potri.014G135100	-0.837725	2.61697	-0.152048	-1.05287	1.5981e-06	2.16778e-05		Potri.001G077700	-3.52469	-5.62194	-5.62194	-3.18254	0.000220834	0.000984334
Potri.001G263900	-0.142752	1.53233	-0.876989	-3.68714	1.62385e-06	2.19843e-05		Potri.007G016700	1.08515	-2.37883	2.50466	3.88413	0.000222842	0.000992168
Potri.015G114400	-2.93277	1.20145	-5.38708	-1.37762	1.6454e-06	2.22545e-05		Potri.008G119000	-2.41153	-3.43041	-1.22173	-1.61257	0.00022288	0.000992182
Potri.012G096600	1.62968	0.377075	-0.636587	0.849059	1.66799e-06	2.25134e-05		Potri.008G056000	-1.8318	-1.21926	-1.28117	1.80954	0.000222945	0.000992311
Potri.017G001400	0.844852	0.010683	2.11374	0.726176	1.7256e-06	2.32264e-05		Potri.011G140600	-1.58996	-2.79865	1.75749	3.36676	0.000223226	0.000993402
Potri.001G413300	2.36102	0.16712	0.755266	-1.0354	1.74145e-06	2.34284e-05		Potri.005G179900	-2.39213	-1.01668	-1.94688	1.31092	0.000223437	0.000994183
Potri.008G086700	1.54137	-0.0763844	-1.79947	-0.848576	1.74741e-06	2.34972e-05		Potri.002G154000	1.01903	1.11415	2.68813	2.13222	0.000223748	0.000995405
Potri.009G108400	-2.33857	3.76628	-2.33857	0.260895	1.76325e-06	2.36759e-05		Potri.010G105700	2.32631	0.7105	-6.04013	-4.86224	3.83804e-65	2.13364e-61
Potri.011G002600	-1.09851	-2.27612	-0.250485	1.50458	1.80479e-06	2.41988e-05		Potri.004G055900	6.58901	-1.54624	-3.79032	-0.49652	3.34484e-50	7.15179e-47
Potri.006G226400	-0.886701	0.482642	1.87419	-1.40823	1.85441e-06	2.47925e-05		Potri.017G079000	-0.835427	-1.50564	-6.65582	-6.11219	5.34537e-46	7.81999e-43
Potri.015G073600	-0.834295	-1.22309	1.24375	0.334061	1.8625e-06	2.48768e-05		Potri.003G131200	-4.17918	-4.61664	1.17636	0.89598	2.96451e-45	3.58268e-42
Potri.016G021800	-0.722524	-0.872985	1.08887	0.851325	1.88447e-06	2.51341e-05		Potri.007G104800	-10.1502	-7.90778	0.903194	2.76487	1.15431e-42	1.06951e-39
Potri.018G088500	-1.21118	-1.11935	0.529707	1.71152	1.89082e-06	2.52067e-05		Potri.008G101000	9.48984	0	3.34047	3.29669	2.27188e-38	1.50355e-35
Potri.016G018700	-0.438847	-0.726446	1.3118	0.379909	1.89614e-06	2.52534e-05		Potri.011G158600	-6.05919	-5.03212	1.09066	0.272379	2.73339e-37	1.76692e-34
Potri.018G086400	2.17682	0.895686	-0.175331	-0.533483	1.92598e-06	2.56141e-05		Potri.004G125800	-4.09098	-0.571927	2.89771	3.52749	1.61421e-35	8.62859e-33
Potri.003G163600	1.4288	-0.738072	0.450264	-0.0550692	1.93636e-06	2.57154e-05		Potri.005G020300	0.0134	-1.51773	-5.34605	-5.31391	4.1197e-35	2.08202e-32
Potri.001G140500	0.57695	2.40704	-0.322692	0.893534	2.01194e-06	2.66303e-05		Potri.009G042500	2.88685	6.02806	2.21101	-0.418029	4.34121e-35	2.15479e-32
Potri.016G057400	-1.04722	1.96203	-1.54136	-5.18517	2.05096e-06	2.70825e-05		Potri.008G161100	-2.59248	-0.844781	2.78168	1.88861	2.10642e-33	8.6103e-31
Potri.019G028700	-0.0240602	-0.792319	-2.60931	1.9288	2.12393e-06	2.78874e-05		Potri.002G134300	-3.66991	-2.92443	1.02502	0.939719	2.98316e-31	1.0365e-28
Potri.010G114000	1.96176	-0.309319	0.990066	0.575019	2.15632e-06	2.82461e-05		Potri.017G144800	-4.72536	-0.596274	1.87889	1.25808	5.70972e-31	1.91214e-28
Potri.T097200	2.98279	0.700419	0.310841	0.179351	2.16355e-06	2.83142e-05		Potri.004G140000	-4.93092	-2.71388	0.236059	1.55317	6.48243e-31	2.14507e-28
Potri.005G240800	0.215488	1.44042	-0.120344	-0.81279	2.23347e-06	2.9188e-05		Potri.001G060700	-0.308109	-3.23348	5.77412	6.38912	7.42172e-31	2.42699e-28
Potri.007G111800	-0.663646	2.47847	-0.47069	-6.43829	2.3106e-06	3.01113e-05		Potri.004G155300	1.99991	0.925056	-1.71601	-2.65374	1.28014e-30	4.04351e-28
Potri.002G067800	-0.373026	-0.244533	1.34748	-0.405975	2.33548e-06	3.03929e-05		Potri.017G053200	-2.41631	-0.0822027	2.20515	2.465	1.54762e-30	4.83343e-28
Potri.001G070700	-0.293431	1.08525	0.536112	-2.67321	2.37572e-06	3.08877e-05		Potri.011G025200	1.17701	0.986904	-5.58004	-4.53047	1.90297e-30	5.87723e-28
Potri.001G239600	0.852862	2.76318	0.469421	0.853472	2.40501e-06	3.12102e-05		Potri.014G034600	1.96001	0.334622	-1.9771	-2.36229	1.93676e-30	5.91585e-28
Potri.006G181500	1.37501	-0.0756103	-0.534352	0.93699	2.43406e-06	3.15311e-05		Potri.007G024000	-7.54474	-5.27443	-1.17813	-0.469633	6.19764e-30	1.8725e-27
Potri.007G039100	-0.308509	1.91093	0.812108	0.193447	2.46059e-06	3.1813e-05		Potri.002G195400	2.4877	5.85053	2.13341	0.0361654	1.29503e-29	3.63603e-27
Potri.004G029900	0.308985	1.10059	-1.23882	-0.560349	2.49776e-06	3.22188e-05		Potri.005G184700	-6.20407	-3.45455	0.519556	1.10499	1.66857e-29	4.59204e-27
Potri.001G297700	-3.1592	4.4317	-0.6303	-0.529694	2.51129e-06	3.23734e-05		Potri.007G080600	-4.2319	-3.75457	-1.59677	-0.522923	6.38037e-29	1.64212e-26
Potri.002G167300	0.984488	-0.180188	1.46878	-1.14923	2.52186e-06	3.24246e-05		Potri.012G131800	-2.45405	-5.94808	0.69546	2.28882	1.41466e-28	3.57472e-26
Potri.002G214800	-0.582459	-1.61769	1.03953	0.913491	2.54463e-06	3.26871e-05		Potri.001G268600	4.97912	3.67778	2.65905	0.876113	1.48853e-28	3.72748e-26
Potri.015G008100	1.54856	0.0698044	-0.707989	-0.612528	2.59985e-06	3.33142e-05		Potri.005G075400	-5.98515	-5.24107	-1.71038	-0.148581	1.63463e-28	4.0568e-26
Potri.015G039100	-0.574417	2.09552	-1.0183	-1.89924	2.61393e-06	3.3454e-05		Potri.012G005900	0.523649	-2.28129	-6.34863	-5.6599	1.91395e-28	4.70797e-26
Potri.017G106800	1.625	0.39526	0.191522	-0.560859	2.6227e-06	3.35509e-05		Potri.008G193800	-0.0903245	1.95498	-2.51746	-2.49036	2.004e-28	4.88625e-26
Potri.009G046500	1.07291	0.972136	-0.925888	-0.168757	2.65949e-06	3.39092e-05		Potri.016G120100	1.38973	0.0407401	-2.84103	-3.47844	4.41847e-28	1.04081e-25
Potri.017G001900	1.16157	0.386026	-1.19775	0.378252	2.67118e-06	3.40148e-05		Potri.006G054200	3.18637	0.902383	-3.65395	-2.23757	4.45827e-28	1.04136e-25
Potri.010G190600	2.2975	0.886491	-0.226172	-2.50051	2.69332e-06	3.42811e-05		Potri.010G062900	-2.42806	-0.258133	1.64649	2.43893	5.29232e-28	1.22588e-25
Potri.011G039200	-0.659127	1.35005	0.685161	-0.717343	2.72495e-06	3.45889e-05		Potri.003G151000	4.37119	1.59746	1.22204	0.280264	8.99361e-28	2.066e-25
Potri.010G175300	-0.183837	2.50453	0.261729	-1.54584	2.73639e-06	3.47025e-05		Potri.003G165600	8.97926	6.49589	0	3.29944	1.36221e-27	3.07836e-25
Potri.019G008500	-2.32938	3.28894	-2.32938	-2.32938	2.73882e-06	3.47119e-05		Potri.001G406600	-3.10976	-0.276054	1.87489	2.70039	1.79604e-27	3.99383e-25
Potri.012G086800	1.13984	0.947943	-1.43228	0.450331	2.76139e-06	3.49558e-05		Potri.008G193000	-3.50219	-0.851988	1.53653	1.54721	2.12599e-27	4.69001e-25
Potri.017G081700	0.551205	2.64432	-0.187468	-7.59603	2.88355e-06	3.63535e-05		Potri.009G119700	1.86156	-0.867771	-2.24124	-2.09147	8.52254e-27	1.79464e-24
Potri.008G198800	-0.650008	-0.974333	0.594935	1.61394	2.88859e-06	3.64006e-05		Potri.014G170600	2.24767	1.9477	-0.970401	-1.5109	8.60951e-27	1.79932e-24
Potri.001G414700	-0.400467	-1.69677	1.03913	0.846125	2.89792e-06	3.65017e-05		Potri.013G109000	-4.78643	-1.69293	0.719378	1.16796	1.11415e-26	2.294e-24
Potri.006G014300	0.780093	2.04257	0.339708	-3.72061	2.99296e-06	3.75968e-05		Potri.002G191600	5.10446	3.0712	1.25358	0.662194	1.85727e-26	3.61572e-24
Potri.016G124300	-2.17862	1.16887	-0.518871	-3.44023	3.04225e-06	3.81644e-05		Potri.013G150500	-4.61828	-2.79571	1.15783	0.697062	1.97142e-26	3.80539e-24
Potri.001G330900	-0.402979	-0.414039	1.19405	0.691332	3.09577e-06	3.87836e-05		Potri.012G016400	-5.77736	-5.99265	-1.91654	-0.154149	1.42456e-25	2.58805e-23
Potri.006G105100	-0.338771	-0.0062987	1.06641	-0.836538	3.09579e-06	3.87836e-05		Potri.010G042100	-6.04036	-5.63111	0.205223	1.61337	3.00477e-25	5.28611e-23
Potri.015G018200	0.2523	0.521907	2.27861	-1.10192	3.17396e-06	3.96561e-05		Potri.002G006100	-3.79739	-1.67482	1.16771	0.986736	3.10603e-25	5.42988e-23
Potri.004G165500	-5.37851	1.22738	-0.750729	-5.37851	3.19003e-06	3.98122e-05		Potri.005G064300	-3.79184	-4.18214	-0.0119945	1.85452	8.76077e-25	1.45105e-22
Potri.002G178100	-0.255236	0.128363	1.80934	0.952889	3.23405e-06	4.02983e-05		Potri.006G097100	2.3014	4.74266	1.75764	-0.925888	8.77018e-25	1.45105e-22
Potri.011G031800	4.59616	-0.486847	0.774044	0.07909	3.24873e-06	4.0376e-05		Potri.010G199100	-3.08754	-4.3205	0.945073	2.72831	1.147e-24	1.85361e-22
Potri.008G087200	0.774012	0.897664	2.58494	0.526276	3.30759e-06	4.1013e-05		Potri.014G111400	-2.73408	-0.566714	1.98316	1.60272	1.69552e-24	2.66264e-22
Potri.003G122800	-0.458878	-1.05748	1.26372	0.336961	3.30982e-06	4.10224e-05		Potri.005G116900	-4.54022	-3.67583	-1.12662	0.329994	3.37666e-24	5.21432e-22
Potri.T094200	-1.79808	3.02631	0.222065	-5.45518	3.33248e-06	4.12848e-05		Potri.010G183500	0.318646	3.84857	-1.60948	-2.28981	4.00456e-24	6.14976e-22
Potri.005G003900	-0.0931962	1.80496	-1.11915	0.624012	3.36539e-06	4.16e-05		Potri.017G107500	-2.4993	-0.33703	2.59263	2.82859	5.5945e-24	8.40566e-22
Potri.014G088800	0.599129	0.0507936	1.61106	-0.551857	3.48212e-06	4.28484e-05		Potri.003G112600	-2.80515	-0.30541	1.93149	2.5947	6.6075e-24	9.76926e-22
Potri.005G108400	-1.56383	1.65971	-1.46834	-1.66197	3.48432e-06	4.28484e-05		Potri.001G015500	-1.95494	-0.888361	1.73351	1.95689	1.17195e-23	1.69664e-21
Potri.010G004400	0.158794	2.84188	-0.390968	-1.75723	3.49631e-06	4.29516e-05		Potri.018G109700	-2.83336	-0.84348	1.39678	1.2897	1.18579e-23	1.70779e-21
Potri.003G166500	1.90365	0.875632	-0.107951	0.889845	3.60704e-06	4.41367e-05		Potri.019G120300	-0.865345	-2.44092	-5.9376	-5.20688	1.71388e-23	2.40601e-21
Potri.007G028000	0	5.85106	0	0	3.74163e-06	4.55834e-05		Potri.019G079000	-0.829741	-1.46187	-4.01761	-4.29288	2.7391e-23	3.75054e-21
Potri.012G059100	0.426516	0.369908	2.30944	-0.000159428	3.80666e-06	4.62543e-05		Potri.002G101300	1.55767	4.48347	1.81925	-0.580575	3.01672e-23	4.11043e-21
Potri.019G111500	2.68288	0.811028	-4.10053	-0.643605	3.89976e-06	4.73031e-05		Potri.018G103300	-0.806927	-1.42343	-3.83011	-3.64625	3.94973e-23	5.30371e-21
Potri.011G115100	-0.5745	-0.972855	1.08296	0.164414	3.90374e-06	4.73308e-05		Potri.006G142500	2.708	-0.408237	-1.16453	-1.24252	5.20829e-23	6.86112e-21
Potri.003G012300	-0.0810067	1.35718	-1.04424	0.847246	3.99768e-06	4.82806e-05		Potri.019G091900	-0.333274	-1.88946	4.93921	5.45156	5.4209e-23	7.10752e-21
Potri.019G081000	0.966426	2.66073	0.233465	0.944131	4.0112e-06	4.84229e-05		Potri.006G250100	-5.1808	-3.75479	-1.19391	-0.441489	6.13273e-23	8.00307e-21
Potri.014G006100	0.837298	1.70158	-0.430719	-1.3038	4.07072e-06	4.90565e-05		Potri.004G114300	-7.38808	-6.76028	0.0654249	1.74734	6.87194e-23	8.8843e-21
Potri.005G078600	0.52709	-0.168641	1.64377	0.488548	4.10891e-06	4.93885e-05		Potri.004G095100	3.19233	5.21465	1.85303	-0.483407	7.52138e-23	9.67891e-21
Potri.004G188800	1.33508	-0.0685424	-1.08381	0.274357	4.20744e-06	5.04639e-05		Potri.014G096800	-0.81339	-1.17565	-4.09334	-4.47946	8.76412e-23	1.11747e-20
Potri.001G307800	1.8466	-0.903275	-0.465538	0.349997	4.34454e-06	5.1974e-05		Potri.T094400	-1.33696	-0.0257502	2.76809	2.12239	1.1761e-22	1.47922e-20
Potri.009G149900	0.24124	-1.02326	1.12511	0.339993	4.36652e-06	5.22146e-05		Potri.013G149200	-5.55755	-3.10041	0.55554	2.72758	1.18592e-22	1.48485e-20
Potri.009G122100	1.48918	-0.0566386	0.437978	-0.48157	4.3797e-06	5.23498e-05		Potri.005G094900	-1.54954	-0.429082	2.14799	2.56479	2.31103e-22	2.80512e-20
Potri.017G085300	0.910749	2.45493	0.36469	-5.70207	4.41974e-06	5.27831e-05		Potri.006G002200	7.16494	4.09164	4.42912	0.913182	2.39551e-22	2.89502e-20
Potri.001G186800	-0.914602	1.77554	0.605406	0.482069	4.50041e-06	5.35856e-05		Potri.008G029300	0.744679	1.60688	-2.91529	-3.87615	2.62899e-22	3.14981e-20
Potri.013G023300	2.53875	-0.0206448	-1.24033	-0.654937	4.5595e-06	5.42197e-05		Potri.007G091100	-2.04818	-2.95739	0.997624	2.33658	2.64933e-22	3.16055e-20
Potri.002G126700	0.629618	-0.612574	1.15636	-0.413095	4.6042e-06	5.46678e-05		Potri.010G004200	-3.74024	-1.02596	1.4625	0.886312	3.30463e-22	3.85947e-20
Potri.007G018700	-0.300836	1.40742	-0.509488	-0.119081	4.61399e-06	5.4728e-05		Potri.010G135100	-0.742458	-1.69314	-4.76347	-4.72851	4.07666e-22	4.72145e-20
Potri.011G053300	-0.394049	-1.84153	2.60482	-3.71642	4.75759e-06	5.6287e-05		Potri.002G132900	-0.255422	2.27399	-1.04135	-1.7143	4.11699e-22	4.74837e-20
Potri.001G453600	-0.190344	1.29869	-1.32907	-0.866123	4.88448e-06	5.7544e-05		Potri.009G139800	-3.52689	-2.24986	0.172988	1.07986	4.67674e-22	5.37168e-20
Potri.010G095700	2.44011	0.208083	0.309775	-1.36422	4.89197e-06	5.76077e-05		Potri.003G109200	1.23199	0.32942	1.10456	4.6774	6.17615e-22	6.95029e-20
Potri.002G089800	1.57494	-0.284944	0.467938	0.132568	4.96704e-06	5.82735e-05		Potri.006G065300	-5.43693	-4.0896	-1.8002	-0.47775	6.28987e-22	7.04973e-20
Potri.008G047500	-0.6954	1.66732	0.585775	0.678368	4.96733e-06	5.82735e-05		Potri.006G026600	-8.95887	-2.71793	-0.0652304	2.09086	6.35489e-22	7.094e-20
Potri.015G109300	2.18298	0.501134	0.292774	0.651242	4.98866e-06	5.84746e-05		Potri.006G219300	1.42812	3.94821	0.898993	-1.38929	7.31414e-22	8.03573e-20
Potri.004G173400	1.67875	-0.193805	-0.049144	0.271133	5.16337e-06	6.02689e-05		Potri.009G104300	-0.0253245	-1.28845	-3.96632	-4.03931	7.71102e-22	8.43841e-20
Potri.001G358200	-0.0784714	1.53531	0.872974	-2.72932	5.19072e-06	6.05628e-05		Potri.009G116400	1.25934	-0.0119587	-2.40818	-2.89941	8.84917e-22	9.57088e-20
Potri.004G039400	0.417509	2.30204	0.564787	0.27706	5.26032e-06	6.13235e-05		Potri.001G459500	0.716097	-2.30933	-2.53647	-2.8729	9.38604e-22	1.00731e-19
Potri.013G154900	1.78985	-0.352795	0.923871	0.489806	5.34027e-06	6.21515e-05		Potri.013G010800	1.63747	-0.299791	-2.63599	-2.38178	1.07732e-21	1.1386e-19
Potri.008G018800	1.50911	-0.236224	0.941728	0.841	5.35171e-06	6.22586e-05		Potri.011G071000	-2.74615	-1.33852	0.769039	1.89332	1.68635e-21	1.74252e-19
Potri.002G124800	-4.12598	2.03187	-0.76047	-0.882055	5.35755e-06	6.22745e-05		Potri.003G071900	0.244066	-4.02127	-8.32916	-3.54881	1.75667e-21	1.80846e-19
Potri.007G093000	0.275772	-0.840202	1.27084	-0.0490206	5.37716e-06	6.24503e-05		Potri.T093600	-6.36131	-3.4734	0.215913	3.06547	2.20603e-21	2.23792e-19
Potri.006G084500	0.141312	3.93037	-2.32668	0.27425	5.415e-06	6.28375e-05		Potri.016G109400	-1.95389	-0.920195	1.50673	1.67313	2.62849e-21	2.64716e-19
Potri.008G168600	1.04946	-0.246749	-1.40048	0.281949	5.42249e-06	6.28854e-05		Potri.016G036600	3.58787	3.80265	1.22099	0.215531	2.93185e-21	2.94201e-19
Potri.005G259600	0.684715	0.654343	1.88851	0.124322	5.47013e-06	6.33453e-05		Potri.009G117300	-5.36814	-2.61827	-1.23899	-0.750428	3.45506e-21	3.44218e-19
Potri.001G126700	0.898744	1.12332	-0.76839	-1.32031	5.6788e-06	6.53273e-05		Potri.010G076700	-3.02045	-1.47879	1.06714	0.888717	3.96567e-21	3.92277e-19
Potri.004G200000	2.53799	-0.603827	-0.0435644	-0.0578106	5.74179e-06	6.59974e-05		Potri.005G226600	-1.04441	0.956441	2.68123	3.10225	4.17782e-21	4.10342e-19
Potri.005G109800	0.615503	1.20329	-1.31374	-0.260492	5.75749e-06	6.61506e-05		Potri.012G053600	3.94007	1.86073	-1.22408	0.442488	4.29246e-21	4.20117e-19
Potri.010G234300	1.91587	-0.0125791	-0.132198	0.760386	5.78148e-06	6.63169e-05		Potri.008G130000	-5.40883	-5.87787	1.19983	-0.153927	5.04598e-21	4.87007e-19
Potri.019G105200	2.19383	-1.04614	0.244123	0.40591	5.78824e-06	6.6367e-05		Potri.004G155800	0.508482	-1.60293	3.19671	5.8525	1.13609e-20	1.07046e-18
Potri.004G122800	0	5.34894	0	0	5.79718e-06	6.64422e-05		Potri.017G046200	-2.55716	-1.25062	0.831452	1.56862	1.69715e-20	1.57246e-18
Potri.002G086900	-1.0121	0.294183	1.3666	0.929689	5.81873e-06	6.66344e-05		Potri.010G005600	1.23741	0.922564	-2.59502	-2.22042	2.85822e-20	2.59631e-18
Potri.019G015300	3.20665	0.808501	-1.14197	-1.10454	5.84083e-06	6.68599e-05		Potri.009G144900	3.85007	0.760548	4.38339	4.7307	3.06717e-20	2.75907e-18
Potri.011G163700	0.767884	1.2013	-0.222446	-2.51755	5.92004e-06	6.76555e-05		Potri.001G235300	3.10934	-1.22038	-3.7038	-0.439058	3.70348e-20	3.28888e-18
Potri.003G038200	-1.24016	-1.82141	1.33316	0.0812056	6.03184e-06	6.87077e-05		Potri.017G141600	1.81832	0.463822	-2.455	-2.63158	4.3924e-20	3.83934e-18
Potri.005G032700	1.70083	-0.231072	-0.75651	-1.36549	6.05279e-06	6.889e-05		Potri.009G124400	-1.35641	0.319002	3.04944	2.87389	5.20042e-20	4.50314e-18
Potri.006G220700	0.674201	2.10063	0.646176	-0.759507	6.09604e-06	6.93348e-05		Potri.018G031100	-4.87282	-5.13724	-1.21214	0.254193	5.61995e-20	4.85131e-18
Potri.014G115700	-2.7159	-1.27293	0.0149562	1.73701	6.1443e-06	6.97322e-05		Potri.005G229600	-2.81198	-3.17984	0.30556	1.04411	8.825e-20	7.49327e-18
Potri.018G031500	0.820116	-0.670911	-0.781147	3.08625	6.15691e-06	6.98468e-05		Potri.009G135200	1.96349	-0.436765	-3.44968	-3.98312	1e-19	8.39761e-18
Potri.010G251000	-3.17549	3.11028	0.791847	0.281255	6.17093e-06	6.99489e-05		Potri.T137300	-0.864038	2.19328	-3.95949	-4.0287	1.19151e-19	9.9159e-18
Potri.012G111100	1.34392	-0.287425	-0.32221	0.440107	6.19863e-06	7.02058e-05		Potri.005G002100	2.35908	-1.62459	0.281652	-1.65114	1.39231e-19	1.1518e-17
Potri.008G062300	0.402675	-0.0868008	2.87659	-0.0526156	6.2056e-06	7.02562e-05		Potri.019G130100	-0.507357	-2.23602	-3.65605	-6.24012	1.59457e-19	1.30361e-17
Potri.005G106400	-1.49833	-0.39645	1.25268	0.467041	6.25278e-06	7.06754e-05		Potri.003G012300	2.18697	2.0633	-0.863701	-1.3059	1.87021e-19	1.52001e-17
Potri.012G071400	2.00499	0.153317	0.757111	0.629372	6.32195e-06	7.13993e-05		Potri.006G020000	2.39329	4.34912	2.02582	-0.799499	1.88252e-19	1.52556e-17
Potri.014G020900	1.67997	0.380843	0.118712	-0.0791034	6.35352e-06	7.16687e-05		Potri.008G166200	4.9982	3.21522	0.660536	1.18263	1.97891e-19	1.59901e-17
Potri.011G162400	-0.0732698	1.34798	0.430495	-1.69936	6.51689e-06	7.31562e-05		Potri.003G060300	2.38856	-0.567439	-1.02824	-1.05699	2.74013e-19	2.20767e-17
Potri.001G054400	1.00786	-0.71198	-1.13403	0.261781	6.60585e-06	7.40057e-05		Potri.001G219300	-3.78946	-4.29477	-1.66018	-0.325005	3.63142e-19	2.89223e-17
Potri.006G051700	-0.551312	1.40169	-0.318265	-2.82844	6.63996e-06	7.43579e-05		Potri.013G125300	0.80306	2.98646	6.44253	3.442	4.04593e-19	3.20401e-17
Potri.006G113300	1.16697	0.230195	-0.92418	0.460814	6.8261e-06	7.61364e-05		Potri.014G111200	-1.77331	0.0785609	2.87863	1.99167	4.99452e-19	3.87787e-17
Potri.018G053000	0.890629	1.39553	-0.591142	-3.08256	6.92425e-06	7.70769e-05		Potri.015G099200	5.57957	-3.7569	1.60382	0.456084	5.61333e-19	4.33411e-17
Potri.017G121900	1.15423	-2.10793	-1.49615	-1.76915	7.09364e-06	7.87076e-05		Potri.001G300900	2.13581	2.16473	0.14729	-1.06538	5.9673e-19	4.59466e-17
Potri.006G134500	1.31344	0.768893	-0.112939	-1.36999	7.18179e-06	7.95306e-05		Potri.002G025300	4.81318	0.344528	8.27605	7.20741	8.02152e-19	6.09197e-17
Potri.015G032500	1.82473	0.081868	0.483539	0.609427	7.35452e-06	8.11531e-05		Potri.002G163400	-1.38529	-0.875175	2.19388	2.4567	9.44895e-19	7.09846e-17
Potri.008G087700	-1.20381	2.09128	0.699966	0.841334	7.5422e-06	8.29389e-05		Potri.004G059600	-0.49105	2.39166	-1.31562	-3.33331	1.02006e-18	7.61012e-17
Potri.018G068400	-0.251775	-0.766262	1.79337	0.638877	7.54315e-06	8.29389e-05		Potri.001G016200	1.99183	1.4807	-0.7978	-2.1903	1.02122e-18	7.61012e-17
Potri.013G138000	0.536171	-0.355854	-1.66727	2.11213	7.66065e-06	8.40649e-05		Potri.019G034100	-1.40078	-0.865377	-4.52158	-3.70032	1.16982e-18	8.64796e-17
Potri.014G188100	-3.1752	0.0115506	-3.1752	2.95537	7.68449e-06	8.42935e-05		Potri.006G104100	4.00358	1.7289	1.98912	0.976035	1.66664e-18	1.21272e-16
Potri.001G449800	-0.653414	0.143501	2.58105	0.106513	7.89504e-06	8.62296e-05		Potri.002G082400	3.97133	1.6996	0.356175	1.13416	1.69731e-18	1.23181e-16
Potri.002G012500	0.165894	1.9763	0.986906	0.214008	7.90516e-06	8.63062e-05		Potri.008G158200	-5.25659	-0.228481	2.01783	2.72348	1.76191e-18	1.27205e-16
Potri.002G051300	1.09091	-0.204255	-0.887911	0.794654	7.93698e-06	8.65858e-05		Potri.019G027000	1.49833	-7.68061	2.41923	-0.251191	1.83309e-18	1.31321e-16
Potri.018G019600	0.702758	1.04037	-1.27747	-0.238052	8.00097e-06	8.71815e-05		Potri.011G089700	2.82789	-0.661787	-1.10146	-2.14308	2.63909e-18	1.86657e-16
Potri.018G044900	-0.215295	3.01098	-1.51985	-0.127398	8.0304e-06	8.74337e-05		Potri.009G028100	2.23105	1.39152	-0.377886	-1.57815	2.82218e-18	1.98094e-16
Potri.015G060000	1.90177	0.334717	-0.389328	-0.628936	8.059e-06	8.76425e-05		Potri.002G256300	-2.32325	-0.151249	2.07681	2.06008	3.52243e-18	2.4235e-16
Potri.013G045200	0	0	5.49749	0	8.16019e-06	8.85954e-05		Potri.008G052900	-3.91232	-0.57419	1.55543	3.14032	4.00258e-18	2.74668e-16
Potri.002G178900	-4.11533	2.263	-4.11533	-4.11533	8.16253e-06	8.85954e-05		Potri.017G032800	-3.67587	-2.64671	-0.436136	1.83073	4.20621e-18	2.87262e-16
Potri.009G006400	0.168045	1.71779	-0.188494	-4.50908	8.23201e-06	8.92453e-05		Potri.T059900	0.217678	2.23876	-1.93384	-4.52785	6.16652e-18	4.13023e-16
Potri.008G020000	1.13998	-0.141597	-1.07489	0.538724	8.34808e-06	9.03629e-05		Potri.017G141300	2.40714	3.24976	-0.407133	-1.38472	6.76448e-18	4.509e-16
Potri.018G025100	-2.03842	-2.71711	-1.36192	1.07319	8.42784e-06	9.10848e-05		Potri.008G145500	-3.65893	-2.13916	-0.621009	-1.16488	6.81324e-18	4.53064e-16
Potri.010G142900	-2.56325	-1.22279	1.73377	-1.93214	8.48038e-06	9.15815e-05		Potri.002G107800	-2.06737	-1.76876	0.899703	1.48574	7.12462e-18	4.6928e-16
Potri.018G029400	2.37579	0.592457	0.219949	-0.839286	8.59599e-06	9.26863e-05		Potri.010G098700	-3.64177	-4.10136	-1.51099	-0.0285482	9.00217e-18	5.84636e-16
Potri.019G002900	-0.956635	-1.38585	0.51536	1.11913	8.79636e-06	9.45541e-05		Potri.010G179700	0.353998	6.53063	1.97752	2.4707	9.21451e-18	5.97031e-16
Potri.019G104100	0.729206	2.56236	0.270035	-4.09431	8.97496e-06	9.63253e-05		Potri.004G216900	-2.42764	0.11104	2.00238	1.70377	9.86485e-18	6.37683e-16
Potri.011G044300	-0.583716	-0.343919	1.53617	0.00836622	9.0555e-06	9.70774e-05		Potri.011G132900	1.76233	0.950226	-4.3743	-3.02154	9.94618e-18	6.41448e-16
Potri.013G139600	-1.26065	0.13456	-3.71602	2.70029	9.15975e-06	9.80065e-05		Potri.008G142500	-3.01405	-1.15347	1.1284	0.703369	1.33609e-17	8.4597e-16
Potri.006G039300	-1.85905	-3.38021	-0.18291	1.0591	9.18835e-06	9.8237e-05		Potri.001G379000	-3.86154	-1.87386	1.10392	-0.204395	1.36448e-17	8.61976e-16
Potri.003G117200	0	5.6465	0	0	9.34851e-06	9.98345e-05		Potri.001G016600	-4.85005	-2.62637	-1.43393	-0.677718	1.41384e-17	8.91137e-16
Potri.013G141600	0.648137	-0.61511	-1.65352	2.35892	9.44832e-06	0.000100793		Potri.006G181900	-0.505184	2.70116	-1.13567	-3.408	1.50811e-17	9.44134e-16
Potri.017G100600	-1.76193	1.89282	-2.55801	-5.46358	9.45276e-06	0.000100793		Potri.015G062200	-3.63495	-3.54491	-0.7897	-1.14992	1.5374e-17	9.60306e-16
Potri.008G190600	1.98192	0.023419	-2.00724	-5.4087	9.80122e-06	0.00010415		Potri.012G063800	-2.74165	-2.20537	0.283463	1.03375	1.5803e-17	9.8489e-16
Potri.015G040900	-1.31048	1.69892	-1.7224	-2.63516	9.94031e-06	0.000105507		Potri.006G013900	-2.10725	-3.70714	0.870727	1.88268	2.06939e-17	1.27541e-15
Potri.002G246400	-1.47177	1.86002	-0.286982	-1.62563	1.00353e-05	0.000106305		Potri.015G031400	-4.80821	-0.387628	-2.76312	-3.61029	2.23677e-17	1.37188e-15
Potri.015G128300	0.872766	3.22915	-1.40225	-1.35628	1.01867e-05	0.00010759		Potri.001G140500	4.27818	1.71534	1.81234	0.834729	2.24073e-17	1.37188e-15
Potri.003G126500	-0.161673	1.01989	-0.911804	-1.43204	1.02778e-05	0.000108387		Potri.004G019900	0.91463	-2.55884	-3.1711	-2.89507	2.57252e-17	1.56811e-15
Potri.016G133500	0.133849	-0.73687	1.36504	-0.0634757	1.04658e-05	0.000109954		Potri.012G081800	-5.75694	-1.84566	-1.02134	0.0375499	2.71023e-17	1.64483e-15
Potri.001G324300	0.0348953	1.96808	-0.470254	0.679155	1.06234e-05	0.000111358		Potri.009G151600	-2.64701	-2.3585	0.784166	1.01604	2.89631e-17	1.75013e-15
Potri.017G052300	-1.5976	-2.31636	1.20646	0.230275	1.0766e-05	0.000112683		Potri.010G151400	-1.39282	-0.889145	2.13646	1.43619	3.17213e-17	1.90437e-15
Potri.017G077100	-0.810975	-1.10568	1.67736	-0.687538	1.09046e-05	0.000113877		Potri.005G076000	1.99464	0.915498	-2.46712	-2.02005	3.17953e-17	1.9047e-15
Potri.016G137900	-0.347787	0.230515	2.06805	0.912988	1.09755e-05	0.000114454		Potri.010G141600	-0.132731	2.61422	-1.15892	-3.24406	3.2669e-17	1.95284e-15
Potri.004G162200	0.800075	4.37496	0.483585	-4.3667	1.09763e-05	0.000114454		Potri.017G141900	1.7723	-0.186132	-4.59166	-2.31187	3.34519e-17	1.99534e-15
Potri.003G107400	-1.2209	0.586572	1.05168	0.483518	1.10413e-05	0.000115045		Potri.001G416800	-0.706029	2.05301	-1.30605	-4.54289	3.61976e-17	2.14531e-15
Potri.001G345300	-0.989389	-0.921945	0.558665	1.31641	1.12946e-05	0.000117378		Potri.017G141800	3.34135	1.64058	-5.83823	-0.496146	3.81754e-17	2.24814e-15
Potri.001G261100	1.29988	0.817595	-2.05598	-7.2161	1.17323e-05	0.000121113		Potri.019G128100	-1.05872	0.357018	1.38979	2.60733	3.89613e-17	2.28474e-15
Potri.001G105200	-0.640056	-0.59481	1.04886	0.201787	1.22795e-05	0.000126062		Potri.016G119100	-0.701833	1.98828	-1.02471	-3.86991	4.85619e-17	2.796e-15
Potri.002G234600	-1.38124	1.42029	-0.332962	-2.56913	1.25468e-05	0.000128388		Potri.006G003900	-0.64987	-1.28486	-4.08358	-3.49528	7.41658e-17	4.21577e-15
Potri.016G134600	-1.25275	-1.25615	1.1601	0.292201	1.25498e-05	0.000128388		Potri.004G074300	0.733614	3.03302	4.3369	3.86128	8.29576e-17	4.69631e-15
Potri.011G126900	0.648005	-0.821167	2.74369	-0.90605	1.25522e-05	0.000128388		Potri.007G107600	4.29907	3.78077	0.362267	1.36234	8.7543e-17	4.94582e-15
Potri.001G016900	-1.71939	2.01163	-0.0422736	0.323344	1.25605e-05	0.000128391		Potri.004G035700	-1.70329	-0.696849	3.37021	3.44629	8.91643e-17	5.01703e-15
Potri.012G047800	-1.22911	2.87849	-0.717033	-5.98457	1.25617e-05	0.000128391		Potri.014G172800	-2.76002	-1.03398	0.881934	1.73604	9.76001e-17	5.48059e-15
Potri.005G139400	2.07623	0.732821	0.591555	-0.907305	1.2669e-05	0.000129345		Potri.008G204900	-3.94197	-3.06458	-1.21325	-0.402039	1.03532e-16	5.80195e-15
Potri.017G092000	2.16941	0.264083	0.612876	-0.478813	1.26899e-05	0.000129464		Potri.010G103500	-4.34147	-4.34192	1.34984	-0.736448	1.11187e-16	6.1811e-15
Potri.010G065800	0.579719	1.82352	-0.729543	-0.315379	1.27365e-05	0.000129892		Potri.014G016200	2.60805	-0.288745	-2.41853	-2.50376	1.2593e-16	6.94514e-15
Potri.004G148300	0.367665	0.431906	1.49102	-1.05259	1.28468e-05	0.00013092		Potri.014G095100	-2.21619	-3.59253	1.07762	0.674882	1.64572e-16	8.93446e-15
Potri.002G012900	0.955899	-0.200986	2.7069	-0.222943	1.30468e-05	0.000132717		Potri.003G076900	-5.12757	-2.89214	0.917873	5.37986	1.65923e-16	8.99027e-15
Potri.016G078000	0	5.57132	0	0	1.31488e-05	0.000133608		Potri.019G024600	0.546509	-1.08472	8.87352	10.7925	1.68903e-16	9.12486e-15
Potri.T086200	0	5.57132	0	0	1.31488e-05	0.000133608		Potri.017G138400	0	2.25549	3.36742	7.99461	1.69064e-16	9.12486e-15
Potri.001G115000	1.41553	-0.466479	0.805509	0.844971	1.36706e-05	0.000138004		Potri.005G127800	-3.75112	-4.65656	-3.30849	-0.908677	1.70744e-16	9.19766e-15
Potri.008G162000	1.65199	0.346165	0.497257	-0.187234	1.37021e-05	0.000138178		Potri.007G105300	-2.9993	-2.10433	0.0551988	1.19681	1.77286e-16	9.51318e-15
Potri.001G133200	-2.06526	-1.45915	1.36847	0.116235	1.37991e-05	0.000139026		Potri.018G075000	0.282041	1.5893	-1.55213	-2.02042	1.88387e-16	1.007e-14
Potri.015G056100	0.864837	1.26922	-1.38263	0.39169	1.38473e-05	0.000139383		Potri.013G128800	-5.18335	-2.97458	-0.676226	1.67675	1.9075e-16	1.01768e-14
Potri.006G070900	0.366956	-0.0250562	2.08051	0.368205	1.39583e-05	0.000140399		Potri.013G157000	-4.13748	-1.98354	-0.94933	-2.14971	2.18575e-16	1.15724e-14
Potri.013G030900	0.443125	-0.773105	0.761043	1.58307	1.40072e-05	0.000140738		Potri.008G189400	-5.3703	-2.94715	0.0910508	-1.16543	2.24855e-16	1.18597e-14
Potri.005G244300	1.47467	0.0402594	-0.0454564	0.210702	1.42763e-05	0.000143236		Potri.014G106300	-0.711558	-1.78474	2.84838	4.47728	2.27919e-16	1.19985e-14
Potri.014G117100	0.776253	2.32377	-0.727376	-7.40803	1.43044e-05	0.000143466		Potri.008G190000	-5.73134	-5.44915	-0.225446	1.71179	2.62165e-16	1.37493e-14
Potri.008G198000	0.541771	0.714892	1.71403	0.00129922	1.43162e-05	0.000143533		Potri.001G347300	-4.12521	-4.7815	0.933237	1.81692	2.75936e-16	1.43901e-14
Potri.017G120600	5.37975	0	0	0	1.43569e-05	0.000143786		Potri.005G070700	-4.30423	-2.26219	-1.67153	-0.270245	2.93937e-16	1.51582e-14
Potri.015G046900	-1.19448	2.27499	-0.16773	-1.61408	1.44416e-05	0.00014453		Potri.007G019300	-1.05967	1.52071	-0.626619	-3.55937	3.1467e-16	1.61079e-14
Potri.018G047300	-0.250991	-0.0465822	2.79231	-0.31244	1.44759e-05	0.000144821		Potri.004G085600	-1.9074	-0.834167	1.94491	1.32684	3.403e-16	1.73241e-14
Potri.007G044700	1.04342	-0.128719	-0.402139	-5.40467	1.44985e-05	0.000144996		Potri.009G019800	3.50982	1.46419	0.144391	1.11081	3.41255e-16	1.7341e-14
Potri.016G033100	0.644055	1.70061	0.866021	-1.58648	1.45178e-05	0.000145137		Potri.016G102900	2.07272	-0.802152	-1.48937	-1.0818	3.61545e-16	1.83385e-14
Potri.008G117600	-0.282839	-0.925547	1.03306	0.58948	1.46536e-05	0.000146398		Potri.019G114900	-4.4646	-3.48369	-1.90064	-0.910523	4.34859e-16	2.18578e-14
Potri.001G037700	0.381453	2.60499	0.158461	-3.02821	1.46545e-05	0.000146398		Potri.010G152000	-8.58261	-5.29858	0.979395	2.729	5.43676e-16	2.7034e-14
Potri.002G167100	0.229207	-0.656076	1.48724	0.957975	1.5296e-05	0.000152097		Potri.017G141400	1.78301	2.54904	-0.256775	-1.26887	5.5954e-16	2.77731e-14
Potri.012G094400	-1.13451	-1.27996	2.00122	0.986005	1.54193e-05	0.00015316		Potri.002G130700	1.29026	0.668933	-1.72885	-2.06643	5.67621e-16	2.81241e-14
Potri.001G145700	1.5625	0.178889	-0.0747279	0.129661	1.56326e-05	0.000154947		Potri.007G093000	-1.58603	-0.912312	1.22143	2.01106	5.94451e-16	2.93488e-14
Potri.004G135700	1.54001	0.509534	-2.20454	0.461314	1.56446e-05	0.000155011		Potri.001G124400	-6.86565	-2.88667	0.607451	2.00068	6.42032e-16	3.15299e-14
Potri.004G105900	-4.6752	1.76255	0.46427	-4.6752	1.57676e-05	0.000155952		Potri.006G005600	-0.617704	2.50215	-1.24971	-2.99768	7.67945e-16	3.74488e-14
Potri.009G058800	-0.790574	1.97862	-0.371035	-5.01627	1.58417e-05	0.000156579		Potri.002G122900	-0.260141	-3.53918	-4.96145	-1.86617	7.94197e-16	3.85262e-14
Potri.009G100200	0.11872	-0.204159	1.36372	-0.455478	1.58678e-05	0.000156776		Potri.018G103900	-0.604168	2.19936	-1.18692	-2.9526	8.92367e-16	4.30629e-14
Potri.004G050000	-3.70365	2.69254	0.243574	0.971321	1.59293e-05	0.000157272		Potri.015G079000	-4.08465	-1.39164	-1.74201	-0.82787	1.17093e-15	5.55412e-14
Potri.013G160500	1.7289	0.37132	0.580873	0.382427	1.59582e-05	0.000157502		Potri.018G105200	-2.60308	-1.48962	1.40197	0.900526	1.23691e-15	5.84712e-14
Potri.017G098700	0.409662	1.04956	-0.00982836	-3.94252	1.60663e-05	0.0001584		Potri.005G051800	2.91551	1.63291	-2.28372	-0.284974	1.2781e-15	6.01117e-14
Potri.010G250600	1.23171	0.788113	0.0773213	-1.27834	1.61242e-05	0.000158746		Potri.016G126700	2.1449	1.57488	0.115982	-1.40561	1.30108e-15	6.10891e-14
Potri.008G155900	-0.166174	4.04473	0.641406	-1.09864	1.61856e-05	0.000159295		Potri.006G087500	1.18662	2.76783	0.465918	-3.53234	1.31026e-15	6.14166e-14
Potri.001G043600	-1.84699	2.1884	0.247917	-0.885255	1.64549e-05	0.000161432		Potri.013G143900	-2.53726	0.111518	1.7029	2.845	1.31728e-15	6.16414e-14
Potri.002G023900	0.488849	1.8599	-0.135838	-3.31362	1.67324e-05	0.000163866		Potri.014G029100	-3.20642	-4.09815	-0.956202	-1.22915	2.06235e-15	9.42845e-14
Potri.005G237700	1.47606	0.428945	0.313573	-1.90373	1.6947e-05	0.000165677		Potri.001G156300	3.77987	2.00495	0.810153	1.74196	2.49046e-15	1.13113e-13
Potri.004G124500	1.78276	0.23246	0.825488	0.267689	1.73433e-05	0.000169017		Potri.008G114700	2.10023	7.30373	0	2.43799	2.85872e-15	1.28786e-13
Potri.017G101000	1.24999	0.0697599	-0.67812	0.312463	1.73545e-05	0.000169067		Potri.015G003100	-1.01468	0.632826	2.16504	2.4643	3.29309e-15	1.47399e-13
Potri.T153200	1.37342	0.087555	-0.977835	0.633499	1.78179e-05	0.000173097		Potri.010G044400	-0.742989	-1.36406	1.03726	2.09237	3.31311e-15	1.48057e-13
Potri.004G148400	-0.062649	-0.938113	1.47149	-0.103824	1.78823e-05	0.000173541		Potri.019G131000	-0.771792	-2.62526	-3.00554	-3.28554	3.96613e-15	1.75266e-13
Potri.008G148200	-0.657036	2.07076	-0.0642485	-2.50031	1.81506e-05	0.000175778		Potri.019G063100	-3.21235	-2.37267	-0.174536	-1.05242	4.42347e-15	1.94549e-13
Potri.018G054900	1.60892	0.714805	-0.361467	-0.406872	1.81993e-05	0.000176127		Potri.001G138300	0.068229	1.71301	3.50756	3.48945	4.90147e-15	2.14553e-13
Potri.001G327500	0.256151	-1.99518	-2.09838	2.3388	1.85263e-05	0.000178857		Potri.010G193100	-0.935044	2.73412	-1.41819	-4.9565	5.11654e-15	2.23523e-13
Potri.008G026000	2.33774	-0.72332	0.332232	0.562619	1.85633e-05	0.000179145		Potri.004G173300	-3.64316	-3.47236	-0.138769	2.45678	6.02398e-15	2.61595e-13
Potri.016G065900	-0.79609	-1.06769	1.14991	0.115164	1.88146e-05	0.000181325		Potri.004G155400	-3.72365	0.160746	-1.53284	-4.00413	6.23991e-15	2.69743e-13
Potri.005G110400	0	5.49202	0	0	1.88958e-05	0.000181982		Potri.017G084100	-2.45059	-1.43116	0.611014	1.16189	6.58554e-15	2.83801e-13
Potri.001G188700	-0.481115	-1.83301	1.1194	-0.800561	1.91677e-05	0.000184282		Potri.005G060700	-3.60233	-1.9296	0.829603	1.68552	7.20702e-15	3.08669e-13
[truncated: 4,229 more rows]

## Sheet: Table S3
Table S3 GO term and KEGG analysis of JA and SA responsive genes.
JA responsive genes									SA responsive genes
Term	ID	Description	Gene Ratio	Backgroud Ratio	p-value	FDR	Count		Term	ID	Description	Gene Ratio	Backgroud Ratio	p-value	FDR	Count
GO-BP	GO:0009611	response to wounding	123/2302	335/20450	8.88256e-35	1.39012e-31	123		GO-BP	GO:0009611	response to wounding	125/3406	335/20450	4.4062e-20	7.1072e-17	125
	GO:0009753	response to jasmonic acid	133/2302	474/20450	2.59577e-24	2.03119e-21	133			GO:0015979	photosynthesis	121/3406	344/20450	3.83405e-17	3.09216e-14	121
	GO:0010200	response to chitin	117/2302	421/20450	3.80462e-21	1.98474e-18	117			GO:0010200	response to chitin	139/3406	421/20450	8.3746e-17	4.50274e-14	139
	GO:0010243	response to organonitrogen compound	119/2302	443/20450	3.58643e-20	1.40319e-17	119			GO:0010243	response to organonitrogen compound	141/3406	443/20450	1.55434e-15	6.2679e-13	141
	GO:0006979	response to oxidative stress	123/2302	485/20450	1.34762e-18	4.21804e-16	123			GO:0009414	response to water deprivation	133/3406	418/20450	1.02408e-14	3.30369e-12	133
	GO:0009694	jasmonic acid metabolic process	60/2302	158/20450	1.92593e-18	5.02347e-16	60			GO:0005982	starch metabolic process	87/3406	233/20450	2.03989e-14	5.03805e-12	87
	GO:0009642	response to light intensity	84/2302	283/20450	2.0709e-17	4.62994e-15	84			GO:0009415	response to water	134/3406	426/20450	2.18638e-14	5.03805e-12	134
	GO:0009414	response to water deprivation	106/2302	418/20450	3.41467e-16	6.67994e-14	106			GO:0009658	chloroplast organization	87/3406	235/20450	3.6257e-14	7.31031e-12	87
	GO:0009415	response to water	107/2302	426/20450	5.04541e-16	8.77341e-14	107			GO:0009657	plastid organization	124/3406	387/20450	4.67575e-14	8.37999e-12	124
	GO:0009695	jasmonic acid biosynthetic process	51/2302	135/20450	8.86354e-16	1.38714e-13	51			GO:0009753	response to jasmonic acid	144/3406	474/20450	5.32241e-14	8.58504e-12	144
	GO:0009636	response to toxic substance	105/2302	429/20450	6.14923e-15	8.74868e-13	105			GO:0009698	phenylpropanoid metabolic process	72/3406	183/20450	1.74779e-13	2.5629e-11	72
	GO:0009644	response to high light intensity	68/2302	224/20450	6.84218e-15	8.92335e-13	68			GO:0009642	response to light intensity	97/3406	283/20450	3.11466e-13	4.18662e-11	97
	GO:0042542	response to hydrogen peroxide	62/2302	194/20450	7.58328e-15	9.12911e-13	62			GO:0019682	glyceraldehyde-3-phosphate metabolic process	109/3406	335/20450	5.28932e-13	6.56283e-11	109
	GO:0000302	response to reactive oxygen species	82/2302	318/20450	3.00577e-13	3.36002e-11	82			GO:0044550	secondary metabolite biosynthetic process	104/3406	316/20450	8.11441e-13	9.09039e-11	104
	GO:0035556	intracellular signal transduction	111/2302	495/20450	5.62518e-13	5.86894e-11	111			GO:0006979	response to oxidative stress	143/3406	485/20450	8.45355e-13	9.09039e-11	143
	GO:0009723	response to ethylene	87/2302	353/20450	8.76777e-13	8.57598e-11	87			GO:0033692	cellular polysaccharide biosynthetic process	142/3406	481/20450	9.15147e-13	9.22583e-11	142
	GO:0009698	phenylpropanoid metabolic process	56/2302	183/20450	1.13299e-12	1.04301e-10	56			GO:0042546	cell wall biogenesis	110/3406	345/20450	1.79701e-12	1.70505e-10	110
	GO:0080167	response to karrikin	44/2302	128/20450	3.72028e-12	3.23457e-10	44			GO:0035556	intracellular signal transduction	144/3406	495/20450	2.16377e-12	1.93897e-10	144
	GO:0009751	response to salicylic acid	104/2302	473/20450	1.07543e-11	8.85811e-10	104			GO:0019684	photosynthesis, light reaction	92/3406	271/20450	2.35663e-12	2.00065e-10	92
	GO:0042440	pigment metabolic process	83/2302	346/20450	1.32761e-11	1.03885e-09	83			GO:0042440	pigment metabolic process	109/3406	346/20450	5.27751e-12	4.11851e-10	109
	GO:0009408	response to heat	74/2302	298/20450	3.02254e-11	2.25251e-09	74			GO:0009069	serine family amino acid metabolic process	87/3406	254/20450	5.36197e-12	4.11851e-10	87
	GO:0044550	secondary metabolite biosynthetic process	77/2302	316/20450	3.2441e-11	2.30774e-09	77			GO:0008652	cellular amino acid biosynthetic process	133/3406	453/20450	7.43717e-12	5.45279e-10	133
	GO:0071396	cellular response to lipid	87/2302	381/20450	6.87019e-11	4.67472e-09	87			GO:0006073	cellular glucan metabolic process	116/3406	380/20450	1.08688e-11	7.30472e-10	116
	GO:0009867	jasmonic acid mediated signaling pathway	71/2302	286/20450	7.67874e-11	4.80689e-09	71			GO:0044042	glucan metabolic process	116/3406	380/20450	1.08688e-11	7.30472e-10	116
	GO:0071395	cellular response to jasmonic acid stimulus	71/2302	286/20450	7.67874e-11	4.80689e-09	71			GO:0019252	starch biosynthetic process	70/3406	190/20450	1.44475e-11	9.32152e-10	70
	GO:0002682	regulation of immune system process	92/2302	424/20450	3.49998e-10	2.10672e-08	92			GO:0006081	cellular aldehyde metabolic process	127/3406	431/20450	1.69054e-11	1.04878e-09	127
	GO:0045088	regulation of innate immune response	91/2302	419/20450	4.14768e-10	2.40198e-08	91			GO:0009699	phenylpropanoid biosynthetic process	56/3406	139/20450	2.75365e-11	1.64505e-09	56
	GO:0046148	pigment biosynthetic process	66/2302	267/20450	4.29746e-10	2.40198e-08	66			GO:0019344	cysteine biosynthetic process	73/3406	205/20450	3.44625e-11	1.92485e-09	73
	GO:0044106	cellular amine metabolic process	48/2302	167/20450	5.01534e-10	2.70655e-08	48			GO:0009070	serine family amino acid biosynthetic process	74/3406	209/20450	3.46067e-11	1.92485e-09	74
	GO:0050776	regulation of immune response	91/2302	421/20450	5.37161e-10	2.80219e-08	91			GO:0046148	pigment biosynthetic process	88/3406	267/20450	4.22219e-11	2.27013e-09	88
	GO:0071215	cellular response to abscisic acid stimulus	65/2302	263/20450	5.86129e-10	2.86654e-08	65			GO:0044093	positive regulation of molecular function	50/3406	119/20450	5.17455e-11	2.69243e-09	50
	GO:0097306	cellular response to alcohol	65/2302	263/20450	5.86129e-10	2.86654e-08	65			GO:0042742	defense response to bacterium	118/3406	398/20450	5.75001e-11	2.83532e-09	118
	GO:0009738	abscisic acid-activated signaling pathway	62/2302	248/20450	8.91247e-10	4.22667e-08	62			GO:0006534	cysteine metabolic process	73/3406	207/20450	5.80072e-11	2.83532e-09	73
	GO:0009692	ethylene metabolic process	38/2302	119/20450	1.21477e-09	4.87466e-08	38			GO:0006090	pyruvate metabolic process	122/3406	417/20450	7.03115e-11	3.33566e-09	122
	GO:0009693	ethylene biosynthetic process	38/2302	119/20450	1.21477e-09	4.87466e-08	38			GO:0009240	isopentenyl diphosphate biosynthetic process	79/3406	233/20450	8.82545e-11	3.92208e-09	79
	GO:0043449	cellular alkene metabolic process	38/2302	119/20450	1.21477e-09	4.87466e-08	38			GO:0046490	isopentenyl diphosphate metabolic process	79/3406	233/20450	8.82545e-11	3.92208e-09	79
	GO:0043450	alkene biosynthetic process	38/2302	119/20450	1.21477e-09	4.87466e-08	38			GO:0019288	isopentenyl diphosphate biosynthetic process, methylerythritol 4-phosphate pathway	78/3406	229/20450	9.02142e-11	3.92208e-09	78
	GO:1900673	olefin metabolic process	38/2302	119/20450	1.21477e-09	4.87466e-08	38			GO:0043085	positive regulation of catalytic activity	49/3406	117/20450	9.23986e-11	3.92208e-09	49
	GO:1900674	olefin biosynthetic process	38/2302	119/20450	1.21477e-09	4.87466e-08	38			GO:0006720	isoprenoid metabolic process	139/3406	496/20450	9.57271e-11	3.94521e-09	139
	GO:0046686	response to cadmium ion	97/2302	468/20450	1.54266e-09	6.03566e-08	97			GO:0009627	systemic acquired resistance	128/3406	446/20450	9.78353e-11	3.94521e-09	128
	GO:0006576	cellular biogenic amine metabolic process	45/2302	157/20450	1.90463e-09	7.27011e-08	45			GO:0010073	meristem maintenance	91/3406	285/20450	1.34167e-10	5.27831e-09	91
	GO:0002679	respiratory burst involved in defense response	38/2302	121/20450	2.06402e-09	7.51209e-08	38			GO:0009644	response to high light intensity	76/3406	224/20450	1.9266e-10	7.39905e-09	76
	GO:0045730	respiratory burst	38/2302	121/20450	2.06402e-09	7.51209e-08	38			GO:0000302	response to reactive oxygen species	97/3406	318/20450	5.49704e-10	2.06203e-08	97
	GO:0006972	hyperosmotic response	61/2302	250/20450	3.34182e-09	1.18862e-07	61			GO:0044272	sulfur compound biosynthetic process	132/3406	477/20450	6.96372e-10	2.55284e-08	132
	GO:0009699	phenylpropanoid biosynthetic process	41/2302	139/20450	3.90573e-09	1.35833e-07	41			GO:0009408	response to heat	92/3406	298/20450	7.65762e-10	2.74483e-08	92
	GO:0008219	cell death	100/2302	496/20450	4.01688e-09	1.36661e-07	100			GO:0006733	oxidoreduction coenzyme metabolic process	120/3406	425/20450	1.11747e-09	3.85185e-08	120
	GO:0009805	coumarin biosynthetic process	23/2302	54/20450	4.54736e-09	1.51417e-07	23			GO:0008299	isoprenoid biosynthetic process	130/3406	471/20450	1.12236e-09	3.85185e-08	130
	GO:0009308	amine metabolic process	57/2302	229/20450	4.99187e-09	1.62756e-07	57			GO:0009751	response to salicylic acid	130/3406	473/20450	1.50199e-09	5.0295e-08	130
	GO:0009804	coumarin metabolic process	23/2302	55/20450	6.98512e-09	2.23096e-07	23			GO:0000023	maltose metabolic process	56/3406	152/20450	1.52787e-09	5.0295e-08	56
	GO:0009310	amine catabolic process	36/2302	117/20450	9.98215e-09	3.06315e-07	36			GO:0009834	plant-type secondary cell wall biogenesis	28/3406	53/20450	1.71816e-09	5.54278e-08	28
	GO:0042402	cellular biogenic amine catabolic process	36/2302	117/20450	9.98215e-09	3.06315e-07	36			GO:0009694	jasmonic acid metabolic process	57/3406	158/20450	2.71443e-09	8.58503e-08	57
	GO:0009626	plant-type hypersensitive response	84/2302	400/20450	1.02182e-08	3.07527e-07	84			GO:0009695	jasmonic acid biosynthetic process	51/3406	135/20450	2.99396e-09	9.28704e-08	51
	GO:0000160	phosphorelay signal transduction system	40/2302	138/20450	1.04474e-08	3.08493e-07	40			GO:0010583	response to cyclopentenone	54/3406	147/20450	3.35603e-09	1.02137e-07	54
	GO:0009627	systemic acquired resistance	91/2302	446/20450	1.10101e-08	3.19089e-07	91			GO:0050790	regulation of catalytic activity	67/3406	201/20450	5.09851e-09	1.52294e-07	67
	GO:0034050	host programmed cell death induced by symbiont	84/2302	401/20450	1.15265e-08	3.27982e-07	84			GO:0005984	disaccharide metabolic process	65/3406	193/20450	5.40556e-09	1.5853e-07	65
	GO:0034976	response to endoplasmic reticulum stress	77/2302	357/20450	1.25187e-08	3.49853e-07	77			GO:0065009	regulation of molecular function	78/3406	248/20450	5.84362e-09	1.68317e-07	78
	GO:0044275	cellular carbohydrate catabolic process	15/2302	26/20450	1.29779e-08	3.56324e-07	15			GO:0046496	nicotinamide nucleotide metabolic process	106/3406	372/20450	6.03924e-09	1.709e-07	106
	GO:0012501	programmed cell death	91/2302	448/20450	1.37952e-08	3.72232e-07	91			GO:0050832	defense response to fungus	101/3406	350/20450	6.67327e-09	1.85586e-07	101
	GO:0042742	defense response to bacterium	83/2302	398/20450	1.73955e-08	4.61424e-07	83			GO:0002682	regulation of immune system process	117/3406	424/20450	7.68235e-09	2.10028e-07	117
	GO:0072657	protein localization to membrane	79/2302	377/20450	3.07487e-08	7.88881e-07	79			GO:0009311	oligosaccharide metabolic process	69/3406	212/20450	9.22371e-09	2.44241e-07	69
	GO:0090150	establishment of protein localization to membrane	79/2302	377/20450	3.07487e-08	7.88881e-07	79			GO:0016072	rRNA metabolic process	77/3406	246/20450	9.23665e-09	2.44241e-07	77
	GO:0010363	regulation of plant-type hypersensitive response	78/2302	371/20450	3.23663e-08	8.16988e-07	78			GO:0019725	cellular homeostasis	67/3406	204/20450	1.00134e-08	2.6051e-07	67
	GO:0010941	regulation of cell death	83/2302	404/20450	3.51054e-08	8.72063e-07	83			GO:0019362	pyridine nucleotide metabolic process	106/3406	376/20450	1.13031e-08	2.89395e-07	106
	GO:0010264	myo-inositol hexakisphosphate biosynthetic process	24/2302	65/20450	5.99228e-08	1.44276e-06	24			GO:0006364	rRNA processing	76/3406	243/20450	1.19525e-08	3.01241e-07	76
	GO:0033517	myo-inositol hexakisphosphate metabolic process	24/2302	65/20450	5.99228e-08	1.44276e-06	24			GO:0034470	ncRNA processing	84/3406	278/20450	1.25285e-08	3.09132e-07	84
	GO:0043067	regulation of programmed cell death	81/2302	396/20450	6.24194e-08	1.4801e-06	81			GO:0044036	cell wall macromolecule metabolic process	91/3406	309/20450	1.26489e-08	3.09132e-07	91
	GO:0005982	starch metabolic process	55/2302	233/20450	6.52985e-08	1.52526e-06	55			GO:0002679	respiratory burst involved in defense response	46/3406	121/20450	1.39081e-08	3.29908e-07	46
	GO:0009873	ethylene-activated signaling pathway	36/2302	125/20450	6.70159e-08	1.54235e-06	36			GO:0045730	respiratory burst	46/3406	121/20450	1.39081e-08	3.29908e-07	46
	GO:0046173	polyol biosynthetic process	25/2302	70/20450	6.86955e-08	1.55809e-06	25			GO:0045088	regulation of innate immune response	115/3406	419/20450	1.42765e-08	3.33738e-07	115
	GO:0032958	inositol phosphate biosynthetic process	24/2302	66/20450	8.41593e-08	1.88156e-06	24			GO:0010016	shoot system morphogenesis	126/3406	471/20450	1.54956e-08	3.57063e-07	126
	GO:0007623	circadian rhythm	44/2302	171/20450	9.76007e-08	2.12146e-06	44			GO:0009636	response to toxic substance	117/3406	429/20450	1.57936e-08	3.58803e-07	117
	GO:0048511	rhythmic process	44/2302	171/20450	9.76007e-08	2.12146e-06	44			GO:0009832	plant-type cell wall biogenesis	58/3406	169/20450	1.63361e-08	3.65975e-07	58
	GO:0006612	protein targeting to membrane	77/2302	374/20450	9.91476e-08	2.12556e-06	77			GO:0009902	chloroplast relocation	41/3406	103/20450	1.80943e-08	3.94408e-07	41
	GO:0016052	carbohydrate catabolic process	71/2302	336/20450	1.07546e-07	2.27445e-06	71			GO:0051667	establishment of plastid localization	41/3406	103/20450	1.80943e-08	3.94408e-07	41
	GO:0080135	regulation of cellular response to stress	78/2302	385/20450	1.64835e-07	3.43956e-06	78			GO:0006739	NADP metabolic process	62/3406	186/20450	1.87552e-08	3.98054e-07	62
	GO:0009743	response to carbohydrate	80/2302	401/20450	2.24857e-07	4.63029e-06	80			GO:0045491	xylan metabolic process	62/3406	186/20450	1.87552e-08	3.98054e-07	62
	GO:0071236	cellular response to antibiotic	74/2302	364/20450	2.94758e-07	5.96098e-06	74			GO:0050776	regulation of immune response	115/3406	421/20450	1.90194e-08	3.98419e-07	115
	GO:0009072	aromatic amino acid family metabolic process	53/2302	231/20450	2.97097e-07	5.96098e-06	53			GO:0051656	establishment of organelle localization	42/3406	107/20450	1.97691e-08	4.08815e-07	42
	GO:0009812	flavonoid metabolic process	55/2302	244/20450	3.30374e-07	6.54475e-06	55			GO:0034976	response to endoplasmic reticulum stress	101/3406	357/20450	2.04398e-08	4.17334e-07	101
	GO:0042538	hyperosmotic salinity response	41/2302	161/20450	3.55368e-07	6.95188e-06	41			GO:0009867	jasmonic acid mediated signaling pathway	85/3406	286/20450	2.38798e-08	4.65211e-07	85
	GO:0071446	cellular response to salicylic acid stimulus	72/2302	355/20450	4.66268e-07	9.00875e-06	72			GO:0071395	cellular response to jasmonic acid stimulus	85/3406	286/20450	2.38798e-08	4.65211e-07	85
	GO:0050832	defense response to fungus	71/2302	350/20450	5.5445e-07	1.0472e-05	71			GO:0071396	cellular response to lipid	106/3406	381/20450	2.41735e-08	4.65211e-07	106
	GO:0009813	flavonoid biosynthetic process	50/2302	217/20450	5.55384e-07	1.0472e-05	50			GO:0010383	cell wall polysaccharide metabolic process	74/3406	238/20450	2.43614e-08	4.65211e-07	74
	GO:0006090	pyruvate metabolic process	81/2302	417/20450	5.96008e-07	1.11042e-05	81			GO:0035266	meristem growth	60/3406	179/20450	2.50904e-08	4.65211e-07	60
	GO:0009451	RNA modification	67/2302	325/20450	6.26364e-07	1.15325e-05	67			GO:0009595	detection of biotic stimulus	41/3406	104/20450	2.5092e-08	4.65211e-07	41
	GO:0015994	chlorophyll metabolic process	45/2302	189/20450	7.67565e-07	1.39679e-05	45			GO:0019750	chloroplast localization	41/3406	104/20450	2.5092e-08	4.65211e-07	41
	GO:0006073	cellular glucan metabolic process	75/2302	380/20450	8.19419e-07	1.45726e-05	75			GO:0051644	plastid localization	41/3406	104/20450	2.5092e-08	4.65211e-07	41
	GO:0044042	glucan metabolic process	75/2302	380/20450	8.19419e-07	1.45726e-05	75			GO:0009626	plant-type hypersensitive response	110/3406	400/20450	2.61345e-08	4.78995e-07	110
	GO:0072593	reactive oxygen species metabolic process	74/2302	374/20450	8.77089e-07	1.5423e-05	74			GO:0010075	regulation of meristem growth	58/3406	171/20450	2.64294e-08	4.78995e-07	58
	GO:0043647	inositol phosphate metabolic process	27/2302	89/20450	9.23804e-07	1.60639e-05	27			GO:0000096	sulfur amino acid metabolic process	96/3406	336/20450	2.68413e-08	4.81056e-07	96
	GO:0006457	protein folding	61/2302	290/20450	9.7183e-07	1.67133e-05	61			GO:1901607	alpha-amino acid biosynthetic process	106/3406	382/20450	2.80573e-08	4.97323e-07	106
	GO:0006066	alcohol metabolic process	43/2302	180/20450	1.21722e-06	2.0706e-05	43			GO:0034050	host programmed cell death induced by symbiont	110/3406	401/20450	3.02002e-08	5.29489e-07	110
	GO:0006598	polyamine catabolic process	16/2302	38/20450	1.23386e-06	2.07634e-05	16			GO:2000377	regulation of reactive oxygen species metabolic process	66/3406	205/20450	3.08939e-08	5.35826e-07	66
	GO:2000377	regulation of reactive oxygen species metabolic process	47/2302	205/20450	1.39239e-06	2.31818e-05	47			GO:0072524	pyridine-containing compound metabolic process	106/3406	383/20450	3.25325e-08	5.58245e-07	106
	GO:0005984	disaccharide metabolic process	45/2302	193/20450	1.42169e-06	2.34204e-05	45			GO:0009250	glucan biosynthetic process	85/3406	288/20450	3.38631e-08	5.7496e-07	85
	GO:0009863	salicylic acid mediated signaling pathway	70/2302	353/20450	1.57845e-06	2.52317e-05	70			GO:0009637	response to blue light	47/3406	128/20450	3.46259e-08	5.81787e-07	47
	GO:0009311	oligosaccharide metabolic process	48/2302	212/20450	1.58e-06	2.52317e-05	48			GO:0051606	detection of stimulus	51/3406	144/20450	3.66362e-08	6.05943e-07	51
	GO:0034285	response to disaccharide	48/2302	212/20450	1.58e-06	2.52317e-05	48			GO:0015994	chlorophyll metabolic process	62/3406	189/20450	3.68149e-08	6.05943e-07	62
	GO:0006833	water transport	36/2302	141/20450	1.68086e-06	2.63054e-05	36			GO:0042542	response to hydrogen peroxide	63/3406	194/20450	4.39272e-08	7.11163e-07	63
	GO:0042044	fluid transport	36/2302	141/20450	1.68086e-06	2.63054e-05	36			GO:0071215	cellular response to abscisic acid stimulus	79/3406	263/20450	4.45304e-08	7.11163e-07	79
	GO:0006778	porphyrin-containing compound metabolic process	49/2302	219/20450	1.77641e-06	2.75255e-05	49			GO:0097306	cellular response to alcohol	79/3406	263/20450	4.45304e-08	7.11163e-07	79
	GO:0033013	tetrapyrrole metabolic process	49/2302	220/20450	2.03942e-06	3.12912e-05	49			GO:0010103	stomatal complex morphogenesis	52/3406	149/20450	4.72413e-08	7.47061e-07	52
	GO:0035690	cellular response to drug	75/2302	390/20450	2.27101e-06	3.45062e-05	75			GO:0010413	glucuronoxylan metabolic process	60/3406	182/20450	4.96408e-08	7.77384e-07	60
	GO:0009744	response to sucrose	47/2302	210/20450	2.83687e-06	4.25789e-05	47			GO:0006220	pyrimidine nucleotide metabolic process	48/3406	134/20450	6.09435e-08	9.34386e-07	48
	GO:0071369	cellular response to ethylene stimulus	36/2302	144/20450	2.85673e-06	4.25789e-05	36			GO:0006221	pyrimidine nucleotide biosynthetic process	48/3406	134/20450	6.09435e-08	9.34386e-07	48
	GO:0005983	starch catabolic process	10/2302	17/20450	2.94815e-06	4.27208e-05	10			GO:0072528	pyrimidine-containing compound biosynthetic process	50/3406	142/20450	6.14473e-08	9.34386e-07	50
	GO:0009251	glucan catabolic process	10/2302	17/20450	2.94815e-06	4.27208e-05	10			GO:0045492	xylan biosynthetic process	60/3406	183/20450	6.19835e-08	9.34386e-07	60
	GO:0044247	cellular polysaccharide catabolic process	10/2302	17/20450	2.94815e-06	4.27208e-05	10			GO:0010374	stomatal complex development	69/3406	222/20450	7.24862e-08	1.08259e-06	69
	GO:0046165	alcohol biosynthetic process	32/2302	122/20450	3.34792e-06	4.80688e-05	32			GO:0000097	sulfur amino acid biosynthetic process	86/3406	298/20450	8.59197e-08	1.27145e-06	86
	GO:0042743	hydrogen peroxide metabolic process	66/2302	334/20450	3.51082e-06	4.99493e-05	66			GO:0006778	porphyrin-containing compound metabolic process	68/3406	219/20450	9.3749e-08	1.3747e-06	68
	GO:0009767	photosynthetic electron transport chain	21/2302	64/20450	3.67135e-06	5.14318e-05	21			GO:0072657	protein localization to membrane	103/3406	377/20450	1.02284e-07	1.46096e-06	103
	GO:0006636	unsaturated fatty acid biosynthetic process	22/2302	69/20450	3.71361e-06	5.14318e-05	22			GO:0090150	establishment of protein localization to membrane	103/3406	377/20450	1.02284e-07	1.46096e-06	103
	GO:0033559	unsaturated fatty acid metabolic process	22/2302	69/20450	3.71361e-06	5.14318e-05	22			GO:0006972	hyperosmotic response	75/3406	250/20450	1.02349e-07	1.46096e-06	75
	GO:0009108	coenzyme biosynthetic process	67/2302	342/20450	4.03856e-06	5.54417e-05	67			GO:0008219	cell death	128/3406	496/20450	1.13103e-07	1.59693e-06	128
	GO:0009746	response to hexose	40/2302	170/20450	4.20961e-06	5.69999e-05	40			GO:0033013	tetrapyrrole metabolic process	68/3406	220/20450	1.13854e-07	1.59693e-06	68
	GO:0006857	oligopeptide transport	30/2302	112/20450	4.22491e-06	5.69999e-05	30			GO:0010310	regulation of hydrogen peroxide metabolic process	60/3406	186/20450	1.18793e-07	1.65184e-06	60
	GO:0009733	response to auxin	79/2302	424/20450	4.32222e-06	5.78143e-05	79			GO:0006098	pentose-phosphate shunt	59/3406	182/20450	1.24383e-07	1.70025e-06	59
	GO:0051193	regulation of cofactor metabolic process	46/2302	208/20450	5.05314e-06	6.70184e-05	46			GO:0051156	glucose 6-phosphate metabolic process	59/3406	182/20450	1.24383e-07	1.70025e-06	59
	GO:0009739	response to gibberellin	39/2302	166/20450	5.73507e-06	7.50512e-05	39			GO:0015995	chlorophyll biosynthetic process	45/3406	125/20450	1.31666e-07	1.7791e-06	45
	GO:0010118	stomatal movement	27/2302	97/20450	5.75472e-06	7.50512e-05	27			GO:0009218	pyrimidine ribonucleotide metabolic process	47/3406	133/20450	1.3346e-07	1.7791e-06	47
	GO:0019751	polyol metabolic process	30/2302	114/20450	6.23168e-06	7.93998e-05	30			GO:0009220	pyrimidine ribonucleotide biosynthetic process	47/3406	133/20450	1.3346e-07	1.7791e-06	47
	GO:0009260	ribonucleotide biosynthetic process	68/2302	353/20450	6.24037e-06	7.93998e-05	68			GO:0009165	nucleotide biosynthetic process	118/3406	450/20450	1.41714e-07	1.87365e-06	118
	GO:0046390	ribose phosphate biosynthetic process	68/2302	353/20450	6.24037e-06	7.93998e-05	68			GO:0055082	cellular chemical homeostasis	60/3406	187/20450	1.46807e-07	1.9252e-06	60
	GO:0016999	antibiotic metabolic process	85/2302	470/20450	6.39258e-06	8.06806e-05	85			GO:1901293	nucleoside phosphate biosynthetic process	118/3406	451/20450	1.60948e-07	2.09363e-06	118
	GO:0010310	regulation of hydrogen peroxide metabolic process	42/2302	186/20450	7.41576e-06	9.28453e-05	42			GO:0080135	regulation of cellular response to stress	104/3406	385/20450	1.63465e-07	2.09393e-06	104
	GO:0034284	response to monosaccharide	40/2302	174/20450	7.68379e-06	9.54376e-05	40			GO:0010363	regulation of plant-type hypersensitive response	101/3406	371/20450	1.63568e-07	2.09393e-06	101
	GO:0006733	oxidoreduction coenzyme metabolic process	78/2302	425/20450	8.78203e-06	0.000108219	78			GO:0007623	circadian rhythm	56/3406	171/20450	1.75786e-07	2.21517e-06	56
	GO:0009612	response to mechanical stimulus	20/2302	63/20450	1.09227e-05	0.000133547	20			GO:0048511	rhythmic process	56/3406	171/20450	1.75786e-07	2.21517e-06	56
	GO:0009165	nucleotide biosynthetic process	81/2302	450/20450	1.25062e-05	0.000150721	81			GO:0009723	response to ethylene	97/3406	353/20450	1.77765e-07	2.22275e-06	97
	GO:0048585	negative regulation of response to stimulus	69/2302	367/20450	1.252e-05	0.000150721	69			GO:0010410	hemicellulose metabolic process	63/3406	201/20450	1.88051e-07	2.33328e-06	63
	GO:0019252	starch biosynthetic process	42/2302	190/20450	1.2912e-05	0.00015373	42			GO:0012501	programmed cell death	117/3406	448/20450	2.01272e-07	2.47826e-06	117
	GO:0048878	chemical homeostasis	56/2302	280/20450	1.29663e-05	0.00015373	56			GO:0006612	protein targeting to membrane	101/3406	374/20450	2.48823e-07	3.04055e-06	101
	GO:1901293	nucleoside phosphate biosynthetic process	81/2302	451/20450	1.3596e-05	0.000159983	81			GO:0034660	ncRNA metabolic process	97/3406	357/20450	3.14634e-07	3.71413e-06	97
	GO:0072522	purine-containing compound biosynthetic process	53/2302	261/20450	1.40187e-05	0.000163725	53			GO:0044038	cell wall macromolecule biosynthetic process	61/3406	195/20450	3.15127e-07	3.71413e-06	61
	GO:0015995	chlorophyll biosynthetic process	31/2302	125/20450	1.61689e-05	0.000187439	31			GO:0070589	cellular component macromolecule biosynthetic process	61/3406	195/20450	3.15127e-07	3.71413e-06	61
	GO:0009862	systemic acquired resistance, salicylic acid mediated signaling pathway	51/2302	251/20450	1.98326e-05	0.000226738	51			GO:0070592	cell wall polysaccharide biosynthetic process	61/3406	195/20450	3.15127e-07	3.71413e-06	61
	GO:0046496	nicotinamide nucleotide metabolic process	69/2302	372/20450	1.98486e-05	0.000226738	69			GO:0010941	regulation of cell death	107/3406	404/20450	3.15832e-07	3.71413e-06	107
	GO:0006164	purine nucleotide biosynthetic process	51/2302	252/20450	2.21911e-05	0.00025166	51			GO:0051193	regulation of cofactor metabolic process	64/3406	208/20450	3.17762e-07	3.71413e-06	64
	GO:0006779	porphyrin-containing compound biosynthetic process	35/2302	151/20450	2.2991e-05	0.000258855	35			GO:0042537	benzene-containing compound metabolic process	76/3406	261/20450	3.20147e-07	3.71509e-06	76
	GO:0010224	response to UV-B	27/2302	104/20450	2.31804e-05	0.000259124	27			GO:0035690	cellular response to drug	104/3406	390/20450	3.22782e-07	3.71891e-06	104
	GO:0002252	immune effector process	55/2302	279/20450	2.3664e-05	0.000262654	55			GO:0016109	tetraterpenoid biosynthetic process	38/3406	101/20450	3.3462e-07	3.78665e-06	38
	GO:0019359	nicotinamide nucleotide biosynthetic process	43/2302	202/20450	2.71506e-05	0.00029923	43			GO:0016117	carotenoid biosynthetic process	38/3406	101/20450	3.3462e-07	3.78665e-06	38
	GO:0019362	pyridine nucleotide metabolic process	69/2302	376/20450	2.83856e-05	0.000308705	69			GO:0009813	flavonoid biosynthetic process	66/3406	217/20450	3.35704e-07	3.78665e-06	66
	GO:0008652	cellular amino acid biosynthetic process	80/2302	453/20450	2.84048e-05	0.000308705	80			GO:0009738	abscisic acid-activated signaling pathway	73/3406	248/20450	3.42735e-07	3.81516e-06	73
	GO:0006720	isoprenoid metabolic process	86/2302	496/20450	2.9189e-05	0.000315039	86			GO:0009260	ribonucleotide biosynthetic process	96/3406	353/20450	3.45327e-07	3.81516e-06	96
	GO:0071214	cellular response to abiotic stimulus	37/2302	165/20450	2.96395e-05	0.000315066	37			GO:0046390	ribose phosphate biosynthetic process	96/3406	353/20450	3.45327e-07	3.81516e-06	96
	GO:0104004	cellular response to environmental stimulus	37/2302	165/20450	2.96395e-05	0.000315066	37			GO:0006833	water transport	48/3406	141/20450	3.58086e-07	3.90265e-06	48
	GO:0009658	chloroplast organization	48/2302	235/20450	2.97954e-05	0.000315066	48			GO:0042044	fluid transport	48/3406	141/20450	3.58086e-07	3.90265e-06	48
	GO:0009166	nucleotide catabolic process	42/2302	197/20450	3.22233e-05	0.000336197	42			GO:0009812	flavonoid metabolic process	72/3406	244/20450	3.70436e-07	4.01015e-06	72
	GO:1901292	nucleoside phosphate catabolic process	42/2302	197/20450	3.22233e-05	0.000336197	42			GO:0048878	chemical homeostasis	80/3406	280/20450	3.75753e-07	4.0406e-06	80
	GO:0033014	tetrapyrrole biosynthetic process	35/2302	154/20450	3.57235e-05	0.000370247	35			GO:0043067	regulation of programmed cell death	105/3406	396/20450	3.82556e-07	4.0865e-06	105
	GO:0016109	tetraterpenoid biosynthetic process	26/2302	101/20450	3.81737e-05	0.00039047	26			GO:0033014	tetrapyrrole biosynthetic process	51/3406	154/20450	4.1485e-07	4.40233e-06	51
	GO:0016117	carotenoid biosynthetic process	26/2302	101/20450	3.81737e-05	0.00039047	26			GO:0071236	cellular response to antibiotic	98/3406	364/20450	4.34656e-07	4.58236e-06	98
	GO:0034404	nucleobase-containing small molecule biosynthetic process	43/2302	205/20450	3.931e-05	0.000399482	43			GO:0072593	reactive oxygen species metabolic process	100/3406	374/20450	4.72184e-07	4.94567e-06	100
	GO:0009657	plastid organization	70/2302	387/20450	4.03177e-05	0.000407079	70			GO:0072527	pyrimidine-containing compound metabolic process	51/3406	155/20450	5.19196e-07	5.40299e-06	51
	GO:0009127	purine nucleoside monophosphate biosynthetic process	44/2302	212/20450	4.20413e-05	0.000419074	44			GO:0006779	porphyrin-containing compound biosynthetic process	50/3406	151/20450	5.3869e-07	5.55557e-06	50
	GO:0009168	purine ribonucleoside monophosphate biosynthetic process	44/2302	212/20450	4.20413e-05	0.000419074	44			GO:0048509	regulation of meristem development	67/3406	224/20450	5.40747e-07	5.55557e-06	67
	GO:0019363	pyridine nucleotide biosynthetic process	43/2302	206/20450	4.43573e-05	0.000439361	43			GO:0009451	RNA modification	89/3406	325/20450	6.60114e-07	6.73901e-06	89
	GO:0046434	organophosphate catabolic process	46/2302	226/20450	4.72615e-05	0.000465184	46			GO:0034285	response to disaccharide	64/3406	212/20450	6.72041e-07	6.81763e-06	64
	GO:0009259	ribonucleotide metabolic process	68/2302	376/20450	5.18354e-05	0.000504521	68			GO:0046189	phenol-containing compound biosynthetic process	66/3406	221/20450	6.96291e-07	6.99357e-06	66
	GO:0072524	pyridine-containing compound metabolic process	69/2302	383/20450	5.19028e-05	0.000504521	69			GO:0030003	cellular cation homeostasis	54/3406	169/20450	6.98056e-07	6.99357e-06	54
	GO:0009124	nucleoside monophosphate biosynthetic process	44/2302	214/20450	5.31699e-05	0.000510497	44			GO:0009743	response to carbohydrate	105/3406	401/20450	7.30773e-07	7.2183e-06	105
	GO:0009156	ribonucleoside monophosphate biosynthetic process	44/2302	214/20450	5.31699e-05	0.000510497	44			GO:0071214	cellular response to abiotic stimulus	53/3406	165/20450	7.33913e-07	7.2183e-06	53
	GO:0006595	polyamine metabolic process	17/2302	54/20450	5.54441e-05	0.000529086	17			GO:0104004	cellular response to environmental stimulus	53/3406	165/20450	7.33913e-07	7.2183e-06	53
	GO:0042537	benzene-containing compound metabolic process	51/2302	261/20450	5.8407e-05	0.000553982	51			GO:0006873	cellular ion homeostasis	56/3406	178/20450	7.68842e-07	7.51601e-06	56
	GO:0072525	pyridine-containing compound biosynthetic process	44/2302	215/20450	5.96877e-05	0.000557403	44			GO:0071446	cellular response to salicylic acid stimulus	95/3406	355/20450	8.68422e-07	8.43834e-06	95
	GO:0016054	organic acid catabolic process	69/2302	385/20450	6.1354e-05	0.000557403	69			GO:0016999	antibiotic metabolic process	119/3406	470/20450	8.98089e-07	8.67436e-06	119
	GO:0046395	carboxylic acid catabolic process	69/2302	385/20450	6.1354e-05	0.000557403	69			GO:0009744	response to sucrose	63/3406	210/20450	1.03904e-06	9.97604e-06	63
	GO:0006096	glycolytic process	41/2302	196/20450	6.26856e-05	0.000557403	41			GO:0009733	response to auxin	109/3406	424/20450	1.17924e-06	1.12551e-05	109
	GO:0006165	nucleoside diphosphate phosphorylation	41/2302	196/20450	6.26856e-05	0.000557403	41			GO:0005983	starch catabolic process	12/3406	17/20450	1.20962e-06	1.13437e-05	12
	GO:0006757	ATP generation from ADP	41/2302	196/20450	6.26856e-05	0.000557403	41			GO:0009251	glucan catabolic process	12/3406	17/20450	1.20962e-06	1.13437e-05	12
	GO:0009135	purine nucleoside diphosphate metabolic process	41/2302	196/20450	6.26856e-05	0.000557403	41			GO:0044247	cellular polysaccharide catabolic process	12/3406	17/20450	1.20962e-06	1.13437e-05	12
	GO:0009179	purine ribonucleoside diphosphate metabolic process	41/2302	196/20450	6.26856e-05	0.000557403	41			GO:0000160	phosphorelay signal transduction system	46/3406	138/20450	1.22097e-06	1.13839e-05	46
	GO:0009185	ribonucleoside diphosphate metabolic process	41/2302	196/20450	6.26856e-05	0.000557403	41			GO:0016108	tetraterpenoid metabolic process	38/3406	106/20450	1.36524e-06	1.25836e-05	38
	GO:0042866	pyruvate biosynthetic process	41/2302	196/20450	6.26856e-05	0.000557403	41			GO:0016116	carotenoid metabolic process	38/3406	106/20450	1.36524e-06	1.25836e-05	38
	GO:0046031	ADP metabolic process	41/2302	196/20450	6.26856e-05	0.000557403	41			GO:0055080	cation homeostasis	63/3406	212/20450	1.48496e-06	1.36093e-05	63
	GO:0009595	detection of biotic stimulus	26/2302	104/20450	6.53377e-05	0.000577704	26			GO:0009805	coumarin biosynthetic process	24/3406	54/20450	1.54927e-06	1.41184e-05	24
	GO:0048653	anther development	23/2302	87/20450	6.7107e-05	0.000590014	23			GO:0010218	response to far red light	36/3406	99/20450	1.74123e-06	1.57787e-05	36
	GO:0046939	nucleotide phosphorylation	41/2302	197/20450	7.06917e-05	0.000618058	41			GO:0050801	ion homeostasis	68/3406	236/20450	1.96802e-06	1.77341e-05	68
	GO:0006754	ATP biosynthetic process	42/2302	204/20450	7.52598e-05	0.000639147	42			GO:0061024	membrane organization	63/3406	214/20450	2.10563e-06	1.88688e-05	63
	GO:0009145	purine nucleoside triphosphate biosynthetic process	42/2302	204/20450	7.52598e-05	0.000639147	42			GO:0080167	response to karrikin	43/3406	128/20450	2.12493e-06	1.89366e-05	43
	GO:0009201	ribonucleoside triphosphate biosynthetic process	42/2302	204/20450	7.52598e-05	0.000639147	42			GO:0046686	response to cadmium ion	117/3406	468/20450	2.15999e-06	1.91432e-05	117
	GO:0009206	purine ribonucleoside triphosphate biosynthetic process	42/2302	204/20450	7.52598e-05	0.000639147	42			GO:0048585	negative regulation of response to stimulus	96/3406	367/20450	2.25022e-06	1.98339e-05	96
	GO:0019725	cellular homeostasis	42/2302	204/20450	7.52598e-05	0.000639147	42			GO:0042743	hydrogen peroxide metabolic process	89/3406	334/20450	2.29821e-06	2.00591e-05	89
	GO:0031348	negative regulation of defense response	53/2302	277/20450	7.55541e-05	0.000639147	53			GO:0010114	response to red light	37/3406	104/20450	2.30666e-06	2.00591e-05	37
	GO:0009132	nucleoside diphosphate metabolic process	41/2302	198/20450	7.9616e-05	0.000669888	41			GO:0009804	coumarin metabolic process	24/3406	55/20450	2.31609e-06	2.00591e-05	24
	GO:0009142	nucleoside triphosphate biosynthetic process	42/2302	205/20450	8.4523e-05	0.000706838	42			GO:0009863	salicylic acid mediated signaling pathway	93/3406	353/20450	2.32551e-06	2.00591e-05	93
	GO:0006633	fatty acid biosynthetic process	34/2302	154/20450	8.49109e-05	0.000706838	34			GO:0009668	plastid membrane organization	59/3406	197/20450	2.39176e-06	2.04122e-05	59
	GO:0016108	tetraterpenoid metabolic process	26/2302	106/20450	9.20242e-05	0.000757989	26			GO:0010027	thylakoid membrane organization	59/3406	197/20450	2.39176e-06	2.04122e-05	59
	GO:0016116	carotenoid metabolic process	26/2302	106/20450	9.20242e-05	0.000757989	26			GO:0006066	alcohol metabolic process	55/3406	180/20450	2.63914e-06	2.24049e-05	55
	GO:0009773	photosynthetic electron transport in photosystem I	15/2302	46/20450	9.58417e-05	0.0007853	15			GO:0018958	phenol-containing compound metabolic process	68/3406	238/20450	2.72169e-06	2.29848e-05	68
	GO:0019682	glyceraldehyde-3-phosphate metabolic process	61/2302	335/20450	0.000100828	0.000821855	61			GO:0009873	ethylene-activated signaling pathway	42/3406	125/20450	2.76154e-06	2.31998e-05	42
	GO:0042737	drug catabolic process	31/2302	137/20450	0.000105952	0.000859145	31			GO:0015849	organic acid transport	77/3406	280/20450	3.06355e-06	2.54717e-05	77
	GO:0008299	isoprenoid biosynthetic process	80/2302	471/20450	0.000110822	0.000894004	80			GO:0046942	carboxylic acid transport	77/3406	280/20450	3.06355e-06	2.54717e-05	77
	GO:0009069	serine family amino acid metabolic process	49/2302	254/20450	0.000112225	0.000900679	49			GO:0009808	lignin metabolic process	26/3406	63/20450	3.18634e-06	2.63568e-05	26
	GO:0019439	aromatic compound catabolic process	82/2302	486/20450	0.000115072	0.000918817	82			GO:0006644	phospholipid metabolic process	104/3406	409/20450	3.48881e-06	2.87115e-05	104
	GO:0046189	phenol-containing compound biosynthetic process	44/2302	221/20450	0.000116593	0.00092623	44			GO:0010207	photosystem II assembly	49/3406	156/20450	3.85459e-06	3.15606e-05	49
	GO:0009750	response to fructose	32/2302	144/20450	0.000118827	0.00093921	32			GO:0009773	photosynthetic electron transport in photosystem I	21/3406	46/20450	4.09342e-06	3.32302e-05	21
	GO:1901361	organic cyclic compound catabolic process	83/2302	494/20450	0.000121209	0.000953225	83			GO:0009697	salicylic acid biosynthetic process	61/3406	209/20450	4.1203e-06	3.32302e-05	61
	GO:0006568	tryptophan metabolic process	24/2302	96/20450	0.00012277	0.000955899	24			GO:0070838	divalent metal ion transport	61/3406	209/20450	4.1203e-06	3.32302e-05	61
	GO:0006586	indolalkylamine metabolic process	24/2302	96/20450	0.00012277	0.000955899	24			GO:0009991	response to extracellular stimulus	96/3406	372/20450	4.19604e-06	3.36727e-05	96
	GO:0046283	anthocyanin-containing compound metabolic process	22/2302	85/20450	0.000134472	0.00104182	22			GO:0034284	response to monosaccharide	53/3406	174/20450	4.40536e-06	3.51775e-05	53
	GO:0042435	indole-containing compound biosynthetic process	30/2302	133/20450	0.000144192	0.00110815	30			GO:0009767	photosynthetic electron transport chain	26/3406	64/20450	4.52037e-06	3.56717e-05	26
	GO:0009152	purine ribonucleotide biosynthetic process	44/2302	223/20450	0.000144449	0.00110815	44			GO:0046471	phosphatidylglycerol metabolic process	26/3406	64/20450	4.52037e-06	3.56717e-05	26
	GO:1901606	alpha-amino acid catabolic process	34/2302	159/20450	0.00016391	0.00124574	34			GO:0043900	regulation of multi-organism process	46/3406	144/20450	4.54601e-06	3.56717e-05	46
	GO:0000272	polysaccharide catabolic process	15/2302	48/20450	0.000164666	0.00124574	15			GO:0009692	ethylene metabolic process	40/3406	119/20450	4.66629e-06	3.56717e-05	40
	GO:0072521	purine-containing compound metabolic process	55/2302	299/20450	0.000164773	0.00124574	55			GO:0009693	ethylene biosynthetic process	40/3406	119/20450	4.66629e-06	3.56717e-05	40
	GO:0001510	RNA methylation	36/2302	172/20450	0.000168334	0.00126655	36			GO:0043449	cellular alkene metabolic process	40/3406	119/20450	4.66629e-06	3.56717e-05	40
	GO:0010114	response to red light	25/2302	104/20450	0.000175445	0.00130748	25			GO:0043450	alkene biosynthetic process	40/3406	119/20450	4.66629e-06	3.56717e-05	40
	GO:0070482	response to oxygen levels	25/2302	104/20450	0.000175445	0.00130748	25			GO:1900673	olefin metabolic process	40/3406	119/20450	4.66629e-06	3.56717e-05	40
	GO:0009063	cellular amino acid catabolic process	34/2302	160/20450	0.000185999	0.00137957	34			GO:1900674	olefin biosynthetic process	40/3406	119/20450	4.66629e-06	3.56717e-05	40
	GO:0055082	cellular chemical homeostasis	38/2302	187/20450	0.000213642	0.0015762	38			GO:0071496	cellular response to external stimulus	91/3406	349/20450	4.70249e-06	3.57067e-05	91
	GO:0015979	photosynthesis	61/2302	344/20450	0.000214525	0.0015762	61			GO:0009746	response to hexose	52/3406	170/20450	4.71514e-06	3.57067e-05	52
	GO:0046700	heterocycle catabolic process	81/2302	488/20450	0.000217643	0.00159164	81			GO:0009862	systemic acquired resistance, salicylic acid mediated signaling pathway	70/3406	251/20450	4.97731e-06	3.75159e-05	70
	GO:0009123	nucleoside monophosphate metabolic process	45/2302	234/20450	0.000224972	0.00163001	45			GO:0019220	regulation of phosphate metabolic process	58/3406	197/20450	5.22665e-06	3.90305e-05	58
	GO:0009161	ribonucleoside monophosphate metabolic process	45/2302	234/20450	0.000224972	0.00163001	45			GO:0051174	regulation of phosphorus metabolic process	58/3406	197/20450	5.22665e-06	3.90305e-05	58
	GO:0006163	purine nucleotide metabolic process	51/2302	275/20450	0.000227605	0.00164148	51			GO:0072511	divalent inorganic cation transport	61/3406	211/20450	5.75785e-06	4.27991e-05	61
	GO:0051049	regulation of transport	36/2302	175/20450	0.000240697	0.00172398	36			GO:0010264	myo-inositol hexakisphosphate biosynthetic process	26/3406	65/20450	6.34658e-06	4.67445e-05	26
	GO:0009850	auxin metabolic process	31/2302	143/20450	0.000241248	0.00172398	31			GO:0033517	myo-inositol hexakisphosphate metabolic process	26/3406	65/20450	6.34658e-06	4.67445e-05	26
	GO:0030003	cellular cation homeostasis	35/2302	169/20450	0.000254784	0.00181244	35			GO:0006457	protein folding	78/3406	290/20450	6.51832e-06	4.77912e-05	78
	GO:0009074	aromatic amino acid family catabolic process	21/2302	83/20450	0.00026612	0.00188452	21			GO:0009259	ribonucleotide metabolic process	96/3406	376/20450	6.79349e-06	4.95832e-05	96
	GO:0070838	divalent metal ion transport	41/2302	209/20450	0.000271185	0.00191173	41			GO:0006636	unsaturated fatty acid biosynthetic process	27/3406	69/20450	6.91914e-06	5.00474e-05	27
	GO:0050801	ion homeostasis	45/2302	236/20450	0.000274176	0.00192014	45			GO:0033559	unsaturated fatty acid metabolic process	27/3406	69/20450	6.91914e-06	5.00474e-05	27
	GO:0043900	regulation of multi-organism process	31/2302	144/20450	0.000274832	0.00192014	31			GO:0008654	phospholipid biosynthetic process	98/3406	386/20450	7.06527e-06	5.08762e-05	98
	GO:0043648	dicarboxylic acid metabolic process	12/2302	35/20450	0.000279136	0.00194154	12			GO:0031348	negative regulation of defense response	75/3406	277/20450	7.52254e-06	5.37433e-05	75
	GO:0044270	cellular nitrogen compound catabolic process	80/2302	486/20450	0.000309802	0.00214531	80			GO:0031668	cellular response to extracellular stimulus	90/3406	348/20450	7.53006e-06	5.37433e-05	90
	GO:0042398	cellular modified amino acid biosynthetic process	16/2302	56/20450	0.000321058	0.00219208	16			GO:0048443	stamen development	53/3406	177/20450	7.64721e-06	5.38644e-05	53
	GO:0016144	S-glycoside biosynthetic process	35/2302	171/20450	0.000322158	0.00219208	35			GO:0048466	androecium development	53/3406	177/20450	7.64721e-06	5.38644e-05	53
	GO:0019758	glycosinolate biosynthetic process	35/2302	171/20450	0.000322158	0.00219208	35			GO:0051640	organelle localization	53/3406	177/20450	7.64721e-06	5.38644e-05	53
	GO:0019761	glucosinolate biosynthetic process	35/2302	171/20450	0.000322158	0.00219208	35			GO:0009696	salicylic acid metabolic process	63/3406	222/20450	7.89637e-06	5.53776e-05	63
	GO:0009126	purine nucleoside monophosphate metabolic process	44/2302	231/20450	0.000326223	0.0022006	44			GO:0006626	protein targeting to mitochondrion	36/3406	105/20450	8.27045e-06	5.72542e-05	36
	GO:0009167	purine ribonucleoside monophosphate metabolic process	44/2302	231/20450	0.000326223	0.0022006	44			GO:0070585	protein localization to mitochondrion	36/3406	105/20450	8.27045e-06	5.72542e-05	36
	GO:0018958	phenol-containing compound metabolic process	45/2302	238/20450	0.000332839	0.00223189	45			GO:0072655	establishment of protein localization to mitochondrion	36/3406	105/20450	8.27045e-06	5.72542e-05	36
	GO:0072511	divalent inorganic cation transport	41/2302	211/20450	0.000333714	0.00223189	41			GO:0032958	inositol phosphate biosynthetic process	26/3406	66/20450	8.82212e-06	6.08123e-05	26
	GO:0000023	maltose metabolic process	32/2302	152/20450	0.000337594	0.00224823	32			GO:0000272	polysaccharide catabolic process	21/3406	48/20450	9.36093e-06	6.42519e-05	21
	GO:0048366	leaf development	72/2302	429/20450	0.000341528	0.00226479	72			GO:0035304	regulation of protein dephosphorylation	44/3406	139/20450	9.41978e-06	6.43818e-05	44
	GO:0006631	fatty acid metabolic process	71/2302	422/20450	0.000347803	0.00229668	71			GO:0046173	polyol biosynthetic process	27/3406	70/20450	9.48738e-06	6.45702e-05	27
	GO:0006569	tryptophan catabolic process	20/2302	79/20450	0.000365801	0.00237543	20			GO:0002252	immune effector process	75/3406	279/20450	9.92319e-06	6.72525e-05	75
	GO:0046218	indolalkylamine catabolic process	20/2302	79/20450	0.000365801	0.00237543	20			GO:0009411	response to UV	68/3406	247/20450	1.0807e-05	7.29362e-05	68
	GO:0071478	cellular response to radiation	20/2302	79/20450	0.000365801	0.00237543	20			GO:0009750	response to fructose	45/3406	144/20450	1.08816e-05	7.31336e-05	45
	GO:0071482	cellular response to light stimulus	20/2302	79/20450	0.000365801	0.00237543	20			GO:0048366	leaf development	106/3406	429/20450	1.10284e-05	7.38123e-05	106
	GO:0055080	cation homeostasis	41/2302	212/20450	0.000369572	0.00239	41			GO:0006655	phosphatidylglycerol biosynthetic process	25/3406	63/20450	1.12304e-05	7.45456e-05	25
	GO:0036293	response to decreased oxygen levels	24/2302	103/20450	0.000385387	0.00248202	24			GO:0009612	response to mechanical stimulus	25/3406	63/20450	1.12304e-05	7.45456e-05	25
	GO:0009240	isopentenyl diphosphate biosynthetic process	44/2302	233/20450	0.00039587	0.00252872	44			GO:0042592	homeostatic process	92/3406	361/20450	1.13171e-05	7.48136e-05	92
	GO:0046490	isopentenyl diphosphate metabolic process	44/2302	233/20450	0.00039587	0.00252872	44			GO:0035303	regulation of dephosphorylation	44/3406	140/20450	1.15459e-05	7.60145e-05	44
	GO:0042430	indole-containing compound metabolic process	31/2302	147/20450	0.00040187	0.00255661	31			GO:0016556	mRNA modification	38/3406	115/20450	1.25011e-05	8.19688e-05	38
	GO:0009411	response to UV	46/2302	247/20450	0.000408146	0.00257992	46			GO:0042398	cellular modified amino acid biosynthetic process	23/3406	56/20450	1.27974e-05	8.35718e-05	23
	GO:0032879	regulation of localization	41/2302	213/20450	0.000408831	0.00257992	41			GO:0042793	plastid transcription	27/3406	71/20450	1.28958e-05	8.38746e-05	27
	GO:1901659	glycosyl compound biosynthetic process	36/2302	180/20450	0.000424472	0.00266786	36			GO:0000165	MAPK cascade	62/3406	221/20450	1.37532e-05	8.87358e-05	62
	GO:0044272	sulfur compound biosynthetic process	78/2302	477/20450	0.000448754	0.0028092	78			GO:0023014	signal transduction by protein phosphorylation	62/3406	221/20450	1.37532e-05	8.87358e-05	62
	GO:0006721	terpenoid metabolic process	52/2302	290/20450	0.000460545	0.0028577	52			GO:0071478	cellular response to radiation	29/3406	79/20450	1.38983e-05	8.89599e-05	29
	GO:0000165	MAPK cascade	42/2302	221/20450	0.000461979	0.0028577	42			GO:0071482	cellular response to light stimulus	29/3406	79/20450	1.38983e-05	8.89599e-05	29
	GO:0023014	signal transduction by protein phosphorylation	42/2302	221/20450	0.000461979	0.0028577	42			GO:0044275	cellular carbohydrate catabolic process	14/3406	26/20450	1.59981e-05	0.000101996	14
	GO:0009646	response to absence of light	12/2302	37/20450	0.000500198	0.00308193	12			GO:0015711	organic anion transport	79/3406	302/20450	1.70646e-05	0.000108367	79
	GO:0019288	isopentenyl diphosphate biosynthetic process, methylerythritol 4-phosphate pathway	43/2302	229/20450	0.000517839	0.00317645	43			GO:0007005	mitochondrion organization	40/3406	125/20450	1.76777e-05	0.00011182	40
	GO:0042436	indole-containing compound catabolic process	20/2302	81/20450	0.000519598	0.00317645	20			GO:0042538	hyperosmotic salinity response	48/3406	161/20450	2.27609e-05	0.000143411	48
	GO:0009070	serine family amino acid biosynthetic process	40/2302	209/20450	0.000537969	0.00327596	40			GO:0046165	alcohol biosynthetic process	39/3406	122/20450	2.2972e-05	0.000144179	39
	GO:0009144	purine nucleoside triphosphate metabolic process	42/2302	223/20450	0.000560158	0.0033588	42			GO:0043647	inositol phosphate metabolic process	31/3406	89/20450	2.40003e-05	0.000150048	31
	GO:0009199	ribonucleoside triphosphate metabolic process	42/2302	223/20450	0.000560158	0.0033588	42			GO:0031399	regulation of protein modification process	57/3406	202/20450	2.49473e-05	0.000155367	57
	GO:0009205	purine ribonucleoside triphosphate metabolic process	42/2302	223/20450	0.000560158	0.0033588	42			GO:0031667	response to nutrient levels	85/3406	334/20450	2.53009e-05	0.000156561	85
	GO:0046034	ATP metabolic process	42/2302	223/20450	0.000560158	0.0033588	42			GO:0019751	polyol metabolic process	37/3406	114/20450	2.53332e-05	0.000156561	37
	GO:0051606	detection of stimulus	30/2302	144/20450	0.00061158	0.00363711	30			GO:1903338	regulation of cell wall organization or biogenesis	11/3406	18/20450	2.71559e-05	0.000167185	11
	GO:0042214	terpene metabolic process	8/2302	19/20450	0.000612011	0.00363711	8			GO:0006865	amino acid transport	68/3406	255/20450	3.32035e-05	0.00020364	68
	GO:0001666	response to hypoxia	23/2302	100/20450	0.000613545	0.00363711	23			GO:0009108	coenzyme biosynthetic process	86/3406	342/20450	3.64374e-05	0.000222627	86
	GO:0009141	nucleoside triphosphate metabolic process	42/2302	224/20450	0.000615874	0.00363714	42			GO:0006721	terpenoid metabolic process	75/3406	290/20450	4.15884e-05	0.000251785	75
	GO:0009073	aromatic amino acid family biosynthetic process	22/2302	94/20450	0.000620493	0.00364334	22			GO:0045893	positive regulation of transcription, DNA-templated	108/3406	452/20450	4.19902e-05	0.000251785	108
	GO:0022900	electron transport chain	21/2302	88/20450	0.00062158	0.00364334	21			GO:0051254	positive regulation of RNA metabolic process	108/3406	452/20450	4.19902e-05	0.000251785	108
	GO:0007030	Golgi organization	35/2302	177/20450	0.000629091	0.00367361	35			GO:1902680	positive regulation of RNA biosynthetic process	108/3406	452/20450	4.19902e-05	0.000251785	108
	GO:0006081	cellular aldehyde metabolic process	71/2302	431/20450	0.000640842	0.00372832	71			GO:1903508	positive regulation of nucleic acid-templated transcription	108/3406	452/20450	4.19902e-05	0.000251785	108
	GO:0044093	positive regulation of molecular function	26/2302	119/20450	0.000650279	0.00376921	26			GO:0006598	polyamine catabolic process	17/3406	38/20450	4.64924e-05	0.000277749	17
	GO:0006873	cellular ion homeostasis	35/2302	178/20450	0.000699916	0.00404195	35			GO:2000652	regulation of secondary cell wall biogenesis	10/3406	16/20450	4.88984e-05	0.000291045	10
	GO:0019344	cysteine biosynthetic process	39/2302	205/20450	0.000707004	0.00406787	39			GO:0031669	cellular response to nutrient levels	79/3406	311/20450	5.13025e-05	0.000304232	79
	GO:0009718	anthocyanin-containing compound biosynthetic process	16/2302	60/20450	0.000746033	0.00427671	16			GO:0051049	regulation of transport	50/3406	175/20450	5.36448e-05	0.000316956	50
	GO:0060548	negative regulation of cell death	34/2302	172/20450	0.000750427	0.0042862	34			GO:0071369	cellular response to ethylene stimulus	43/3406	144/20450	5.67915e-05	0.000334324	43
	GO:0042592	homeostatic process	61/2302	361/20450	0.000781443	0.00444712	61			GO:0017000	antibiotic biosynthetic process	74/3406	288/20450	5.8591e-05	0.000343486	74
	GO:0010286	heat acclimation	20/2302	84/20450	0.00085429	0.00484407	20			GO:0009072	aromatic amino acid family metabolic process	62/3406	231/20450	5.87739e-05	0.000343486	62
	GO:0006534	cysteine metabolic process	39/2302	207/20450	0.000857988	0.00484748	39			GO:0032879	regulation of localization	58/3406	213/20450	6.47647e-05	0.000377132	58
	GO:0010583	response to cyclopentenone	30/2302	147/20450	0.000872193	0.00491001	30			GO:0019216	regulation of lipid metabolic process	19/3406	46/20450	6.5221e-05	0.000378422	19
	GO:0016556	mRNA modification	25/2302	115/20450	0.000883322	0.00495484	25			GO:0031328	positive regulation of cellular biosynthetic process	113/3406	485/20450	8.67963e-05	0.000501801	113
	GO:0009684	indoleacetic acid biosynthetic process	24/2302	109/20450	0.000917409	0.00511127	24			GO:0048638	regulation of developmental growth	71/3406	277/20450	8.87532e-05	0.000511137	71
	GO:0007568	aging	31/2302	154/20450	0.000917742	0.00511127	31			GO:0010109	regulation of photosynthesis	13/3406	26/20450	8.90449e-05	0.000511137	13
	GO:0045893	positive regulation of transcription, DNA-templated	73/2302	452/20450	0.000955186	0.00524514	73			GO:0016311	dephosphorylation	56/3406	206/20450	9.00363e-05	0.000514995	56
	GO:0051254	positive regulation of RNA metabolic process	73/2302	452/20450	0.000955186	0.00524514	73			GO:0009741	response to brassinosteroid	36/3406	116/20450	9.27767e-05	0.000528794	36
	GO:1902680	positive regulation of RNA biosynthetic process	73/2302	452/20450	0.000955186	0.00524514	73			GO:0006995	cellular response to nitrogen starvation	12/3406	23/20450	9.82809e-05	0.000558194	12
	GO:1903508	positive regulation of nucleic acid-templated transcription	73/2302	452/20450	0.000955186	0.00524514	73			GO:0009267	cellular response to starvation	74/3406	293/20450	0.000105957	0.000599681	74
	GO:0009962	regulation of flavonoid biosynthetic process	26/2302	122/20450	0.000962751	0.0052682	26			GO:0090626	plant epidermis morphogenesis	75/3406	298/20450	0.000107708	0.00060746	75
	GO:0043069	negative regulation of programmed cell death	33/2302	168/20450	0.000996258	0.00541508	33			GO:0007167	enzyme linked receptor protein signaling pathway	39/3406	130/20450	0.000110035	0.000616275	39
	GO:0010628	positive regulation of gene expression	76/2302	475/20450	0.000996513	0.00541508	76			GO:0007169	transmembrane receptor protein tyrosine kinase signaling pathway	39/3406	130/20450	0.000110035	0.000616275	39
	GO:0072528	pyrimidine-containing compound biosynthetic process	29/2302	142/20450	0.00104109	0.00563773	29			GO:0010224	response to UV-B	33/3406	104/20450	0.000111077	0.000619953	33
	GO:0009683	indoleacetic acid metabolic process	24/2302	110/20450	0.00105044	0.00566876	24			GO:0009965	leaf morphogenesis	57/3406	213/20450	0.000124385	0.000691839	57
	GO:0043085	positive regulation of catalytic activity	25/2302	117/20450	0.00114714	0.00616935	25			GO:0071669	plant-type cell wall organization or biogenesis	111/3406	479/20450	0.000125393	0.00069505	111
	GO:0010557	positive regulation of macromolecule biosynthetic process	76/2302	478/20450	0.00119165	0.00638677	76			GO:0009962	regulation of flavonoid biosynthetic process	37/3406	122/20450	0.000127308	0.000703244	37
	GO:0015711	organic anion transport	52/2302	302/20450	0.00119669	0.00639186	52			GO:0009809	lignin biosynthetic process	20/3406	52/20450	0.000138725	0.000763699	20
	GO:0009250	glucan biosynthetic process	50/2302	288/20450	0.0012241	0.00647519	50			GO:0009624	response to nematode	27/3406	80/20450	0.000144592	0.000793291	27
	GO:0043269	regulation of ion transport	30/2302	150/20450	0.00122502	0.00647519	30			GO:0006633	fatty acid biosynthetic process	44/3406	154/20450	0.000145845	0.000797452	44
	GO:0016143	S-glycoside metabolic process	38/2302	204/20450	0.00123347	0.00647519	38			GO:0001505	regulation of neurotransmitter levels	24/3406	68/20450	0.000152223	0.000816638	24
	GO:0019757	glycosinolate metabolic process	38/2302	204/20450	0.00123347	0.00647519	38			GO:0042133	neurotransmitter metabolic process	24/3406	68/20450	0.000152223	0.000816638	24
	GO:0019760	glucosinolate metabolic process	38/2302	204/20450	0.00123347	0.00647519	38			GO:0010118	stomatal movement	31/3406	97/20450	0.000152737	0.000816638	31
	GO:0009851	auxin biosynthetic process	26/2302	124/20450	0.00123711	0.00647519	26			GO:0045935	positive regulation of nucleobase-containing compound metabolic process	108/3406	466/20450	0.000152883	0.000816638	108
	GO:0048443	stamen development	34/2302	177/20450	0.00126218	0.0065625	34			GO:0009403	toxin biosynthetic process	8/3406	12/20450	0.000153911	0.000816638	8
	GO:0048466	androecium development	34/2302	177/20450	0.00126218	0.0065625	34			GO:0009700	indole phytoalexin biosynthetic process	8/3406	12/20450	0.000153911	0.000816638	8
	GO:0009150	purine ribonucleotide metabolic process	44/2302	246/20450	0.00127043	0.0065835	44			GO:0046217	indole phytoalexin metabolic process	8/3406	12/20450	0.000153911	0.000816638	8
	GO:0042752	regulation of circadian rhythm	13/2302	46/20450	0.00127687	0.00659504	13			GO:0052314	phytoalexin metabolic process	8/3406	12/20450	0.000153911	0.000816638	8
	GO:0006766	vitamin metabolic process	22/2302	99/20450	0.00129363	0.00665963	22			GO:0052315	phytoalexin biosynthetic process	8/3406	12/20450	0.000153911	0.000816638	8
	GO:0030968	endoplasmic reticulum unfolded protein response	35/2302	185/20450	0.00142401	0.0073068	35			GO:0043269	regulation of ion transport	43/3406	150/20450	0.000158915	0.000840424	43
	GO:0055114	oxidation-reduction process	61/2302	370/20450	0.00145117	0.00742183	61			GO:0046283	anthocyanin-containing compound metabolic process	28/3406	85/20450	0.000176048	0.000927992	28
	GO:0009965	leaf morphogenesis	39/2302	213/20450	0.00149437	0.00761786	39			GO:0010557	positive regulation of macromolecule biosynthetic process	110/3406	478/20450	0.000178815	0.000939509	110
	GO:0034754	cellular hormone metabolic process	33/2302	172/20450	0.00150562	0.00765033	33			GO:0042254	ribosome biogenesis	82/3406	338/20450	0.000197664	0.00103517	82
	GO:0015718	monocarboxylic acid transport	7/2302	17/20450	0.00158479	0.00802651	7			GO:0010628	positive regulation of gene expression	109/3406	475/20450	0.000214032	0.00111726	109
	GO:0015698	inorganic anion transport	45/2302	256/20450	0.00161781	0.00816733	45			GO:1901657	glycosyl compound metabolic process	62/3406	241/20450	0.000214949	0.00111843	62
	GO:0051656	establishment of organelle localization	23/2302	107/20450	0.00162955	0.00820015	23			GO:0007166	cell surface receptor signaling pathway	39/3406	134/20450	0.000222465	0.00115381	39
	GO:0019684	photosynthesis, light reaction	47/2302	271/20450	0.00171992	0.00855784	47			GO:0009739	response to gibberellin	46/3406	166/20450	0.000227686	0.00117711	46
	GO:0006986	response to unfolded protein	35/2302	187/20450	0.00172488	0.00855784	35			GO:0006470	protein dephosphorylation	49/3406	180/20450	0.000231005	0.00119045	49
	GO:0034620	cellular response to unfolded protein	35/2302	187/20450	0.00172488	0.00855784	35			GO:0016143	S-glycoside metabolic process	54/3406	204/20450	0.000248591	0.00126891	54
	GO:0035967	cellular response to topologically incorrect protein	35/2302	187/20450	0.00172488	0.00855784	35			GO:0019757	glycosinolate metabolic process	54/3406	204/20450	0.000248591	0.00126891	54
	GO:0010119	regulation of stomatal movement	14/2302	53/20450	0.00172797	0.00855784	14			GO:0019760	glucosinolate metabolic process	54/3406	204/20450	0.000248591	0.00126891	54
	GO:0031328	positive regulation of cellular biosynthetic process	76/2302	485/20450	0.00178466	0.00879182	76			GO:0042594	response to starvation	74/3406	301/20450	0.000257943	0.0013125	74
	GO:0009404	toxin metabolic process	40/2302	222/20450	0.00178645	0.00879182	40			GO:0048481	plant ovule development	44/3406	158/20450	0.000273321	0.00138637	44
	GO:0006220	pyrimidine nucleotide metabolic process	27/2302	134/20450	0.00186859	0.00913856	27			GO:0008643	carbohydrate transport	14/3406	32/20450	0.000288556	0.00145906	14
	GO:0006221	pyrimidine nucleotide biosynthetic process	27/2302	134/20450	0.00186859	0.00913856	27			GO:0008202	steroid metabolic process	62/3406	244/20450	0.000308402	0.00155454	62
	GO:0016114	terpenoid biosynthetic process	46/2302	265/20450	0.00187777	0.00915484	46			GO:0035670	plant-type ovary development	44/3406	159/20450	0.000317868	0.00159726	44
	GO:0006949	syncytium formation	8/2302	22/20450	0.00190036	0.00923624	8			GO:0006546	glycine catabolic process	19/3406	51/20450	0.000327835	0.00164223	19
	GO:0009697	salicylic acid biosynthetic process	38/2302	209/20450	0.00193989	0.00939914	38			GO:0051173	positive regulation of nitrogen compound metabolic process	112/3406	496/20450	0.000339389	0.00169485	112
	GO:0009637	response to blue light	26/2302	128/20450	0.001993	0.0096267	26			GO:0006839	mitochondrial transport	41/3406	146/20450	0.000358563	0.0017836	41
	GO:0051173	positive regulation of nitrogen compound metabolic process	77/2302	496/20450	0.0021608	0.0104051	77			GO:0022613	ribonucleoprotein complex biogenesis	82/3406	344/20450	0.000359374	0.0017836	82
	GO:0045935	positive regulation of nucleobase-containing compound metabolic process	73/2302	466/20450	0.00218773	0.0105025	73			GO:0042548	regulation of photosynthesis, light reaction	9/3406	16/20450	0.000362195	0.00179209	9
	GO:0009902	chloroplast relocation	22/2302	103/20450	0.00221301	0.0105269	22			GO:0042737	drug catabolic process	39/3406	137/20450	0.000365486	0.00180284	39
	GO:0009963	positive regulation of flavonoid biosynthetic process	22/2302	103/20450	0.00221301	0.0105269	22			GO:0016114	terpenoid biosynthetic process	66/3406	265/20450	0.000368242	0.0018109	66
	GO:0051667	establishment of plastid localization	22/2302	103/20450	0.00221301	0.0105269	22			GO:0015931	nucleobase-containing compound transport	36/3406	124/20450	0.000400647	0.00196427	36
	GO:0009741	response to brassinosteroid	24/2302	116/20450	0.00225174	0.0106787	24			GO:0072522	purine-containing compound biosynthetic process	65/3406	261/20450	0.00040666	0.0019877	65
	GO:0051187	cofactor catabolic process	27/2302	136/20450	0.00233439	0.0110372	27			GO:0040008	regulation of growth	74/3406	306/20450	0.000434491	0.0021136	74
	GO:0031668	cellular response to extracellular stimulus	57/2302	348/20450	0.00236074	0.0111282	57			GO:0006631	fatty acid metabolic process	97/3406	422/20450	0.000435037	0.0021136	97
	GO:0071370	cellular response to gibberellin stimulus	19/2302	85/20450	0.00249638	0.0117322	19			GO:0016052	carbohydrate catabolic process	80/3406	336/20450	0.000436952	0.00211653	80
	GO:0019750	chloroplast localization	22/2302	104/20450	0.00251444	0.0117352	22			GO:0009718	anthocyanin-containing compound biosynthetic process	21/3406	60/20450	0.000438843	0.00211932	21
	GO:0051644	plastid localization	22/2302	104/20450	0.00251444	0.0117352	22			GO:0006164	purine nucleotide biosynthetic process	63/3406	252/20450	0.000443366	0.00213478	63
	GO:0071496	cellular response to external stimulus	57/2302	349/20450	0.00251951	0.0117352	57			GO:0007017	microtubule-based process	65/3406	262/20450	0.00045435	0.00218115	65
	GO:0017001	antibiotic catabolic process	17/2302	73/20450	0.00260821	0.0121123	17			GO:0009073	aromatic amino acid family biosynthetic process	29/3406	94/20450	0.000476692	0.00228162	29
	GO:0065009	regulation of molecular function	43/2302	248/20450	0.00264236	0.0122346	43			GO:0007389	pattern specification process	82/3406	347/20450	0.00047876	0.00228473	82
	GO:1901657	glycosyl compound metabolic process	42/2302	241/20450	0.00266905	0.0123217	42			GO:0009646	response to absence of light	15/3406	37/20450	0.000481265	0.00228991	15
	GO:0002831	regulation of response to biotic stimulus	9/2302	28/20450	0.00267802	0.0123268	9			GO:0009963	positive regulation of flavonoid biosynthetic process	31/3406	103/20450	0.000499996	0.00237204	31
	GO:0010016	shoot system morphogenesis	73/2302	471/20450	0.00288691	0.0132493	73			GO:0046890	regulation of lipid biosynthetic process	11/3406	23/20450	0.000510642	0.00241544	11
	GO:0009267	cellular response to starvation	49/2302	293/20450	0.00300232	0.0137387	49			GO:0016226	iron-sulfur cluster assembly	30/3406	99/20450	0.000538337	0.00253159	30
	GO:0001505	regulation of neurotransmitter levels	16/2302	68/20450	0.003078	0.0140031	16			GO:0031163	metallo-sulfur cluster assembly	30/3406	99/20450	0.000538337	0.00253159	30
	GO:0042133	neurotransmitter metabolic process	16/2302	68/20450	0.003078	0.0140031	16			GO:0009310	amine catabolic process	34/3406	117/20450	0.00056118	0.00262372	34
	GO:1901607	alpha-amino acid biosynthetic process	61/2302	382/20450	0.00310427	0.0140817	61			GO:0042402	cellular biogenic amine catabolic process	34/3406	117/20450	0.00056118	0.00262372	34
	GO:0009696	salicylic acid metabolic process	39/2302	222/20450	0.00320853	0.0145126	39			GO:0006544	glycine metabolic process	20/3406	57/20450	0.000573878	0.00266789	20
	GO:0015849	organic acid transport	47/2302	280/20450	0.00334604	0.0150361	47			GO:0009071	serine family amino acid catabolic process	19/3406	53/20450	0.000575589	0.00266789	19
	GO:0046942	carboxylic acid transport	47/2302	280/20450	0.00334604	0.0150361	47			GO:0042135	neurotransmitter catabolic process	19/3406	53/20450	0.000575589	0.00266789	19
	GO:0048826	cotyledon morphogenesis	7/2302	19/20450	0.0033531	0.0150361	7			GO:0010120	camalexin biosynthetic process	7/3406	11/20450	0.000624056	0.00287601	7
	GO:0009218	pyrimidine ribonucleotide metabolic process	26/2302	133/20450	0.00346449	0.0154471	26			GO:0052317	camalexin metabolic process	7/3406	11/20450	0.000624056	0.00287601	7
	GO:0009220	pyrimidine ribonucleotide biosynthetic process	26/2302	133/20450	0.00346449	0.0154471	26			GO:0015718	monocarboxylic acid transport	9/3406	17/20450	0.000656059	0.00301488	9
	GO:0048574	long-day photoperiodism, flowering	8/2302	24/20450	0.00355965	0.0158263	8			GO:0022900	electron transport chain	27/3406	88/20450	0.000807123	0.00369855	27
	GO:0009808	lignin metabolic process	15/2302	63/20450	0.00362651	0.0160779	15			GO:0000226	microtubule cytoskeleton organization	60/3406	243/20450	0.000833748	0.00380973	60
	GO:0098771	inorganic ion homeostasis	27/2302	141/20450	0.00395054	0.0174649	27			GO:0010089	xylem development	26/3406	84/20450	0.00086424	0.00393791	26
	GO:0071489	cellular response to red or far red light	12/2302	46/20450	0.00402925	0.0177627	12			GO:0016144	S-glycoside biosynthetic process	45/3406	171/20450	0.000888855	0.00401603	45
	GO:0098754	detoxification	39/2302	225/20450	0.00406933	0.0178891	39			GO:0019758	glycosinolate biosynthetic process	45/3406	171/20450	0.000888855	0.00401603	45
	GO:0072527	pyrimidine-containing compound metabolic process	29/2302	155/20450	0.00409839	0.0179663	29			GO:0019761	glucosinolate biosynthetic process	45/3406	171/20450	0.000888855	0.00401603	45
	GO:0009991	response to extracellular stimulus	59/2302	372/20450	0.0041736	0.0182449	59			GO:0052542	defense response by callose deposition	21/3406	63/20450	0.00091576	0.00412604	21
	GO:0010256	endomembrane system organization	35/2302	197/20450	0.00419656	0.0182942	35			GO:0006855	drug transmembrane transport	10/3406	21/20450	0.000960507	0.00431559	10
	GO:0046471	phosphatidylglycerol metabolic process	15/2302	64/20450	0.00425368	0.0184917	15			GO:0007030	Golgi organization	46/3406	177/20450	0.0010432	0.00467413	46
	GO:1902600	proton transmembrane transport	19/2302	89/20450	0.0042975	0.0186304	19			GO:0048580	regulation of post-embryonic development	107/3406	485/20450	0.00107097	0.00478526	107
	GO:0010120	camalexin biosynthetic process	5/2302	11/20450	0.00463324	0.0198658	5			GO:0036293	response to decreased oxygen levels	30/3406	103/20450	0.00110463	0.00489939	30
	GO:0051865	protein autoubiquitination	5/2302	11/20450	0.00463324	0.0198658	5			GO:0008544	epidermis development	13/3406	32/20450	0.00110867	0.00489939	13
	GO:0052317	camalexin metabolic process	5/2302	11/20450	0.00463324	0.0198658	5			GO:0009913	epidermal cell differentiation	13/3406	32/20450	0.00110867	0.00489939	13
	GO:2000762	regulation of phenylpropanoid metabolic process	5/2302	11/20450	0.00463324	0.0198658	5			GO:0030855	epithelial cell differentiation	13/3406	32/20450	0.00110867	0.00489939	13
	GO:0010155	regulation of proton transport	17/2302	77/20450	0.00469183	0.0200351	17			GO:0043467	regulation of generation of precursor metabolites and energy	9/3406	18/20450	0.00111886	0.00493091	9
	GO:0009735	response to cytokinin	44/2302	263/20450	0.00469833	0.0200351	44			GO:0019359	nicotinamide nucleotide biosynthetic process	51/3406	202/20450	0.00116562	0.00512302	51
	GO:0048571	long-day photoperiodism	8/2302	25/20450	0.00472548	0.0200961	8			GO:0010193	response to ozone	14/3406	36/20450	0.00120131	0.00526487	14
	GO:0042594	response to starvation	49/2302	301/20450	0.00514253	0.0218105	49			GO:0010155	regulation of proton transport	24/3406	77/20450	0.00120443	0.00526487	24
	GO:0010150	leaf senescence	16/2302	72/20450	0.00559892	0.0235546	16			GO:0009404	toxin metabolic process	55/3406	222/20450	0.00123078	0.00536553	55
	GO:0042744	hydrogen peroxide catabolic process	16/2302	72/20450	0.00559892	0.0235546	16			GO:0010417	glucuronoxylan biosynthetic process	7/3406	12/20450	0.00128226	0.00557489	7
	GO:0090693	plant organ senescence	16/2302	72/20450	0.00559892	0.0235546	16			GO:0051170	import into nucleus	30/3406	104/20450	0.00130908	0.00566098	30
	GO:0034762	regulation of transmembrane transport	23/2302	118/20450	0.00595193	0.0247745	23			GO:0070482	response to oxygen levels	30/3406	104/20450	0.00130908	0.00566098	30
	GO:0034765	regulation of ion transmembrane transport	23/2302	118/20450	0.00595193	0.0247745	23			GO:0006694	steroid biosynthetic process	54/3406	218/20450	0.00136038	0.0058671	54
	GO:0010588	cotyledon vascular tissue pattern formation	6/2302	16/20450	0.00595222	0.0247745	6			GO:0010051	xylem and phloem pattern formation	29/3406	100/20450	0.00142651	0.0061359	29
	GO:0010942	positive regulation of cell death	6/2302	16/20450	0.00595222	0.0247745	6			GO:0000911	cytokinesis by cell plate formation	51/3406	204/20450	0.00146838	0.00626588	51
	GO:0006644	phospholipid metabolic process	63/2302	409/20450	0.0061341	0.0254638	63			GO:0032506	cytokinetic process	51/3406	204/20450	0.00146838	0.00626588	51
	GO:1904062	regulation of cation transmembrane transport	17/2302	79/20450	0.00615759	0.0254937	17			GO:1902410	mitotic cytokinetic process	51/3406	204/20450	0.00146838	0.00626588	51
	GO:0010218	response to far red light	20/2302	99/20450	0.00660736	0.0272837	20			GO:1901659	glycosyl compound biosynthetic process	46/3406	180/20450	0.00151513	0.00644832	46
	GO:0034220	ion transmembrane transport	36/2302	210/20450	0.00670442	0.0276116	36			GO:0048653	anther development	26/3406	87/20450	0.00153007	0.00649474	26
	GO:0032101	regulation of response to external stimulus	9/2302	32/20450	0.00719029	0.0292433	9			GO:0051253	negative regulation of RNA metabolic process	89/3406	397/20450	0.00163724	0.00693139	89
	GO:0009403	toxin biosynthetic process	5/2302	12/20450	0.00721273	0.0292433	5			GO:0000281	mitotic cytokinesis	52/3406	210/20450	0.00166249	0.00701988	52
	GO:0009700	indole phytoalexin biosynthetic process	5/2302	12/20450	0.00721273	0.0292433	5			GO:0052546	cell wall pectin metabolic process	15/3406	41/20450	0.00168254	0.007086	15
	GO:0046217	indole phytoalexin metabolic process	5/2302	12/20450	0.00721273	0.0292433	5			GO:0006606	protein import into nucleus	29/3406	101/20450	0.00168795	0.00709029	29
	GO:0052314	phytoalexin metabolic process	5/2302	12/20450	0.00721273	0.0292433	5			GO:0072594	establishment of protein localization to organelle	104/3406	476/20450	0.00173992	0.00728959	104
	GO:0052315	phytoalexin biosynthetic process	5/2302	12/20450	0.00721273	0.0292433	5			GO:1904062	regulation of cation transmembrane transport	24/3406	79/20450	0.00178231	0.00744785	24
	GO:0015824	proline transport	16/2302	74/20450	0.00737649	0.02983	16			GO:0034504	protein localization to nucleus	30/3406	106/20450	0.00181802	0.00755792	30
	GO:0010017	red or far-red light signaling pathway	11/2302	44/20450	0.00814305	0.032845	11			GO:0060918	auxin transport	30/3406	106/20450	0.00181802	0.00755792	30
	GO:0015748	organophosphate ester transport	12/2302	50/20450	0.00823638	0.0331361	12			GO:0019363	pyridine nucleotide biosynthetic process	51/3406	206/20450	0.00183814	0.00762192	51
	GO:0048584	positive regulation of response to stimulus	20/2302	101/20450	0.00828342	0.0332399	20			GO:0015698	inorganic anion transport	61/3406	256/20450	0.001915	0.00792024	61
	GO:0051181	cofactor transport	6/2302	17/20450	0.00833446	0.0333592	6			GO:0009926	auxin polar transport	29/3406	102/20450	0.00198965	0.00820793	29
	GO:0009682	induced systemic resistance	7/2302	22/20450	0.00838941	0.0334934	7			GO:0043562	cellular response to nitrogen levels	12/3406	30/20450	0.00200401	0.0082461	12
	GO:0010075	regulation of meristem growth	30/2302	171/20450	0.00908977	0.0361972	30			GO:0006611	protein export from nucleus	22/3406	71/20450	0.00205547	0.00843633	22
	GO:0008654	phospholipid biosynthetic process	59/2302	386/20450	0.00913568	0.0362877	59			GO:0000910	cytokinesis	52/3406	212/20450	0.00206828	0.00843821	52
	GO:0006655	phosphatidylglycerol biosynthetic process	14/2302	63/20450	0.00921479	0.0364702	14			GO:0061640	cytoskeleton-dependent cytokinesis	52/3406	212/20450	0.00206828	0.00843821	52
	GO:0017000	antibiotic biosynthetic process	46/2302	288/20450	0.00922825	0.0364702	46			GO:0006595	polyamine metabolic process	18/3406	54/20450	0.00207162	0.00843821	18
	GO:0071669	plant-type cell wall organization or biogenesis	71/2302	479/20450	0.00941915	0.0371309	71			GO:0009806	lignan metabolic process	8/3406	16/20450	0.00212936	0.00855003	8
	GO:0006544	glycine metabolic process	13/2302	57/20450	0.00951177	0.0373873	13			GO:0009807	lignan biosynthetic process	8/3406	16/20450	0.00212936	0.00855003	8
	GO:0031669	cellular response to nutrient levels	49/2302	311/20450	0.00953196	0.0373873	49			GO:0052482	defense response by cell wall thickening	8/3406	16/20450	0.00212936	0.00855003	8
	GO:0006546	glycine catabolic process	12/2302	51/20450	0.00969332	0.0379251	12			GO:0052544	defense response by callose deposition in cell wall	8/3406	16/20450	0.00212936	0.00855003	8
	GO:0050790	regulation of catalytic activity	34/2302	201/20450	0.0100621	0.0392699	34			GO:0009914	hormone transport	30/3406	107/20450	0.00213088	0.00855003	30
	GO:0010476	gibberellin mediated signaling pathway	17/2302	83/20450	0.0101974	0.0396987	17			GO:0010087	phloem or xylem histogenesis	30/3406	107/20450	0.00213088	0.00855003	30
	GO:0006040	amino sugar metabolic process	5/2302	13/20450	0.0106471	0.0411425	5			GO:0015748	organophosphate ester transport	17/3406	50/20450	0.00214479	0.0085845	17
	GO:0033500	carbohydrate homeostasis	5/2302	13/20450	0.0106471	0.0411425	5			GO:0007568	aging	40/3406	154/20450	0.00215405	0.00860022	40
	GO:0046246	terpene biosynthetic process	5/2302	13/20450	0.0106471	0.0411425	5			GO:1902600	proton transmembrane transport	26/3406	89/20450	0.00218642	0.00866368	26
	GO:0015804	neutral amino acid transport	16/2302	77/20450	0.0108625	0.0418714	16			GO:0031503	protein-containing complex localization	21/3406	67/20450	0.00219665	0.00866368	21
	GO:0006995	cellular response to nitrogen starvation	7/2302	23/20450	0.0109094	0.041949	7			GO:0071166	ribonucleoprotein complex localization	21/3406	67/20450	0.00219665	0.00866368	21
	GO:0009407	toxin catabolic process	35/2302	210/20450	0.0114017	0.0437343	35			GO:0071426	ribonucleoprotein complex export from nucleus	21/3406	67/20450	0.00219665	0.00866368	21
	GO:0080147	root hair cell development	34/2302	203/20450	0.0116373	0.0445291	34			GO:0042752	regulation of circadian rhythm	16/3406	46/20450	0.0021968	0.00866368	16
	GO:0006816	calcium ion transport	22/2302	118/20450	0.0118328	0.0451668	22			GO:0009269	response to desiccation	14/3406	38/20450	0.00220302	0.00866701	14
	GO:0048598	embryonic morphogenesis	8/2302	29/20450	0.0124775	0.0475117	8			GO:0009966	regulation of signal transduction	37/3406	140/20450	0.00223532	0.00877267	37
	GO:0009110	vitamin biosynthetic process	13/2302	59/20450	0.0127249	0.0483362	13			GO:0055114	oxidation-reduction process	83/3406	370/20450	0.00225325	0.00882156	83
	GO:0009966	regulation of signal transduction	25/2302	140/20450	0.0130961	0.0496256	25			GO:0033365	protein localization to organelle	105/3406	485/20450	0.00225971	0.00882544	105
	GO:0009071	serine family amino acid catabolic process	12/2302	53/20450	0.0131991	0.0497749	12			GO:0045892	negative regulation of transcription, DNA-templated	87/3406	391/20450	0.00229962	0.00891655	87
	GO:0042135	neurotransmitter catabolic process	12/2302	53/20450	0.0131991	0.0497749	12			GO:1902679	negative regulation of RNA biosynthetic process	87/3406	391/20450	0.00229962	0.00891655	87
	GO:0019318	hexose metabolic process	44/2302	279/20450	0.0132386	0.0497802	44			GO:1903507	negative regulation of nucleic acid-templated transcription	87/3406	391/20450	0.00229962	0.00891655	87
	GO:0002213	defense response to insect	9/2302	35/20450	0.0132959	0.0497802	9			GO:0010646	regulation of cell communication	38/3406	145/20450	0.002311	0.00893918	38
	GO:0009816	defense response to bacterium, incompatible interaction	9/2302	35/20450	0.0132959	0.0497802	9			GO:0051168	nuclear export	22/3406	72/20450	0.00250202	0.00965493	22
GO-MF	GO:0046527	glucosyltransferase activity	36/2233	138/20166	6.51355e-07	0.000304834	36			GO:0006766	vitamin metabolic process	28/3406	99/20450	0.00256051	0.00985705	28
	GO:0016758	transferase activity, transferring hexosyl groups	58/2233	279/20166	1.55632e-06	0.00032807	58			GO:0015802	basic amino acid transport	11/3406	27/20450	0.00257823	0.00990162	11
	GO:0016829	lyase activity	57/2233	275/20166	2.10301e-06	0.00032807	57			GO:0006403	RNA localization	21/3406	68/20450	0.0026876	0.0102002	21
	GO:0008194	UDP-glycosyltransferase activity	44/2233	201/20166	6.94097e-06	0.000812093	44			GO:0006405	RNA export from nucleus	21/3406	68/20450	0.0026876	0.0102002	21
	GO:0035251	UDP-glucosyltransferase activity	24/2233	86/20166	1.34924e-05	0.00126288	24			GO:0050657	nucleic acid transport	21/3406	68/20450	0.0026876	0.0102002	21
	GO:0016838	carbon-oxygen lyase activity, acting on phosphates	7/2233	11/20166	4.45359e-05	0.0034738	7			GO:0050658	RNA transport	21/3406	68/20450	0.0026876	0.0102002	21
	GO:0016701	oxidoreductase activity, acting on single donors with incorporation of molecular oxygen	11/2233	27/20166	7.1947e-05	0.00437745	11			GO:0051236	establishment of RNA localization	21/3406	68/20450	0.0026876	0.0102002	21
	GO:0016798	hydrolase activity, acting on glycosyl bonds	71/2233	408/20166	7.48282e-05	0.00437745	71			GO:0045934	negative regulation of nucleobase-containing compound metabolic process	90/3406	409/20450	0.00274701	0.0104012	90
	GO:0004553	hydrolase activity, hydrolyzing O-glycosyl compounds	62/2233	352/20166	0.000146837	0.00763552	62			GO:0034762	regulation of transmembrane transport	32/3406	118/20450	0.00276747	0.0104297	32
	GO:0015103	inorganic anion transmembrane transporter activity	21/2233	82/20166	0.000176369	0.00772947	21			GO:0034765	regulation of ion transmembrane transport	32/3406	118/20450	0.00276747	0.0104297	32
	GO:0008509	anion transmembrane transporter activity	43/2233	222/20166	0.000181676	0.00772947	43			GO:0015804	neutral amino acid transport	23/3406	77/20450	0.00279881	0.0105233	23
	GO:0016830	carbon-carbon lyase activity	22/2233	93/20166	0.000422751	0.0164873	22			GO:0072525	pyridine-containing compound biosynthetic process	52/3406	215/20450	0.00283851	0.0106477	52
	GO:0015267	channel activity	26/2233	123/20166	0.000856699	0.0286382	26			GO:0060429	epithelium development	13/3406	35/20450	0.00288605	0.0108009	13
	GO:0022803	passive transmembrane transporter activity	26/2233	123/20166	0.000856699	0.0286382	26			GO:0009799	specification of symmetry	33/3406	123/20450	0.00289335	0.0108032	33
	GO:0042802	identical protein binding	30/2233	153/20166	0.00130958	0.0368495	30			GO:0023051	regulation of signaling	37/3406	142/20450	0.00290982	0.0108396	37
	GO:0022838	substrate-specific channel activity	25/2233	120/20166	0.00132518	0.0368495	25			GO:0046777	protein autophosphorylation	38/3406	147/20450	0.00299058	0.0111147	38
	GO:0022804	active transmembrane transporter activity	73/2233	465/20166	0.00133855	0.0368495	73			GO:0001666	response to hypoxia	28/3406	100/20450	0.00300151	0.0111297	28
GO-CC	GO:0048046	apoplast	71/2562	327/24419	1.9728e-09	1.70631e-07	71			GO:0006576	cellular biogenic amine metabolic process	40/3406	157/20450	0.00313061	0.0115818	40
	GO:0005774	vacuolar membrane	94/2562	482/24419	2.12469e-09	1.70631e-07	94			GO:0046434	organophosphate catabolic process	54/3406	226/20450	0.00314995	0.0116267	54
	GO:0044437	vacuolar part	94/2562	486/24419	3.28731e-09	1.70631e-07	94			GO:0044106	cellular amine metabolic process	42/3406	167/20450	0.00324364	0.0119289	42
	GO:0009505	plant-type cell wall	62/2562	274/24419	3.87798e-09	1.70631e-07	62			GO:0010393	galacturonan metabolic process	18/3406	56/20450	0.00325401	0.0119289	18
	GO:0005777	peroxisome	46/2562	185/24419	1.88242e-08	5.52176e-07	46			GO:0045488	pectin metabolic process	18/3406	56/20450	0.00325401	0.0119289	18
	GO:0042579	microbody	46/2562	185/24419	1.88242e-08	5.52176e-07	46			GO:0060548	negative regulation of cell death	43/3406	172/20450	0.0032907	0.0120256	43
	GO:0009579	thylakoid	83/2562	470/24419	1.45195e-06	3.65061e-05	83			GO:0008356	asymmetric cell division	10/3406	24/20450	0.00330274	0.0120256	10
	GO:0009534	chloroplast thylakoid	68/2562	393/24419	2.4617e-05	0.000481399	68			GO:0052541	plant-type cell wall cellulose metabolic process	10/3406	24/20450	0.00330274	0.0120256	10
	GO:0031976	plastid thylakoid	68/2562	393/24419	2.4617e-05	0.000481399	68			GO:0009166	nucleotide catabolic process	48/3406	197/20450	0.00344261	0.0124785	48
	GO:0044436	thylakoid part	60/2562	350/24419	9.37853e-05	0.00165062	60			GO:1901292	nucleoside phosphate catabolic process	48/3406	197/20450	0.00344261	0.0124785	48
	GO:0009535	chloroplast thylakoid membrane	52/2562	293/24419	0.000109059	0.00174495	52			GO:0018022	peptidyl-lysine methylation	56/3406	237/20450	0.00346108	0.0125173	56
	GO:0055035	plastid thylakoid membrane	52/2562	295/24419	0.000130238	0.00181776	52			GO:0048584	positive regulation of response to stimulus	28/3406	101/20450	0.00350534	0.012649	28
	GO:0042651	thylakoid membrane	54/2562	310/24419	0.000134266	0.00181776	54			GO:0043069	negative regulation of programmed cell death	42/3406	168/20450	0.0036424	0.0131143	42
	GO:0034357	photosynthetic membrane	54/2562	311/24419	0.000146196	0.0018379	54			GO:0009735	response to cytokinin	61/3406	263/20450	0.00369689	0.0132808	61
	GO:0009295	nucleoid	12/2562	43/24419	0.00118971	0.0139592	12			GO:0006406	mRNA export from nucleus	19/3406	61/20450	0.00377143	0.0134304	19
	GO:0010598	NAD(P)H dehydrogenase complex (plastoquinone)	5/2562	10/24419	0.00202754	0.022303	5			GO:0051028	mRNA transport	19/3406	61/20450	0.00377143	0.0134304	19
	GO:0042646	plastid nucleoid	9/2562	29/24419	0.00215644	0.0223255	9			GO:0071427	mRNA-containing ribonucleoprotein complex export from nucleus	19/3406	61/20450	0.00377143	0.0134304	19
	GO:0022625	cytosolic large ribosomal subunit	23/2562	121/24419	0.00347924	0.0340193	23			GO:0072521	purine-containing compound metabolic process	68/3406	299/20450	0.00377183	0.0134304	68
	GO:0000325	plant-type vacuole	20/2562	101/24419	0.00382101	0.0353946	20			GO:0032101	regulation of response to external stimulus	12/3406	32/20450	0.00378266	0.0134393	12
KEGG	ath00592	alpha-Linolenic acid metabolism	17/613	42/4992	3.44516e-06	0.000372078	17			GO:0009825	multidimensional cell growth	30/3406	111/20450	0.00388607	0.0137763	30
	ath01230	Biosynthesis of amino acids	53/613	250/4992	3.03993e-05	0.00164156	53			GO:0009955	adaxial/abaxial pattern specification	25/3406	88/20450	0.00396027	0.0140086	25
	ath00500	Starch and sucrose metabolism	38/613	165/4992	6.66641e-05	0.00239991	38			GO:0008361	regulation of cell size	18/3406	57/20450	0.00402825	0.0142179	18
	ath04712	Circadian rhythm - plant	13/613	36/4992	0.00019788	0.00534275	13			GO:0055085	transmembrane transport	84/3406	383/20450	0.00407505	0.014334	84
	ath00260	Glycine, serine and threonine metabolism	18/613	70/4992	0.00150383	0.0324827	18			GO:0034219	carbohydrate transmembrane transport	7/3406	14/20450	0.00407893	0.014334	7
	ath01200	Carbon metabolism	48/613	263/4992	0.00256362	0.0461452	48			GO:0010119	regulation of stomatal movement	17/3406	53/20450	0.00428091	0.0150111	17
	ath00270	Cysteine and methionine metabolism	25/613	116/4992	0.003091	0.0476897	25			GO:0006163	purine nucleotide metabolic process	63/3406	275/20450	0.00433297	0.0151447	63
										GO:0010286	heat acclimation	24/3406	84/20450	0.00433779	0.0151447	24
										GO:0051865	protein autoubiquitination	6/3406	11/20450	0.00458083	0.0159243	6
										GO:2000762	regulation of phenylpropanoid metabolic process	6/3406	11/20450	0.00458083	0.0159243	6
										GO:0009639	response to red or far red light	89/3406	411/20450	0.00460964	0.01599	89
										GO:0098771	inorganic ion homeostasis	36/3406	141/20450	0.00470099	0.0162027	36
										GO:0009142	nucleoside triphosphate biosynthetic process	49/3406	205/20450	0.00470109	0.0162027	49
										GO:0034404	nucleobase-containing small molecule biosynthetic process	49/3406	205/20450	0.00470109	0.0162027	49
										GO:0009855	determination of bilateral symmetry	32/3406	122/20450	0.00481503	0.01656	32
										GO:0009581	detection of external stimulus	14/3406	41/20450	0.00491347	0.0168626	14
										GO:0034968	histone lysine methylation	55/3406	236/20450	0.00506401	0.0173424	55
										GO:0016125	sterol metabolic process	42/3406	171/20450	0.00509965	0.0174274	42
										GO:0006096	glycolytic process	47/3406	196/20450	0.00519777	0.0174667	47
										GO:0006165	nucleoside diphosphate phosphorylation	47/3406	196/20450	0.00519777	0.0174667	47
										GO:0006757	ATP generation from ADP	47/3406	196/20450	0.00519777	0.0174667	47
										GO:0009135	purine nucleoside diphosphate metabolic process	47/3406	196/20450	0.00519777	0.0174667	47
										GO:0009179	purine ribonucleoside diphosphate metabolic process	47/3406	196/20450	0.00519777	0.0174667	47
										GO:0009185	ribonucleoside diphosphate metabolic process	47/3406	196/20450	0.00519777	0.0174667	47
										GO:0042866	pyruvate biosynthetic process	47/3406	196/20450	0.00519777	0.0174667	47
										GO:0046031	ADP metabolic process	47/3406	196/20450	0.00519777	0.0174667	47
										GO:0034605	cellular response to heat	8/3406	18/20450	0.00529505	0.0177566	8
										GO:0003002	regionalization	56/3406	242/20450	0.0055057	0.0184247	56
										GO:0009943	adaxial/abaxial axis specification	23/3406	81/20450	0.0056058	0.0187208	23
										GO:0010150	leaf senescence	21/3406	72/20450	0.00566698	0.0187312	21
										GO:0048447	sepal morphogenesis	21/3406	72/20450	0.00566698	0.0187312	21
										GO:0048451	petal formation	21/3406	72/20450	0.00566698	0.0187312	21
										GO:0048453	sepal formation	21/3406	72/20450	0.00566698	0.0187312	21
										GO:0090693	plant organ senescence	21/3406	72/20450	0.00566698	0.0187312	21
										GO:0009127	purine nucleoside monophosphate biosynthetic process	50/3406	212/20450	0.00570786	0.0187673	50
										GO:0009168	purine ribonucleoside monophosphate biosynthetic process	50/3406	212/20450	0.00570786	0.0187673	50
										GO:0006986	response to unfolded protein	45/3406	187/20450	0.00574421	0.0187673	45
										GO:0034620	cellular response to unfolded protein	45/3406	187/20450	0.00574421	0.0187673	45
										GO:0035967	cellular response to topologically incorrect protein	45/3406	187/20450	0.00574421	0.0187673	45
										GO:0046939	nucleotide phosphorylation	47/3406	197/20450	0.00574772	0.0187673	47
										GO:0007010	cytoskeleton organization	103/3406	489/20450	0.00585	0.0190627	103
										GO:0071489	cellular response to red or far red light	15/3406	46/20450	0.00596624	0.0194023	15
										GO:0009749	response to glucose	24/3406	86/20450	0.00599063	0.0194424	24
										GO:0033037	polysaccharide localization	27/3406	100/20450	0.00603583	0.0195498	27
										GO:0006949	syncytium formation	9/3406	22/20450	0.00607512	0.0195983	9
										GO:0031408	oxylipin biosynthetic process	9/3406	22/20450	0.00607512	0.0195983	9
										GO:0009132	nucleoside diphosphate metabolic process	47/3406	198/20450	0.0063462	0.0203834	47
										GO:0051567	histone H3-K9 methylation	44/3406	183/20450	0.00635639	0.0203834	44
										GO:0061647	histone H3-K9 modification	44/3406	183/20450	0.00635639	0.0203834	44
										GO:0006862	nucleotide transport	13/3406	38/20450	0.00649888	0.0207866	13
										GO:1903047	mitotic cell cycle process	57/3406	249/20450	0.00650789	0.0207866	57
										GO:0009957	epidermal cell fate specification	7/3406	15/20450	0.00655794	0.020905	7
										GO:0006913	nucleocytoplasmic transport	38/3406	154/20450	0.00687483	0.0217304	38
										GO:0051169	nuclear transport	38/3406	154/20450	0.00687483	0.0217304	38
										GO:0009124	nucleoside monophosphate biosynthetic process	50/3406	214/20450	0.00689718	0.0217304	50
										GO:0009156	ribonucleoside monophosphate biosynthetic process	50/3406	214/20450	0.00689718	0.0217304	50
										GO:0002237	response to molecule of bacterial origin	27/3406	101/20450	0.00695911	0.0217304	27
										GO:0006754	ATP biosynthetic process	48/3406	204/20450	0.0069692	0.0217304	48
										GO:0009145	purine nucleoside triphosphate biosynthetic process	48/3406	204/20450	0.0069692	0.0217304	48
										GO:0009201	ribonucleoside triphosphate biosynthetic process	48/3406	204/20450	0.0069692	0.0217304	48
										GO:0009206	purine ribonucleoside triphosphate biosynthetic process	48/3406	204/20450	0.0069692	0.0217304	48
										GO:0006714	sesquiterpenoid metabolic process	16/3406	51/20450	0.00697125	0.0217304	16
										GO:0016126	sterol biosynthetic process	40/3406	164/20450	0.00697175	0.0217304	40
										GO:0009909	regulation of flower development	78/3406	359/20450	0.00697852	0.0217304	78
										GO:0034220	ion transmembrane transport	49/3406	210/20450	0.00761721	0.0236735	49
										GO:0052545	callose localization	26/3406	97/20450	0.00769669	0.0238745	26
										GO:0009063	cellular amino acid catabolic process	39/3406	160/20450	0.00772358	0.023912	39
										GO:0030968	endoplasmic reticulum unfolded protein response	44/3406	185/20450	0.00777815	0.0240348	44
										GO:0009765	photosynthesis, light harvesting	8/3406	19/20450	0.00782717	0.0240939	8
										GO:0042214	terpene metabolic process	8/3406	19/20450	0.00782717	0.0240939	8
										GO:0010565	regulation of cellular ketone metabolic process	14/3406	43/20450	0.00788698	0.0242318	14
										GO:0015824	proline transport	21/3406	74/20450	0.00795699	0.0244004	21
										GO:0009944	polarity specification of adaxial/abaxial axis	22/3406	79/20450	0.00849436	0.0259989	22
										GO:0007584	response to nutrient	9/3406	23/20450	0.00852732	0.0260011	9
										GO:1901568	fatty acid derivative metabolic process	9/3406	23/20450	0.00852732	0.0260011	9
										GO:0048831	regulation of shoot system development	84/3406	394/20450	0.00871933	0.0264335	84
										GO:0045036	protein targeting to chloroplast	20/3406	70/20450	0.00873469	0.0264335	20
										GO:0072596	establishment of protein localization to chloroplast	20/3406	70/20450	0.00873469	0.0264335	20
										GO:0072598	protein localization to chloroplast	20/3406	70/20450	0.00873469	0.0264335	20
										GO:0015696	ammonium transport	11/3406	31/20450	0.00881088	0.0265717	11
										GO:0043455	regulation of secondary metabolic process	10/3406	27/20450	0.0088133	0.0265717	10
										GO:0010256	endomembrane system organization	46/3406	197/20450	0.0093552	0.0280502	46
										GO:0048442	sepal development	21/3406	75/20450	0.00935588	0.0280502	21
										GO:0048464	flower calyx development	21/3406	75/20450	0.00935588	0.0280502	21
										GO:0001708	cell fate specification	17/3406	57/20450	0.00956426	0.0285782	17
										GO:0043473	pigmentation	29/3406	113/20450	0.00965599	0.0285782	29
										GO:0043476	pigment accumulation	29/3406	113/20450	0.00965599	0.0285782	29
										GO:0043478	pigment accumulation in response to UV light	29/3406	113/20450	0.00965599	0.0285782	29
										GO:0043479	pigment accumulation in tissues in response to UV light	29/3406	113/20450	0.00965599	0.0285782	29
										GO:0043480	pigment accumulation in tissues	29/3406	113/20450	0.00965599	0.0285782	29
										GO:0043481	anthocyanin accumulation in tissues in response to UV light	29/3406	113/20450	0.00965599	0.0285782	29
										GO:0009152	purine ribonucleotide biosynthetic process	51/3406	223/20450	0.00980699	0.0289719	51
										GO:0010017	red or far-red light signaling pathway	14/3406	44/20450	0.00983085	0.0289893	14
										GO:2000241	regulation of reproductive process	90/3406	428/20450	0.0099017	0.029145	90
										GO:0080147	root hair cell development	47/3406	203/20450	0.0101859	0.0299268	47
										GO:0048767	root hair elongation	44/3406	188/20450	0.0104032	0.0305097	44
[truncated: 98 more rows]

## Sheet: Table S4
Table S4 Identification of MLP-responsive genes.
[truncated: 7,116 more rows]

[truncated: 7 more sheets: Table S5, Table S6, Table S7, Table S8, Table S9, Table S10, Table S11]
